# Supplementary material for: Refinement and extension of COSMO-RS-trained fragment contribution models for predicting the partition properties of C 10–20 chlorinated paraffin congeners
Source: Royal Society of Chemistry journal article supplement (doi:10.1039/d1em00123j), 2021-01-01

Electronic supplementary information-2 (ESI-2) for  
“Refinement and extension of COSMO-RS-trained fragment contribution models for  
predicting partition properties of C<sub>10–20</sub> chlorinated paraffin congeners”

Satoshi Endo

Center for Health and Environmental Risk Research, National Institute for Environmental Studies  
(NIES), Onogawa 16-2, 305-8506 Tsukuba, Ibaraki, Japan

Phone: ++81-29-850-2695, [endo.satoshi@nies.go.jp](mailto:endo.satoshi@nies.go.jp)

**Property distributions of CP mixtures with a carbon-chain length of C<sub>10–20</sub> and a chlorination degree of 30–70 wt%:  
log  $K_{ow}$ , log  $K_{aw}$ , log  $K_{oa}$**

# C<sub>10</sub>, 30 wt% Cl

Total counts, 10,000; <100 counts omitted; bin width, 0.1; values, median

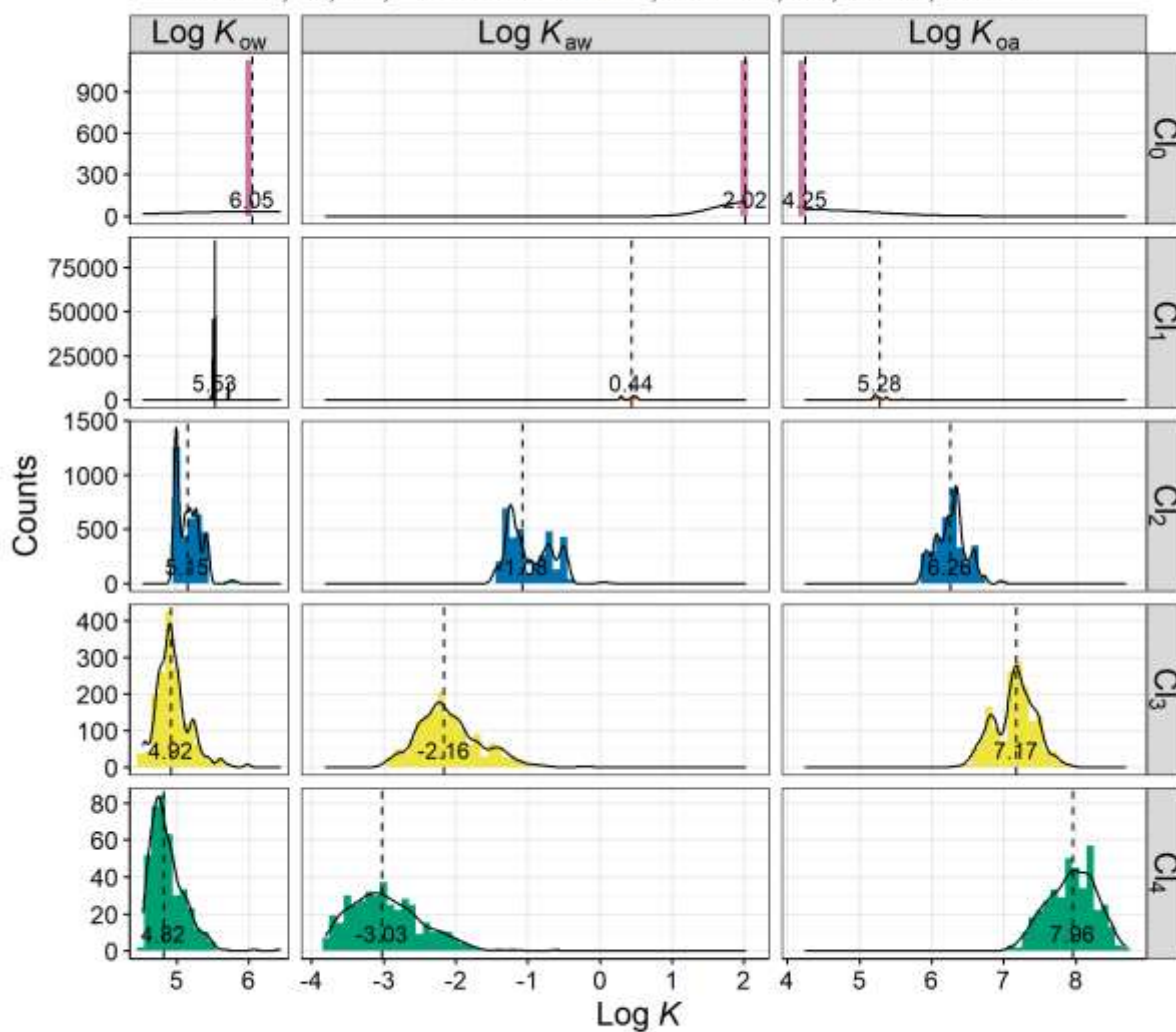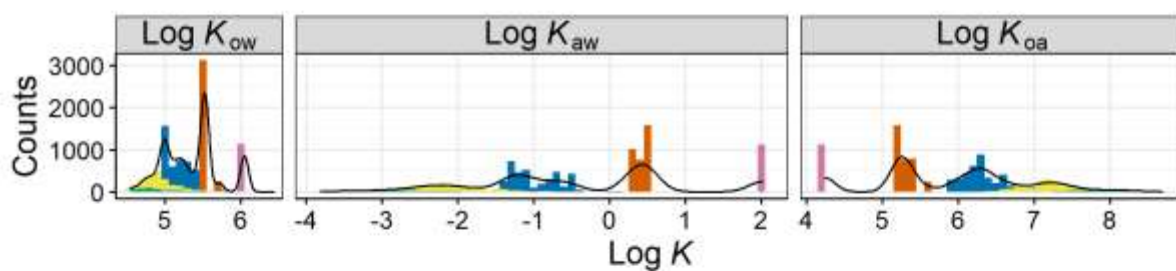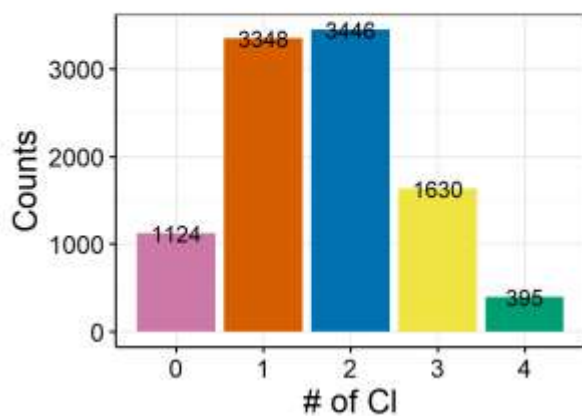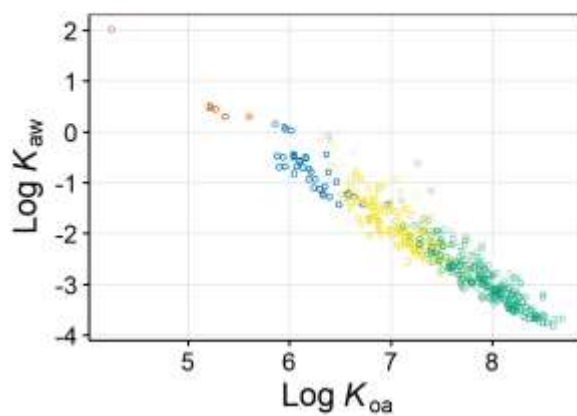

# C<sub>10</sub>, 40 wt% CI

Total counts, 10,000; <100 counts omitted; bin width, 0.1; values, median

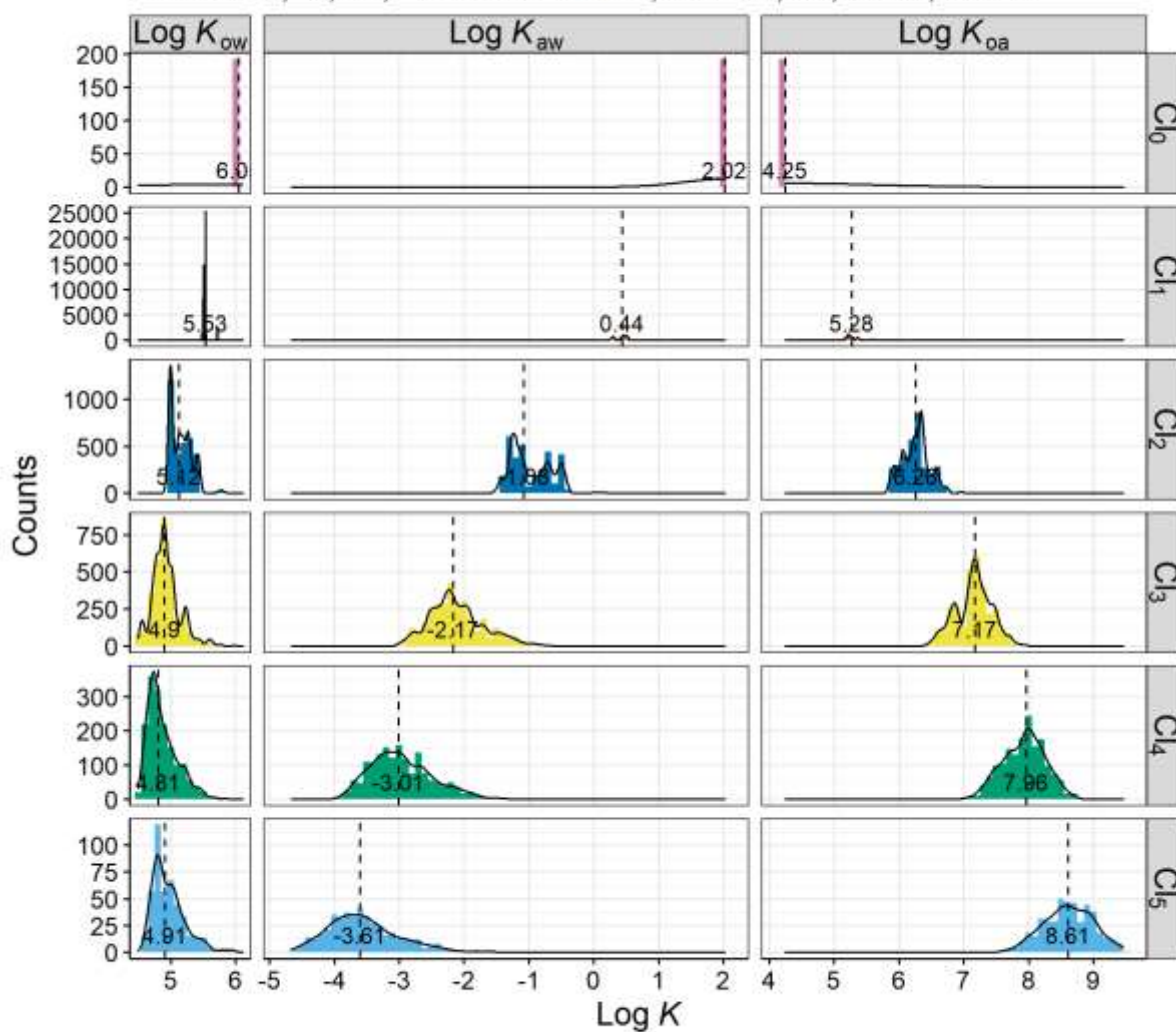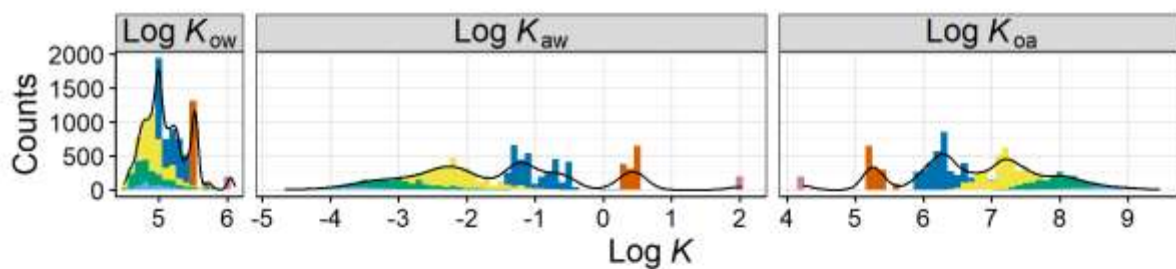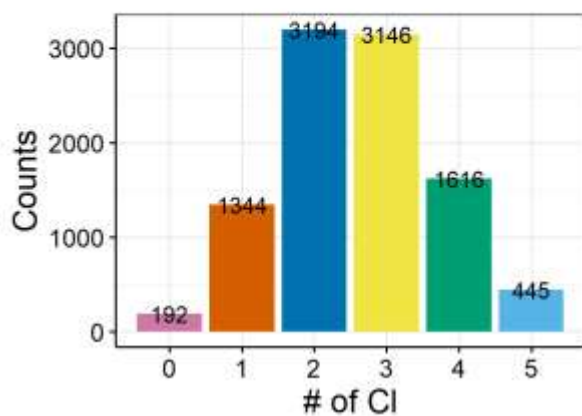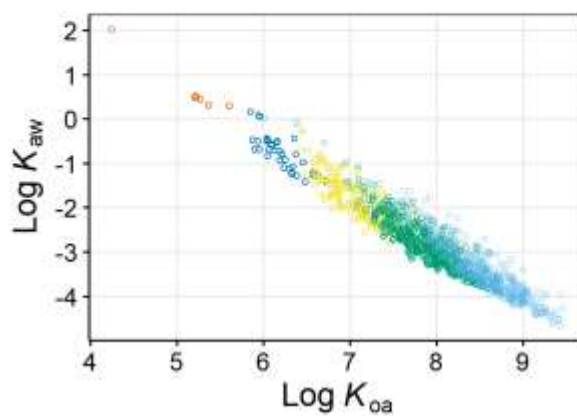



# C<sub>10</sub>, 50 wt% CI

Total counts, 10,000; <100 counts omitted; bin width, 0.1; values, median

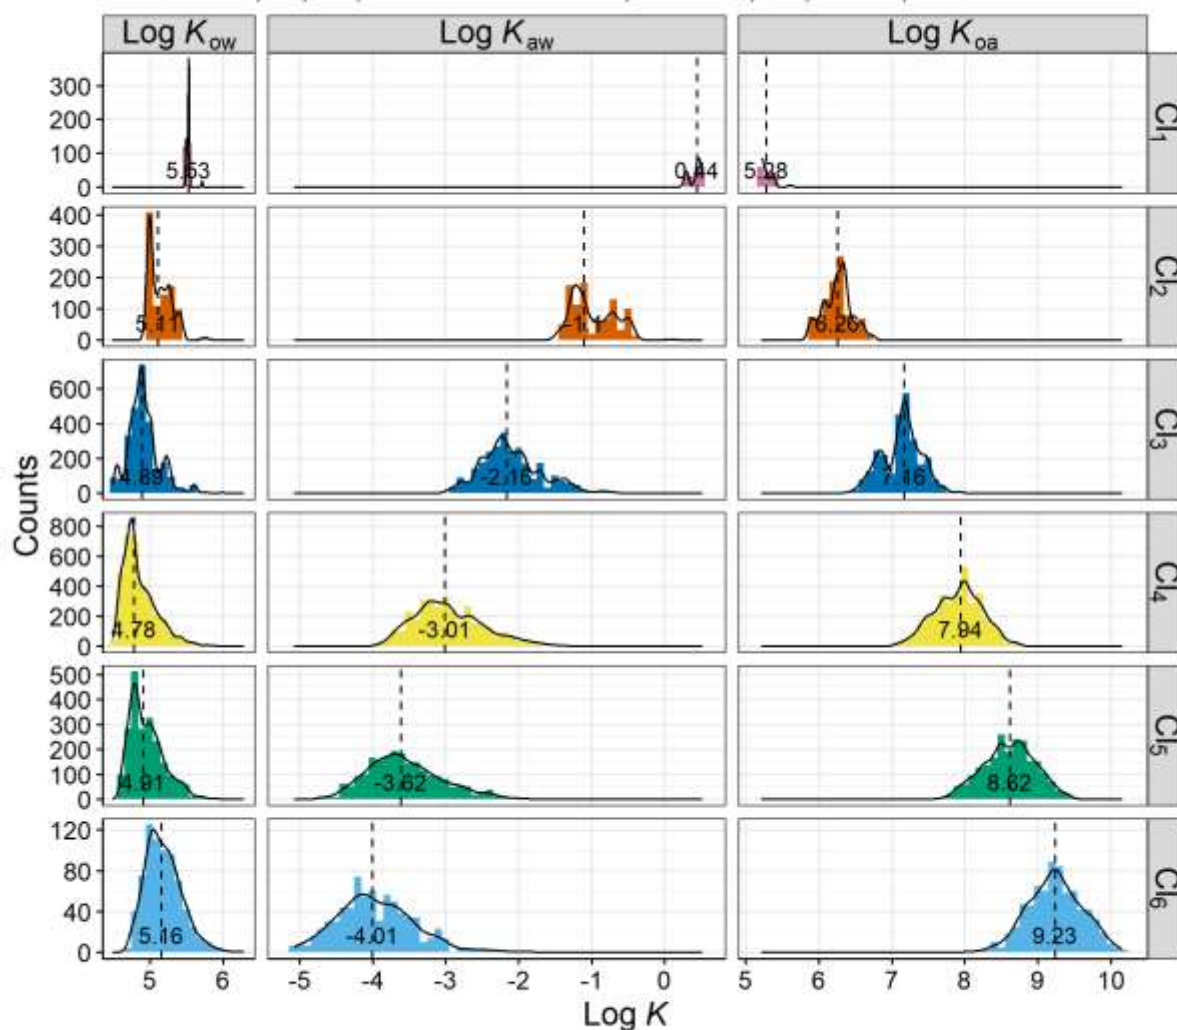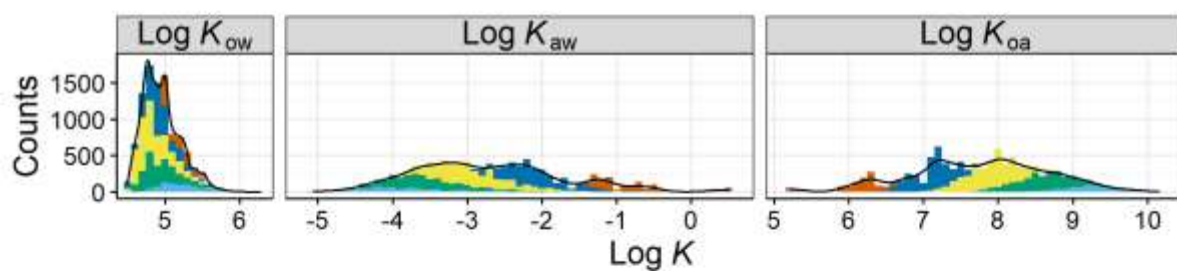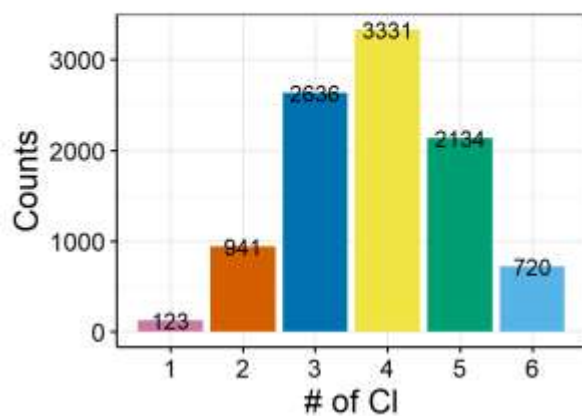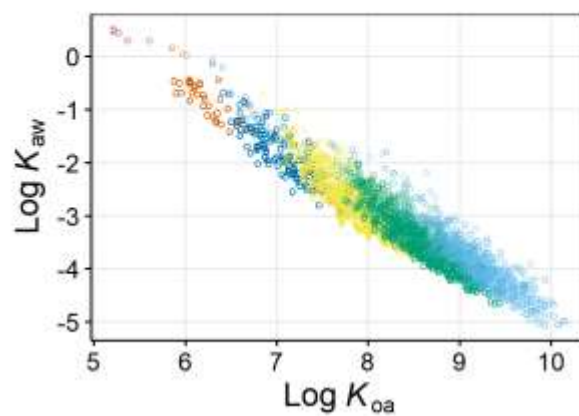

# C<sub>10</sub>, 60 wt% Cl

Total counts, 10,000; <100 counts omitted; bin width, 0.1; values, median

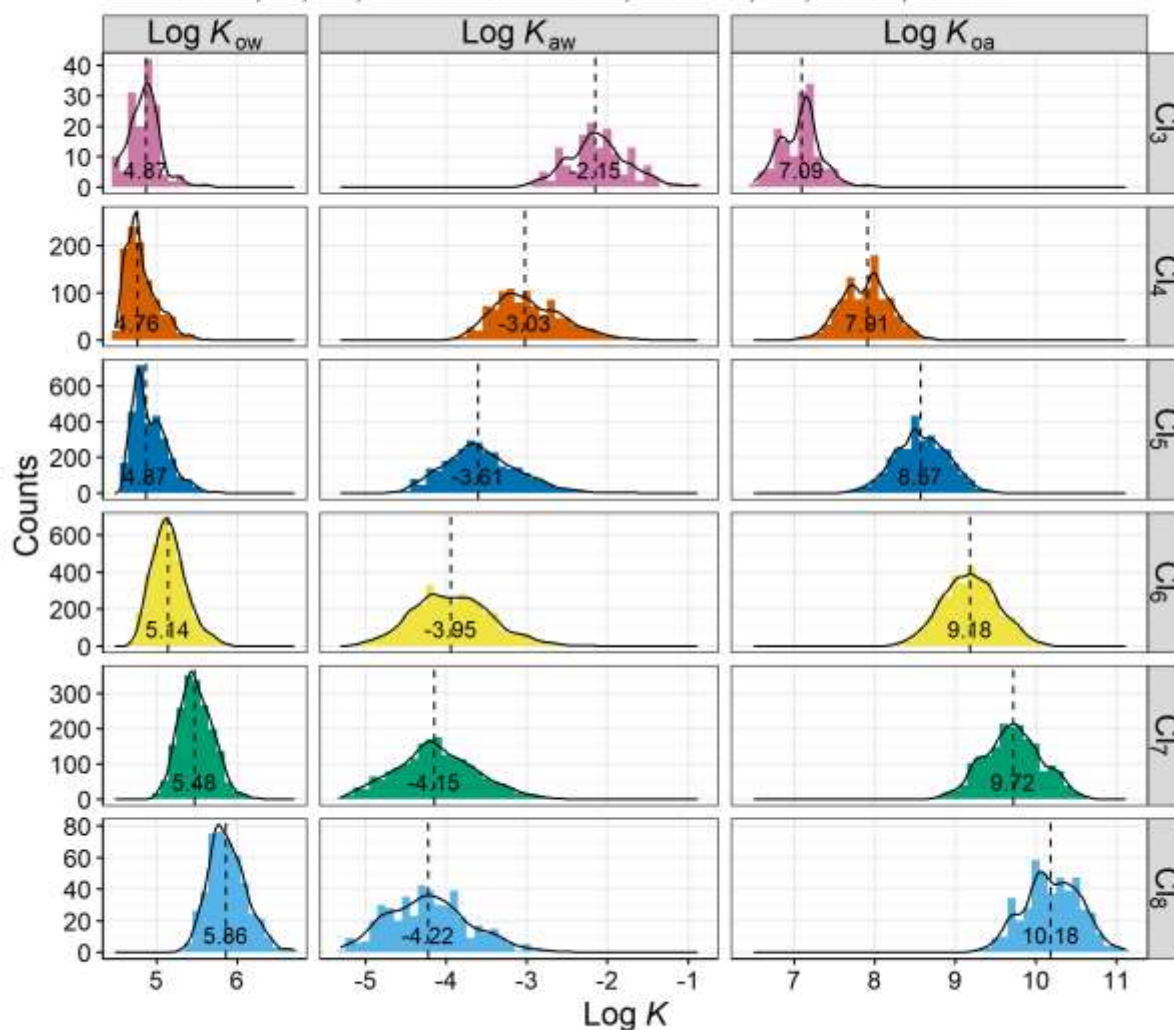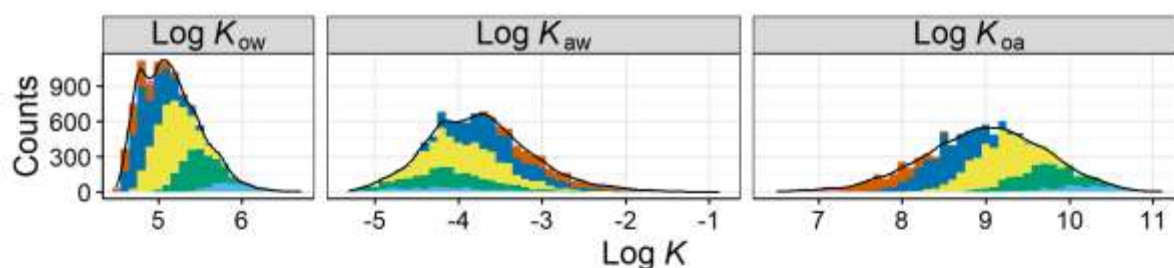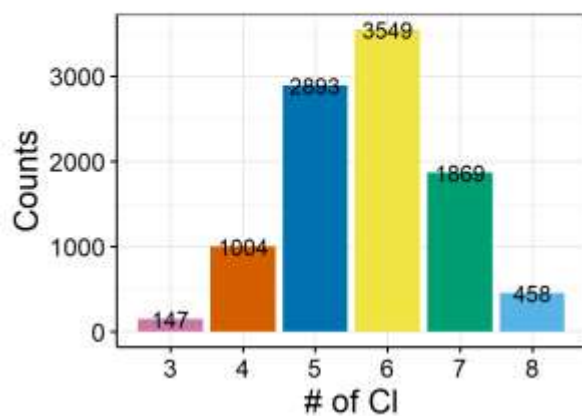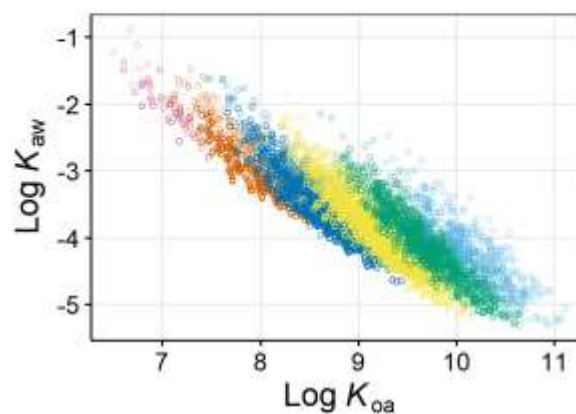

# C<sub>10</sub>, 70 wt% CI

Total counts, 10,000; <100 counts omitted; bin width, 0.1; values, median

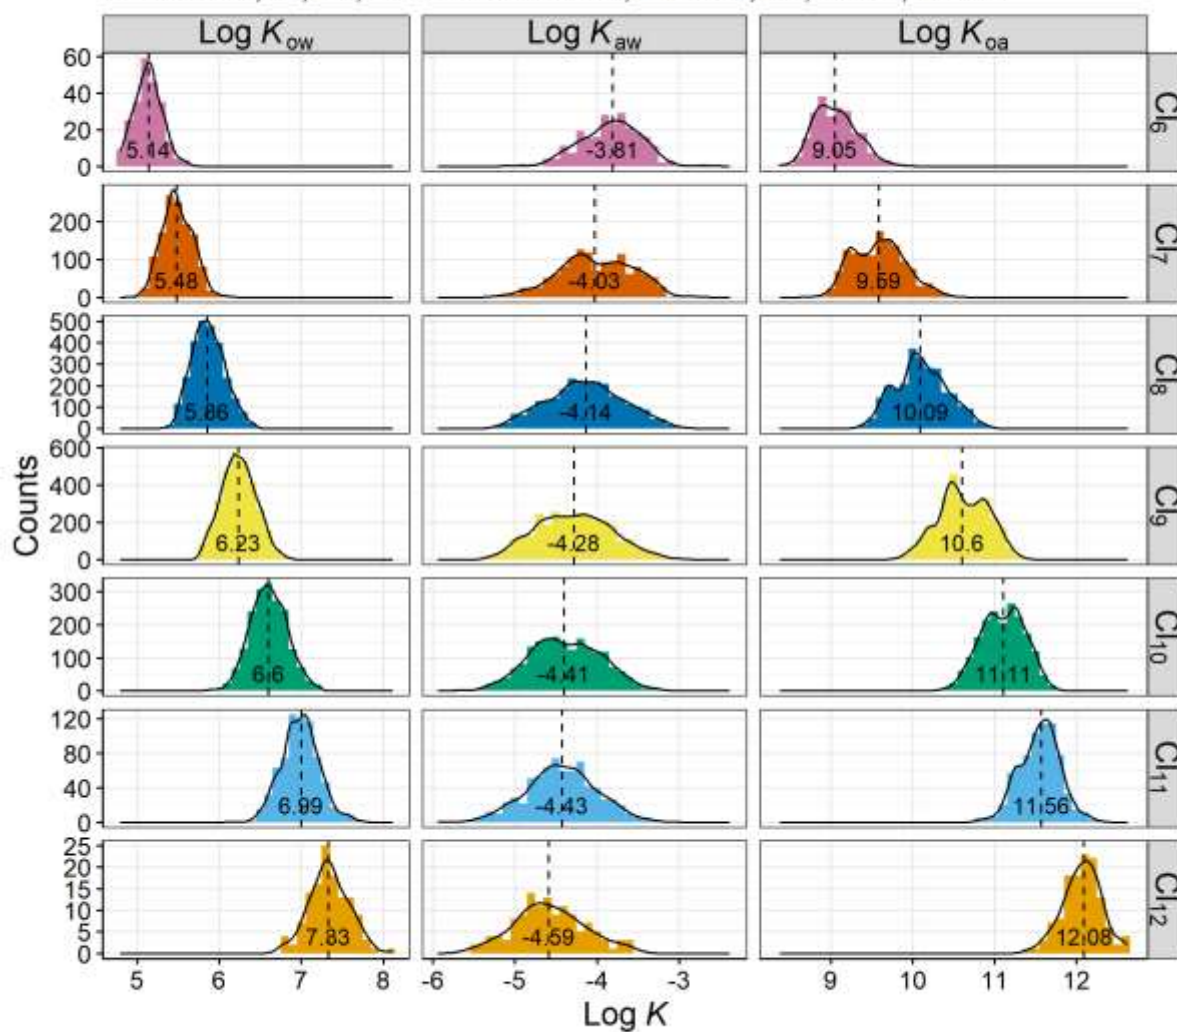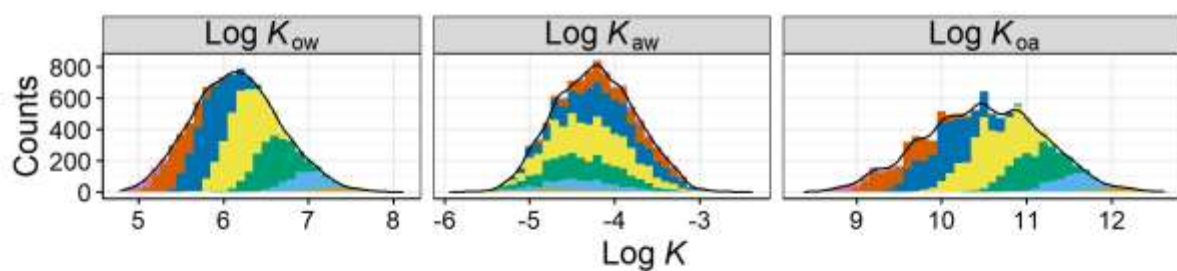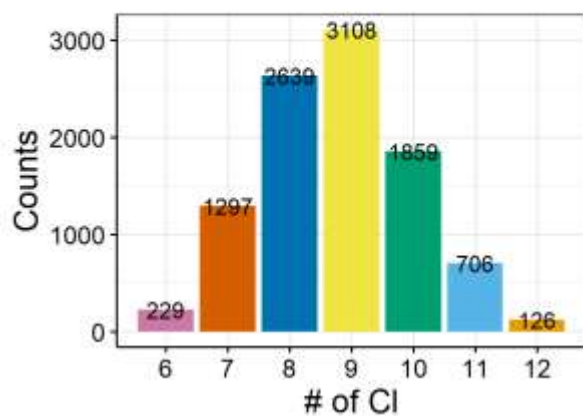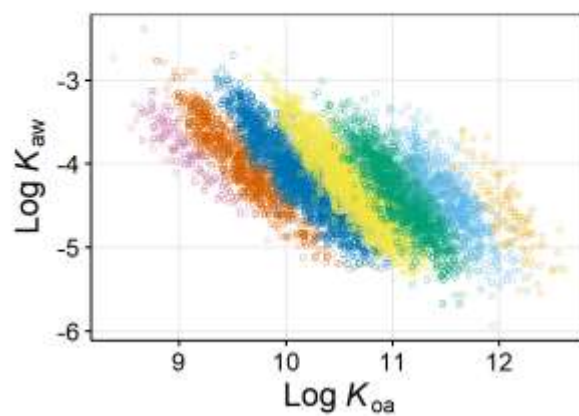



# C<sub>11</sub>, 30 wt% Cl

Total counts, 10,000; <100 counts omitted; bin width, 0.1; values, median

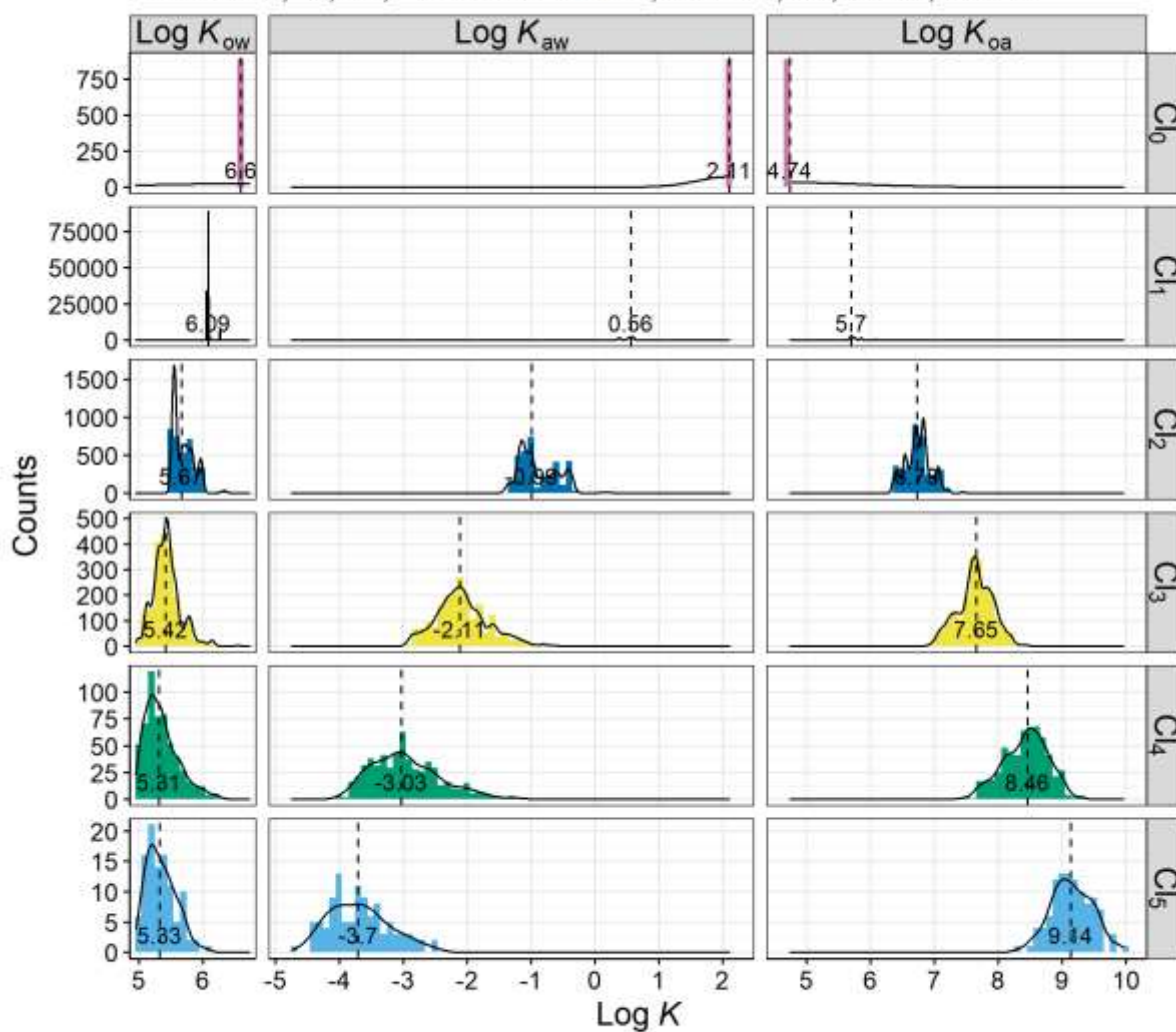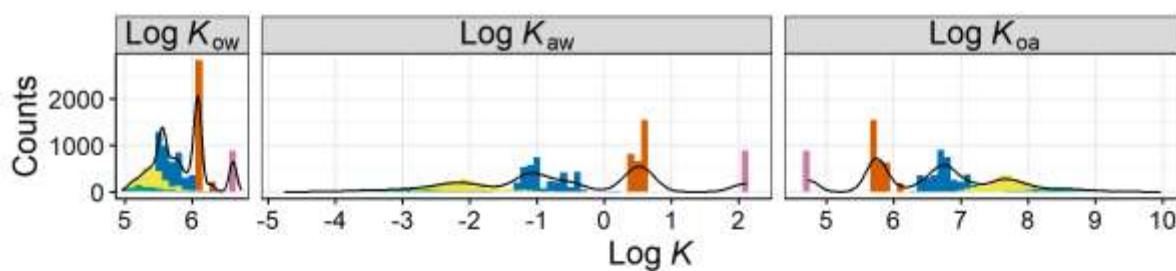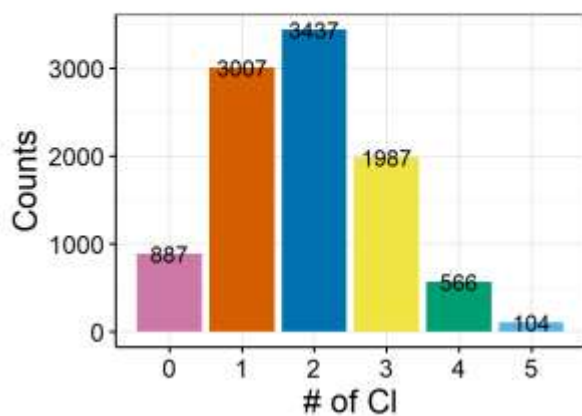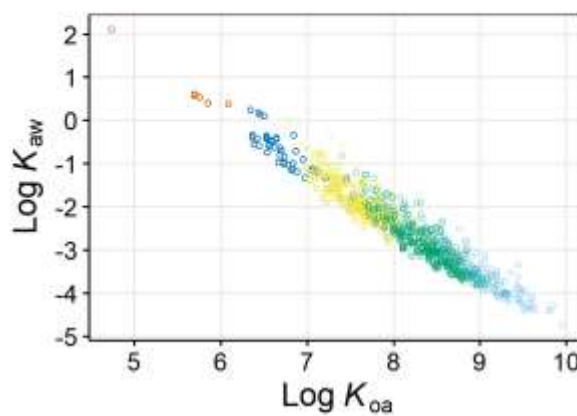

# $C_{11}$ , 40 wt% Cl

Total counts, 10,000; <100 counts omitted; bin width, 0.1; values, median

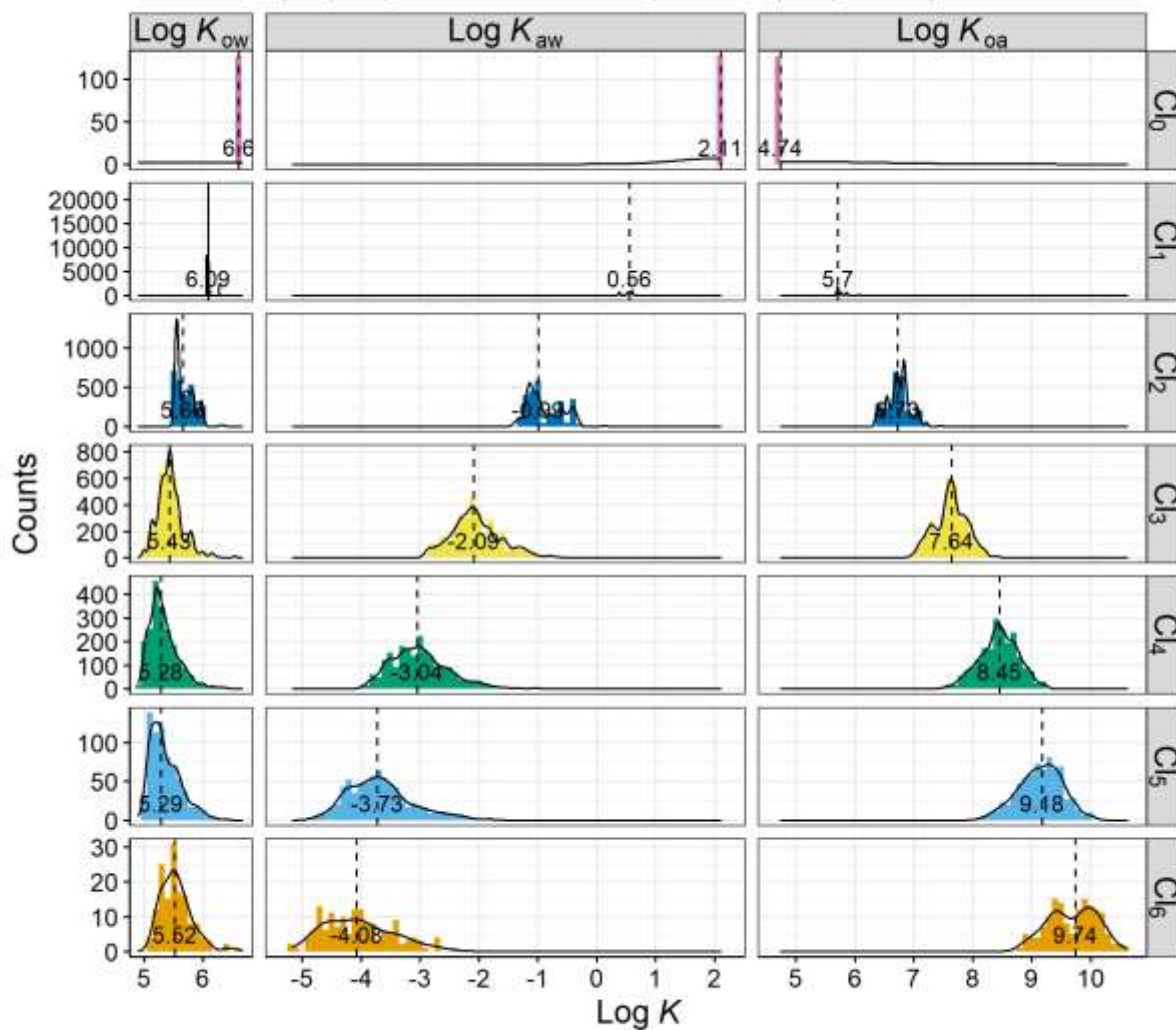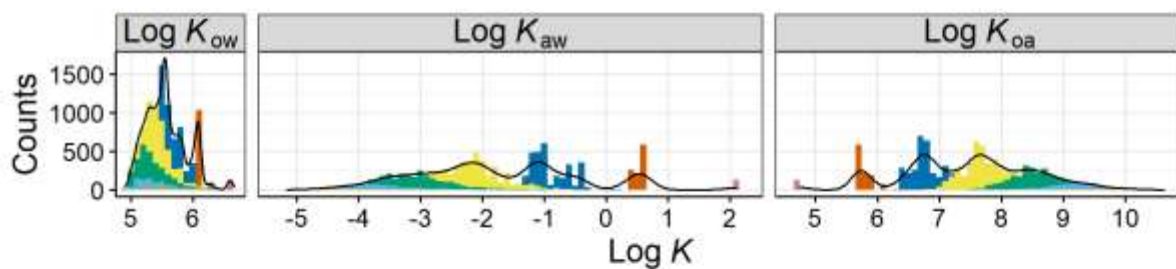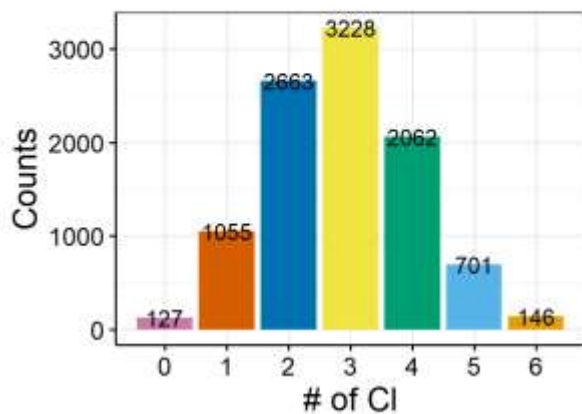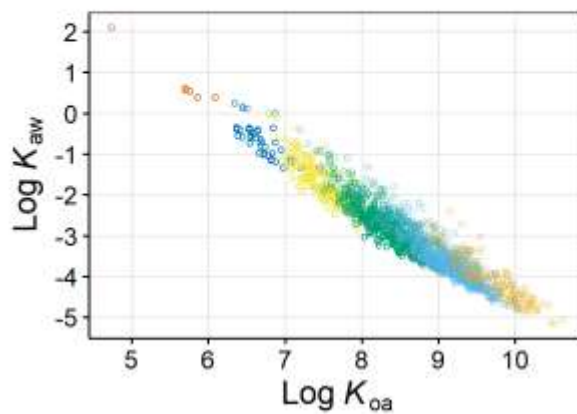

# C<sub>11</sub>, 50 wt% CI

Total counts, 10,000; <100 counts omitted; bin width, 0.1; values, median

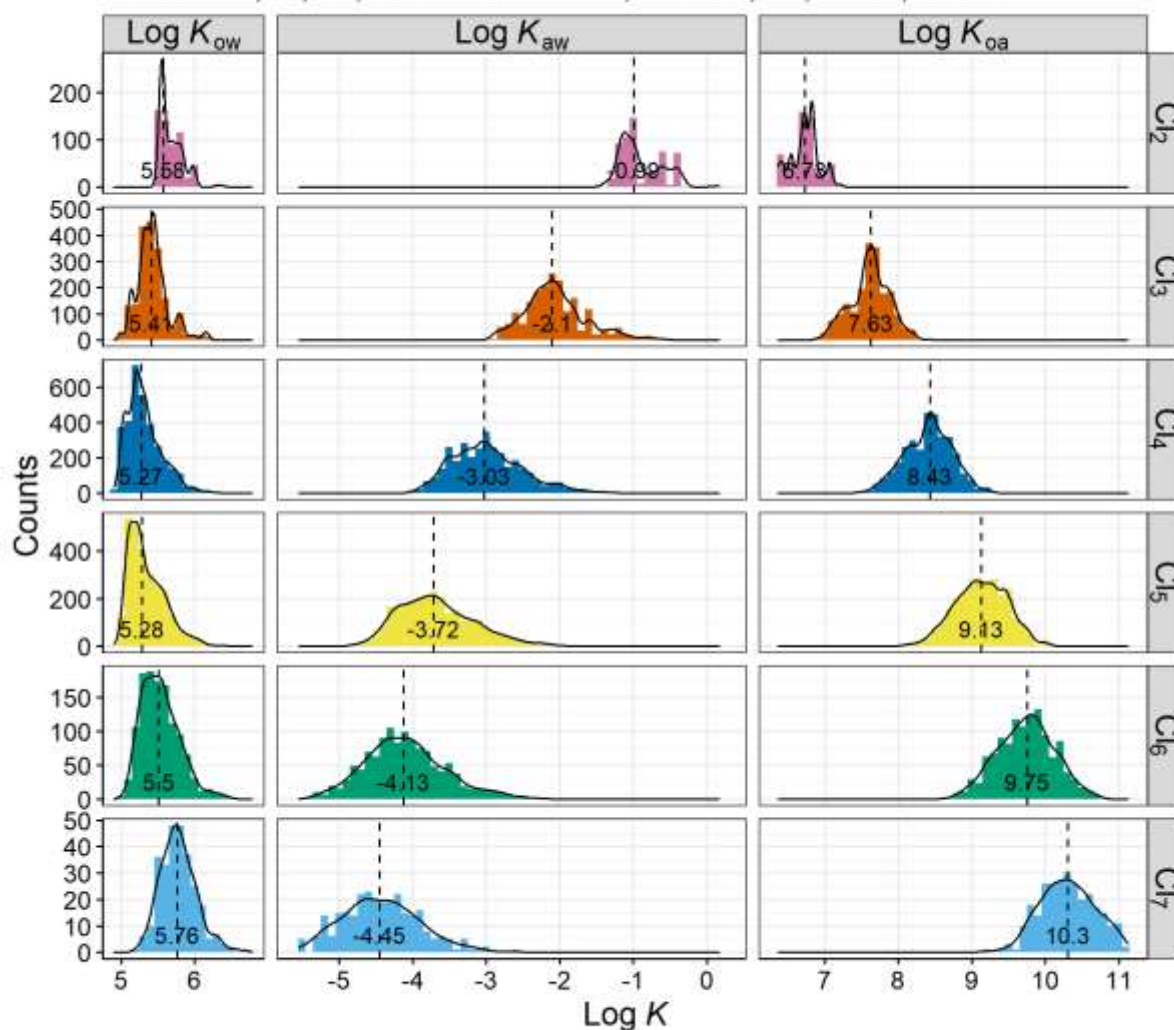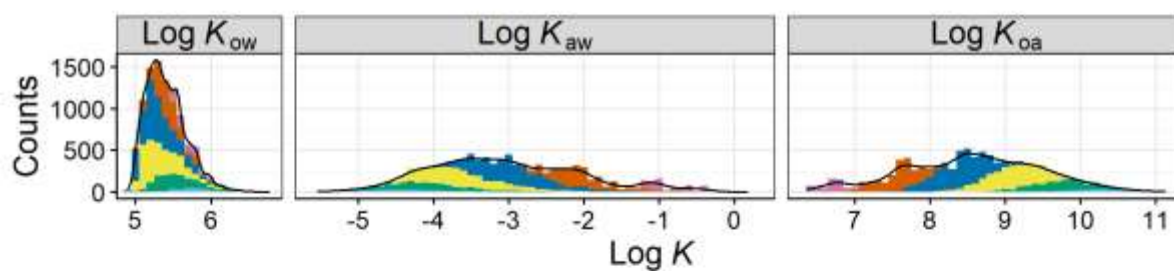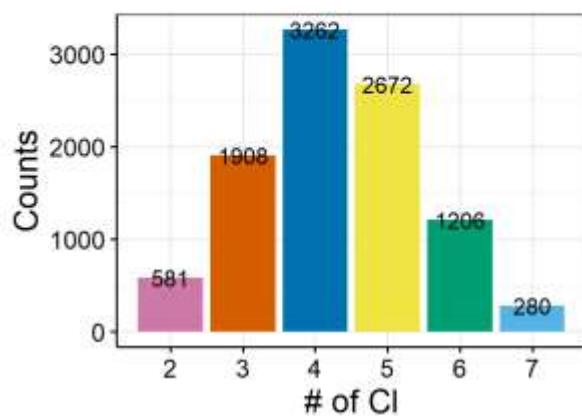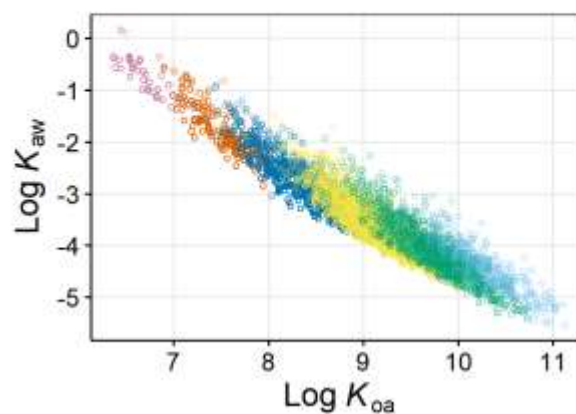



# C<sub>11</sub>, 60 wt% CI

Total counts, 10,000; <100 counts omitted; bin width, 0.1; values, median

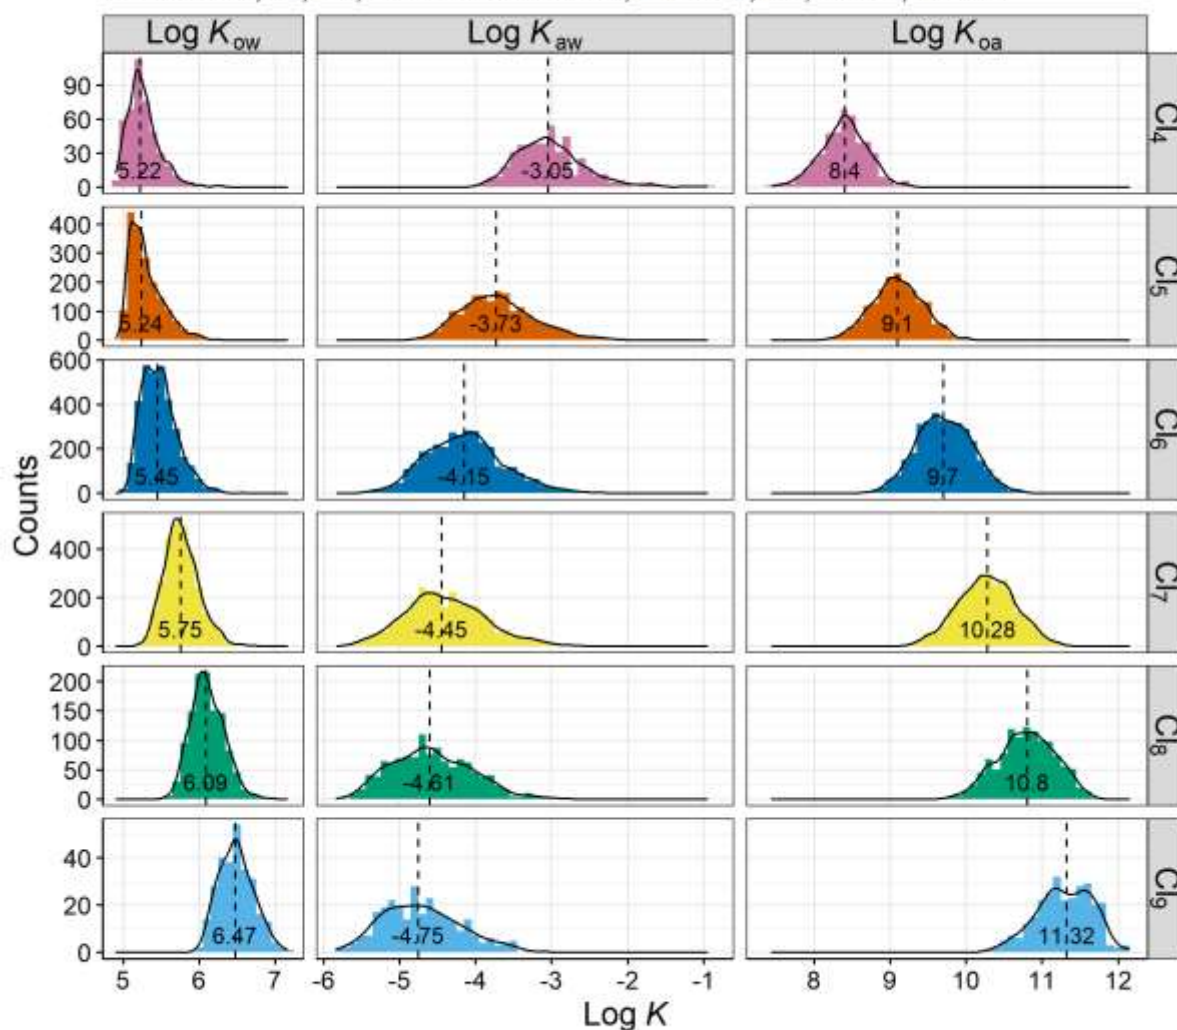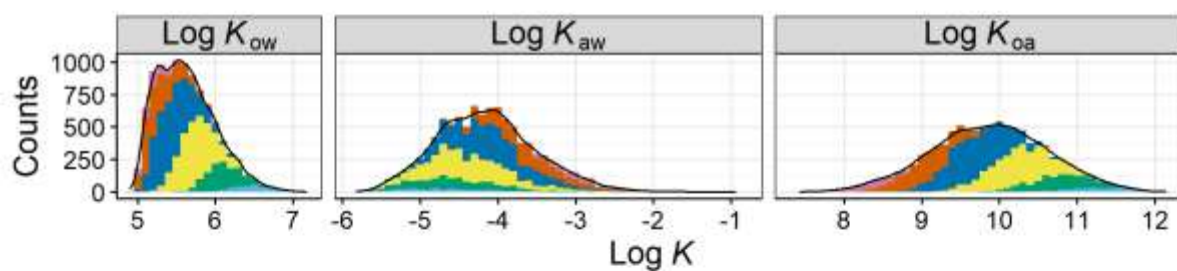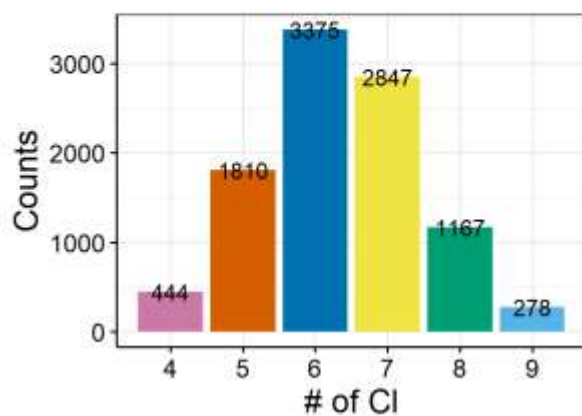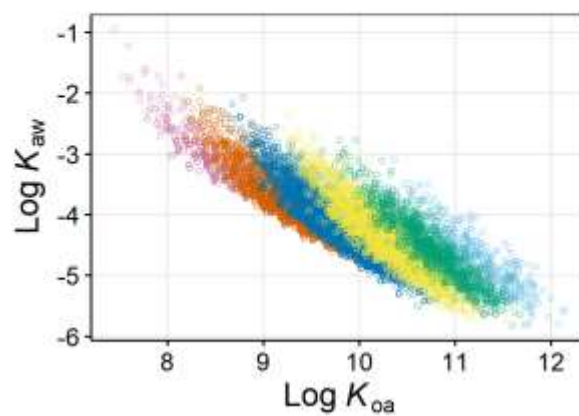



# C<sub>11</sub>, 70 wt% CI

Total counts, 10,000; <100 counts omitted; bin width, 0.1; values, median

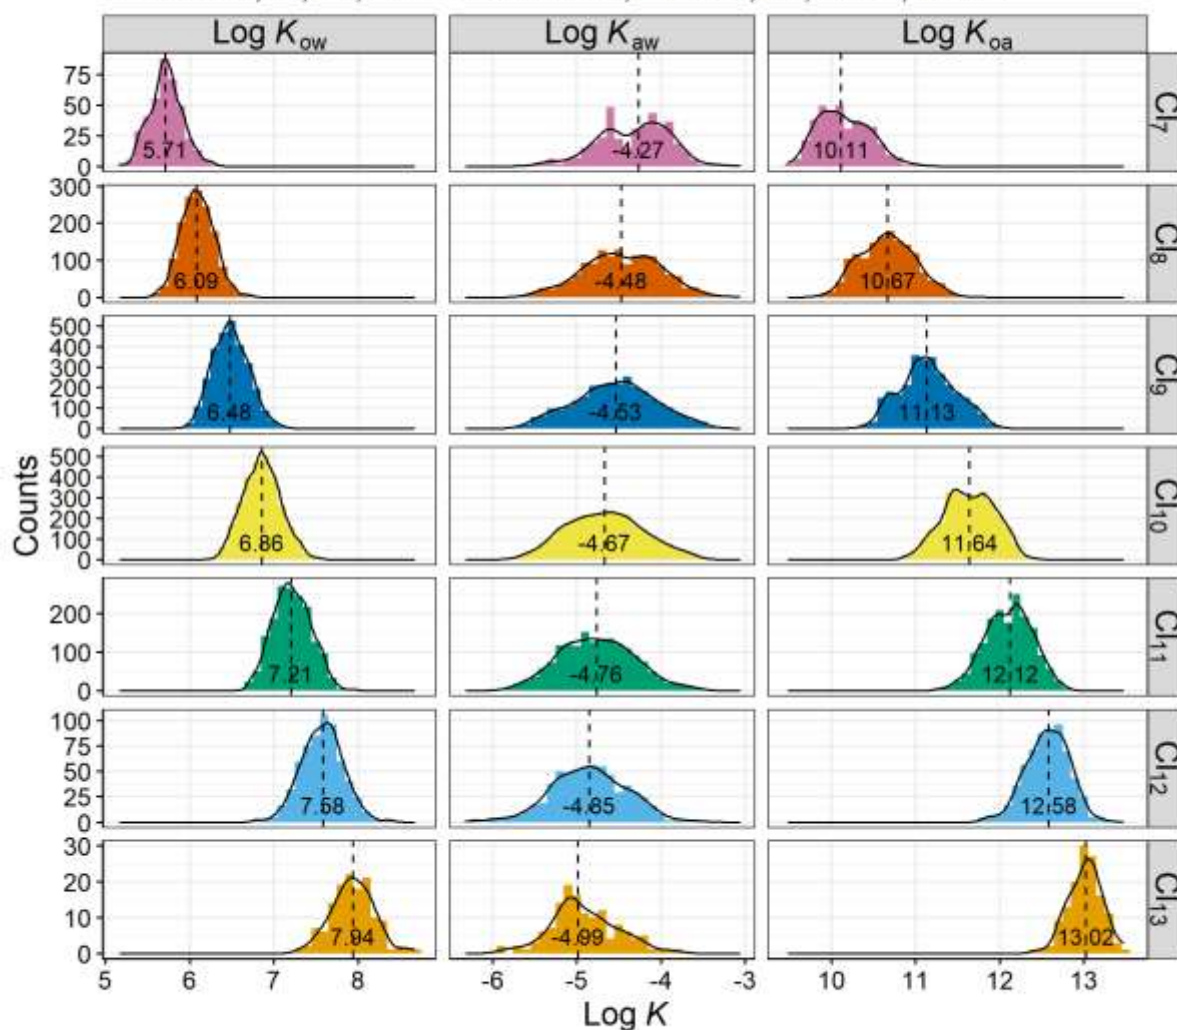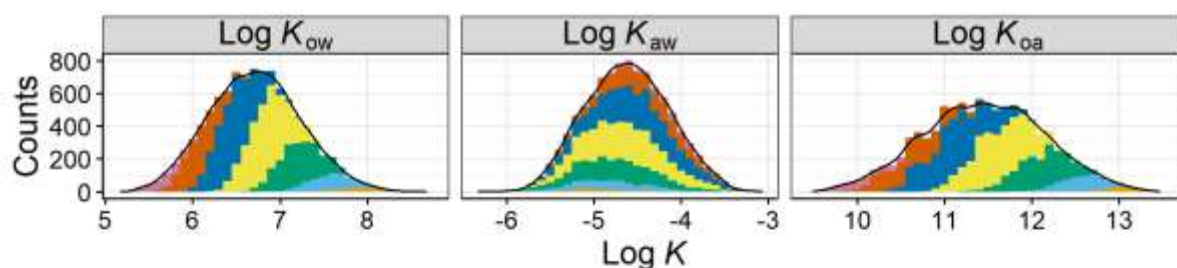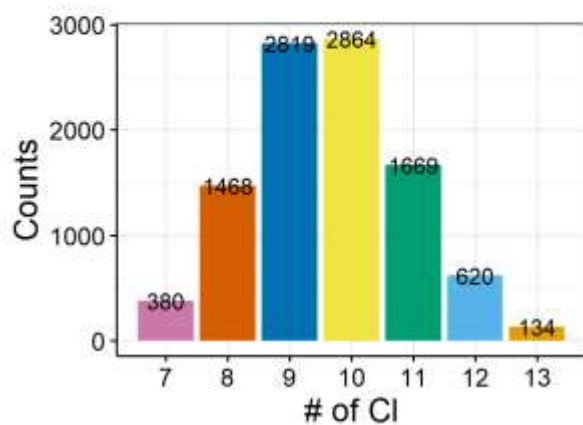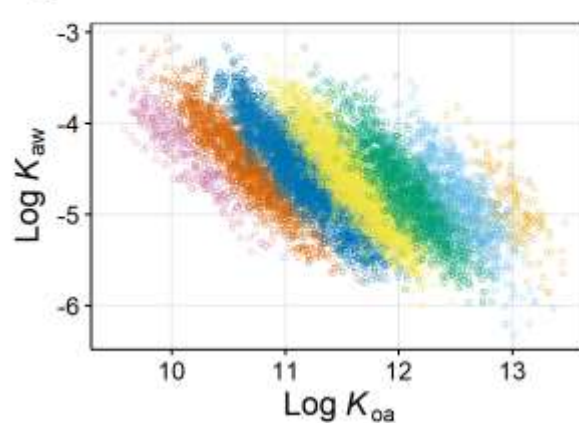

# C<sub>12</sub>, 30 wt% CI

Total counts, 10,000; <100 counts omitted; bin width, 0.1; values, median

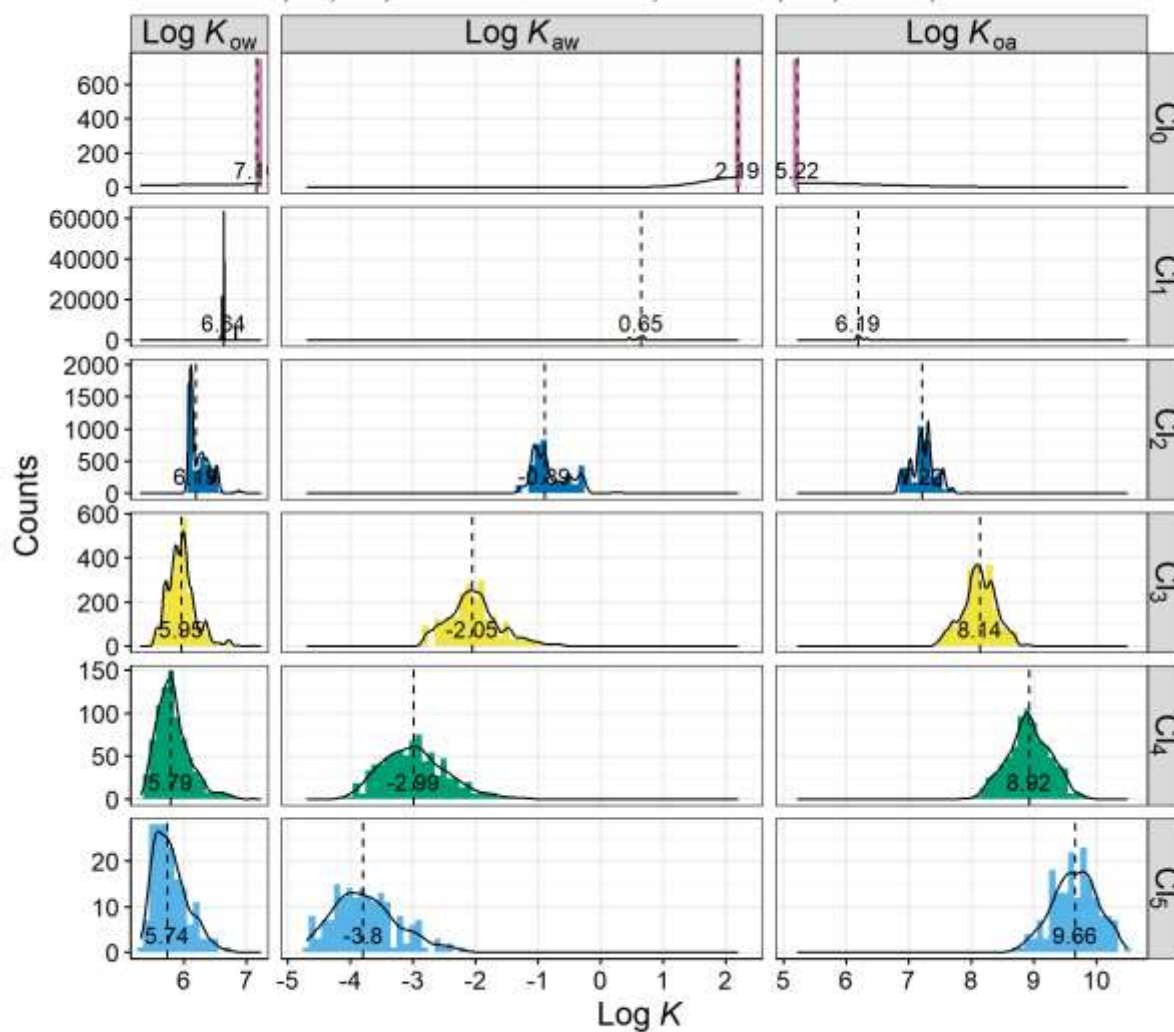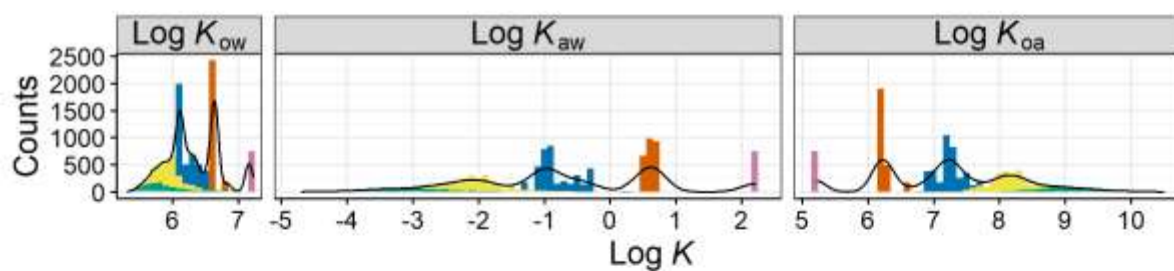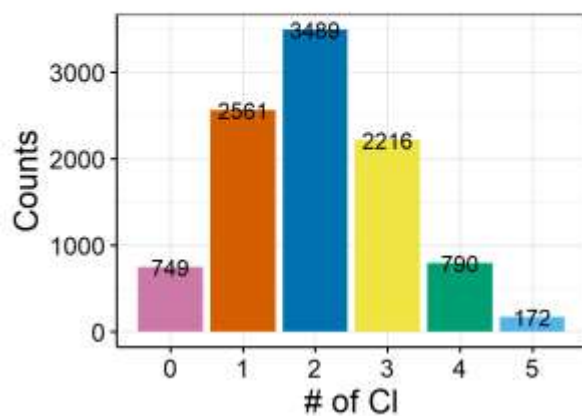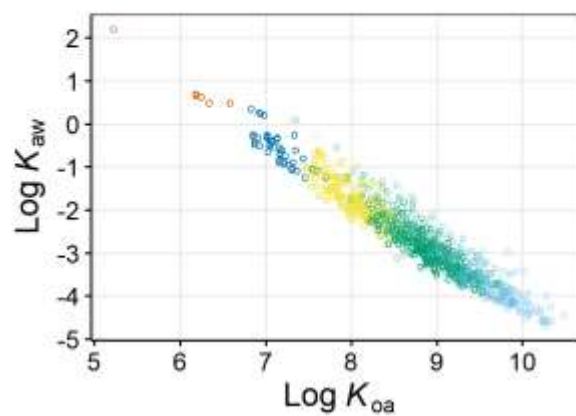

# C<sub>12</sub>, 40 wt% Cl

Total counts, 10,000; <100 counts omitted; bin width, 0.1; values, median

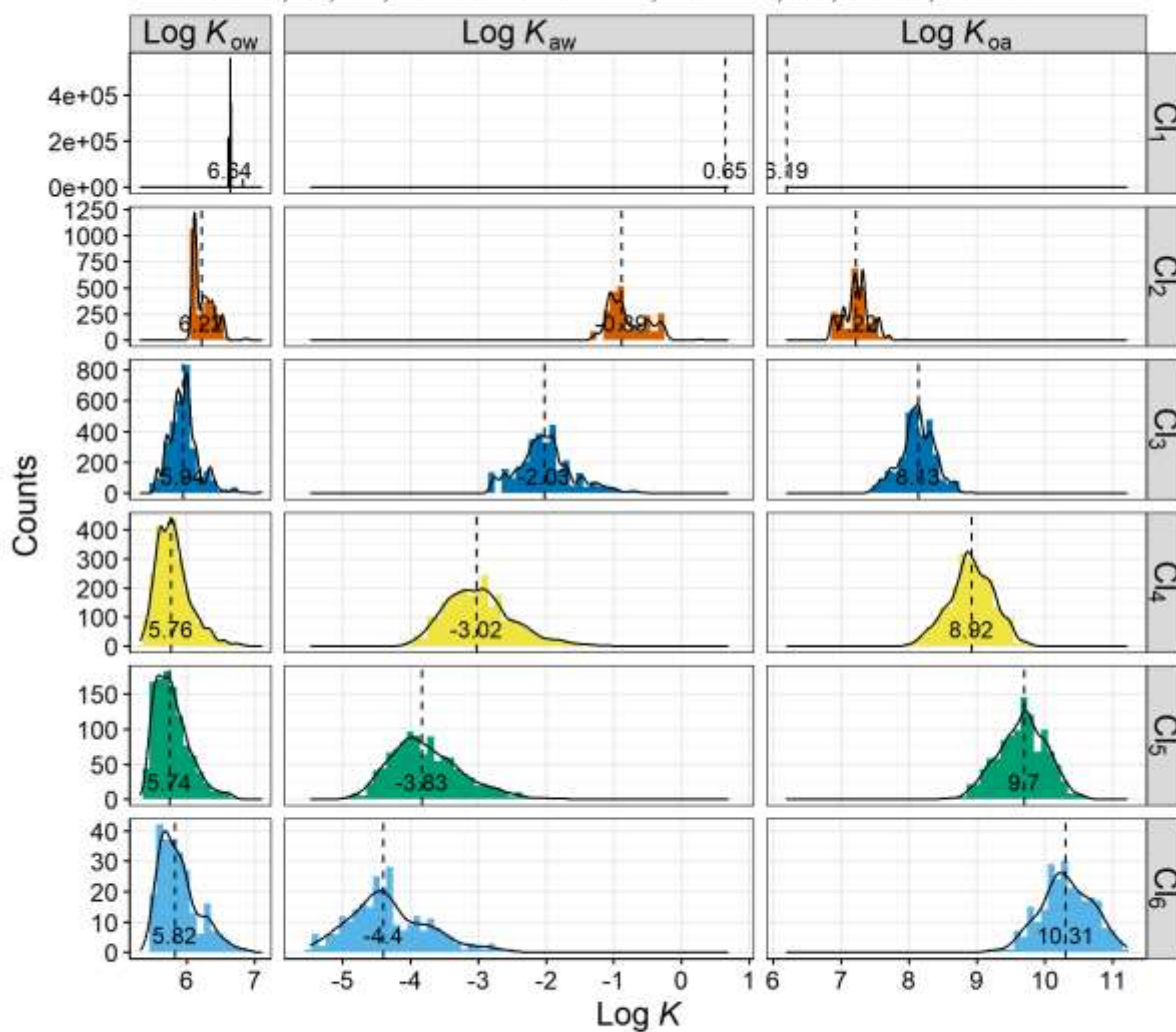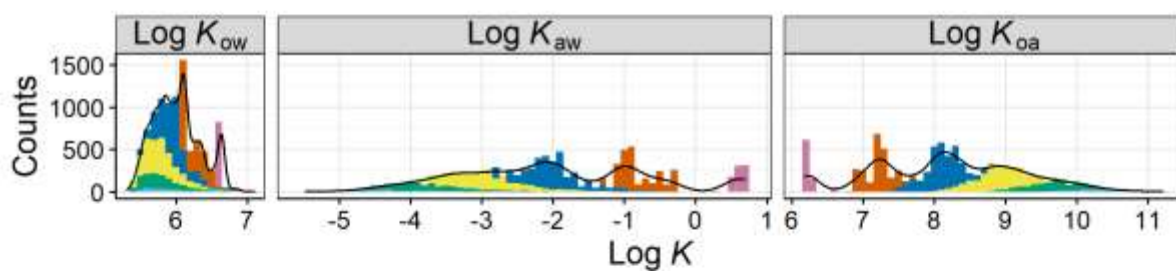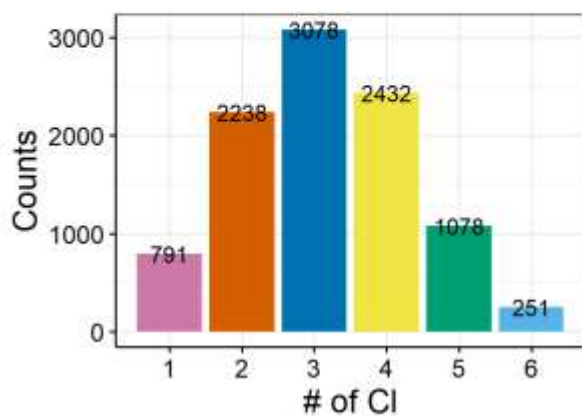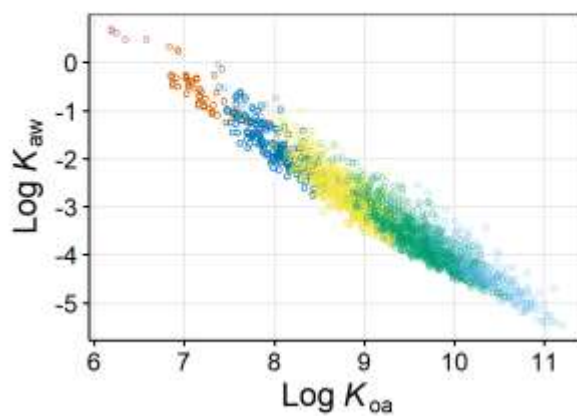



# C<sub>12</sub>, 50 wt% CI

Total counts, 10,000; <100 counts omitted; bin width, 0.1; values, median

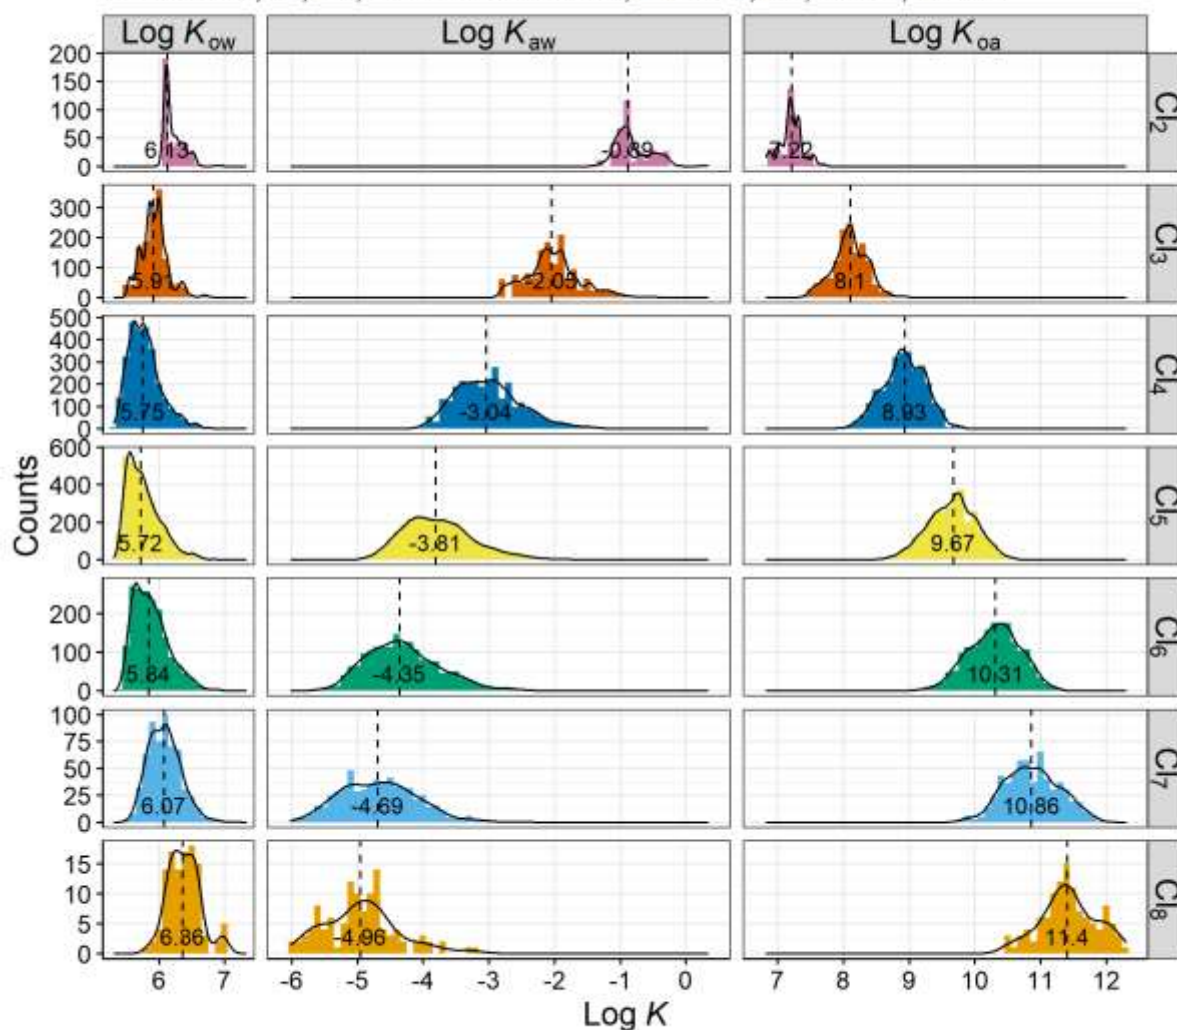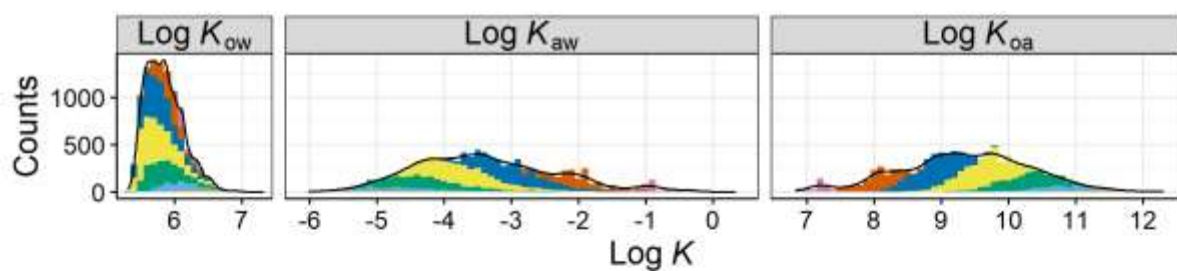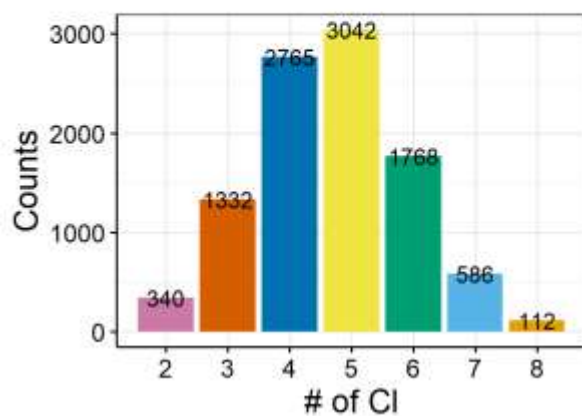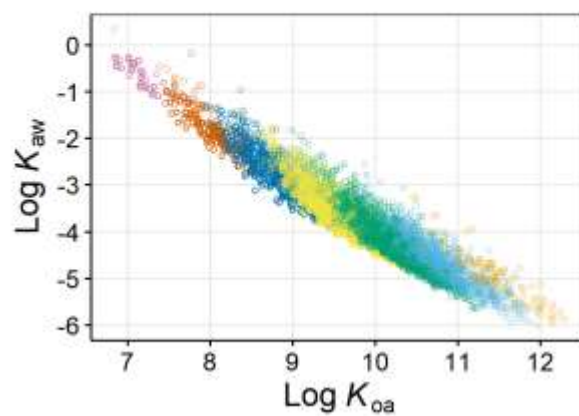

# C<sub>12</sub>, 60 wt% CI

Total counts, 10,000; <100 counts omitted; bin width, 0.1; values, median

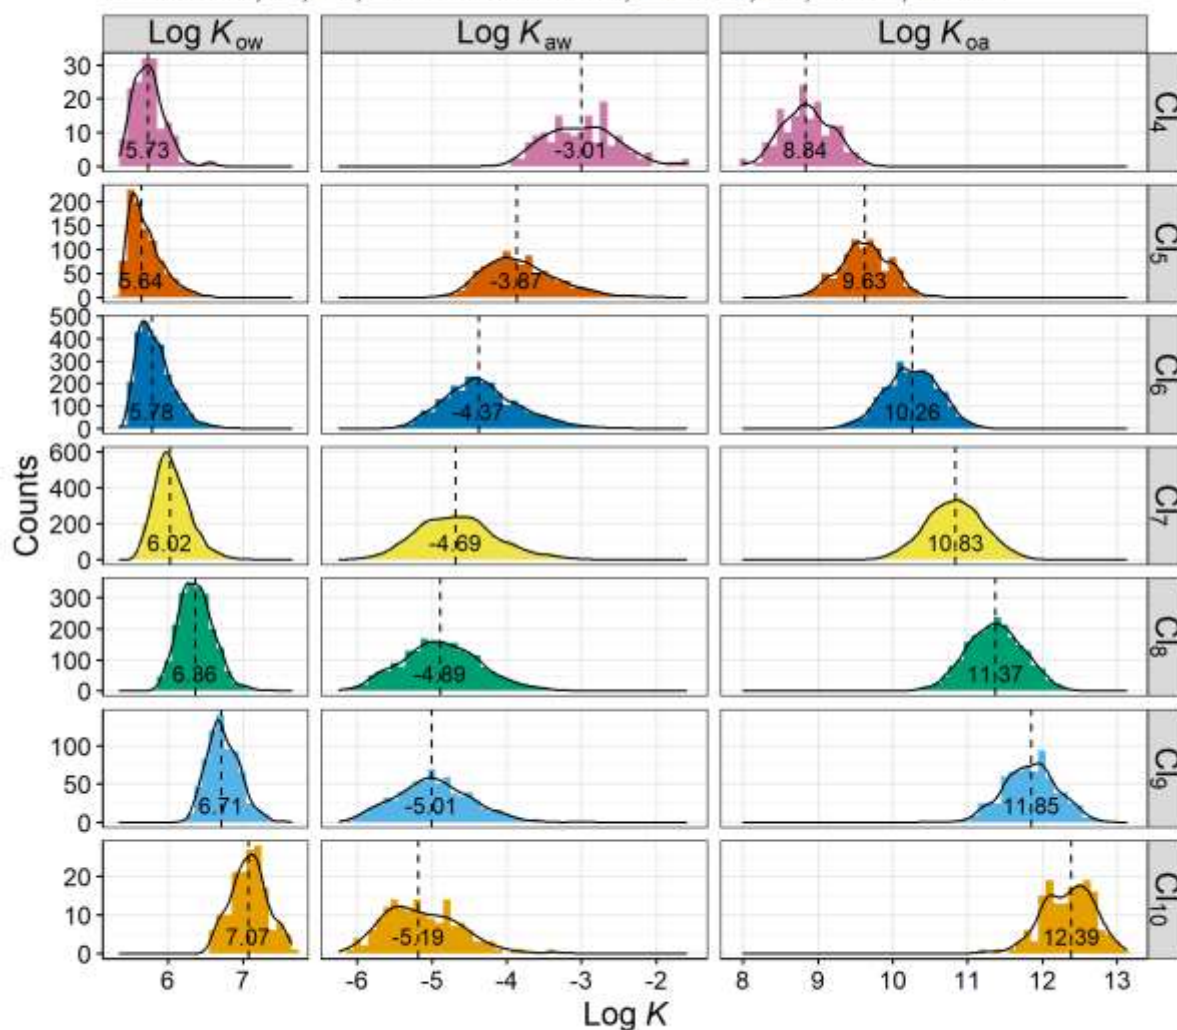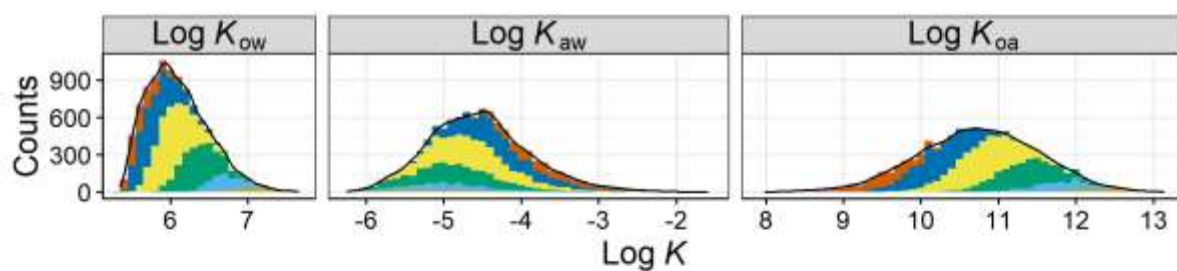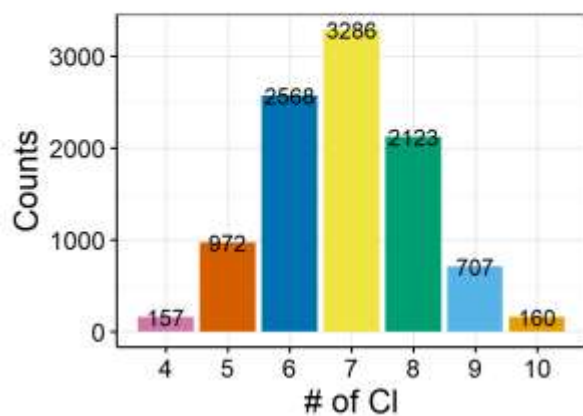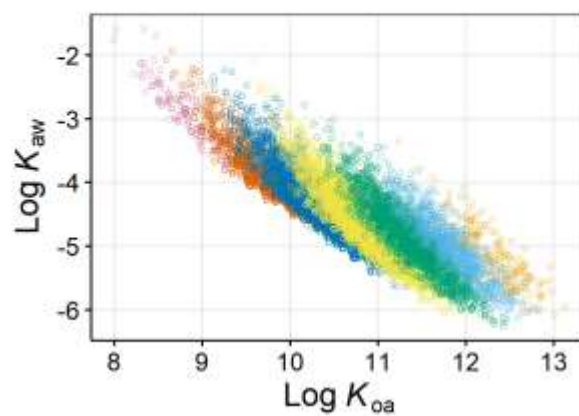

## C<sub>12</sub>, 70 wt% CI

Total counts, 10,000; <100 counts omitted; bin width, 0.1; values, median

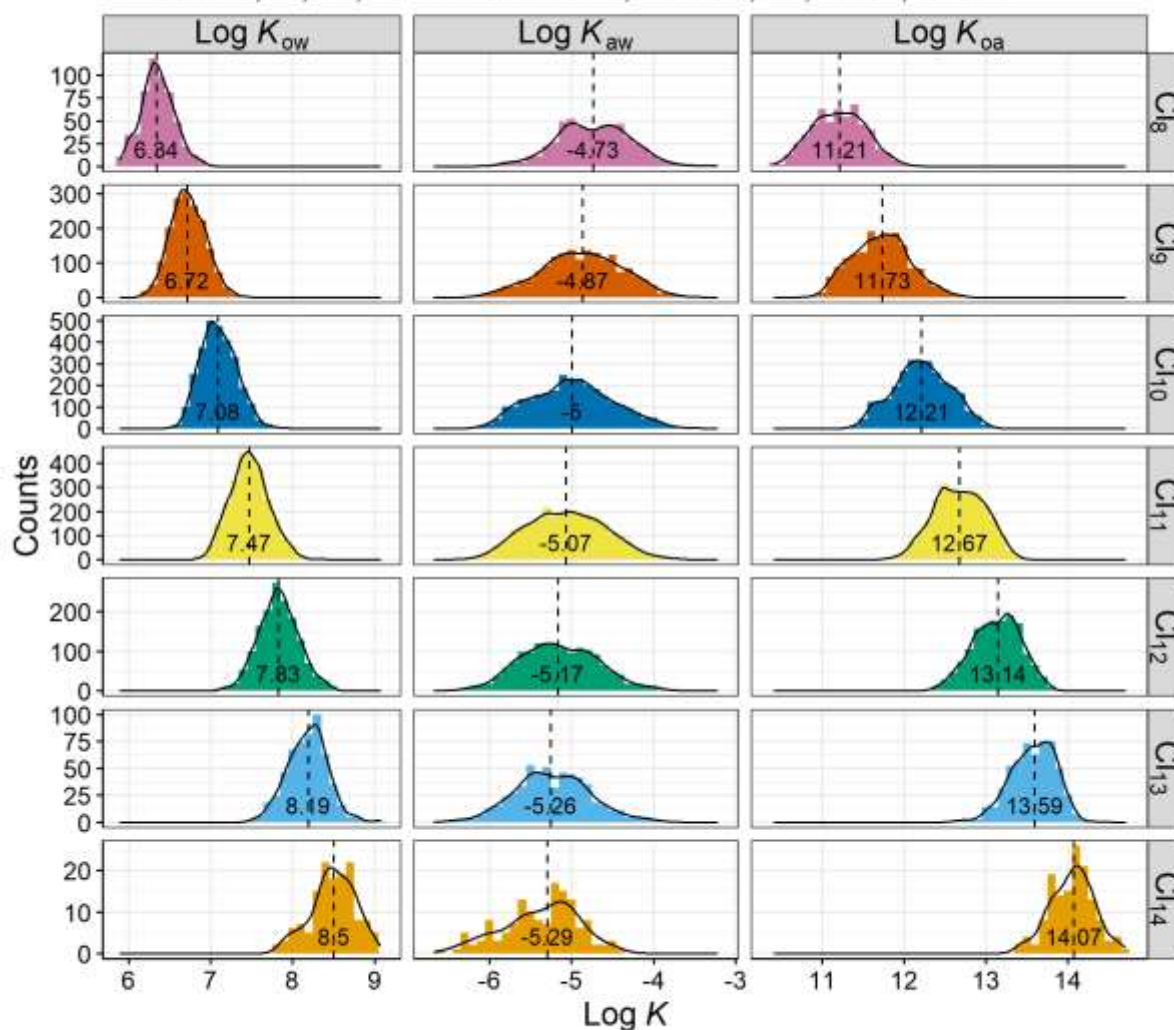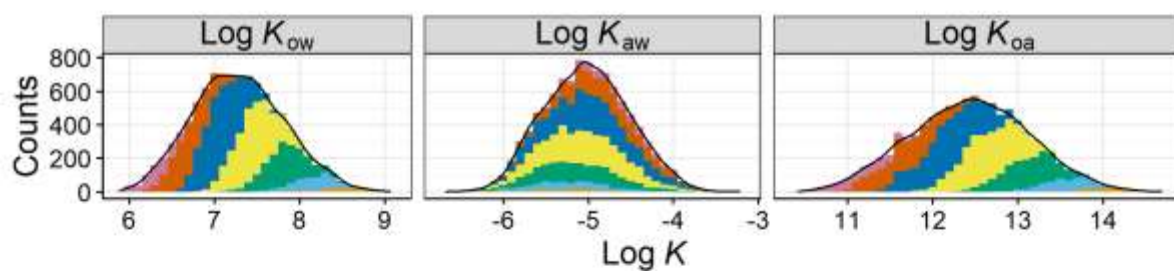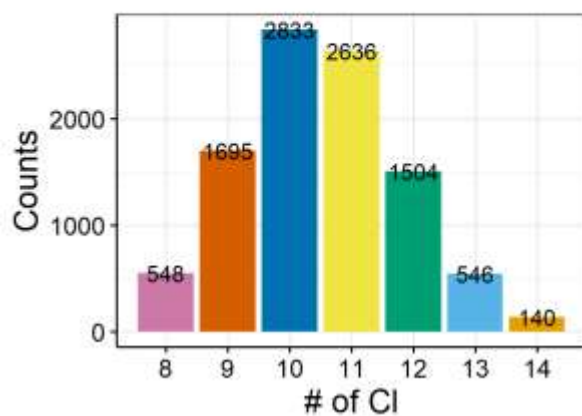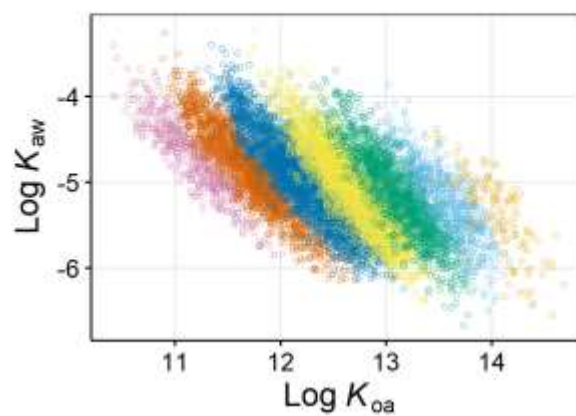



# $C_{13}$ , 30 wt% CI

Total counts, 10,000; <100 counts omitted; bin width, 0.1; values, median

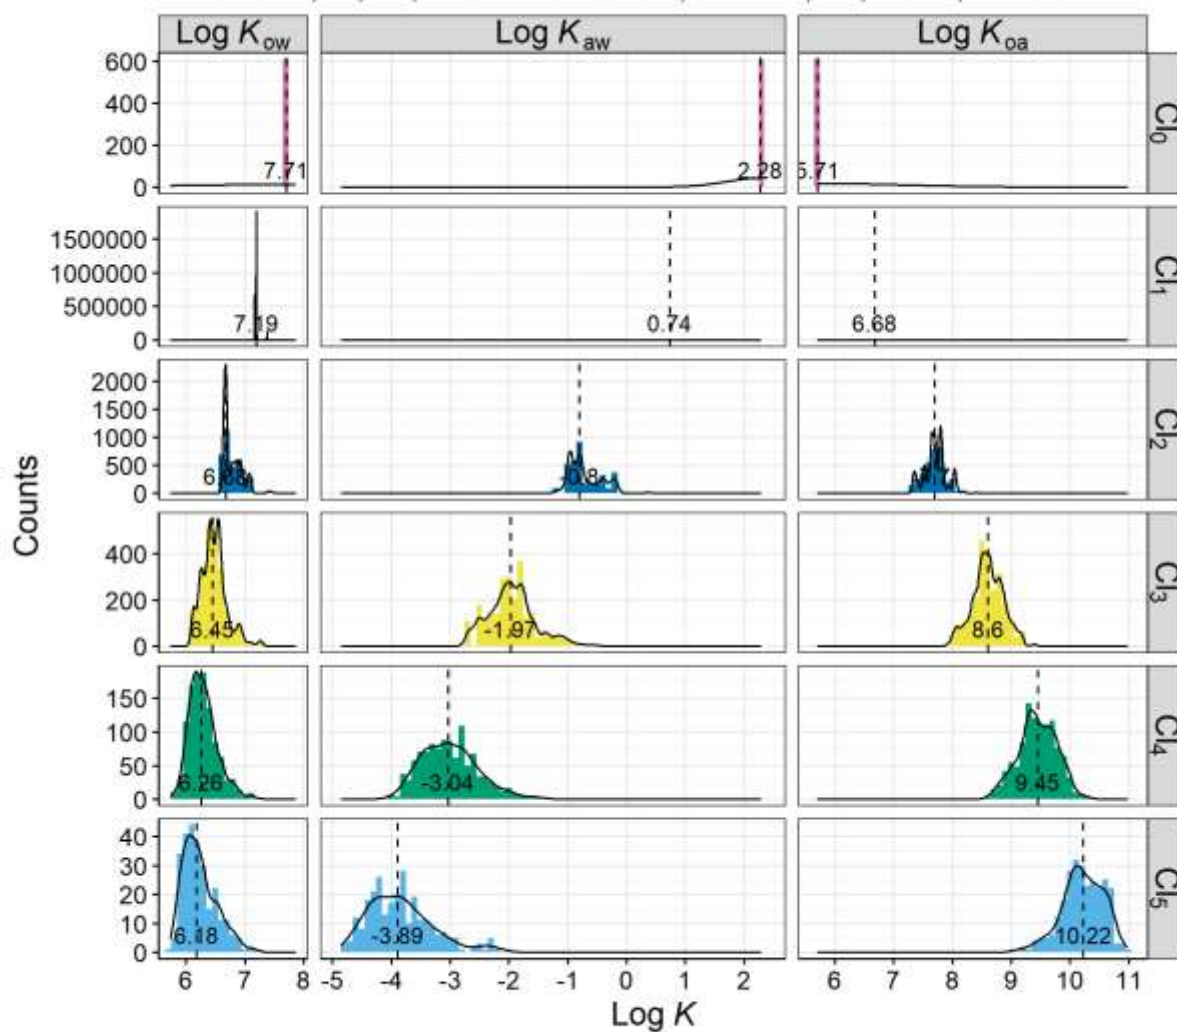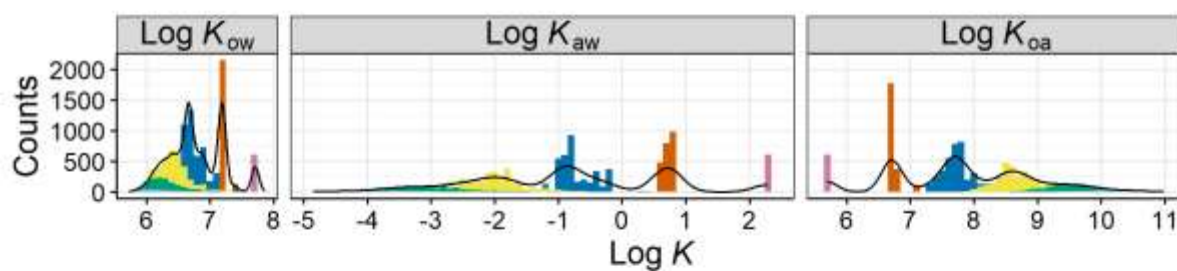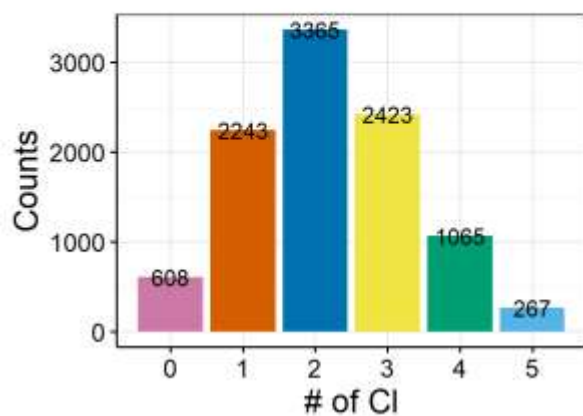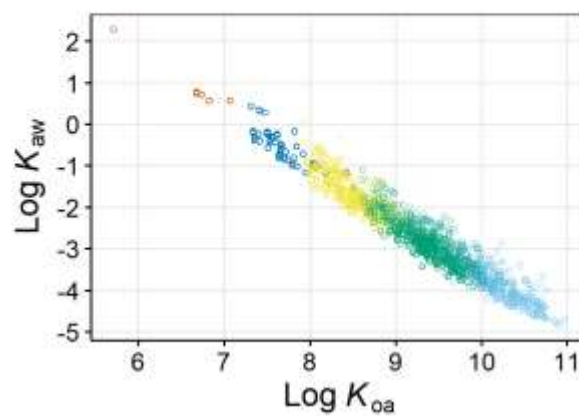



# C<sub>13</sub>, 40 wt% CI

Total counts, 10,000; <100 counts omitted; bin width, 0.1; values, median

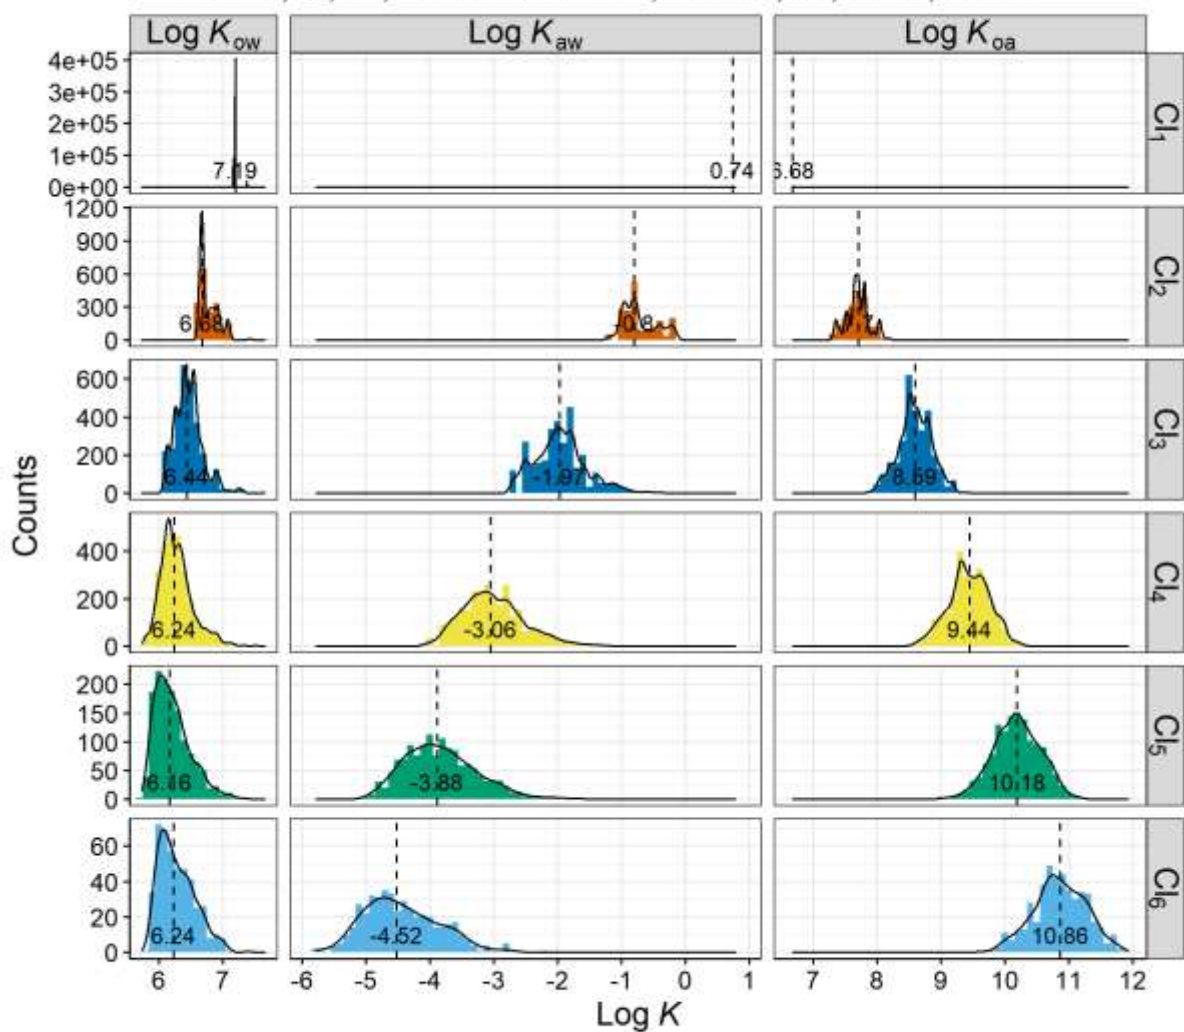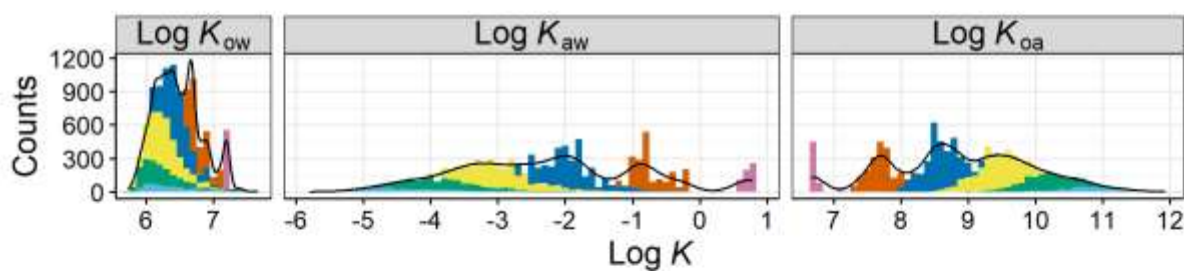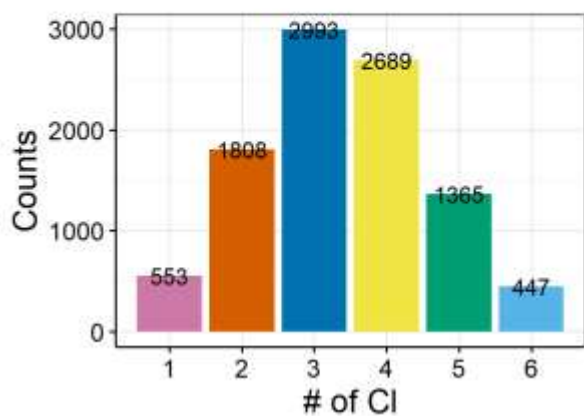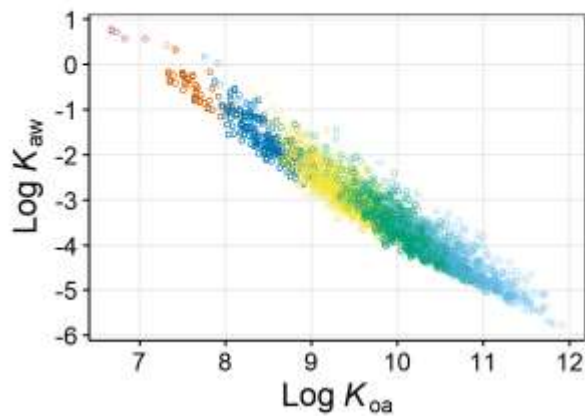

# C<sub>13</sub>, 50 wt% Cl

Total counts, 10,000; <100 counts omitted; bin width, 0.1; values, median

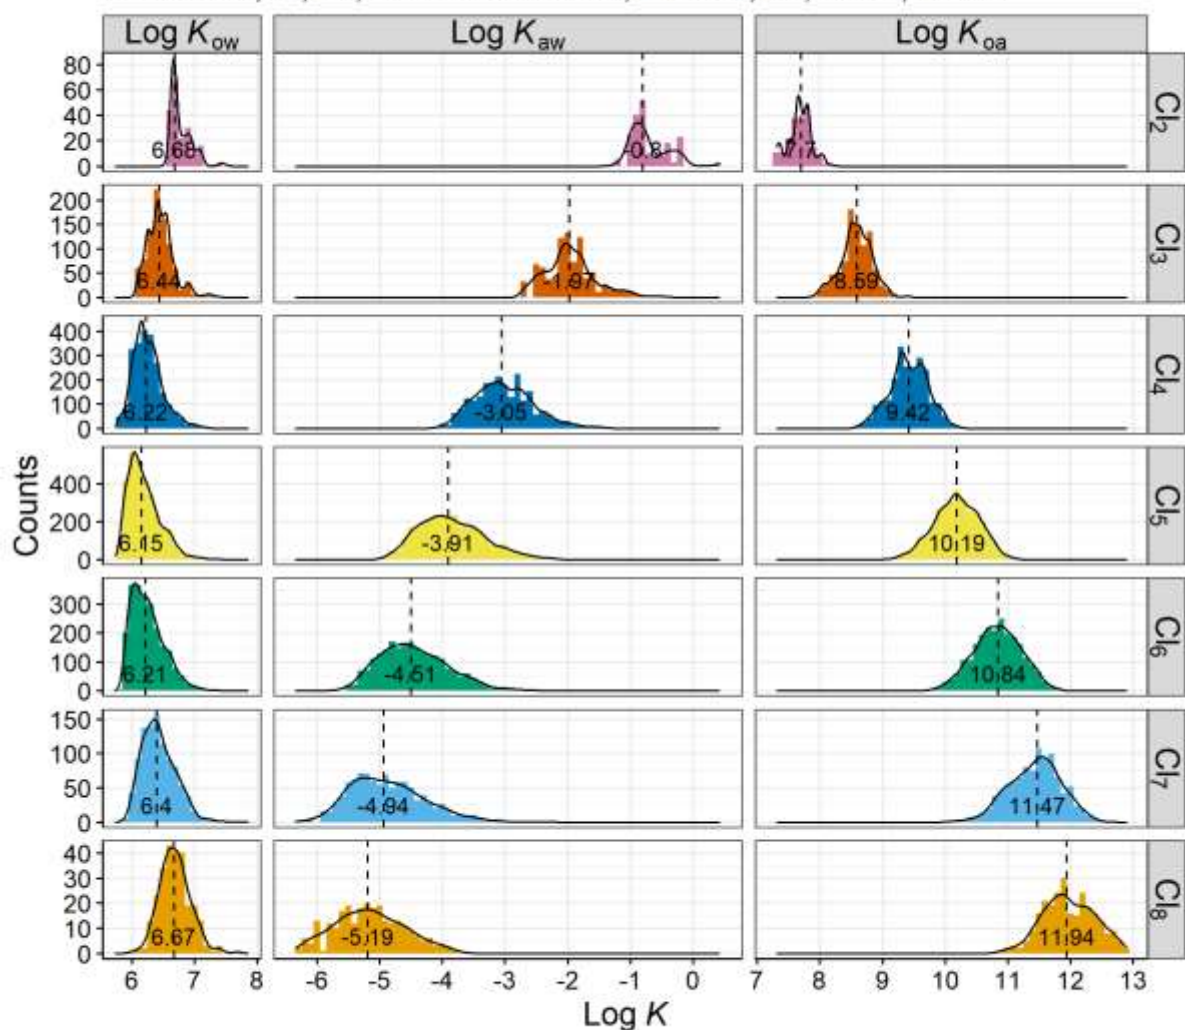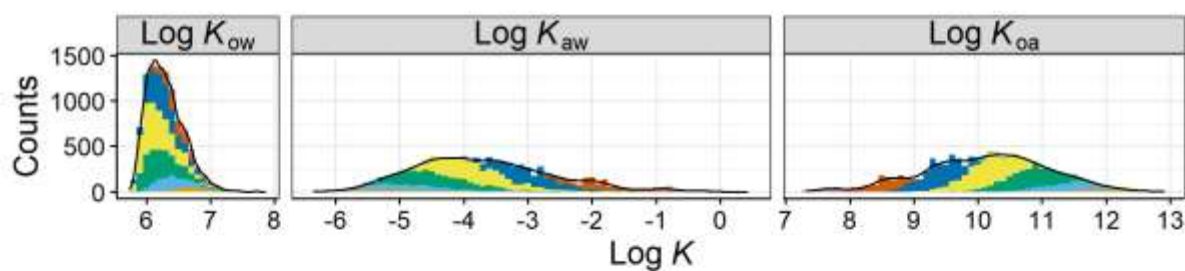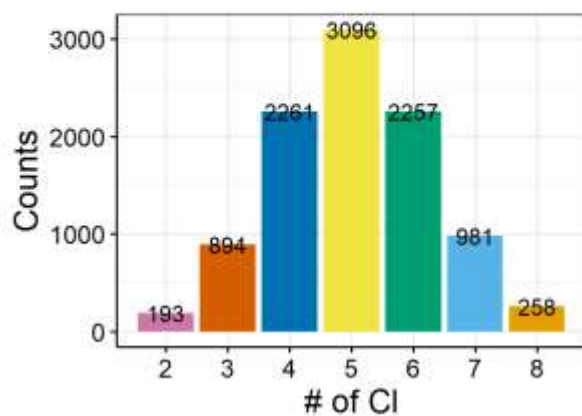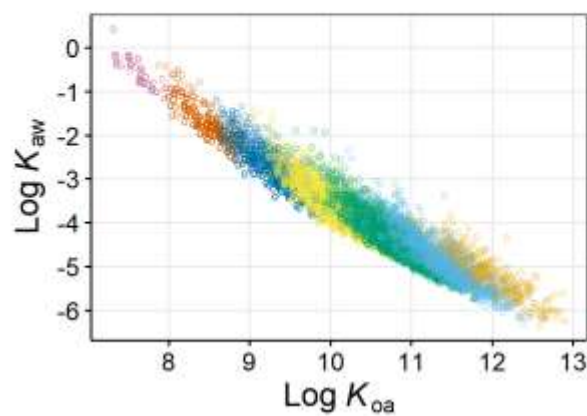

# C<sub>13</sub>, 60 wt% CI

Total counts, 10,000; <100 counts omitted; bin width, 0.1; values, median

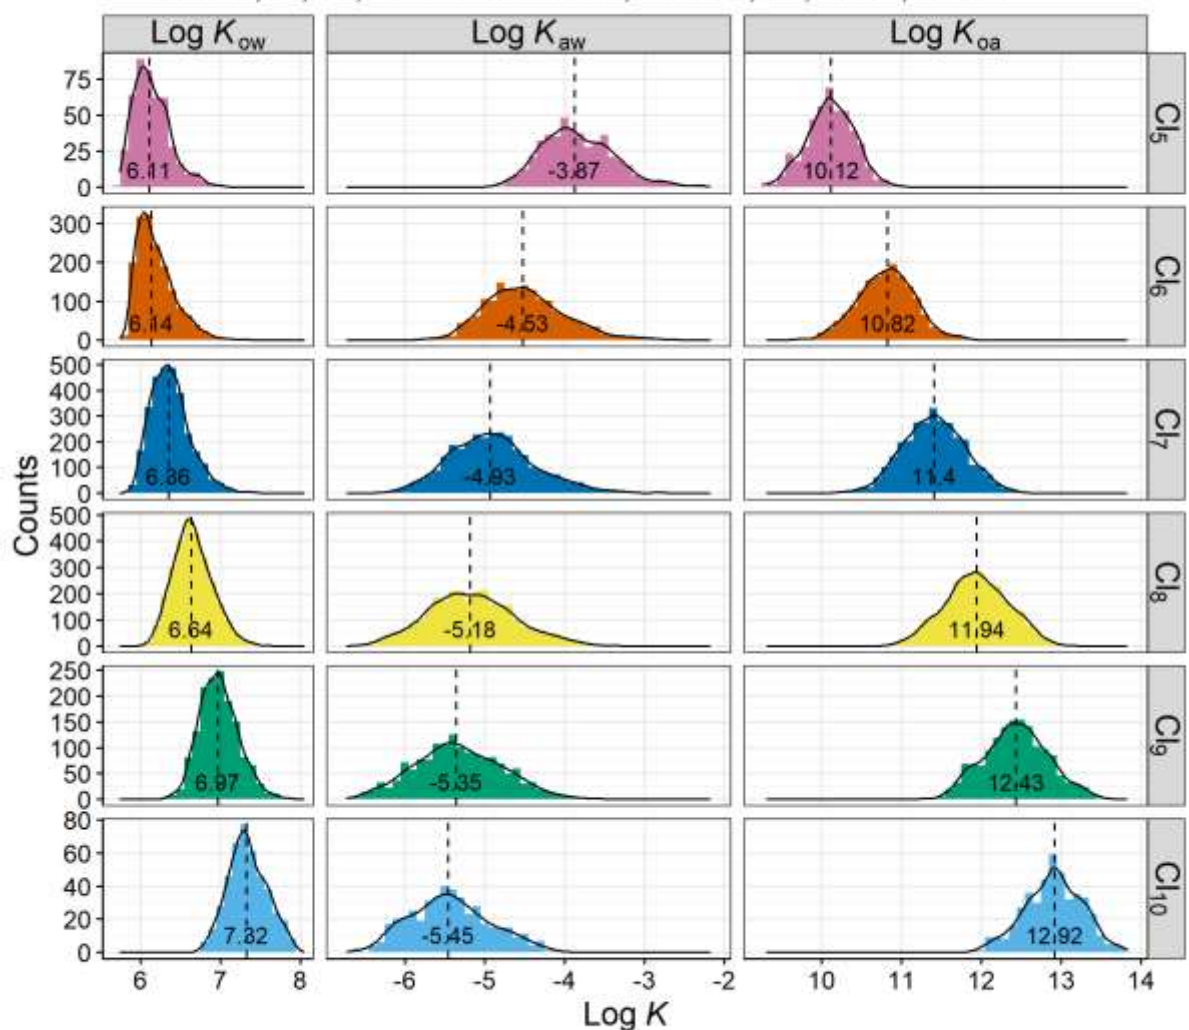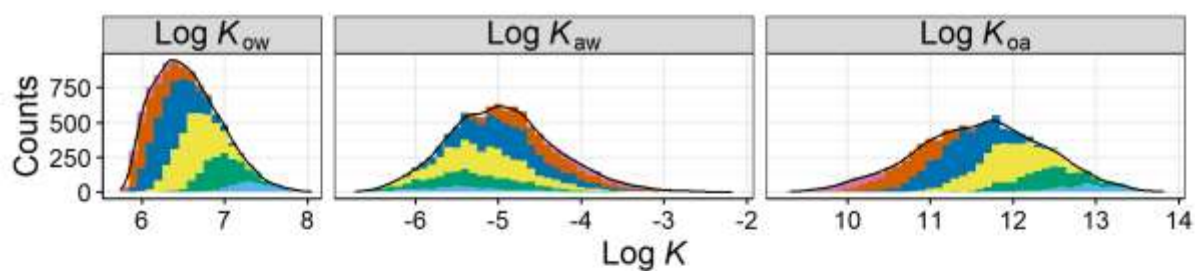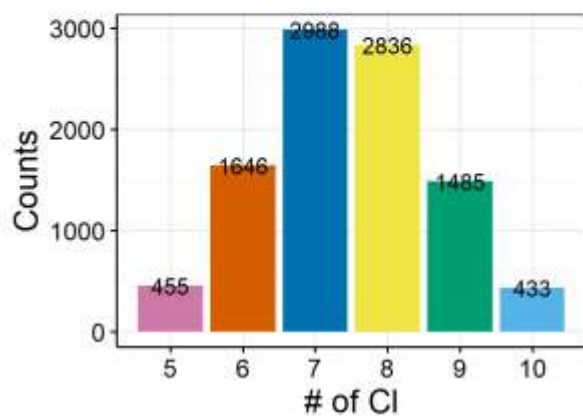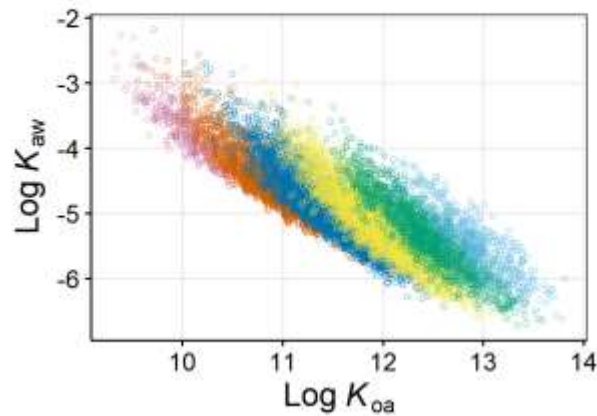



# C<sub>13</sub>, 70 wt% Cl

Total counts, 10,000; <100 counts omitted; bin width, 0.1; values, median

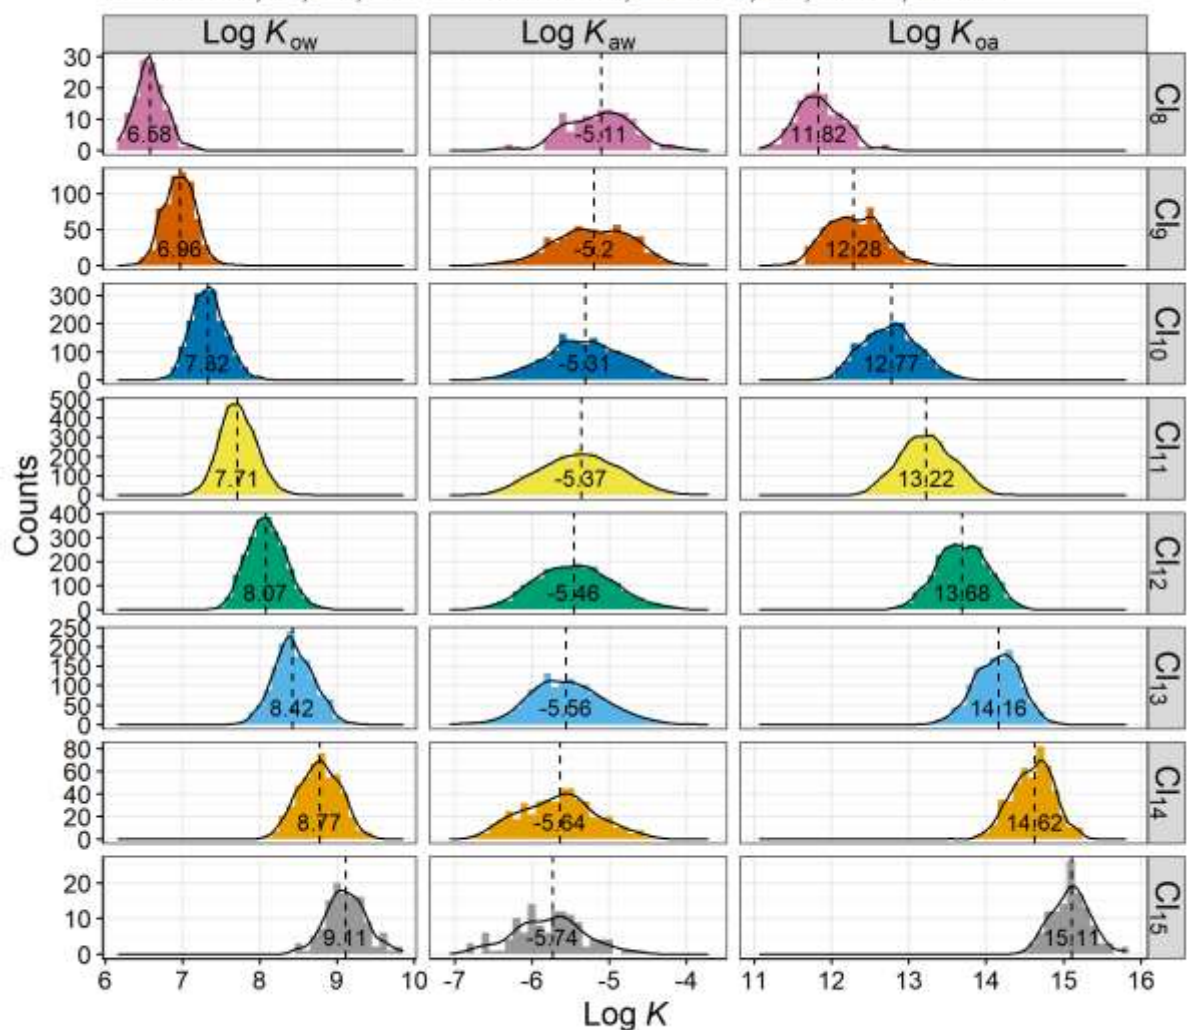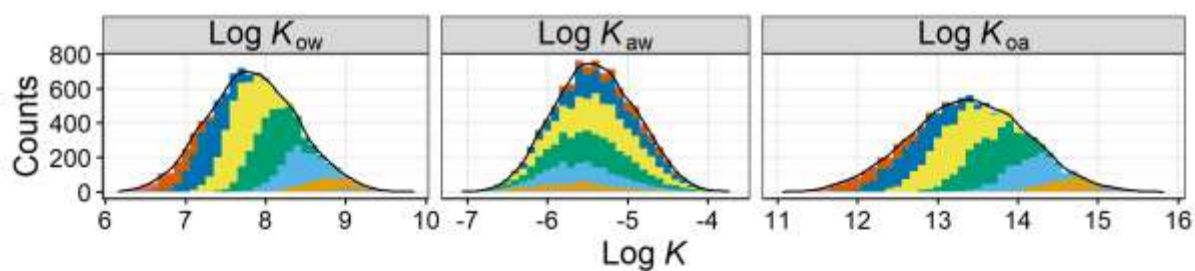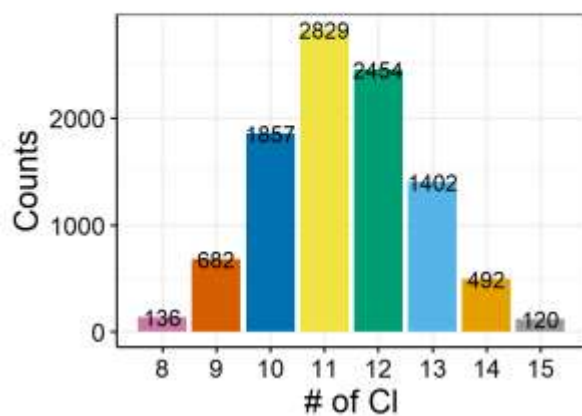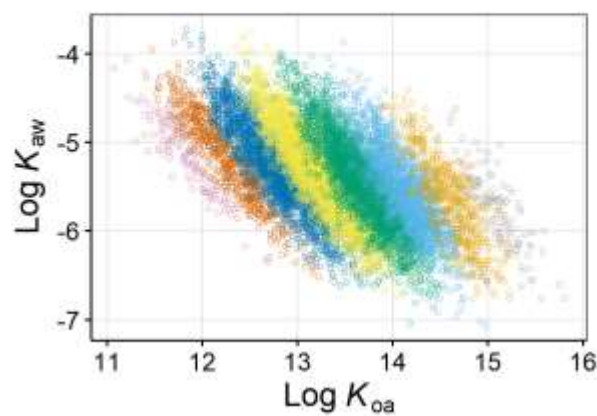

# C<sub>14</sub>, 30 wt% Cl

Total counts, 10,000; <100 counts omitted; bin width, 0.1; values, median

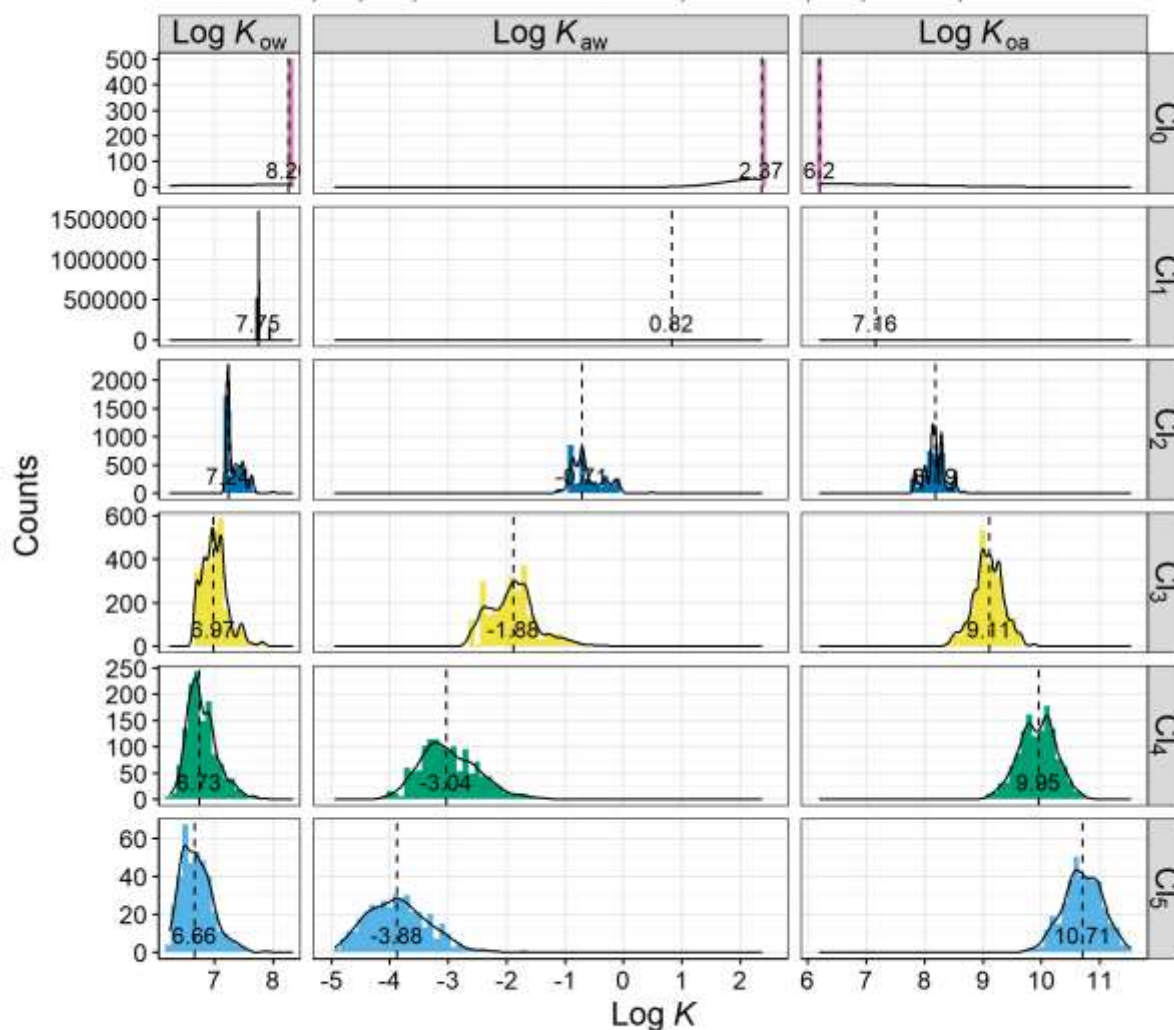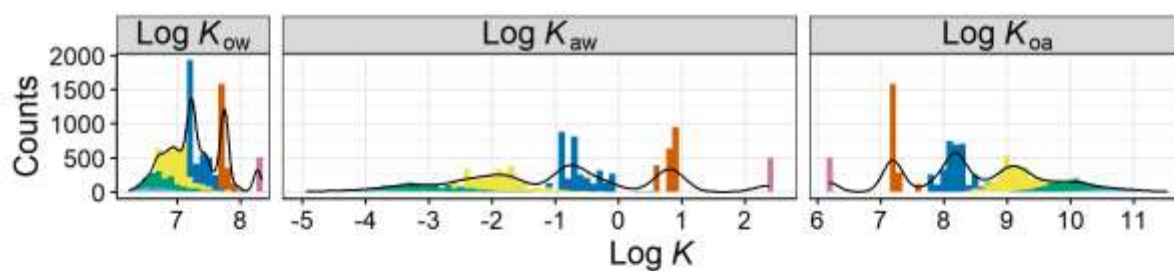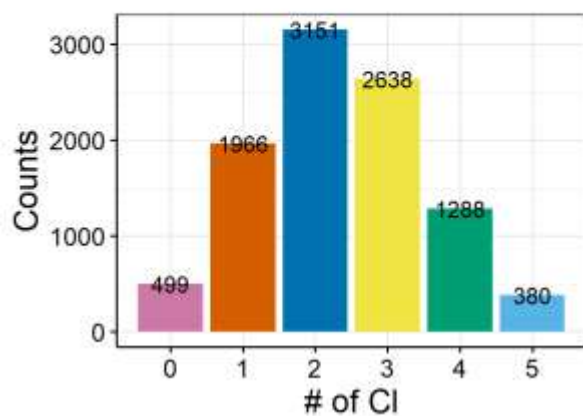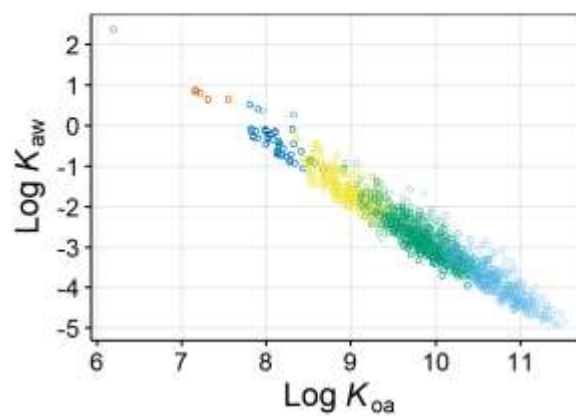

# C<sub>14</sub>, 40 wt% Cl

Total counts, 10,000; <100 counts omitted; bin width, 0.1; values, median

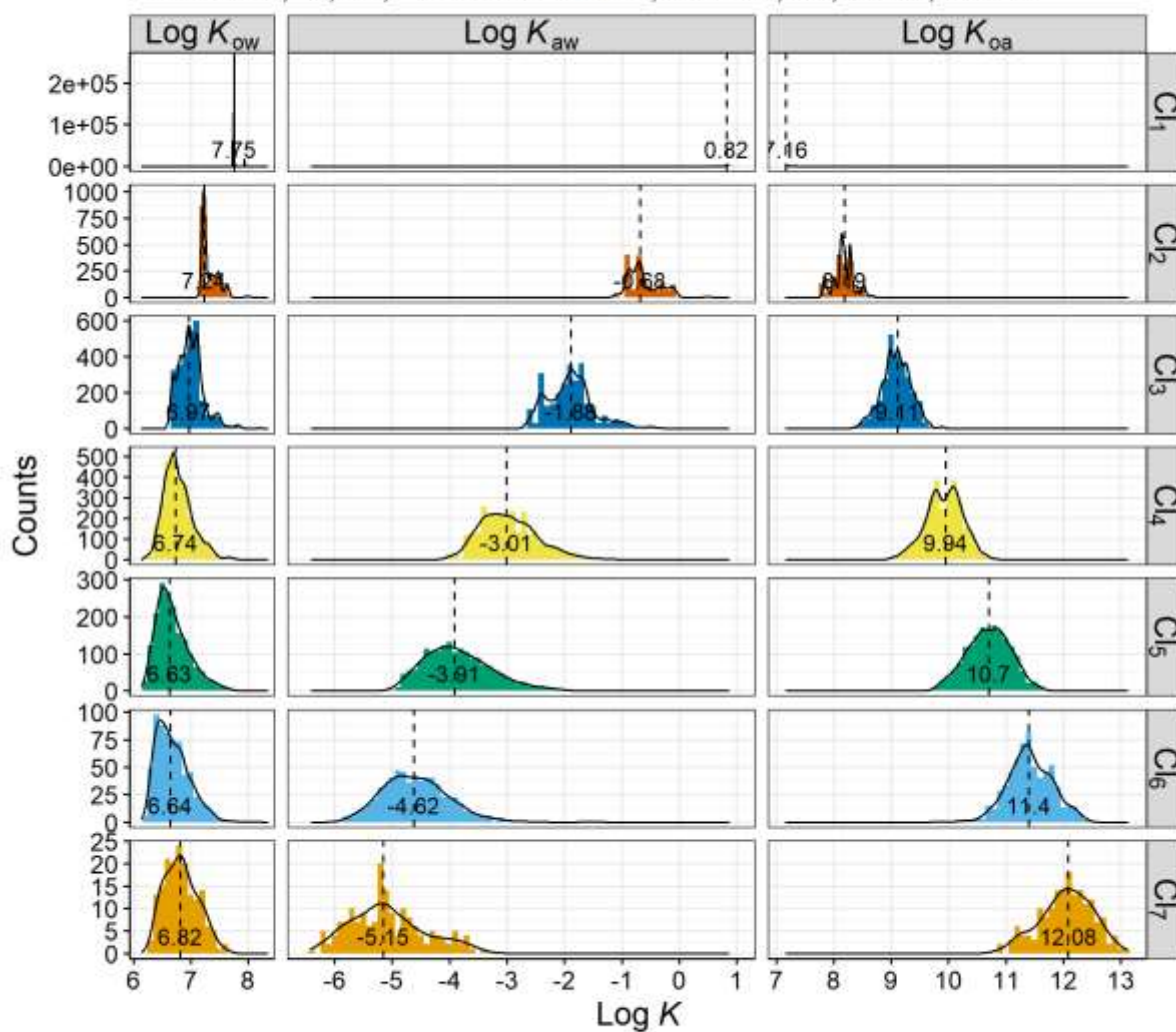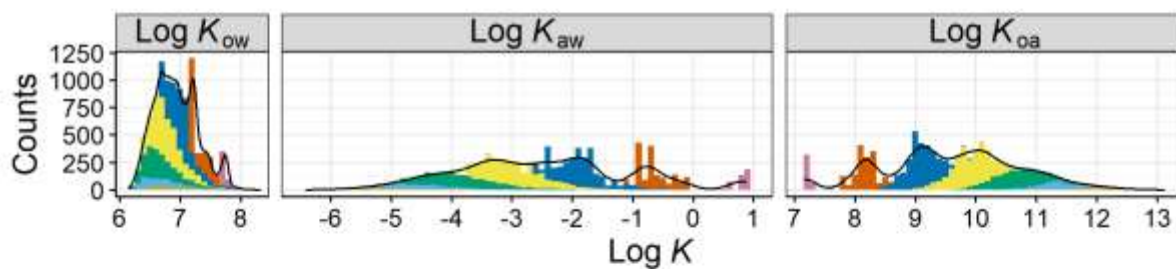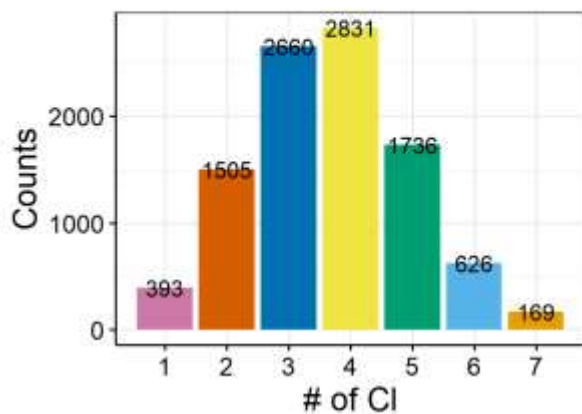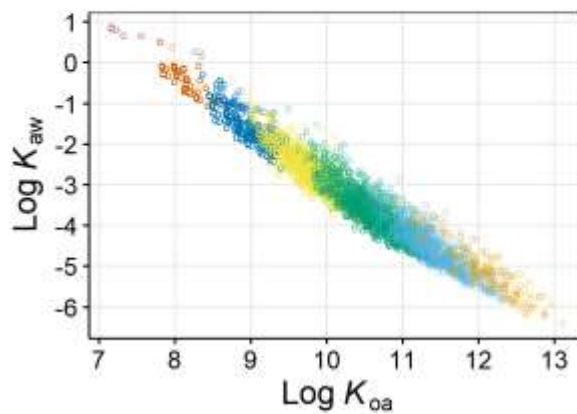



# C<sub>14</sub>, 50 wt% Cl

Total counts, 10,000; <100 counts omitted; bin width, 0.1; values, median

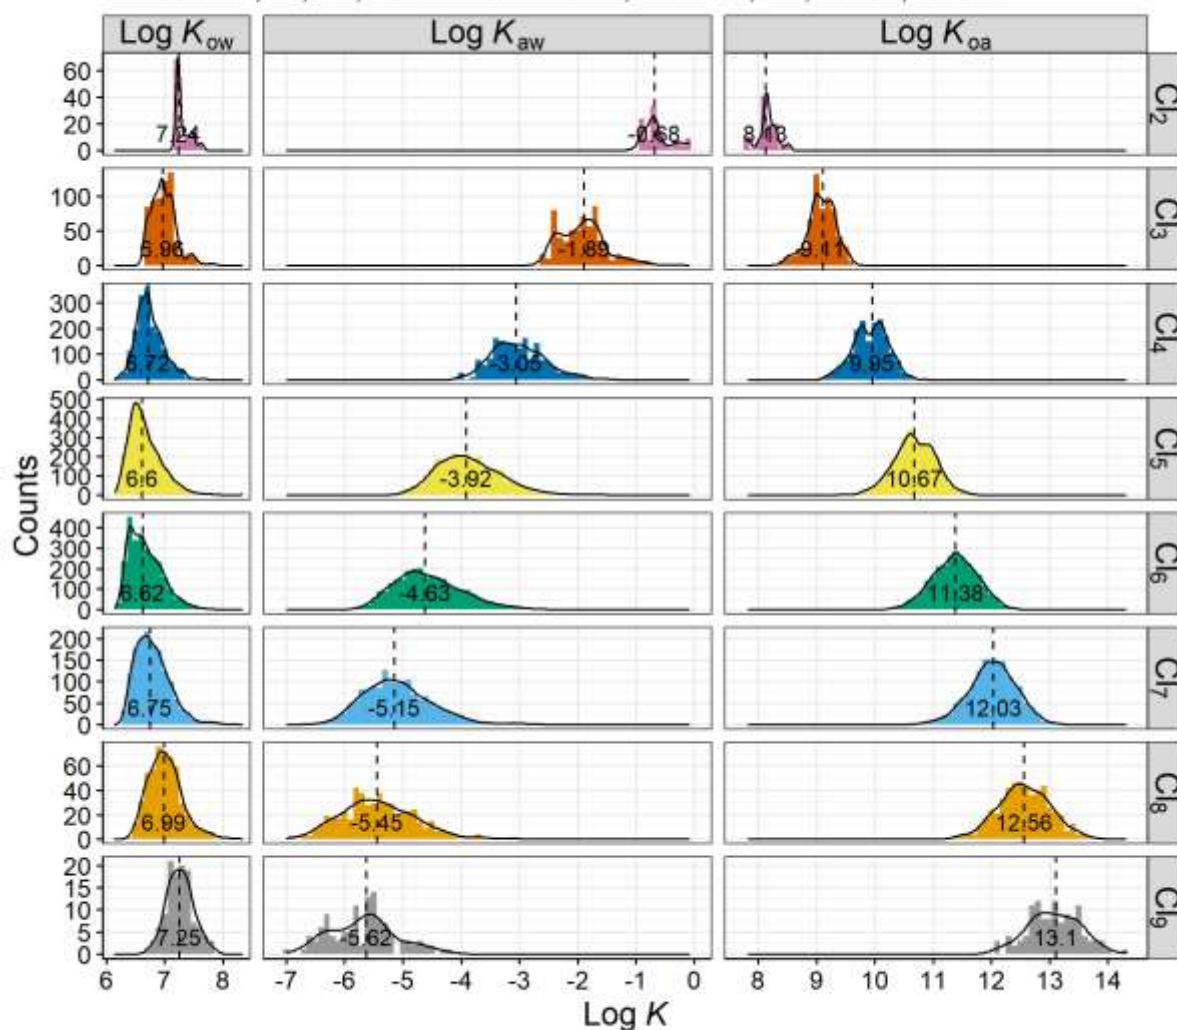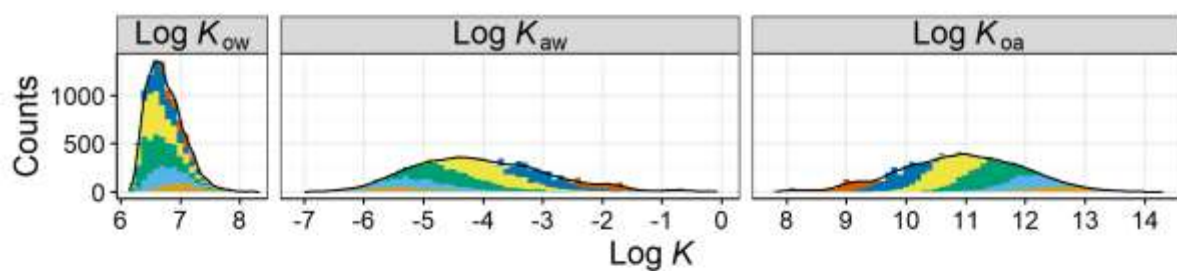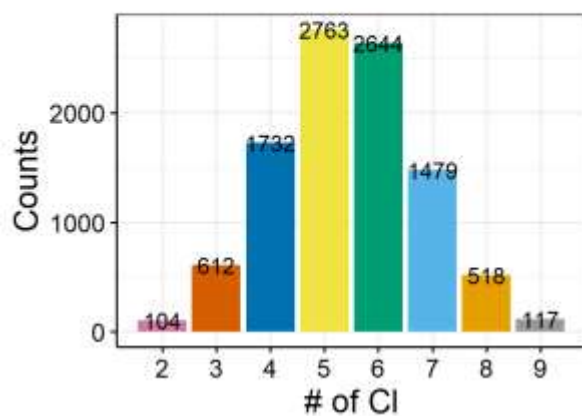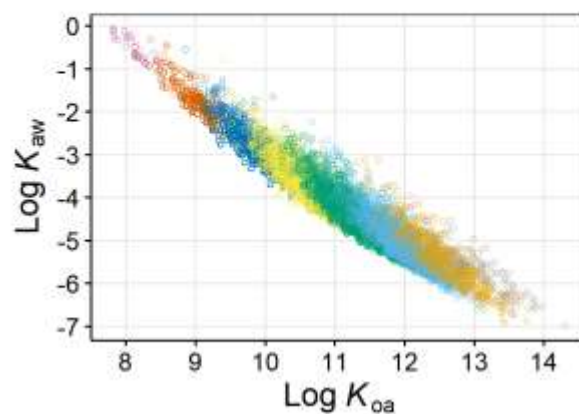



# C<sub>14</sub>, 60 wt% CI

Total counts, 10,000; <100 counts omitted; bin width, 0.1; values, median

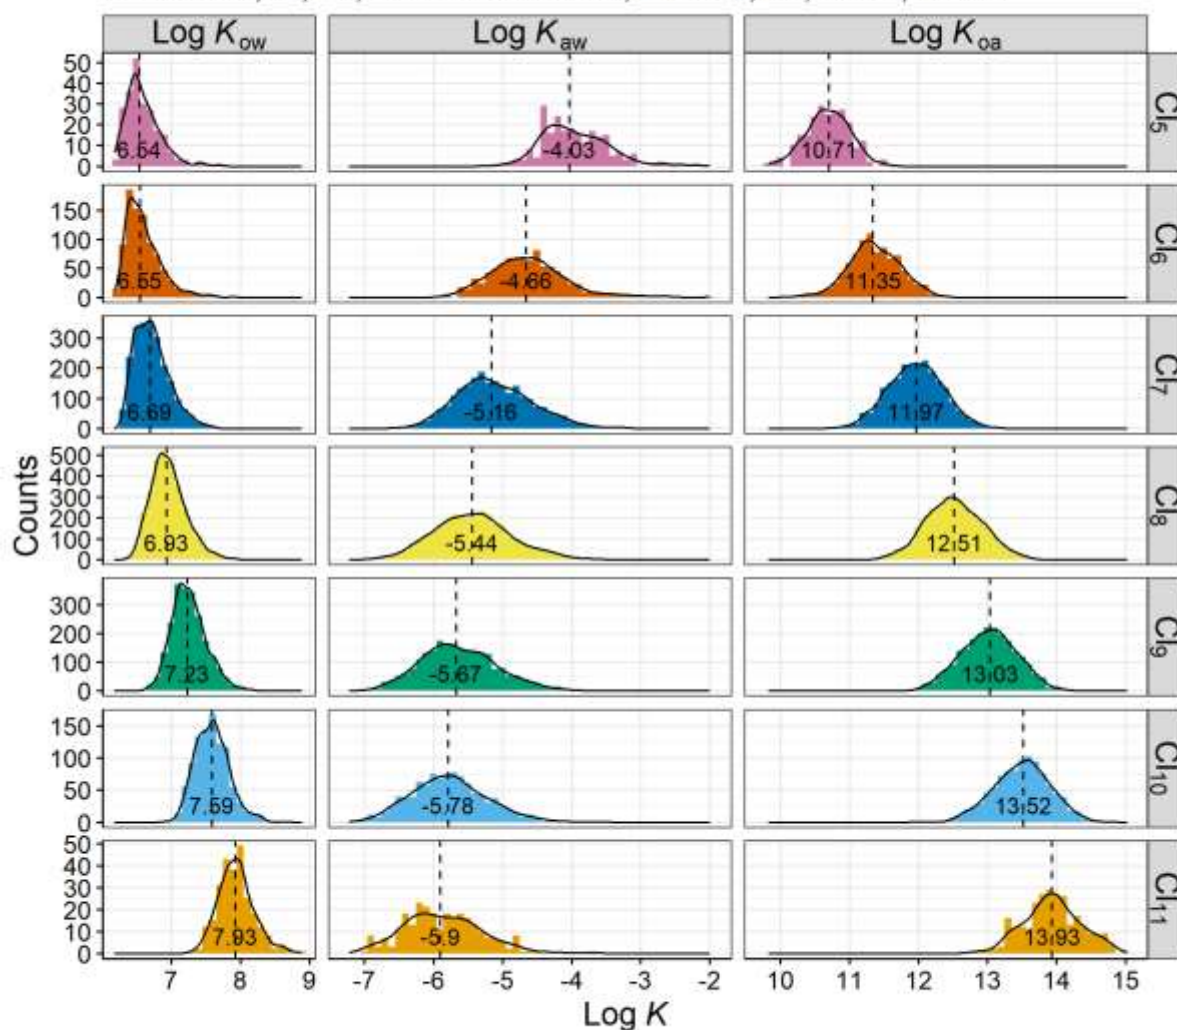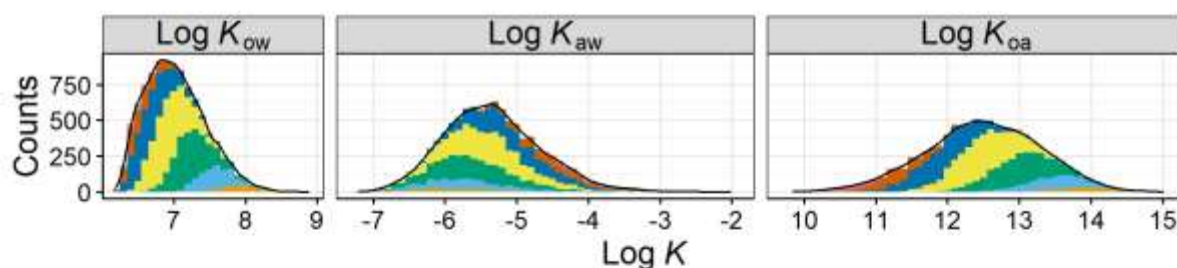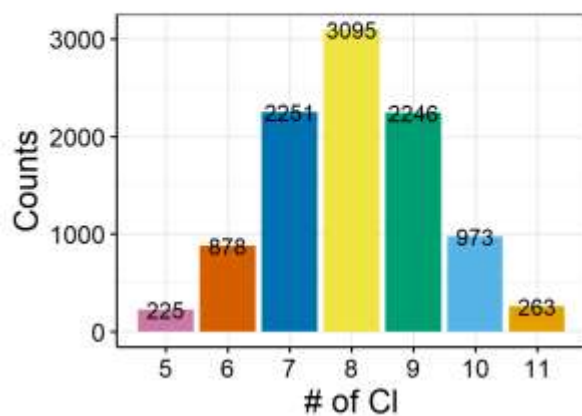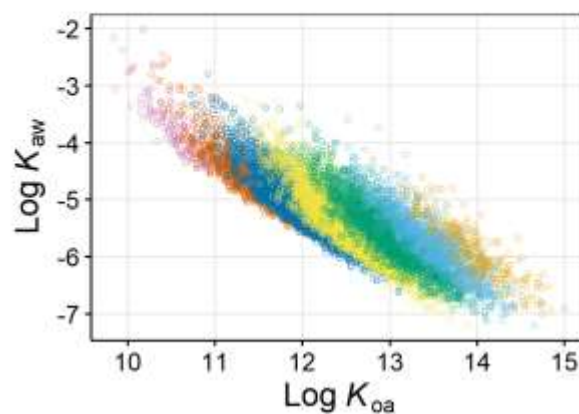

# C<sub>14</sub>, 70 wt% Cl

Total counts, 10,000; <100 counts omitted; bin width, 0.1; values, median

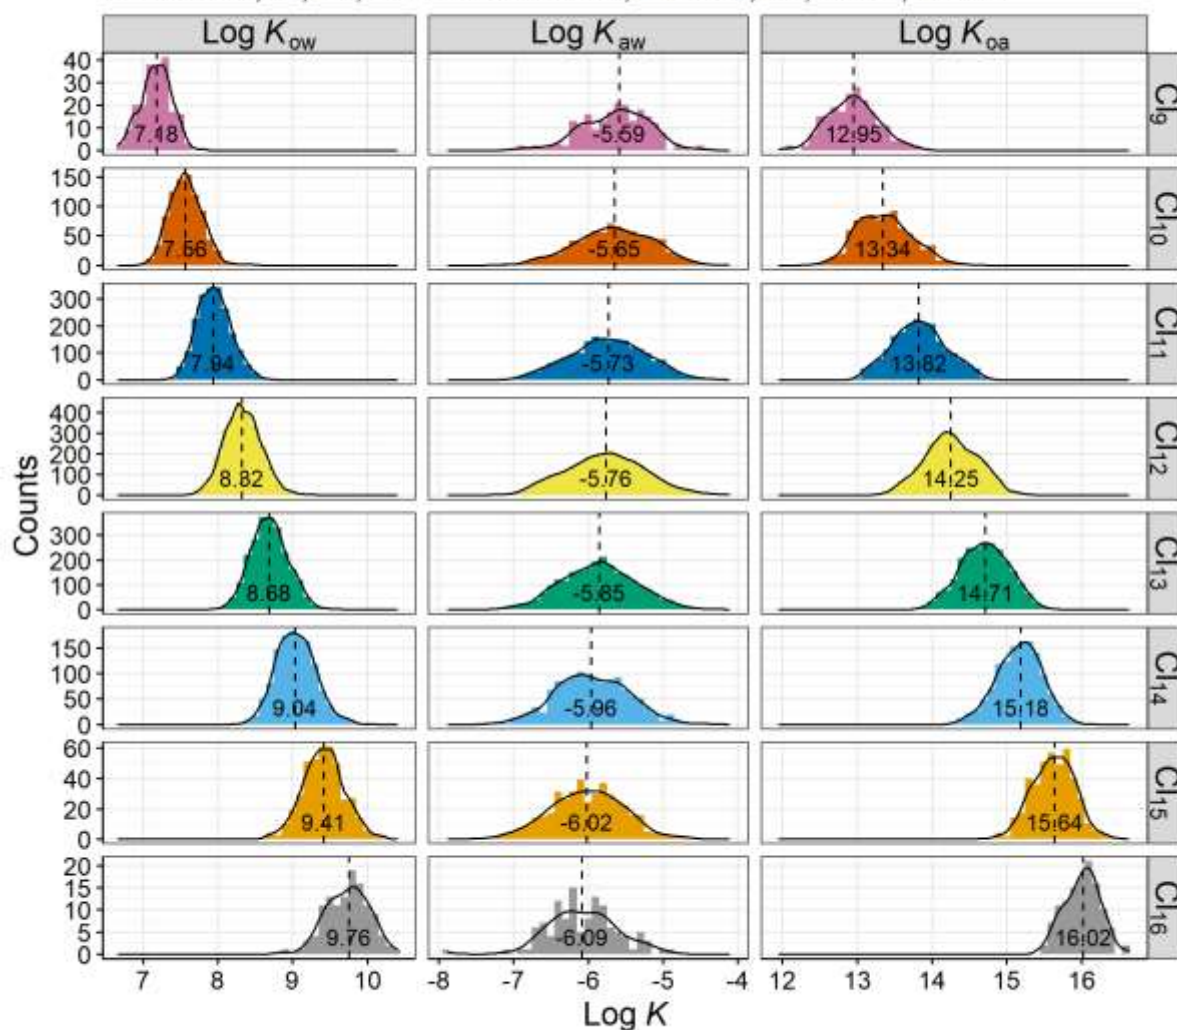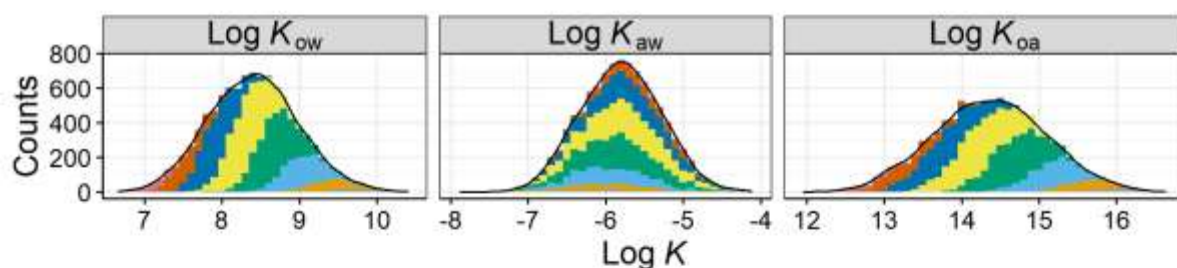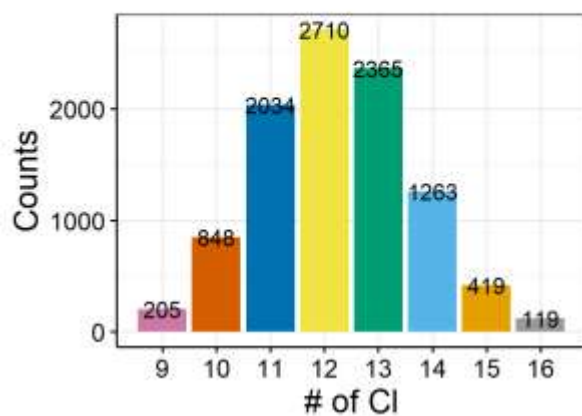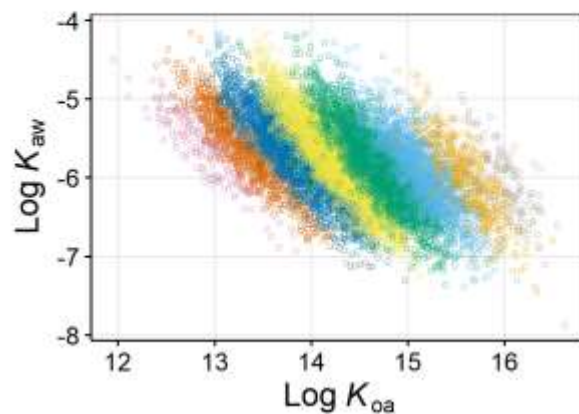

# C<sub>15</sub>, 30 wt% CI

Total counts, 10,000; <100 counts omitted; bin width, 0.1; values, median

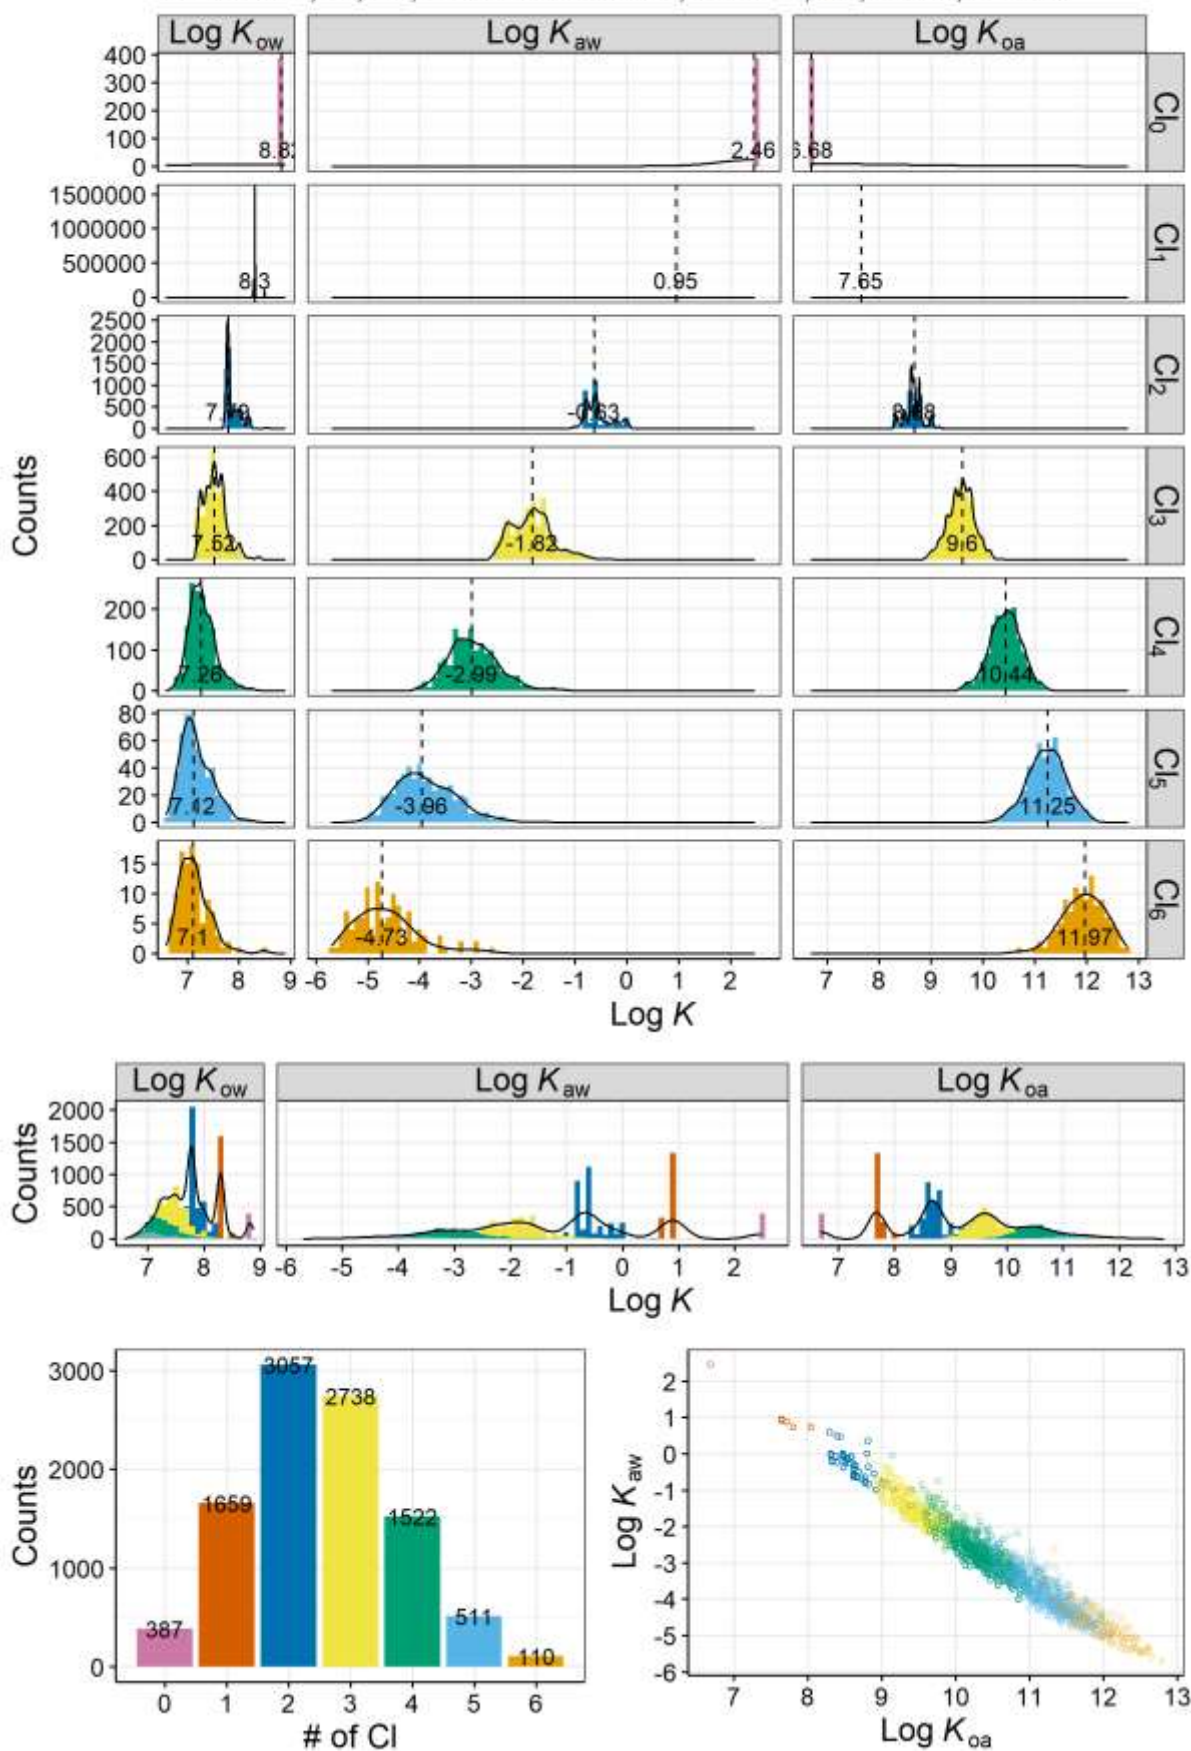



# C<sub>15</sub>, 40 wt% CI

Total counts, 10,000; <100 counts omitted; bin width, 0.1; values, median

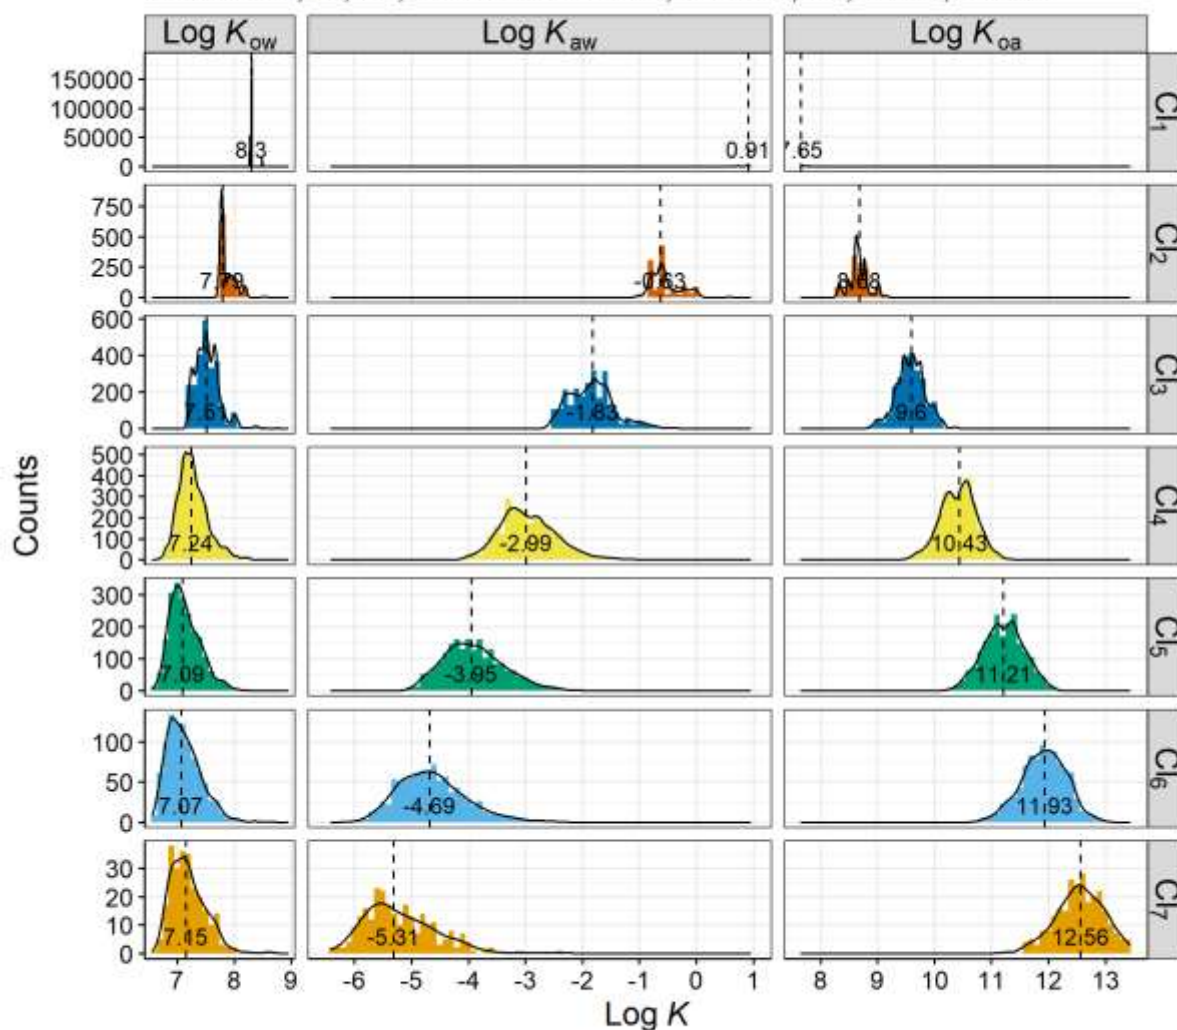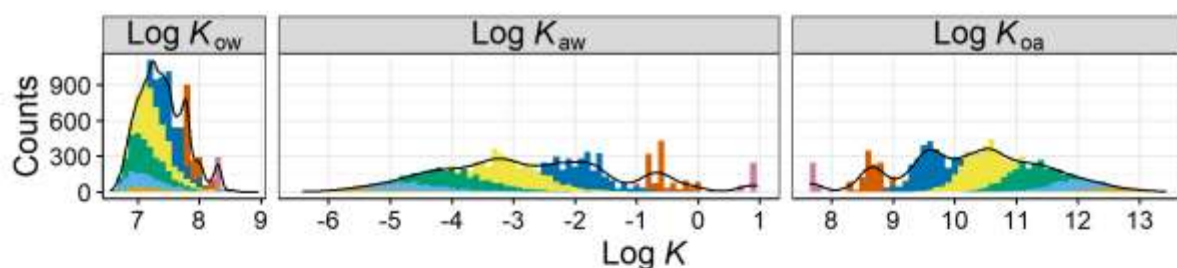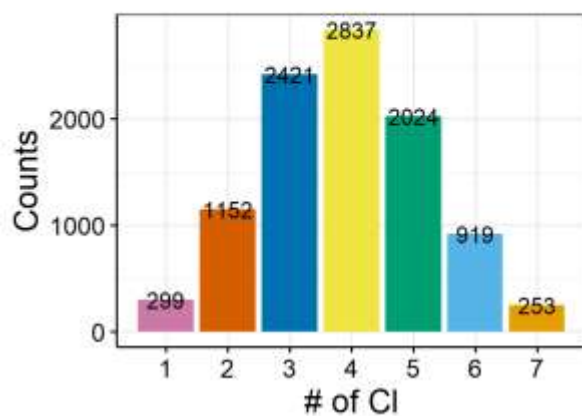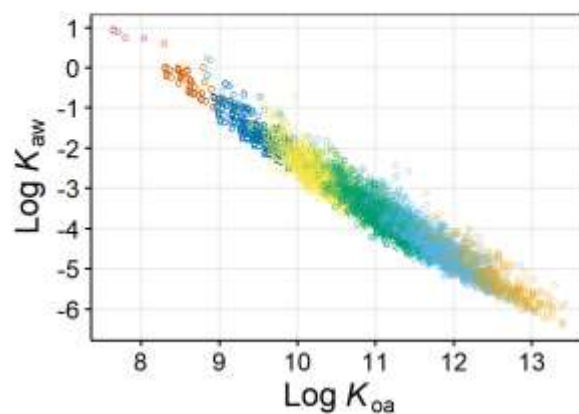

# C<sub>15</sub>, 50 wt% Cl

Total counts, 10,000; <100 counts omitted; bin width, 0.1; values, median

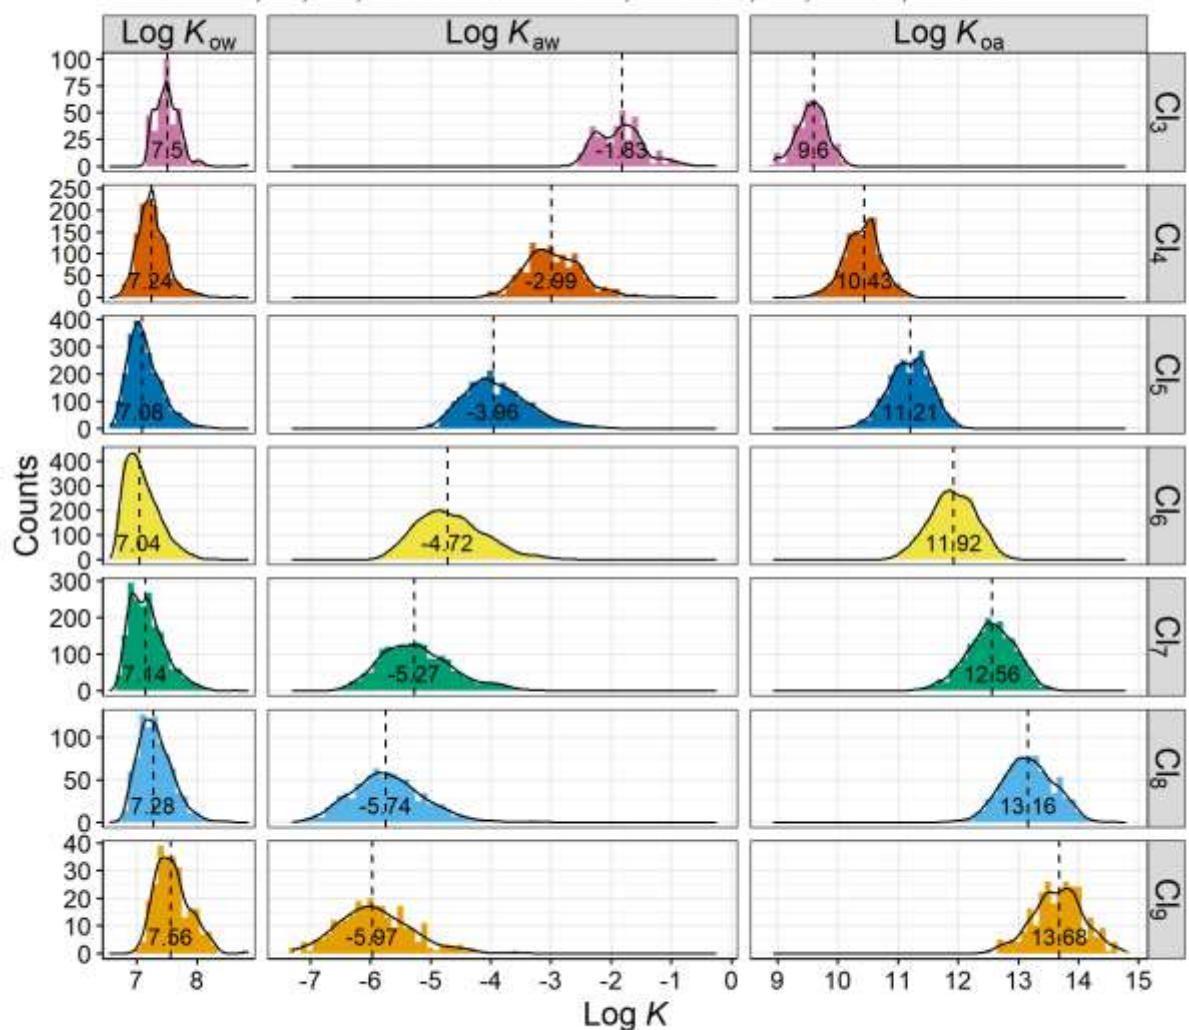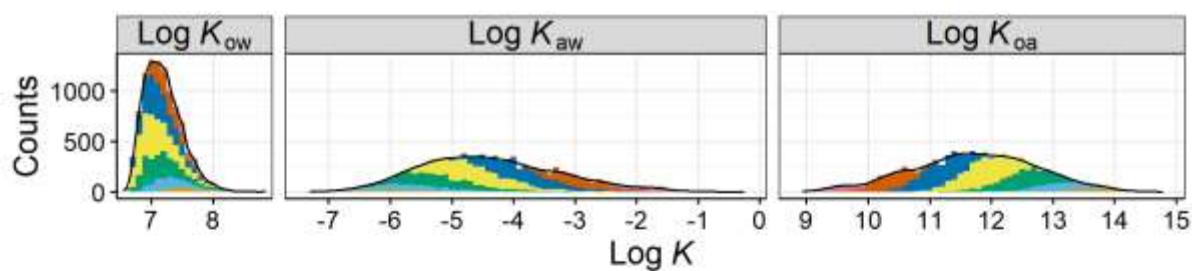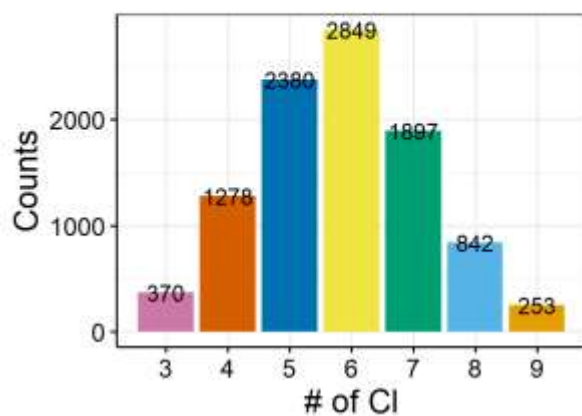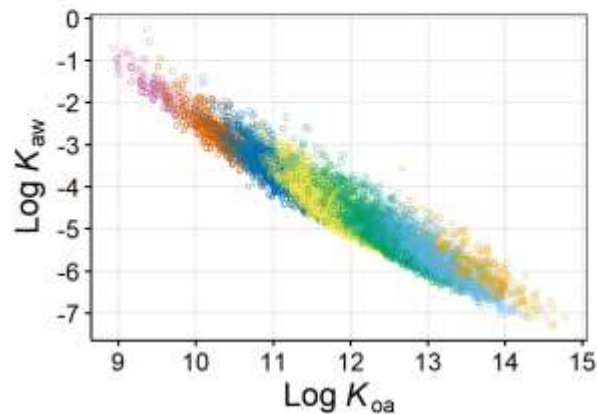

# C<sub>15</sub>, 60 wt% CI

Total counts, 10,000; <100 counts omitted; bin width, 0.1; values, median

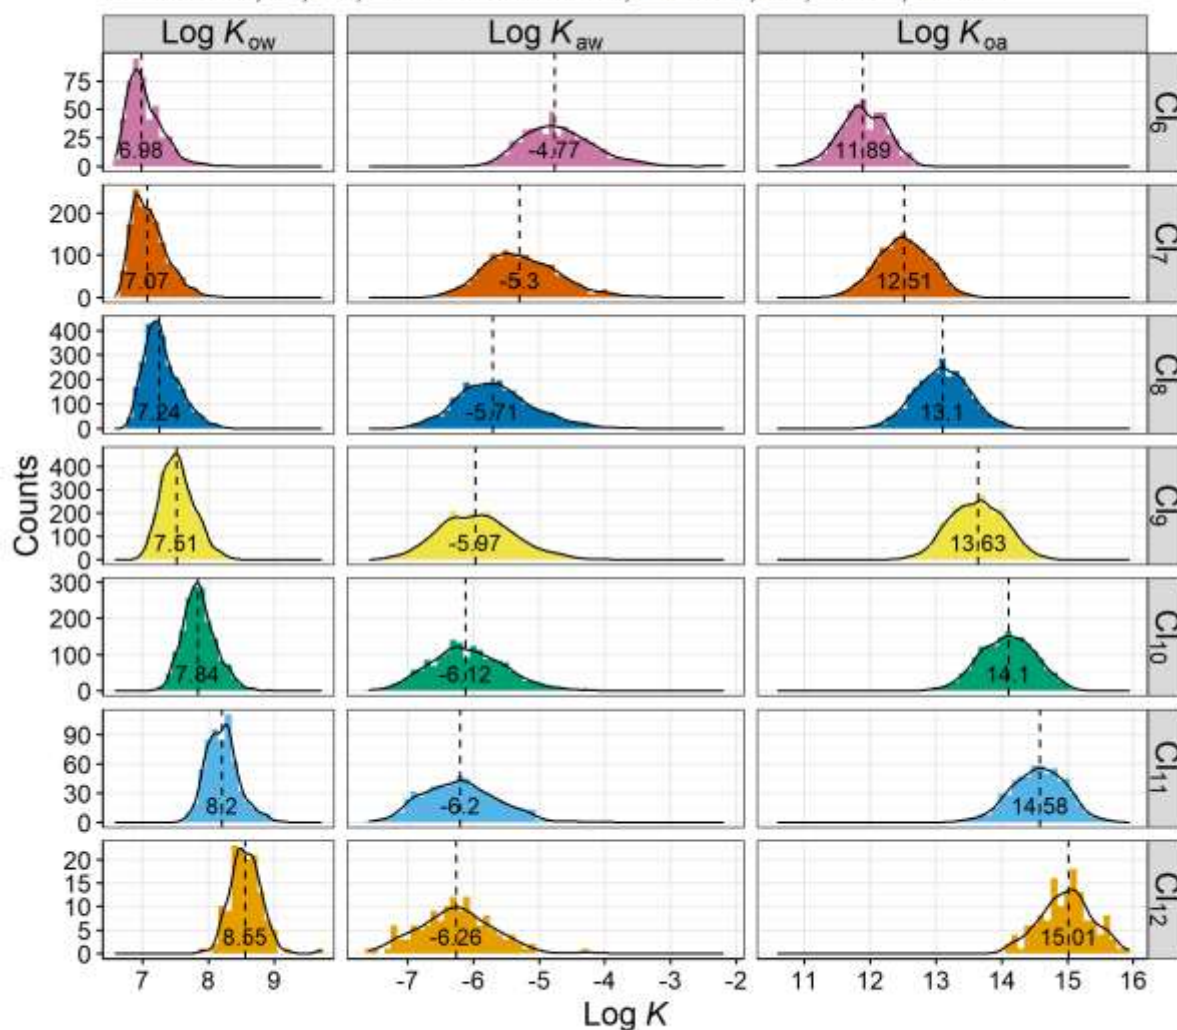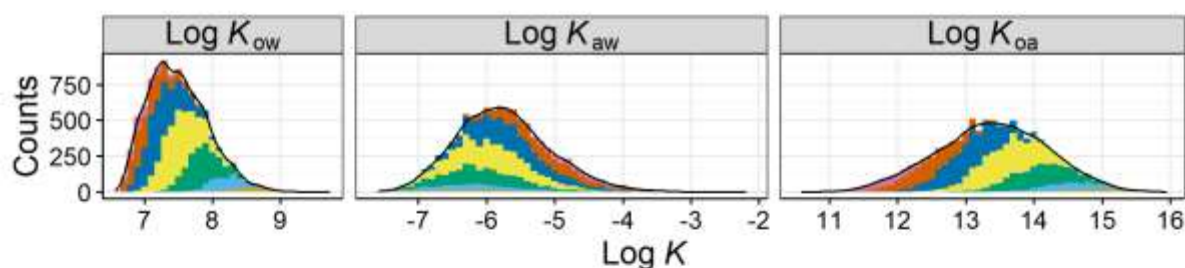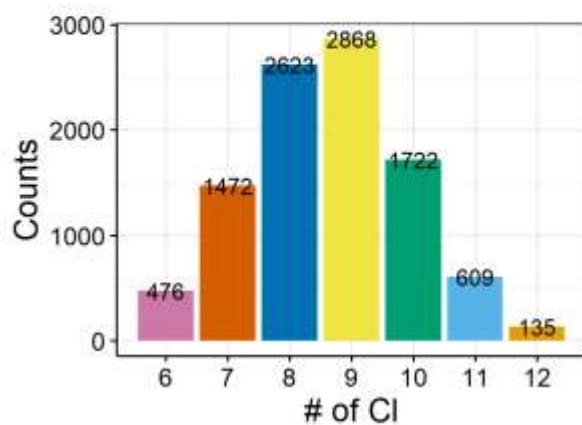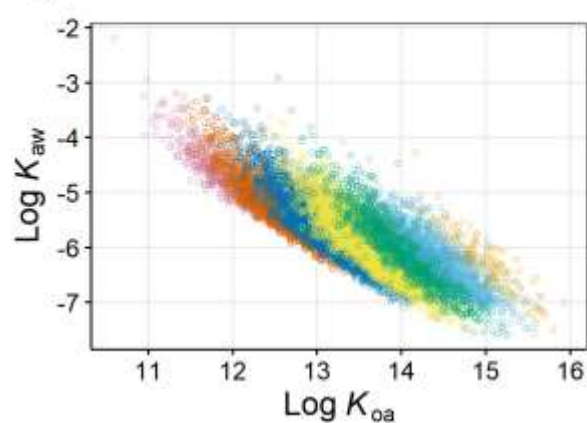



# C<sub>15</sub>, 70 wt% CI

Total counts, 10,000; <100 counts omitted; bin width, 0.1; values, median

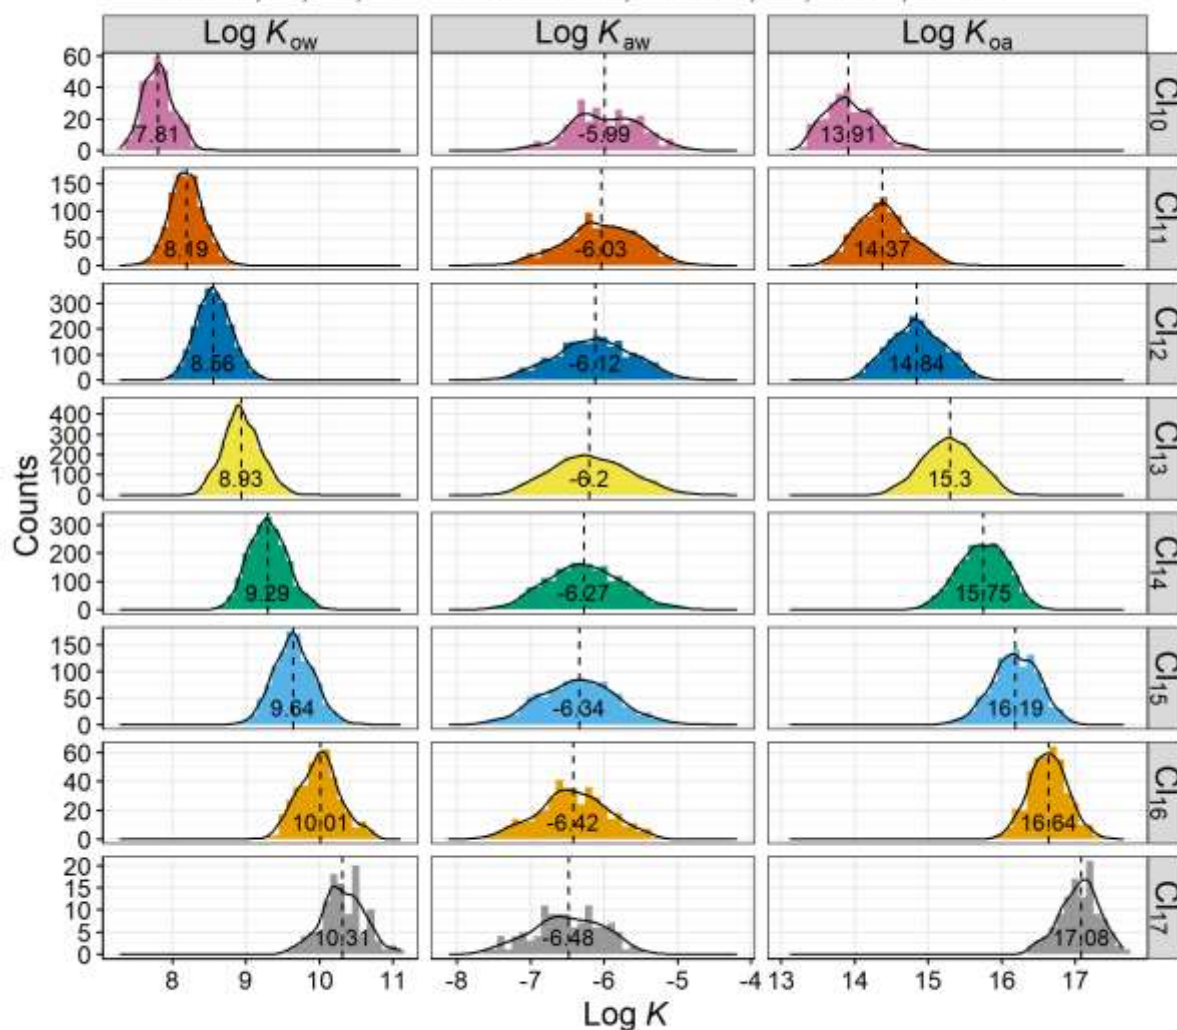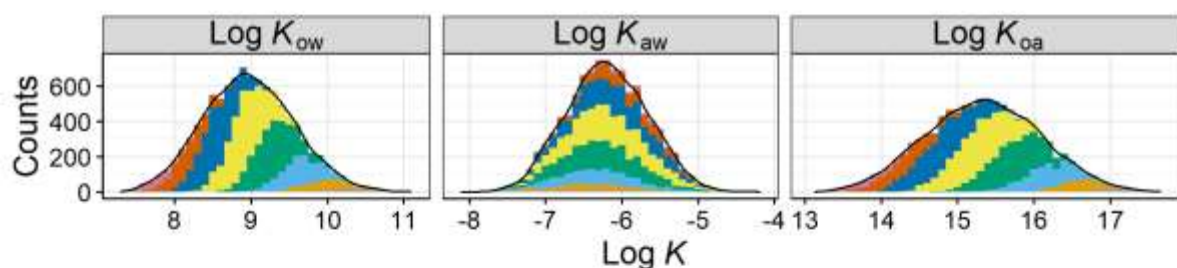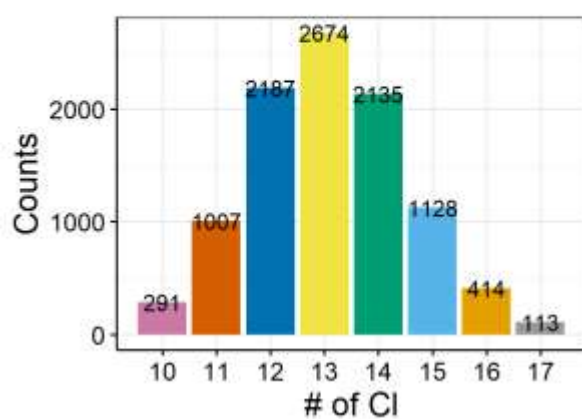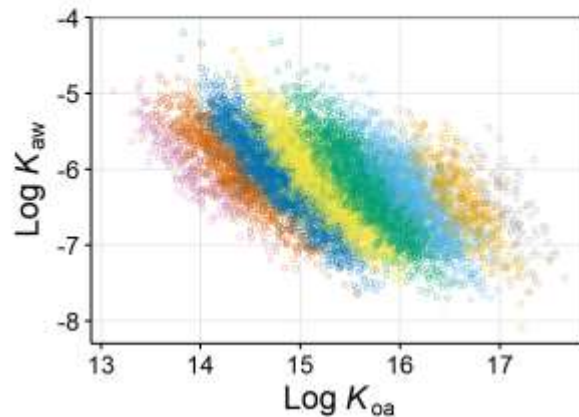



# C<sub>16</sub>, 30 wt% CI

Total counts, 10,000; <100 counts omitted; bin width, 0.1; values, median

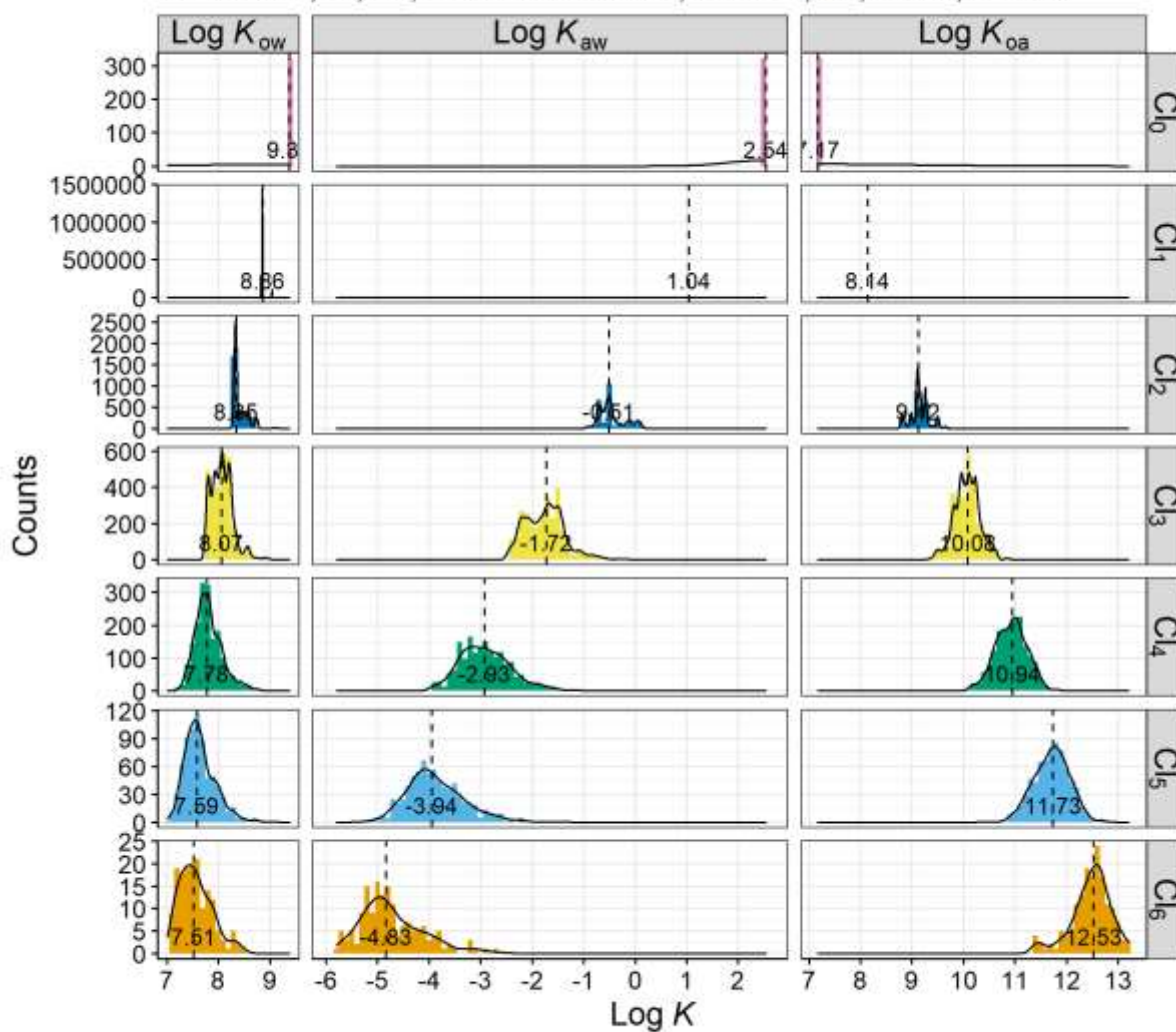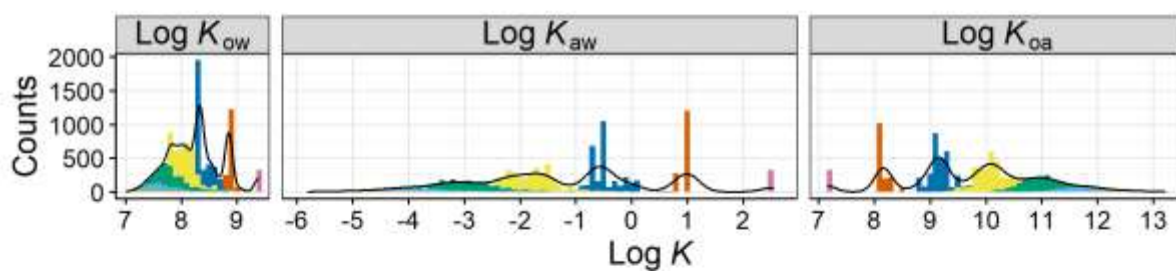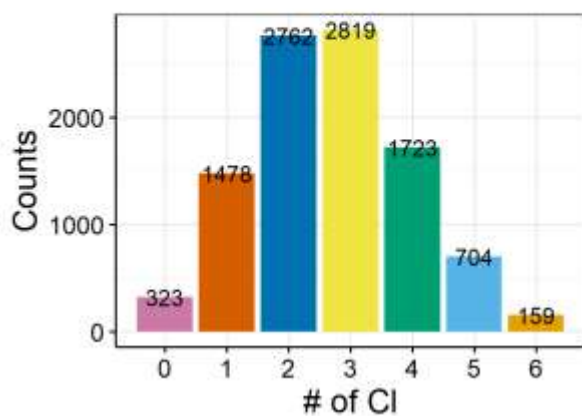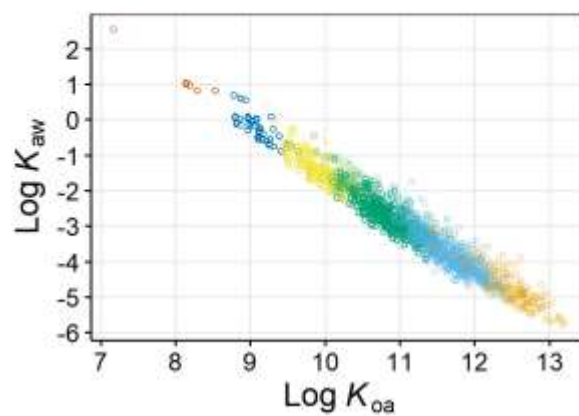

# C<sub>16</sub>, 40 wt% CI

Total counts, 10,000; <100 counts omitted; bin width, 0.1; values, median

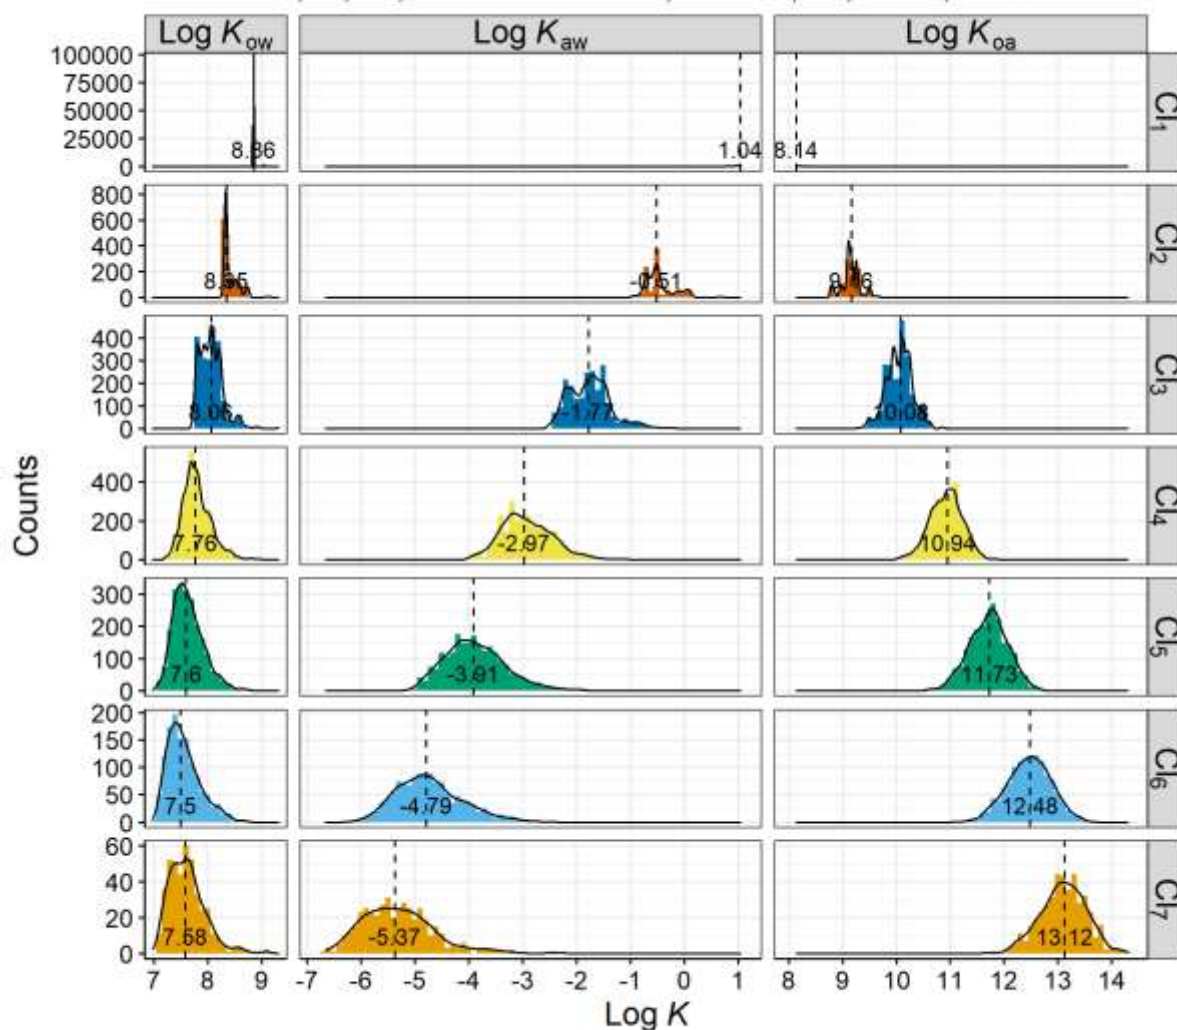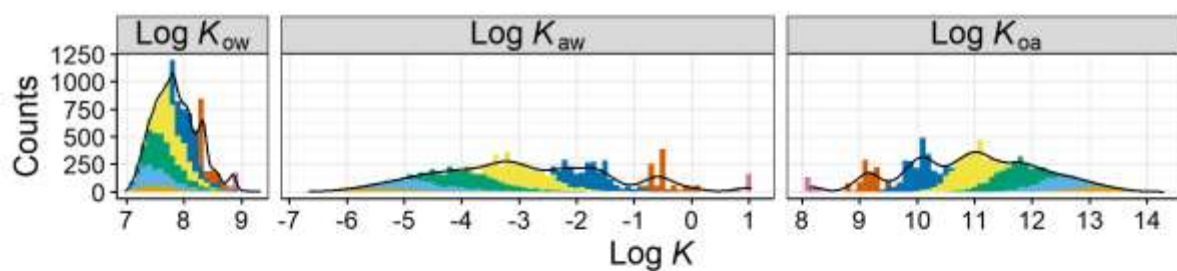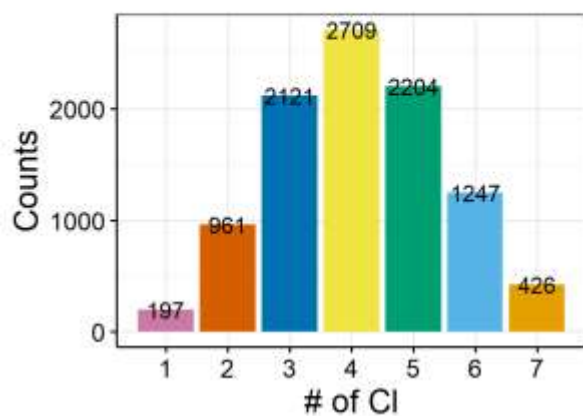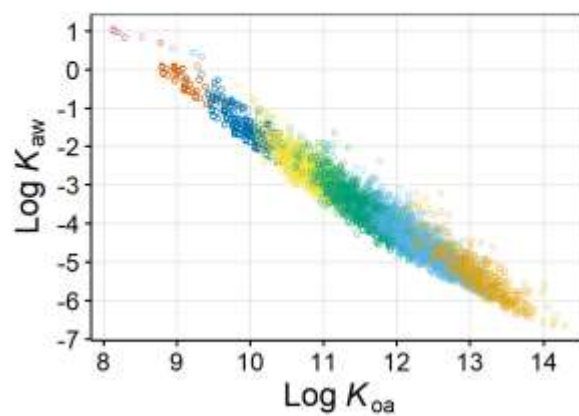

# C<sub>16</sub>, 50 wt% Cl

Total counts, 10,000; <100 counts omitted; bin width, 0.1; values, median

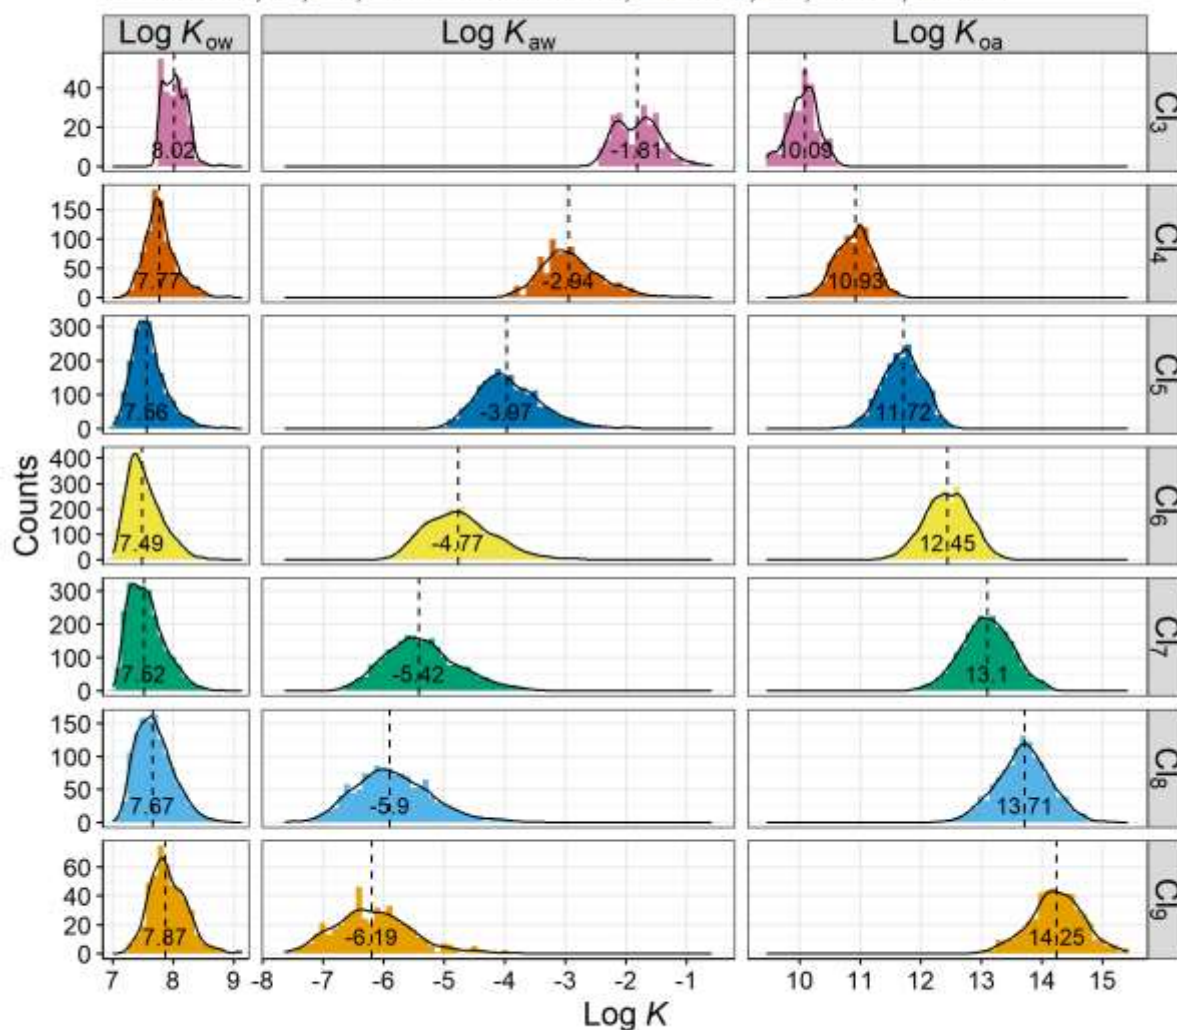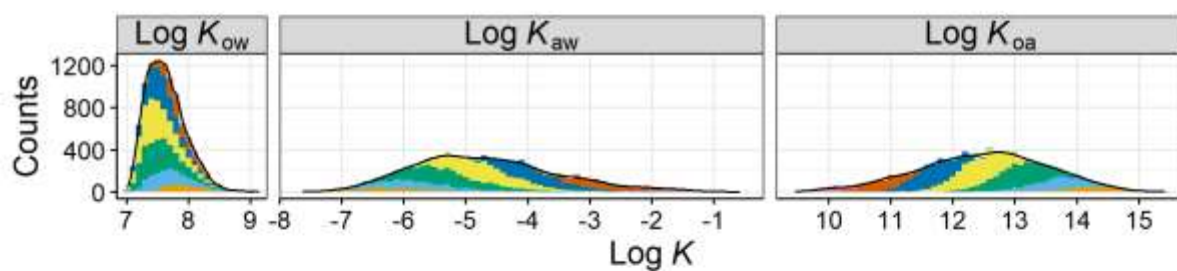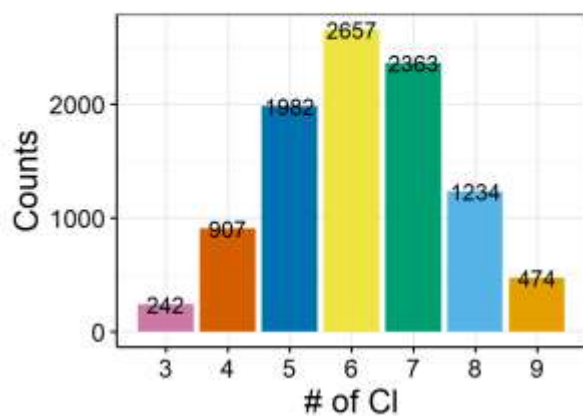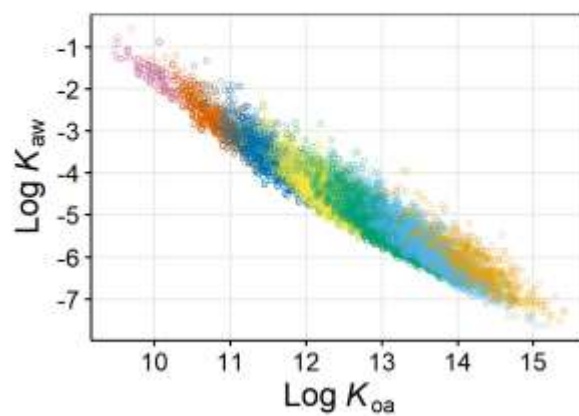



# C<sub>16</sub>, 60 wt% CI

Total counts, 10,000; <100 counts omitted; bin width, 0.1; values, median

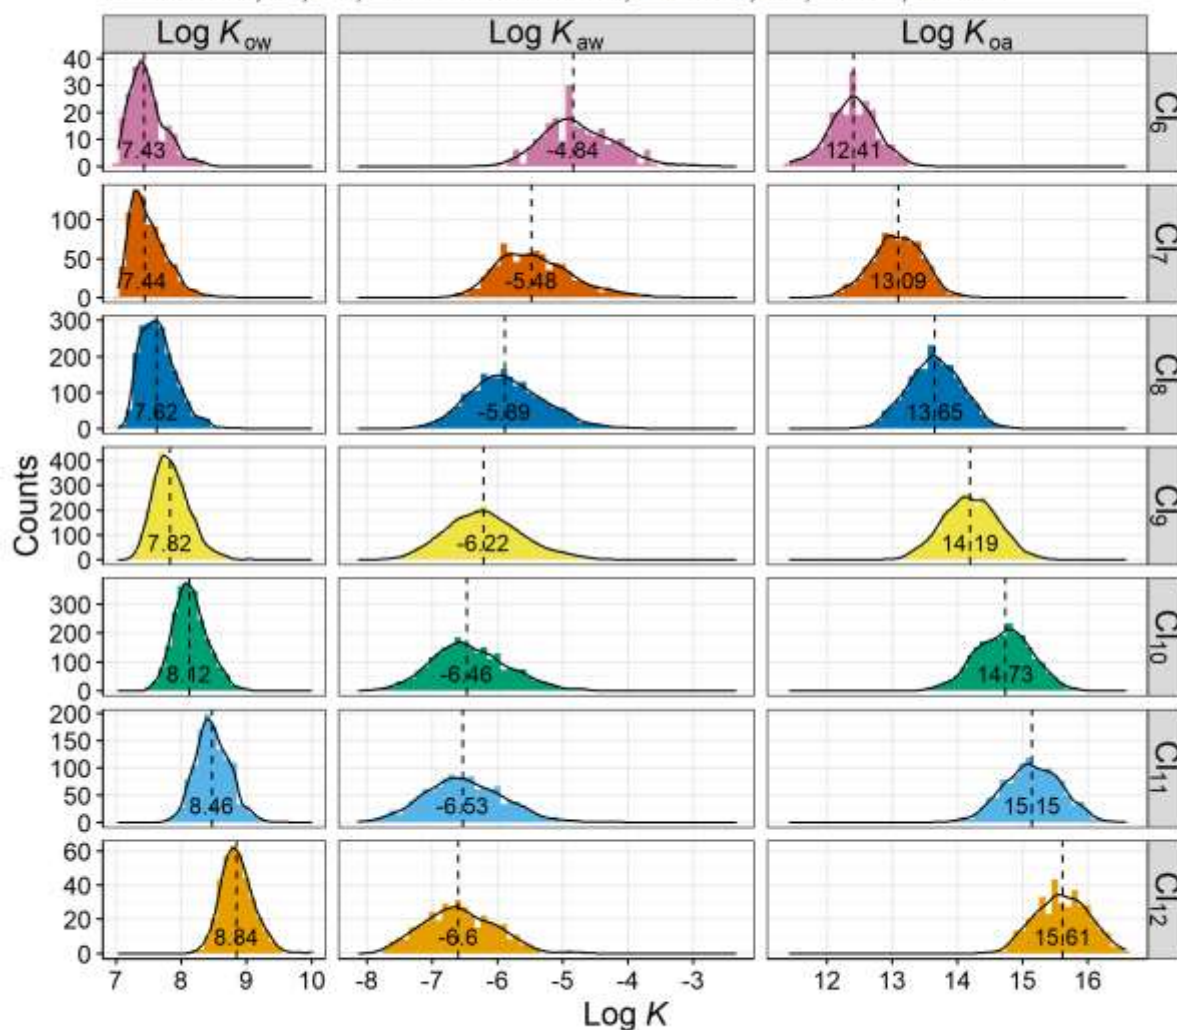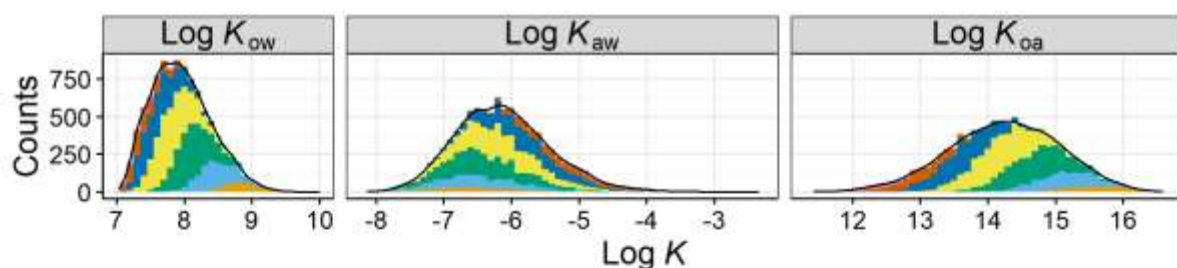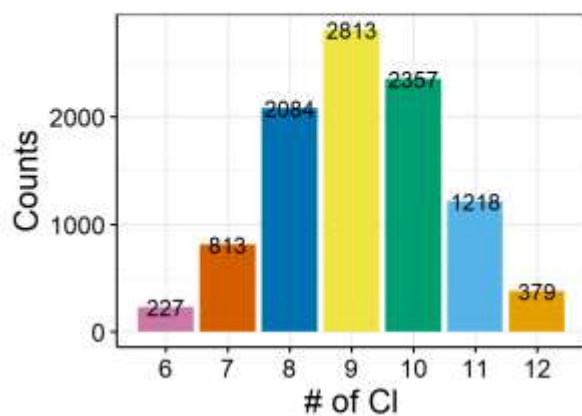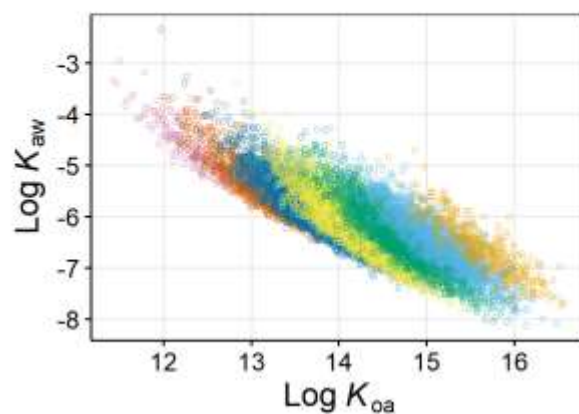

# C<sub>16</sub>, 70 wt% Cl

Total counts, 10,000; <100 counts omitted; bin width, 0.1; values, median

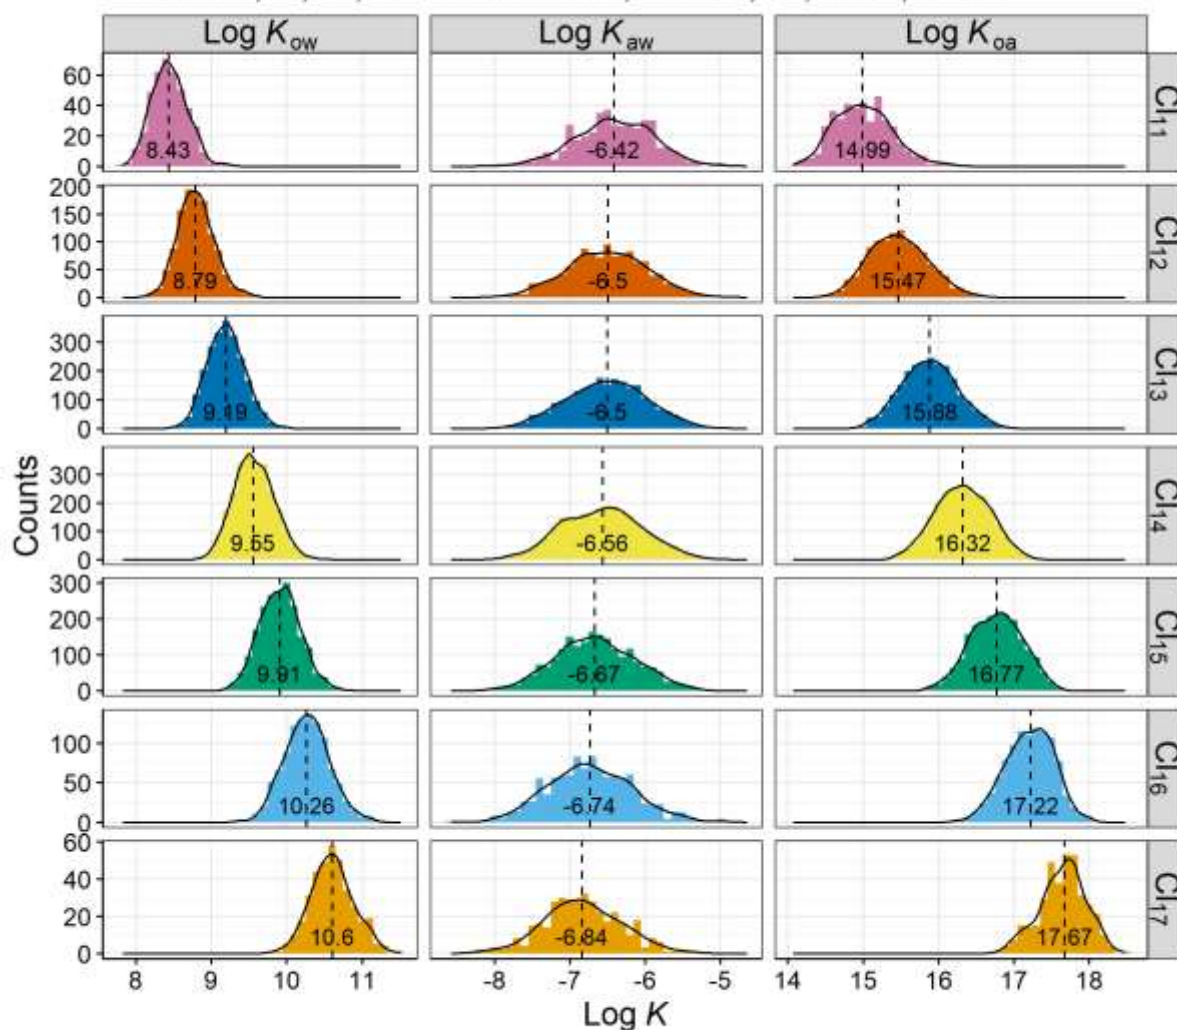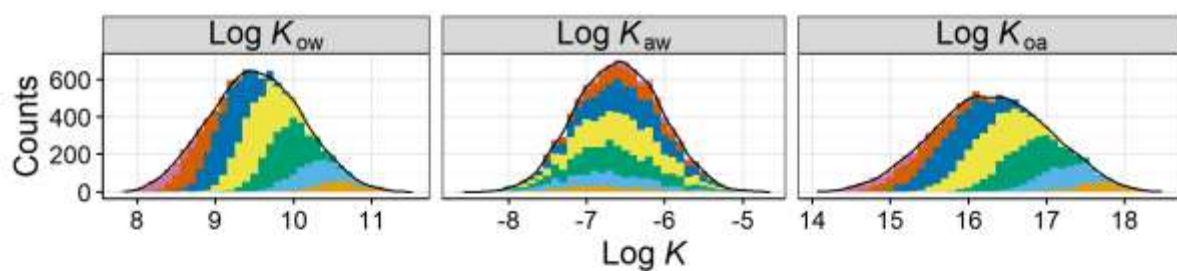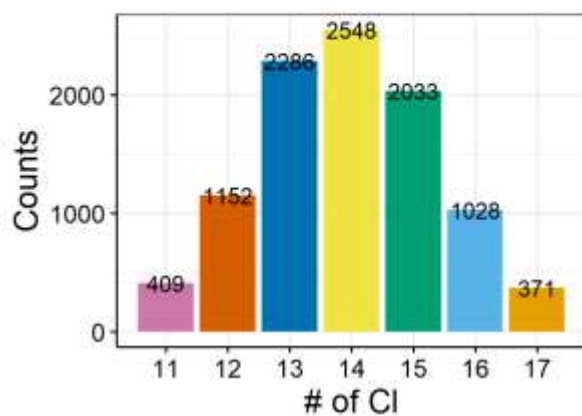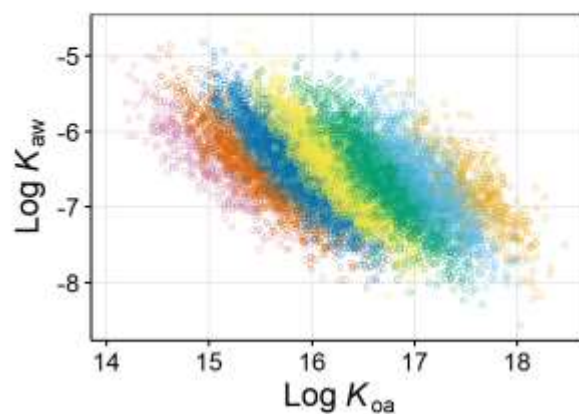

# C<sub>17</sub>, 30 wt% CI

Total counts, 10,000; <100 counts omitted; bin width, 0.1; values, median

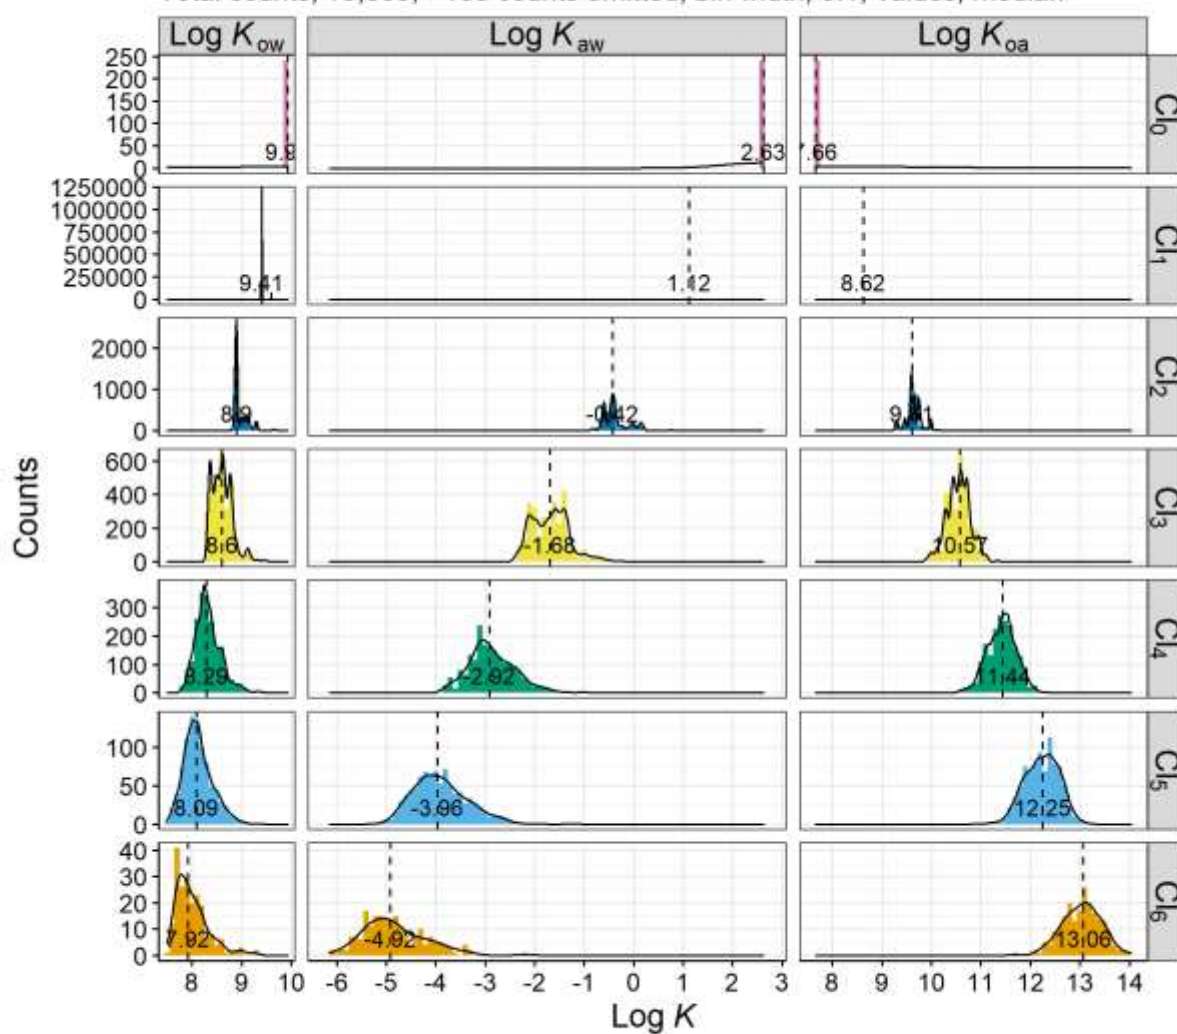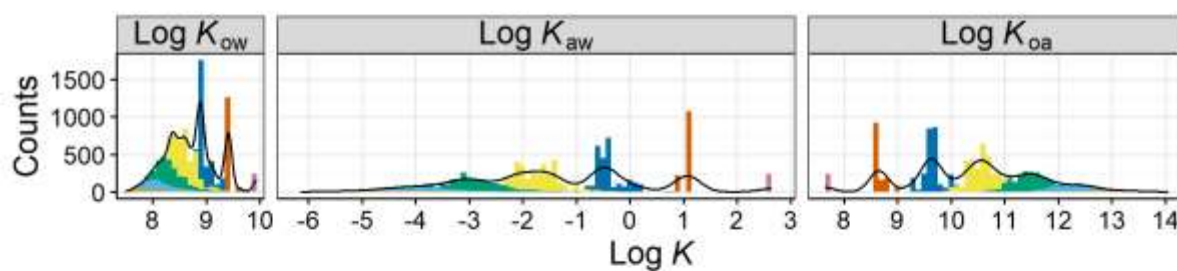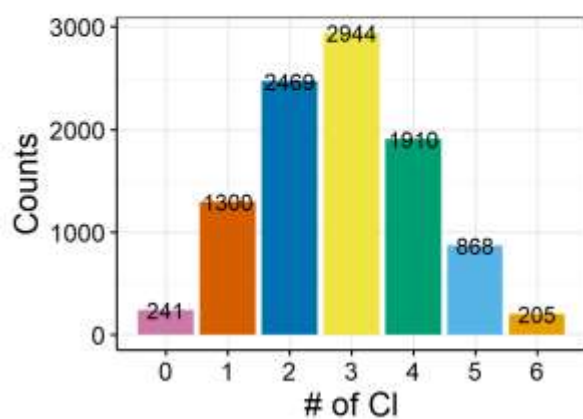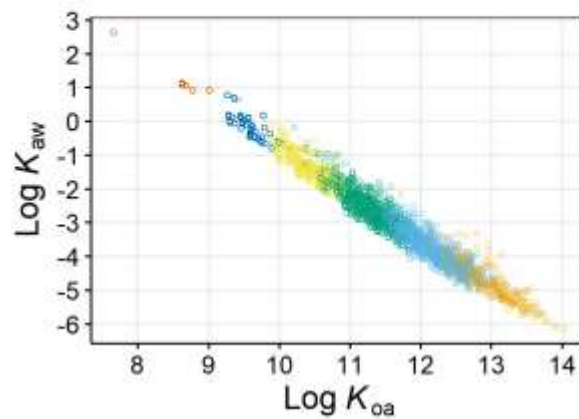



# C<sub>17</sub>, 40 wt% Cl

Total counts, 10,000; <100 counts omitted; bin width, 0.1; values, median

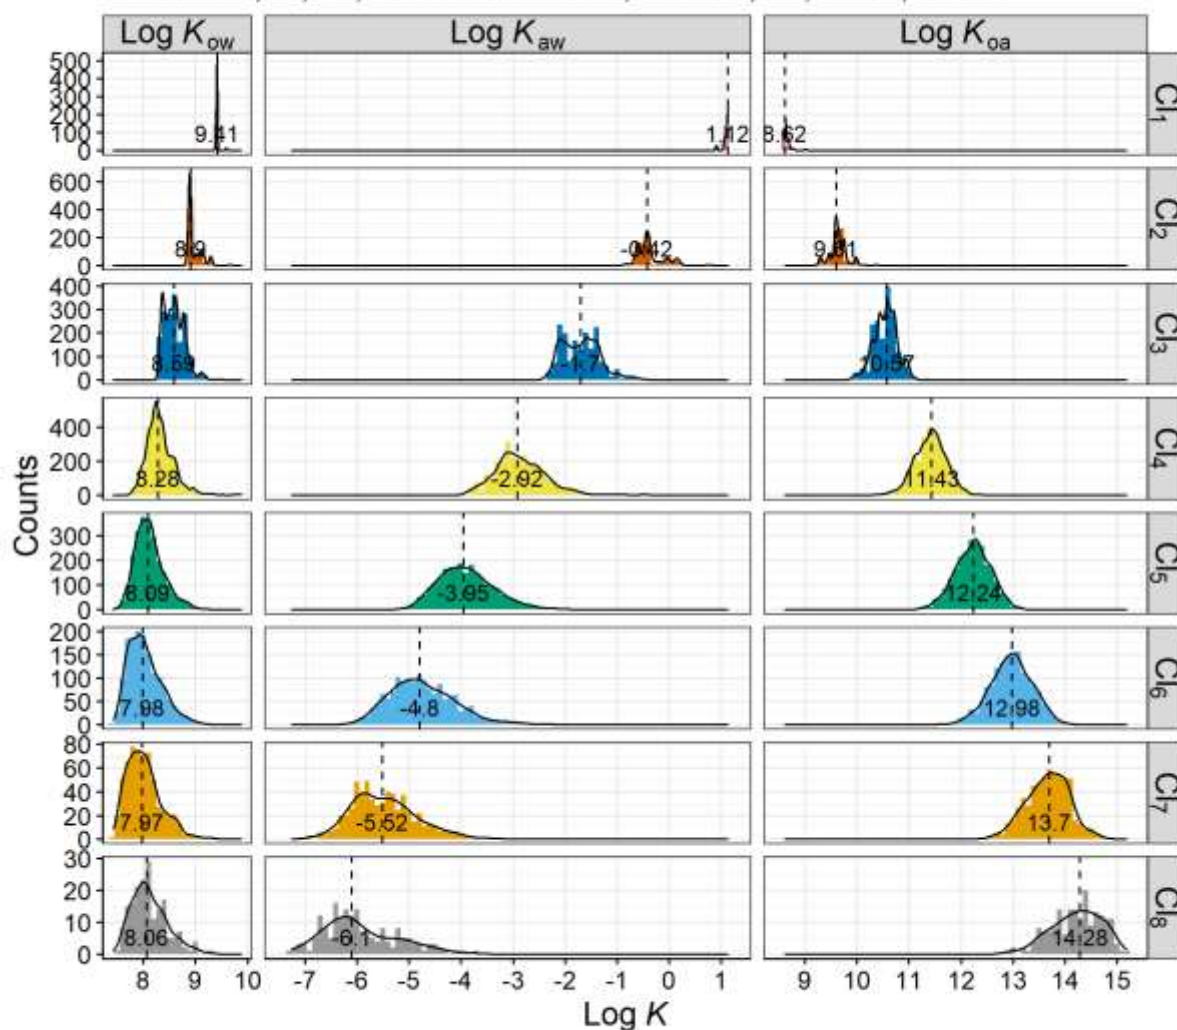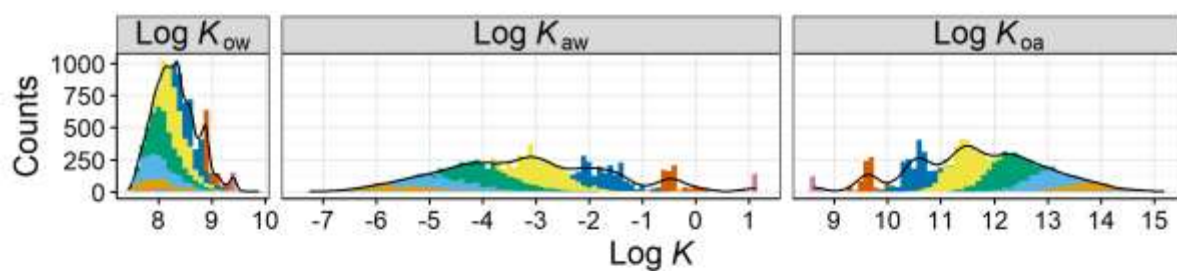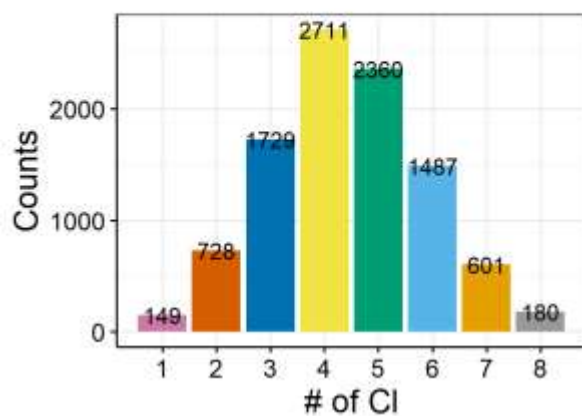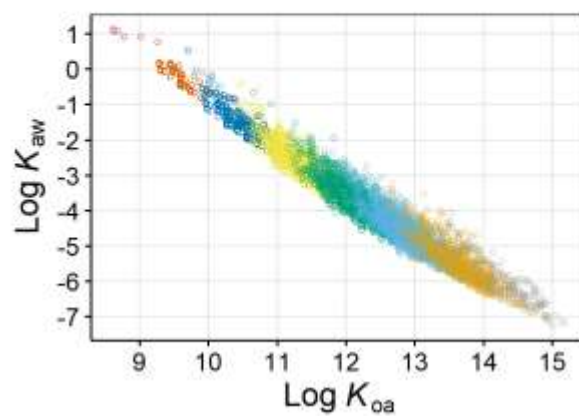

# C<sub>17</sub>, 50 wt% CI

Total counts, 10,000; <100 counts omitted; bin width, 0.1; values, median

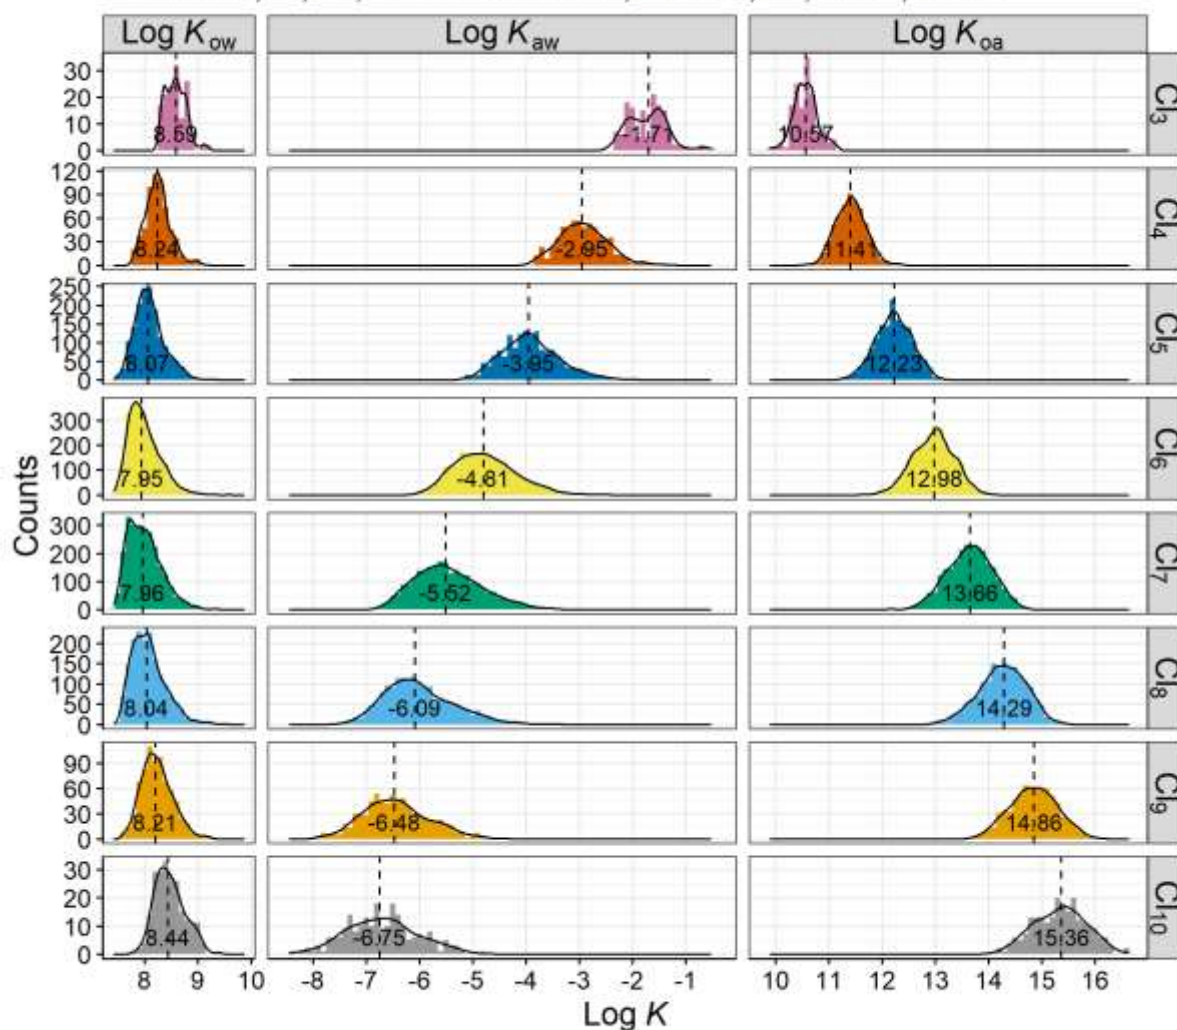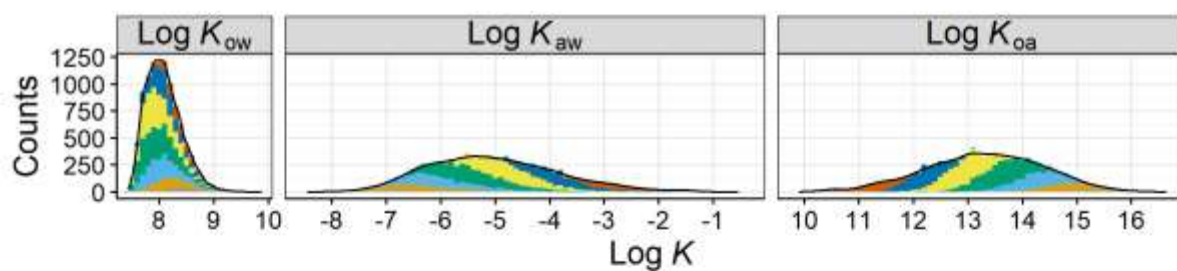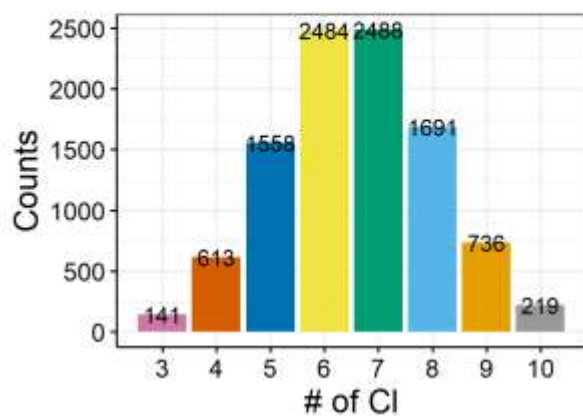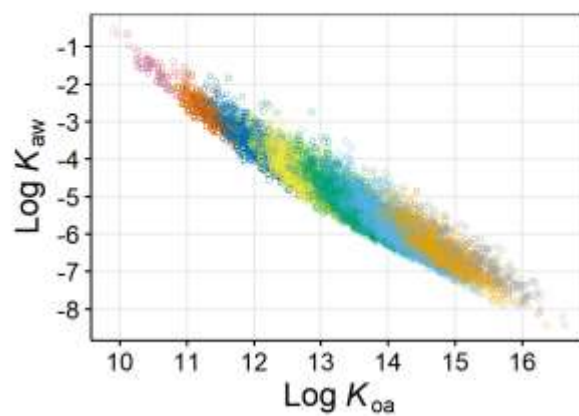

# C<sub>17</sub>, 60 wt% CI

Total counts, 10,000; <100 counts omitted; bin width, 0.1; values, median

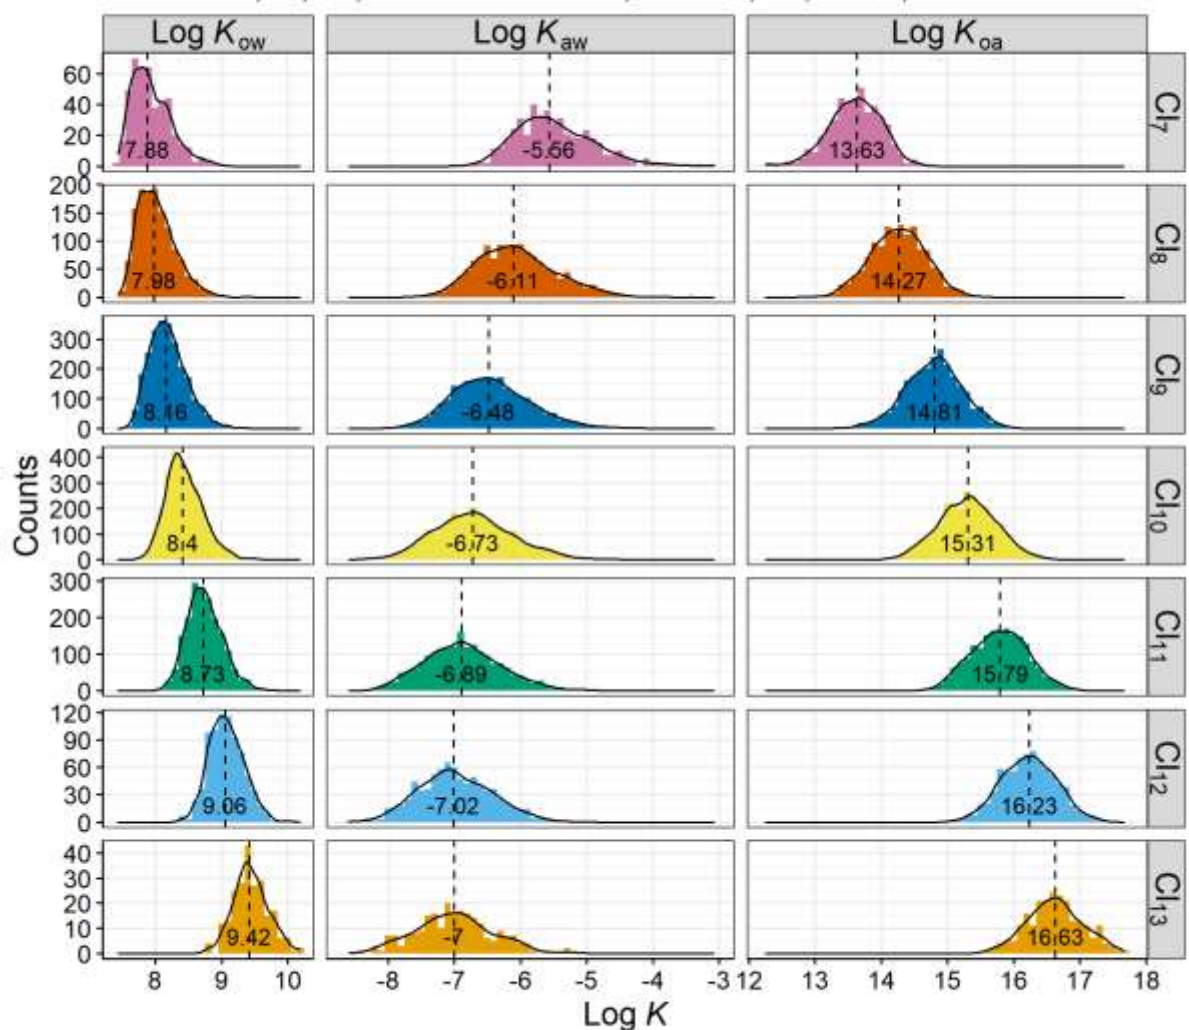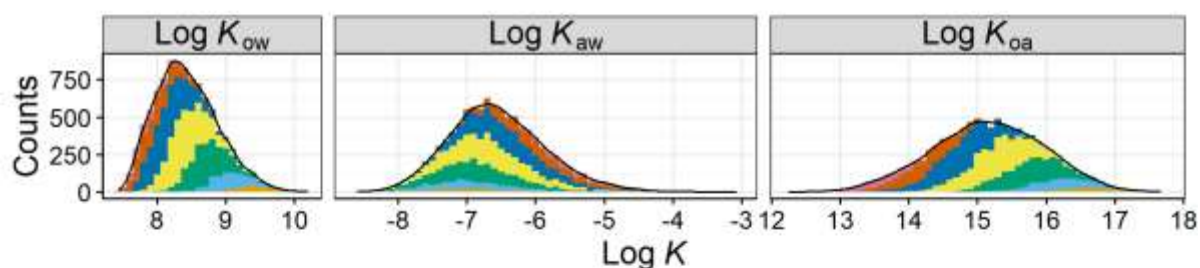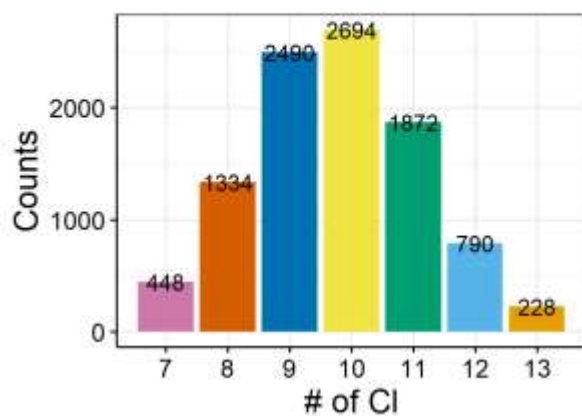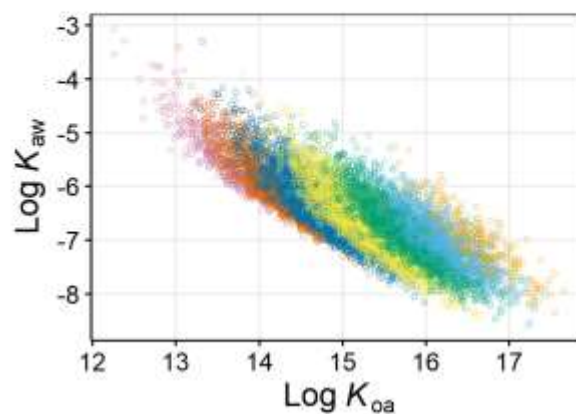



# C<sub>17</sub>, 70 wt% CI

Total counts, 10,000; <100 counts omitted; bin width, 0.1; values, median

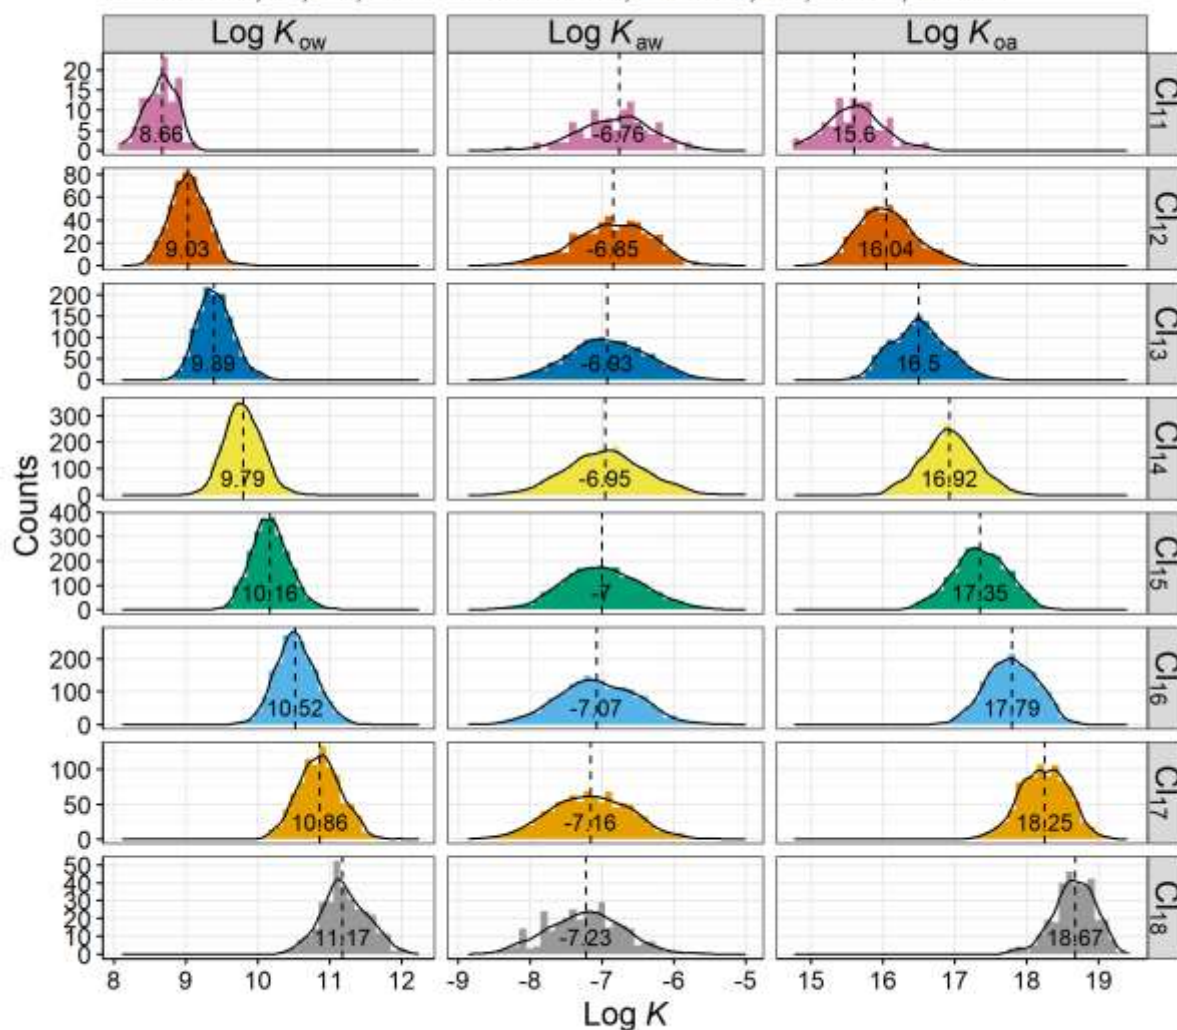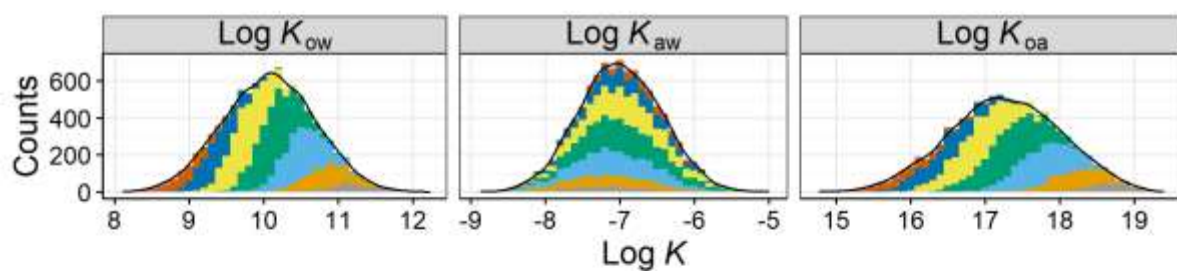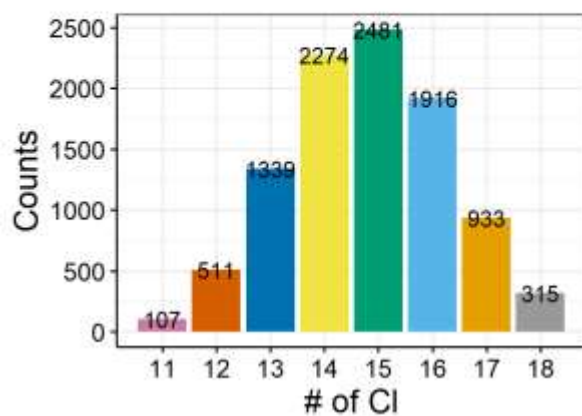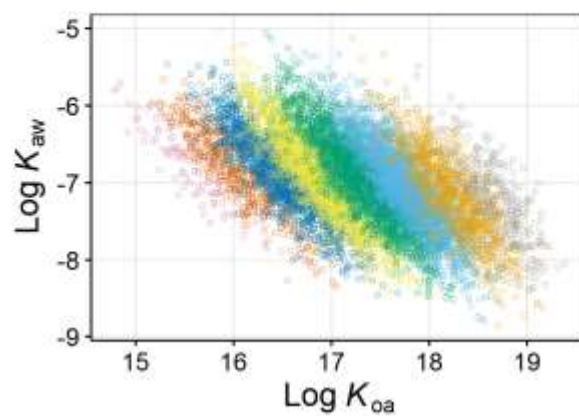

# C<sub>18</sub>, 30 wt% CI

Total counts, 10,000; <100 counts omitted; bin width, 0.1; values, median

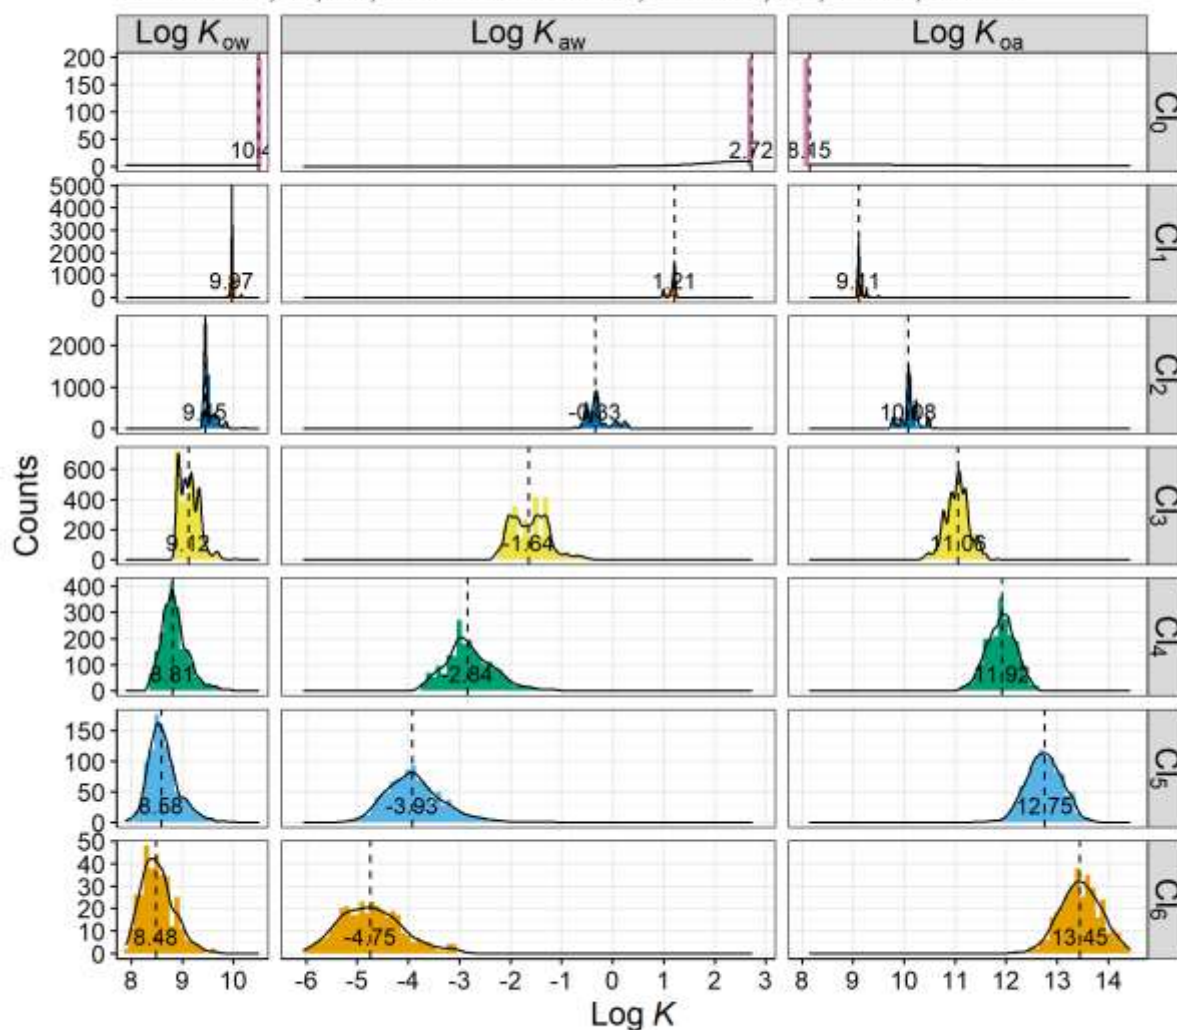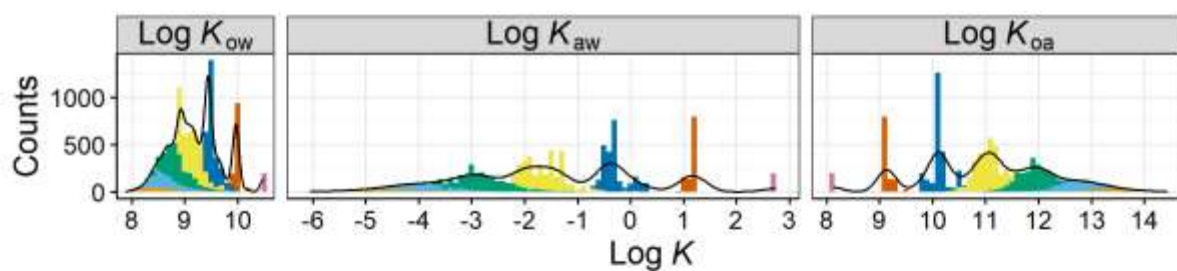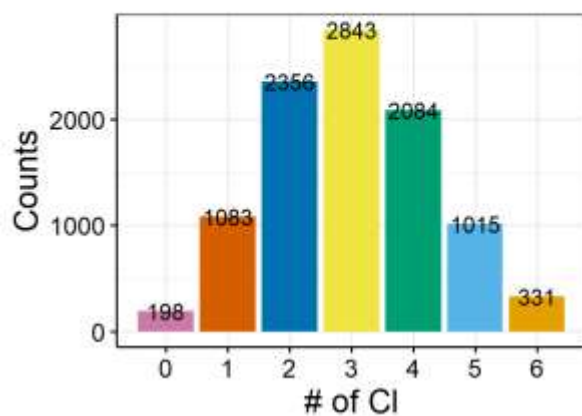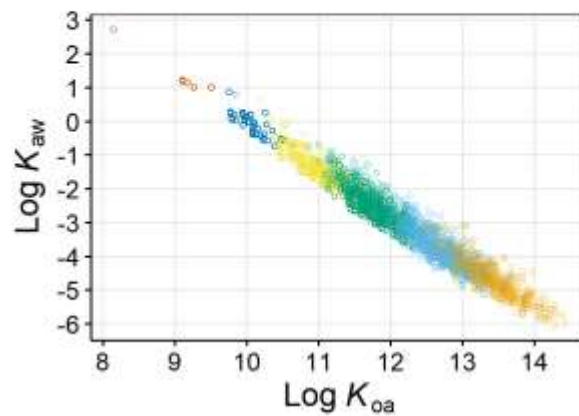

# C<sub>18</sub>, 40 wt% CI

Total counts, 10,000; <100 counts omitted; bin width, 0.1; values, median

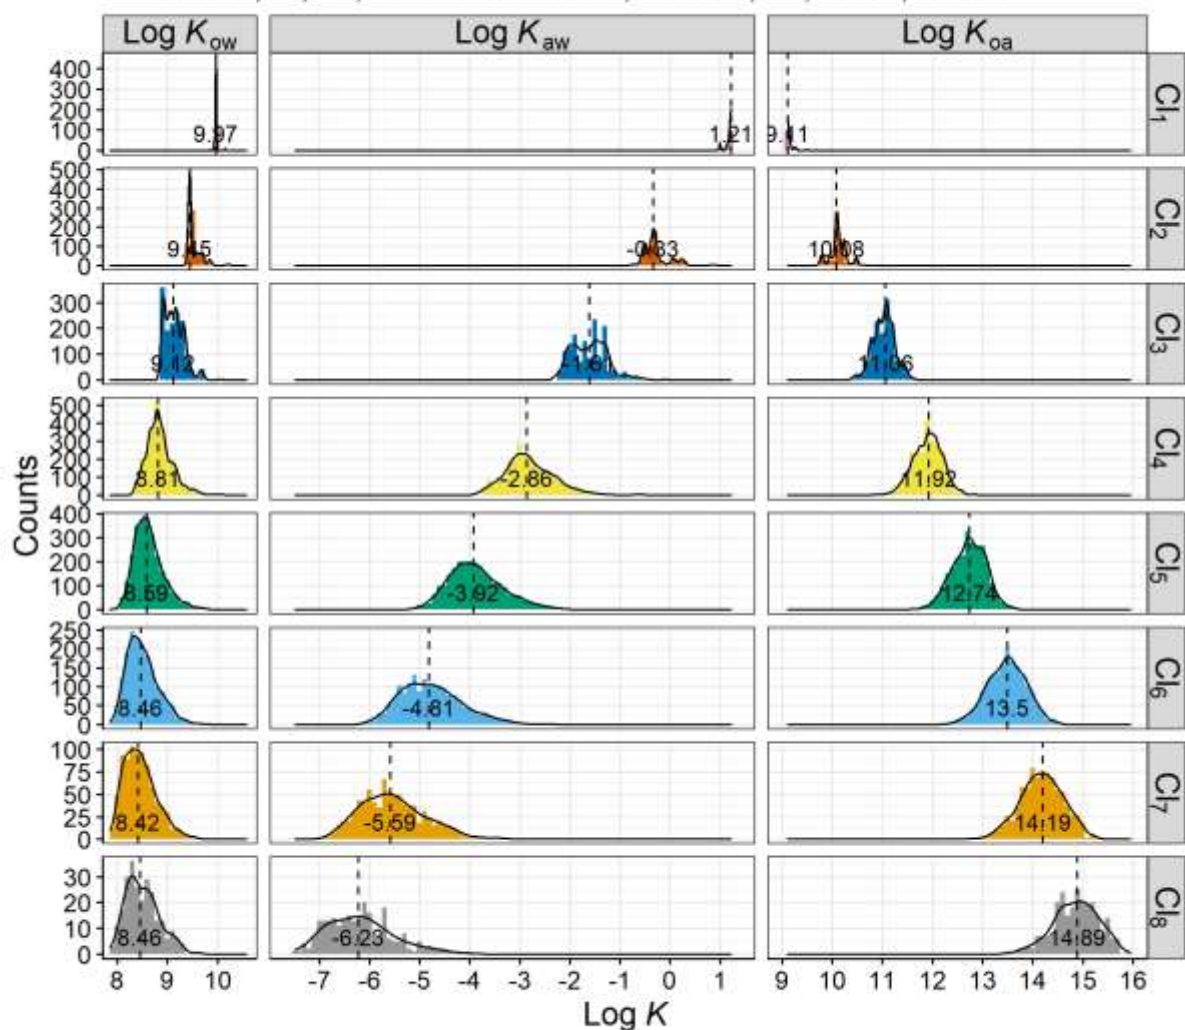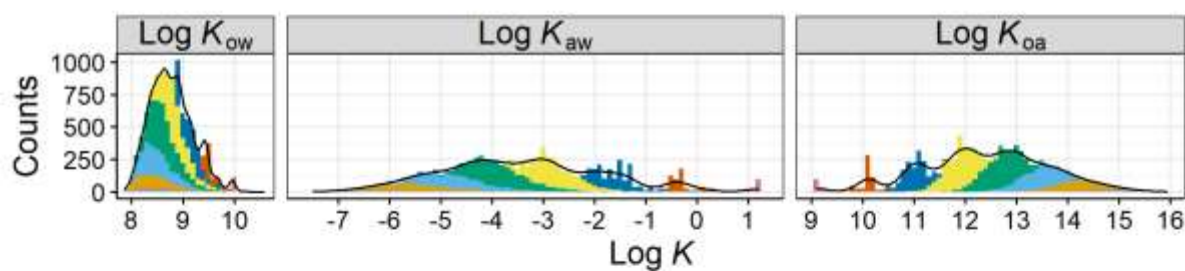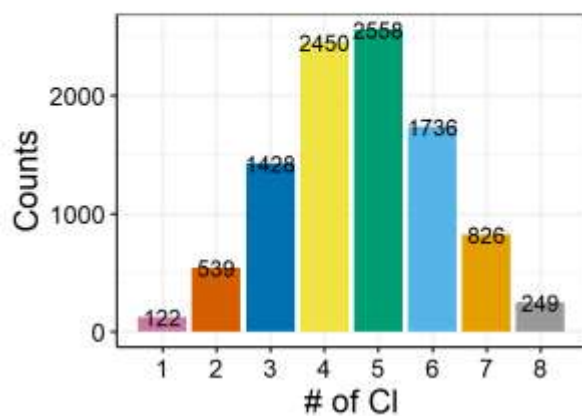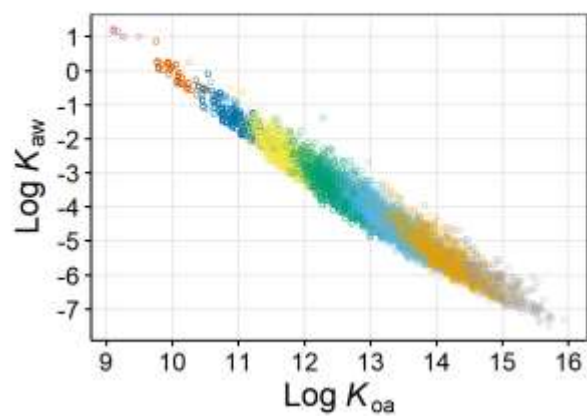



# C<sub>18</sub>, 50 wt% CI

Total counts, 10,000; <100 counts omitted; bin width, 0.1; values, median

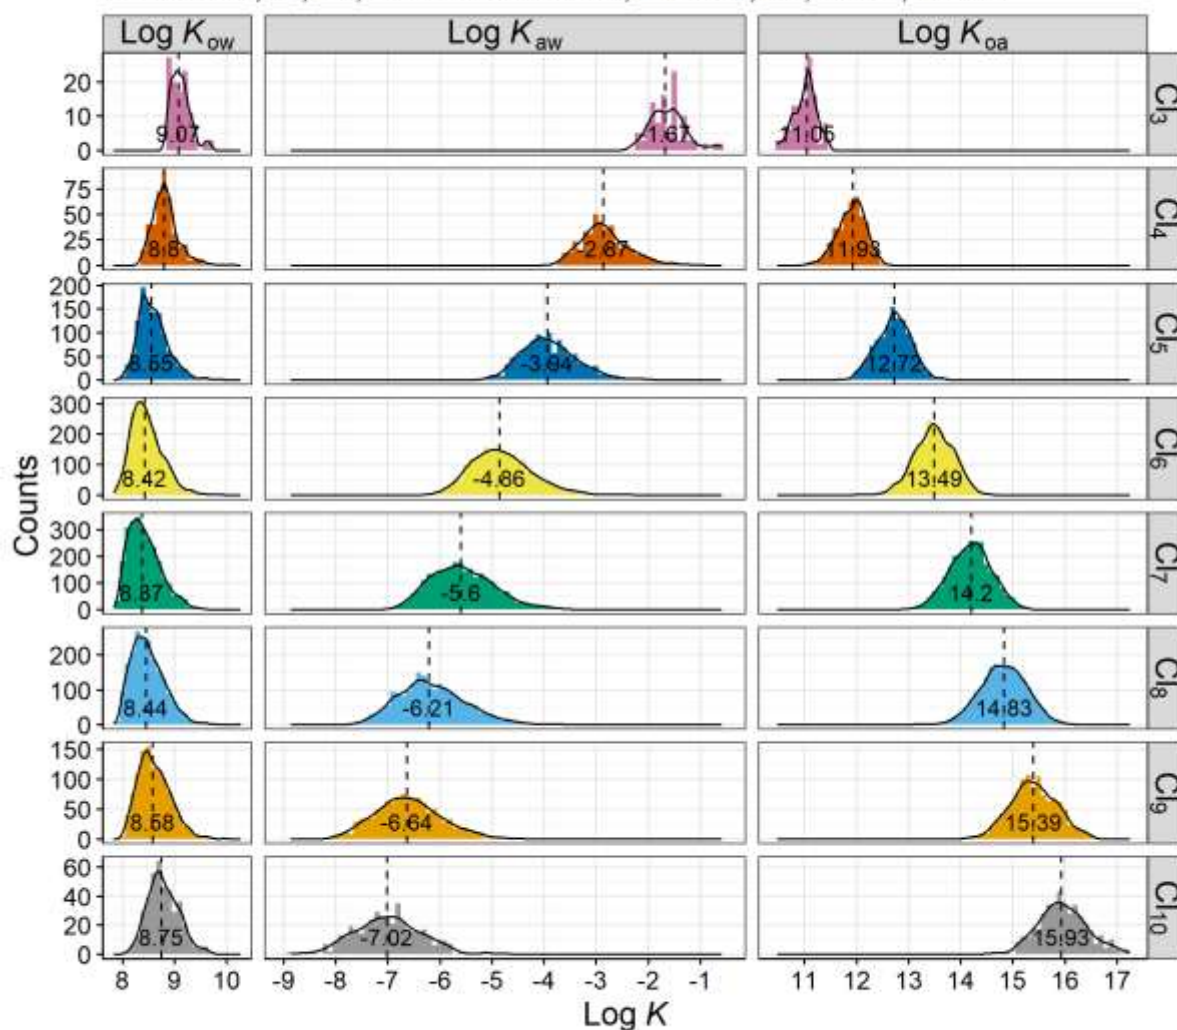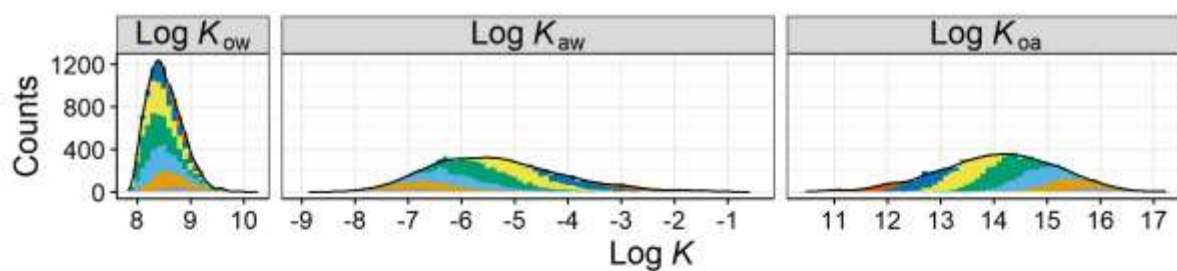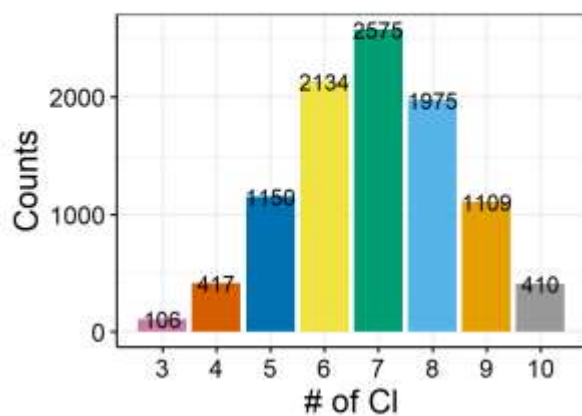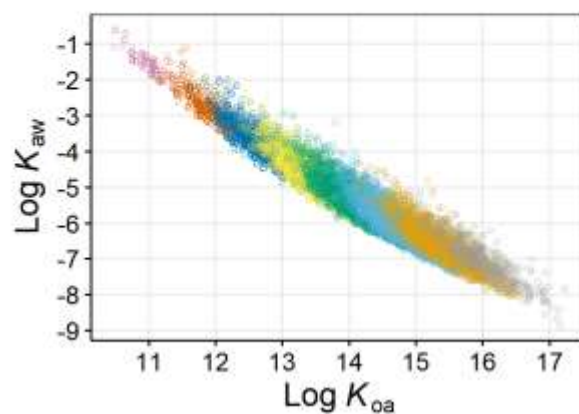

# C<sub>18</sub>, 60 wt% Cl

Total counts, 10,000; <100 counts omitted; bin width, 0.1; values, median

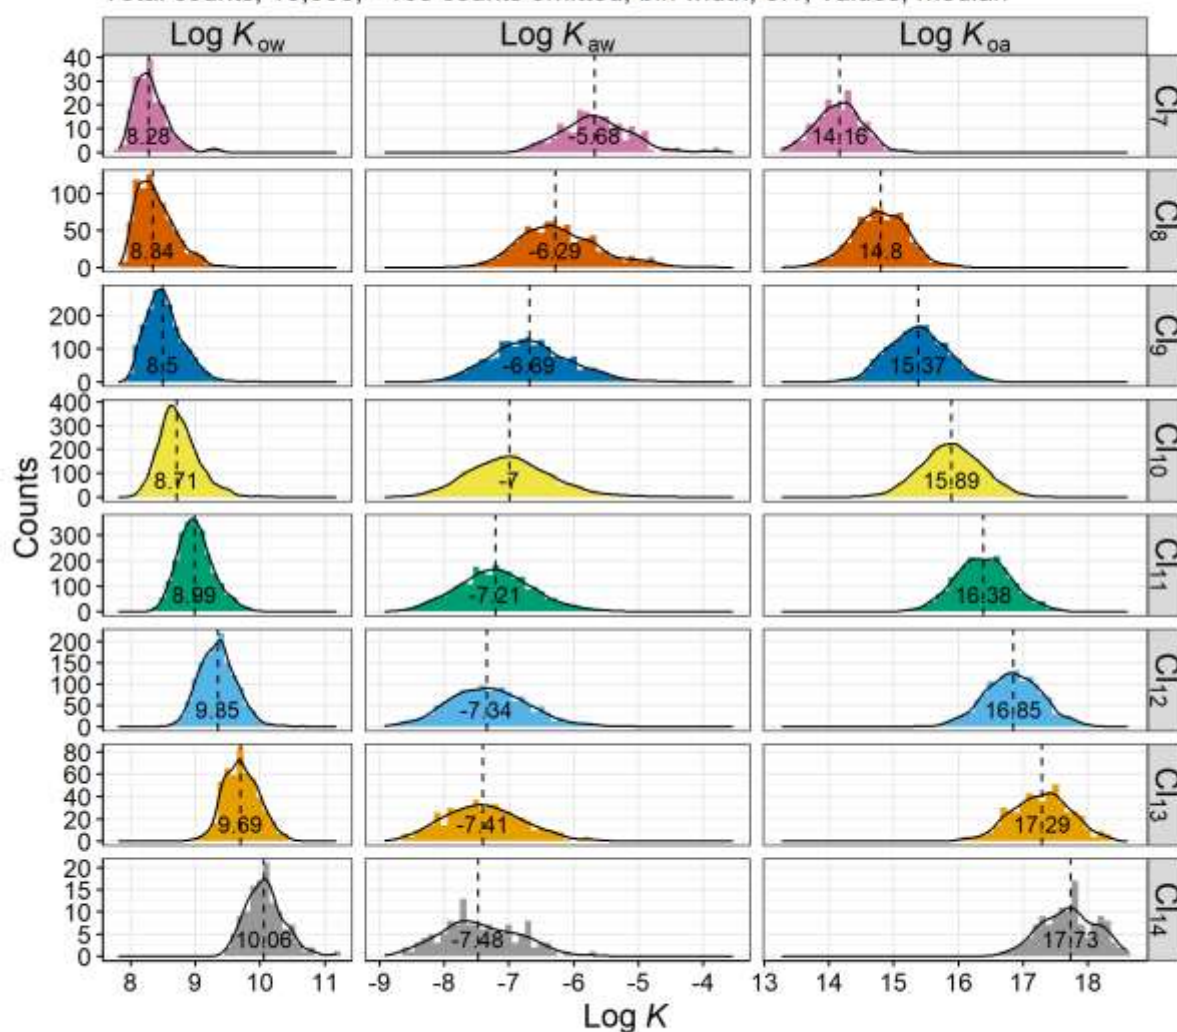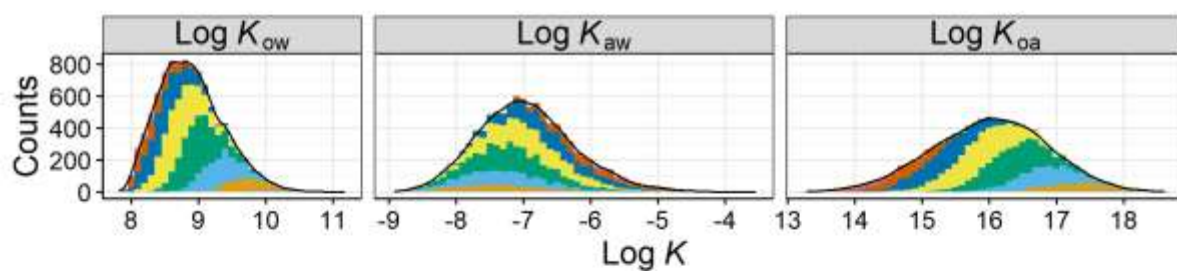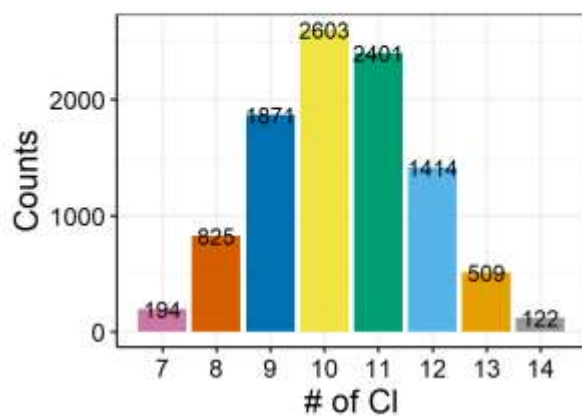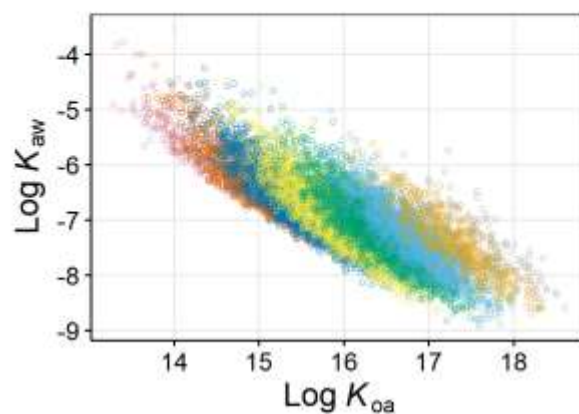

# C<sub>18</sub>, 70 wt% Cl

Total counts, 10,000; <100 counts omitted; bin width, 0.1; values, median

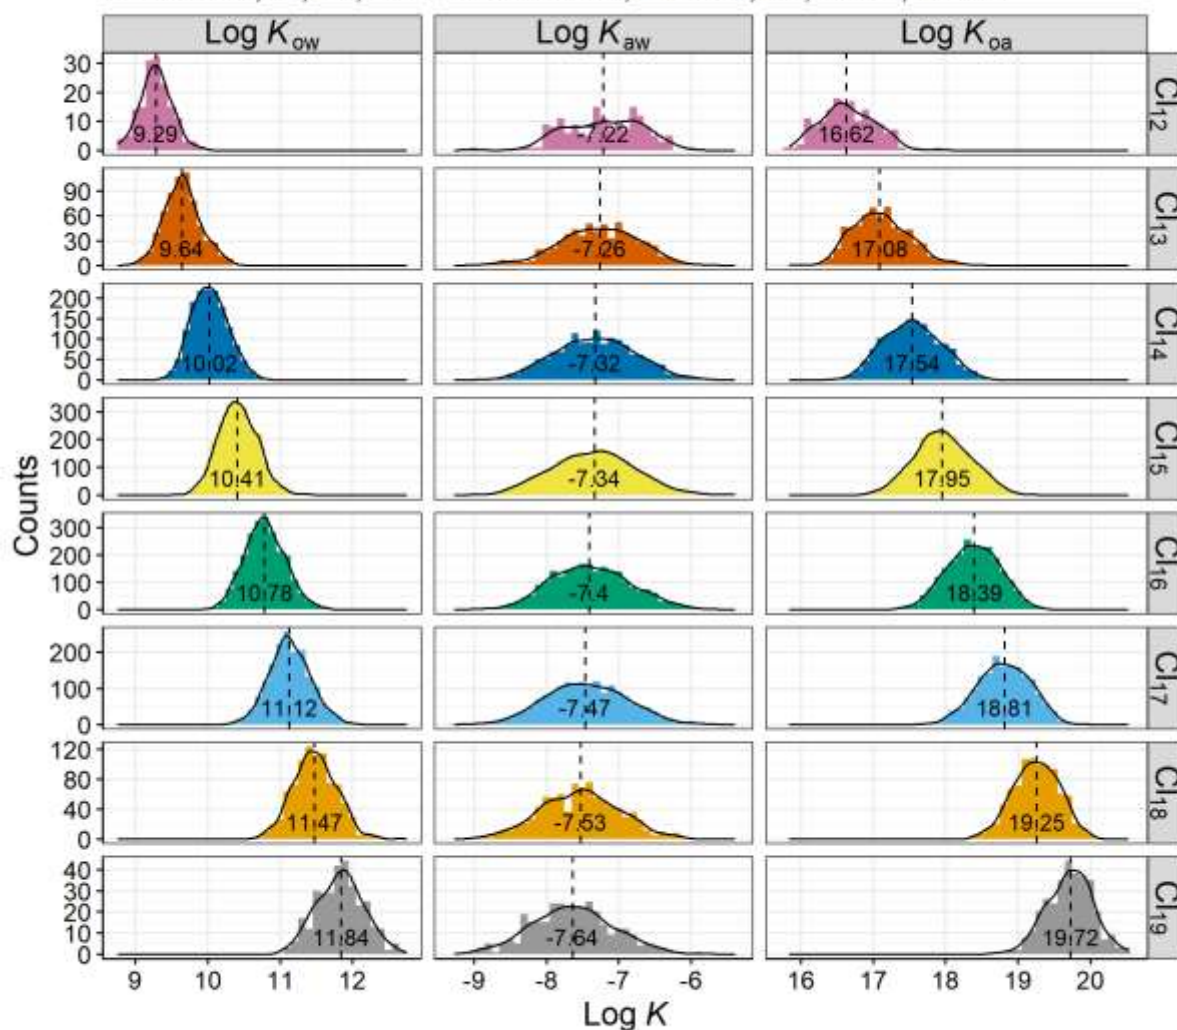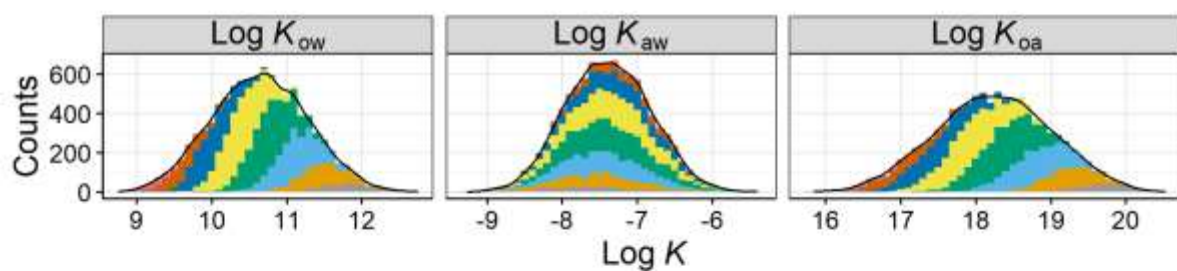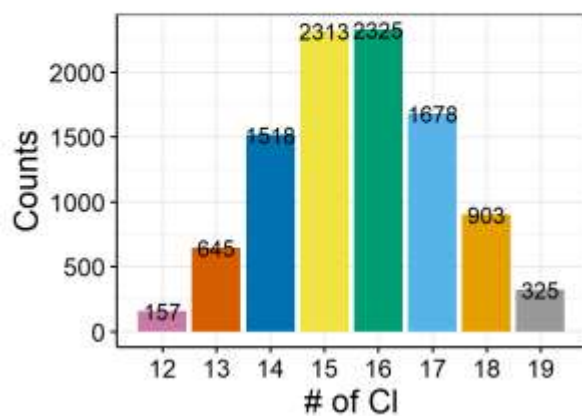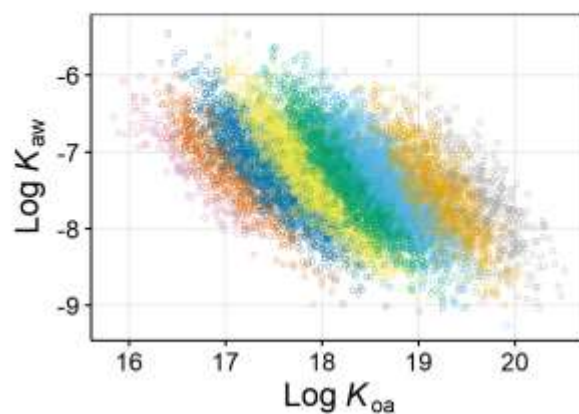



# C<sub>19</sub>, 30 wt% Cl

Total counts, 10,000; <100 counts omitted; bin width, 0.1; values, median

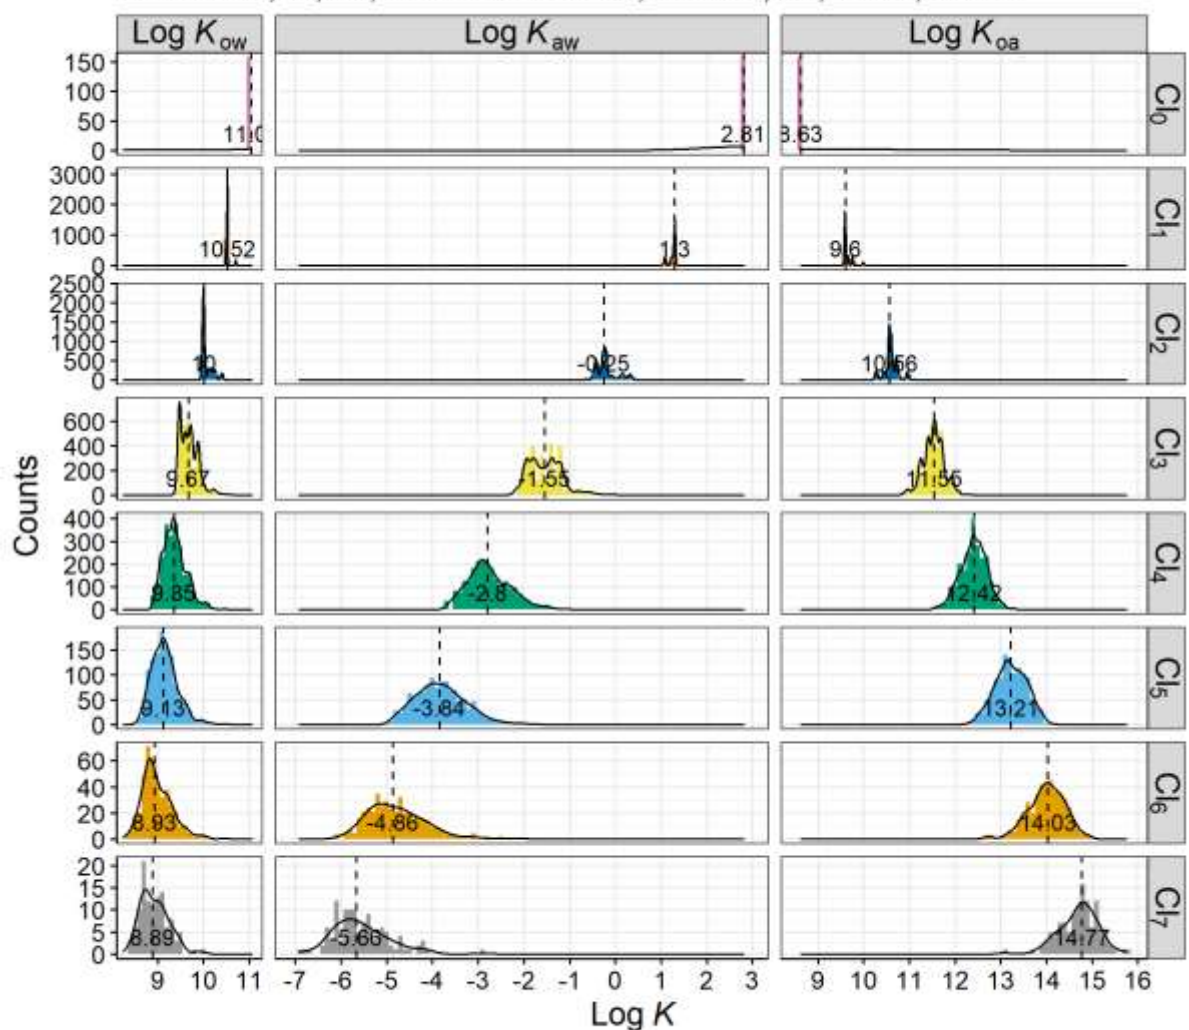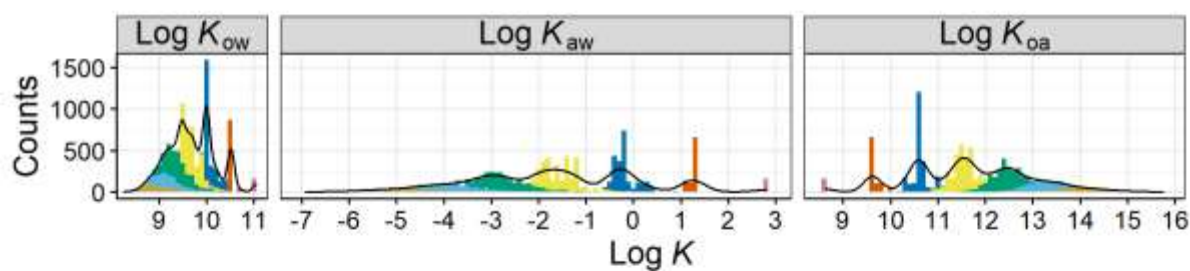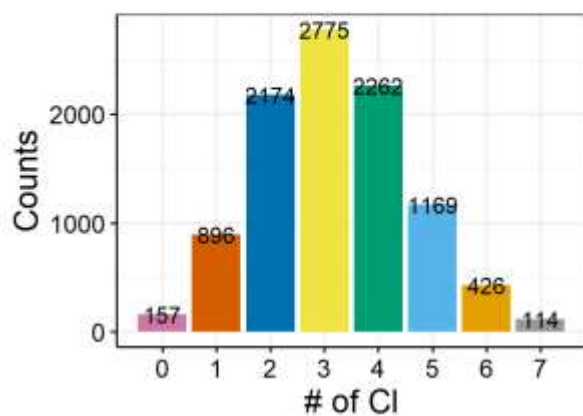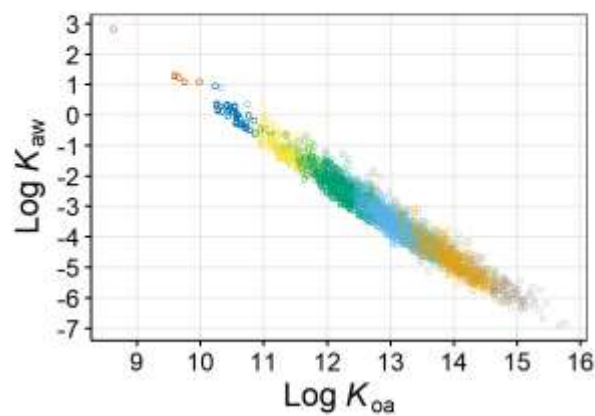

# C<sub>19</sub>, 40 wt% Cl

Total counts, 10,000; <100 counts omitted; bin width, 0.1; values, median

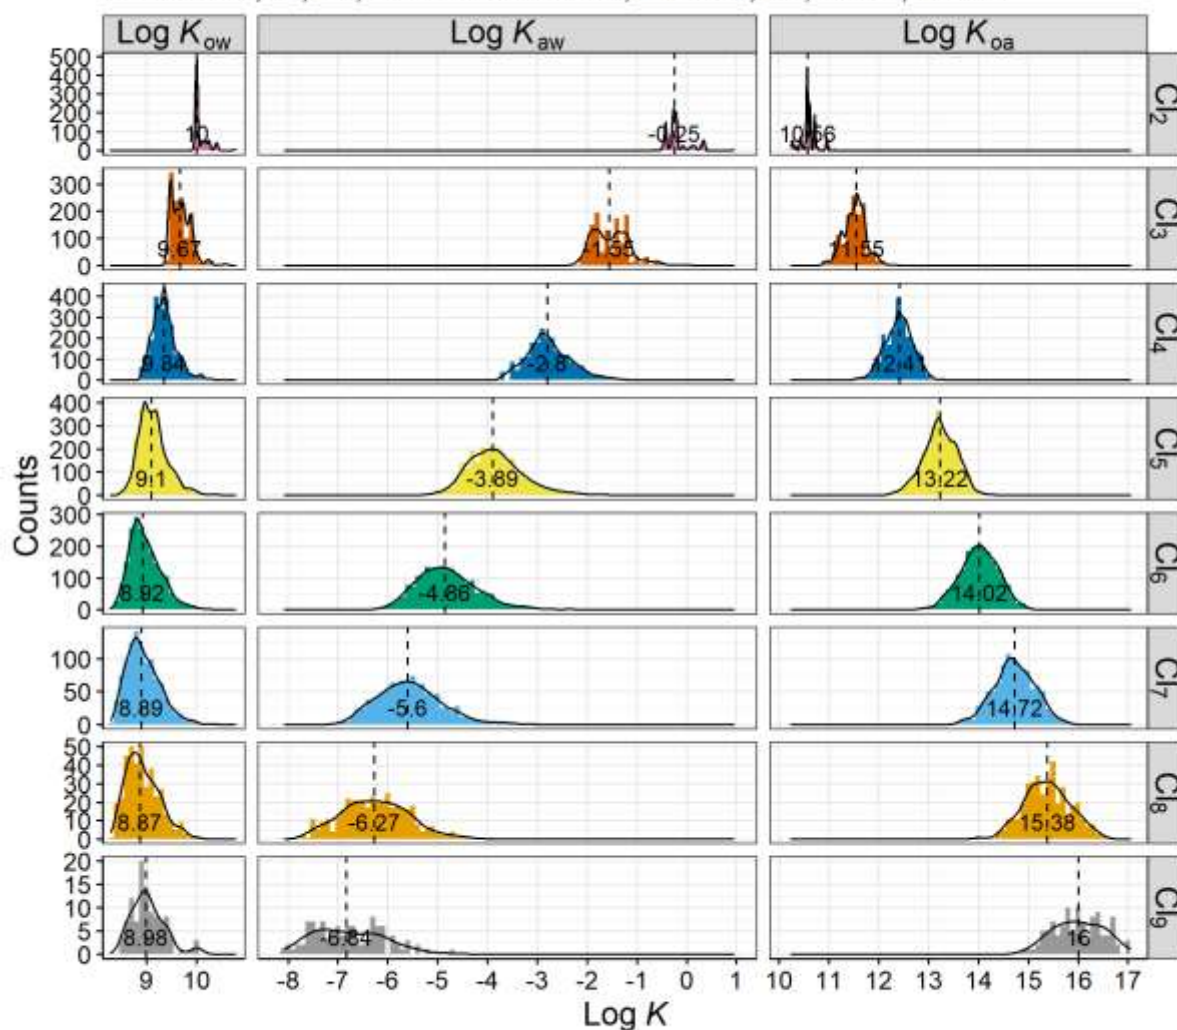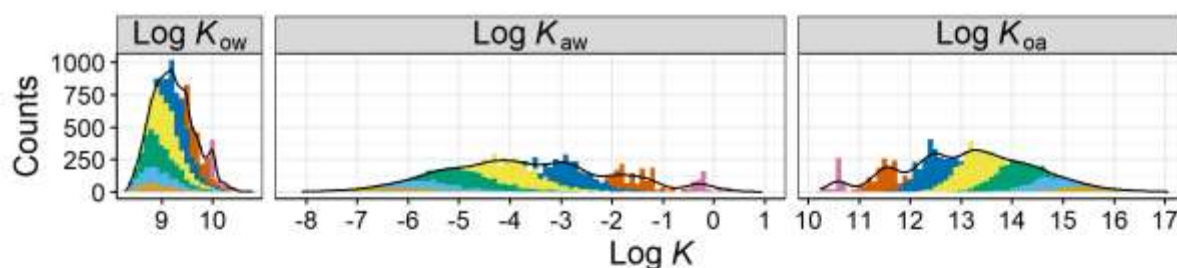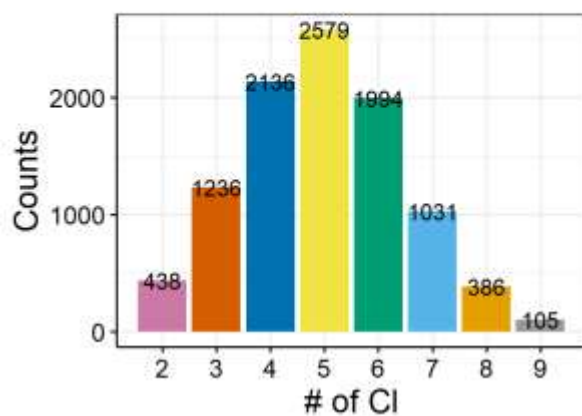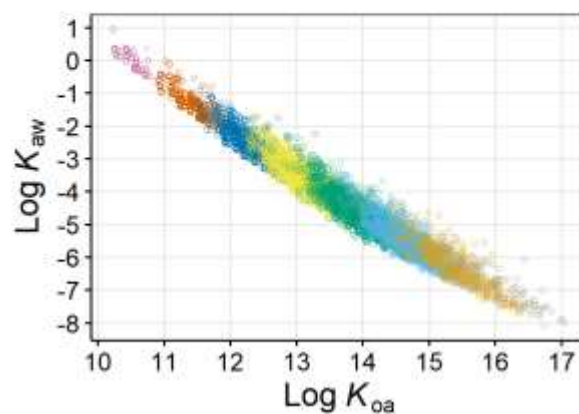

# C<sub>19</sub>, 50 wt% CI

Total counts, 10,000; <100 counts omitted; bin width, 0.1; values, median

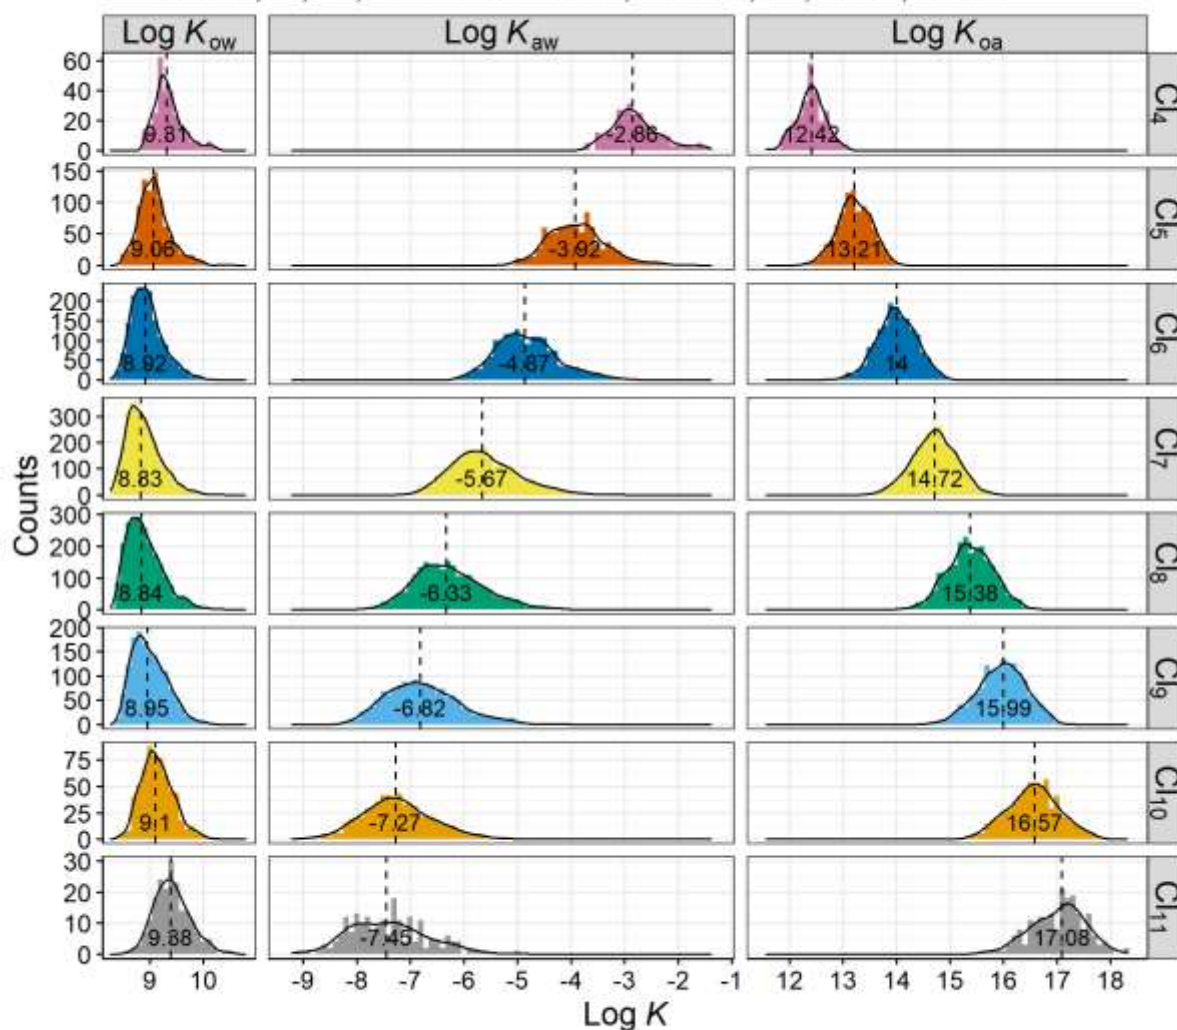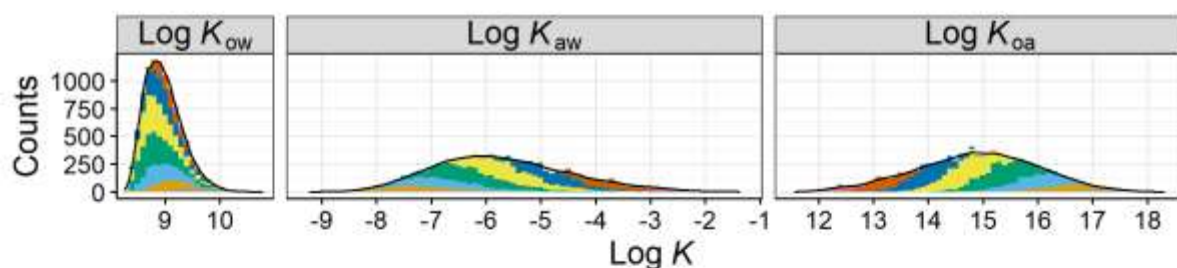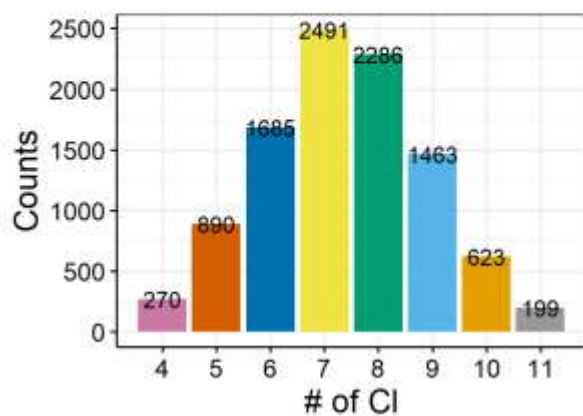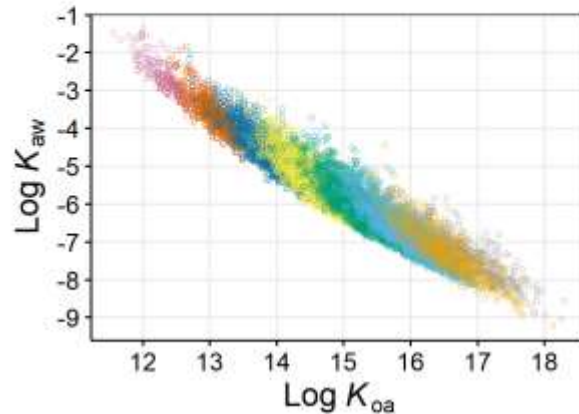



# C<sub>19</sub>, 60 wt% CI

Total counts, 10,000; <100 counts omitted; bin width, 0.1; values, median

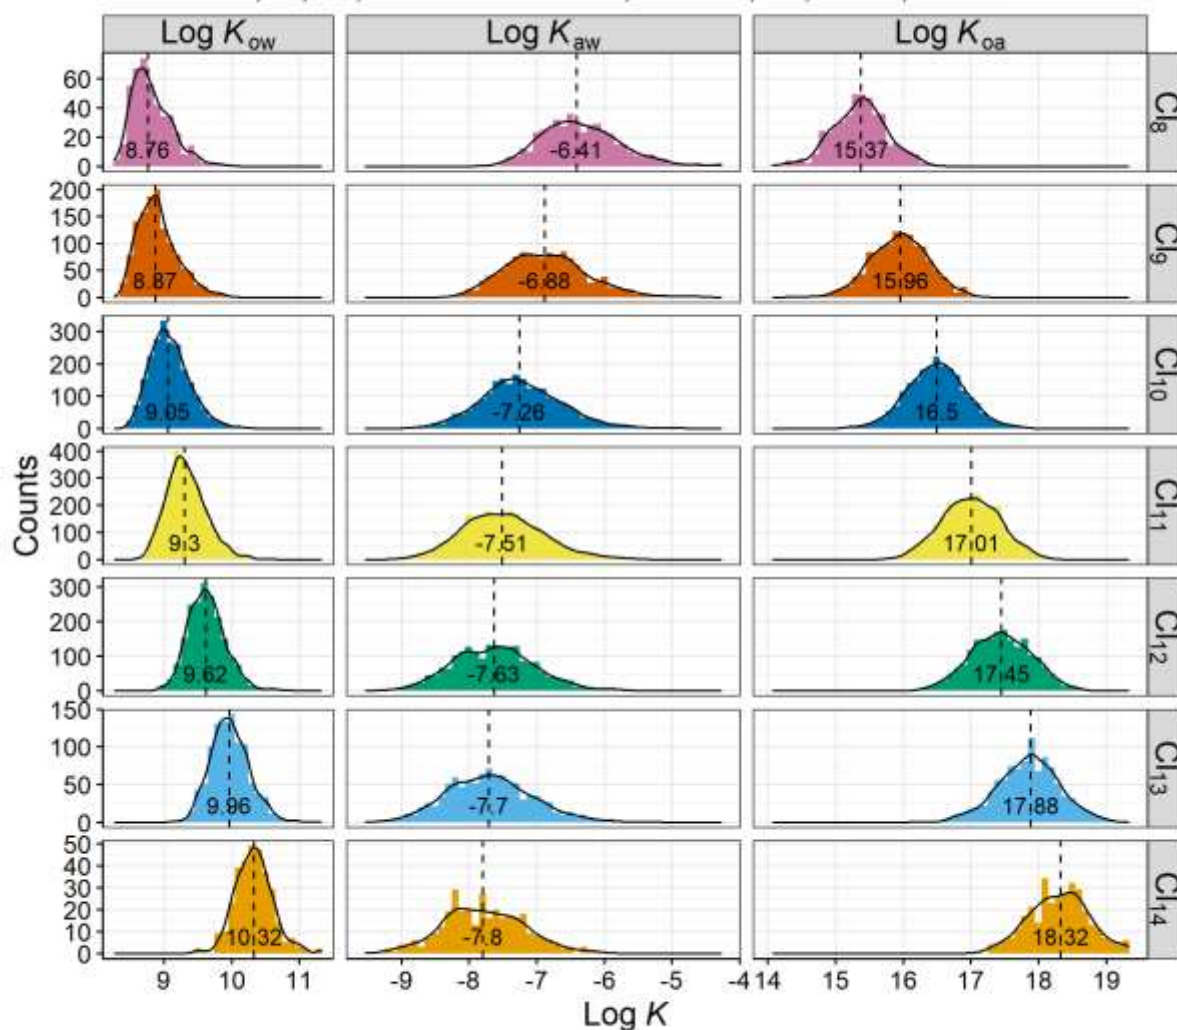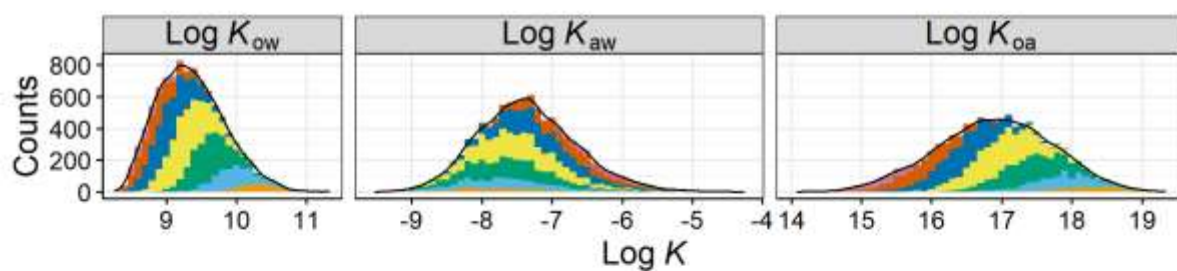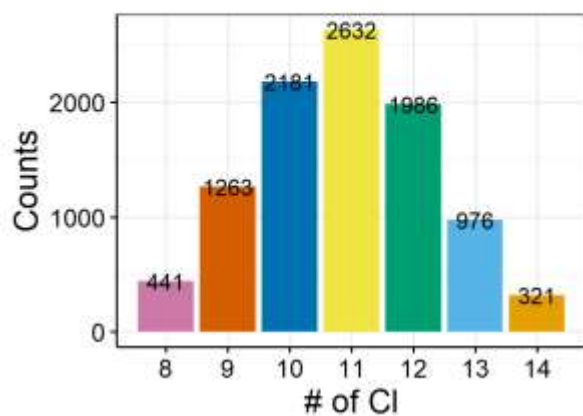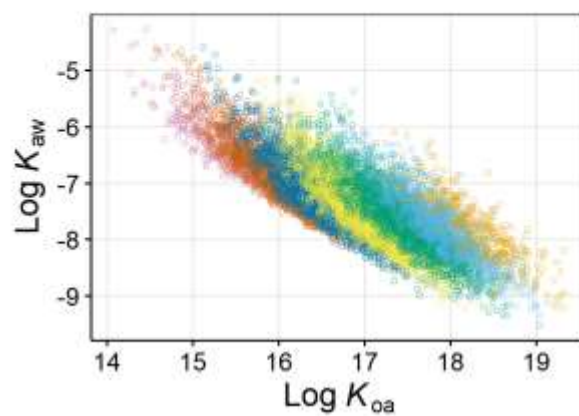

# C<sub>19</sub>, 70 wt% CI

Total counts, 10,000; <100 counts omitted; bin width, 0.1; values, median

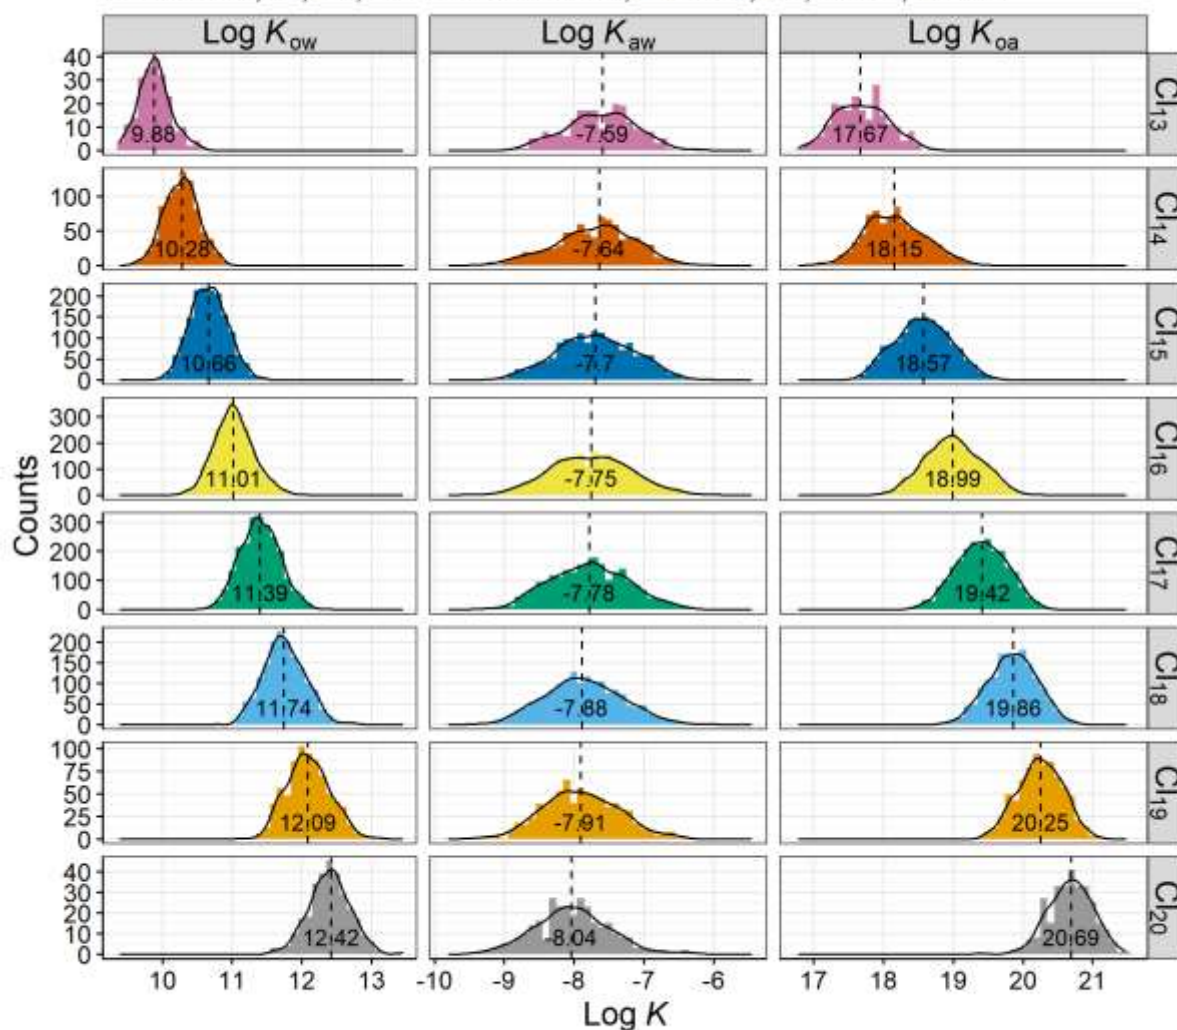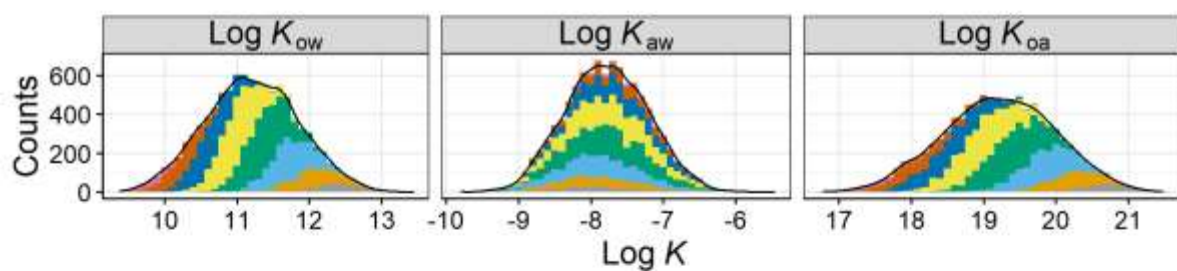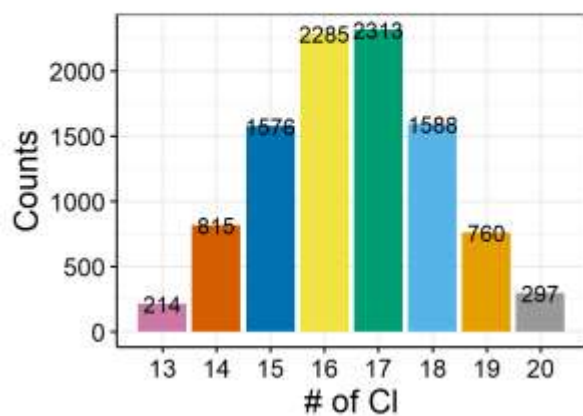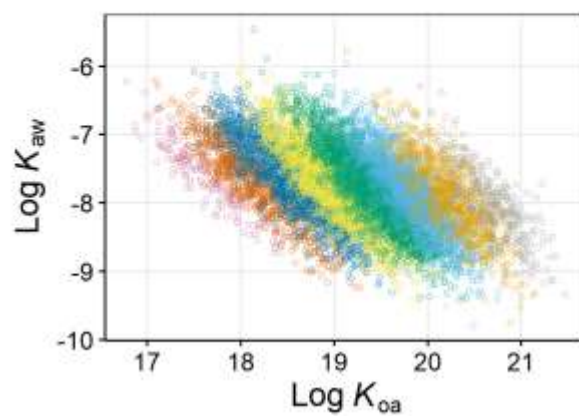

# C<sub>20</sub>, 30 wt% Cl

Total counts, 10,000; <100 counts omitted; bin width, 0.1; values, median

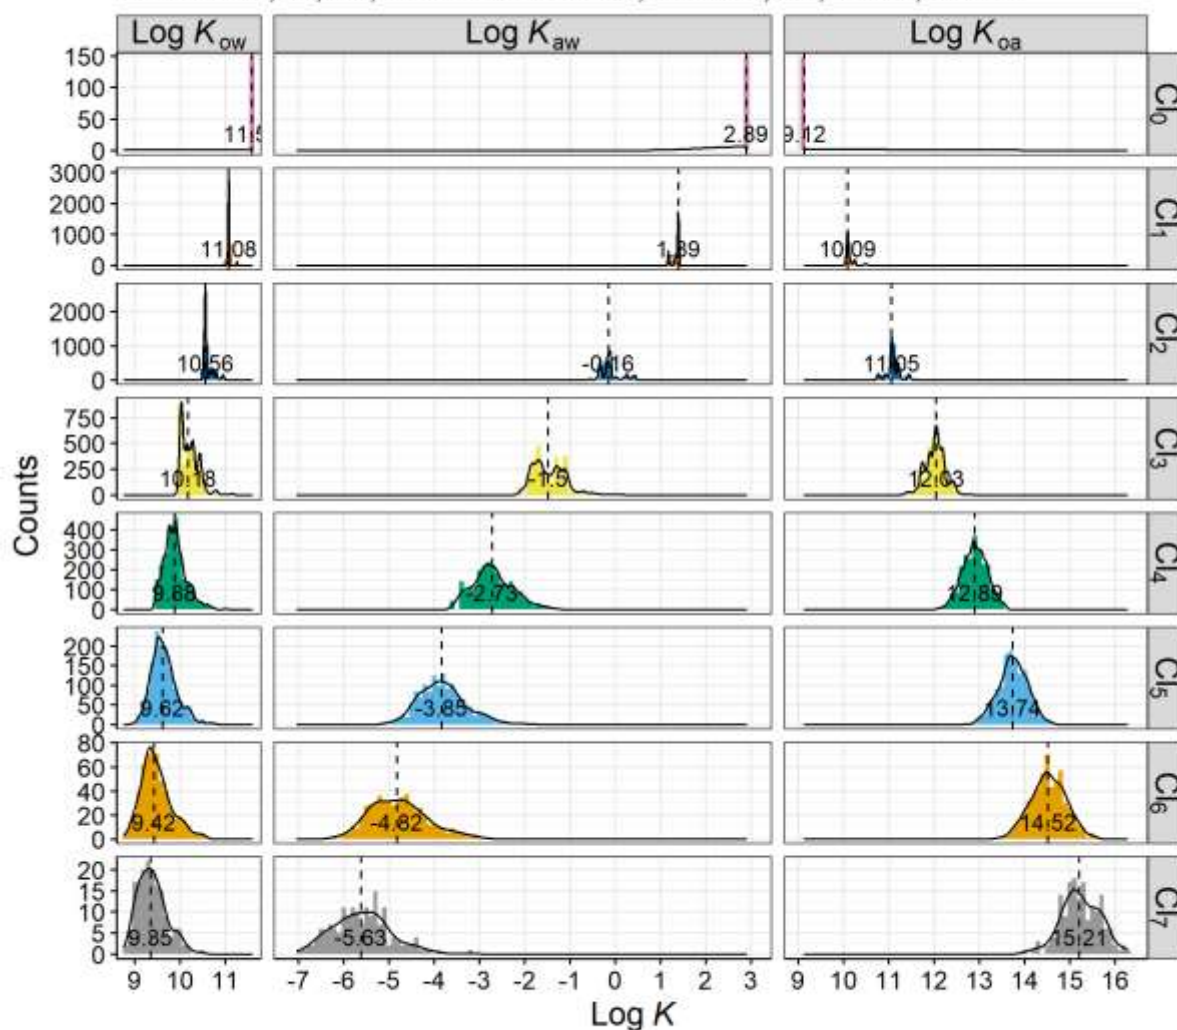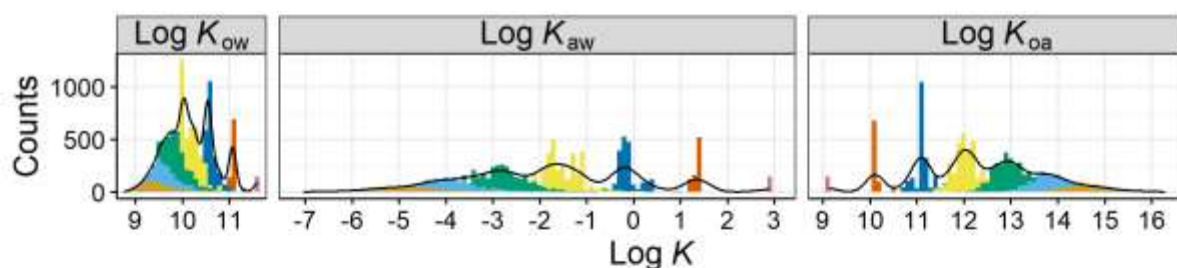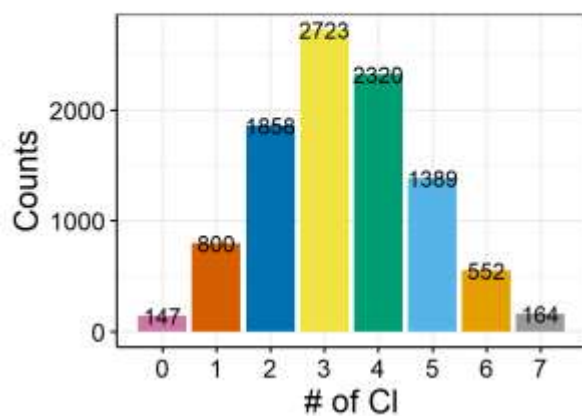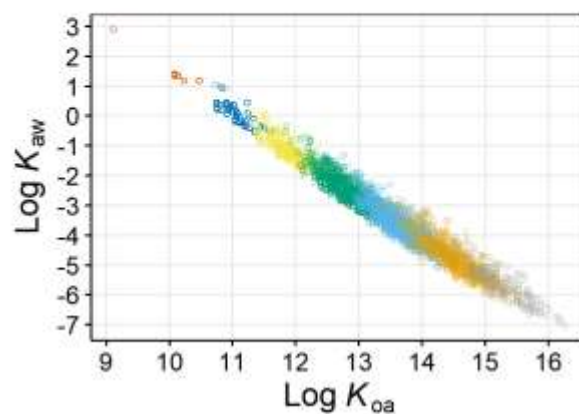



# C<sub>20</sub>, 40 wt% Cl

Total counts, 10,000; <100 counts omitted; bin width, 0.1; values, median

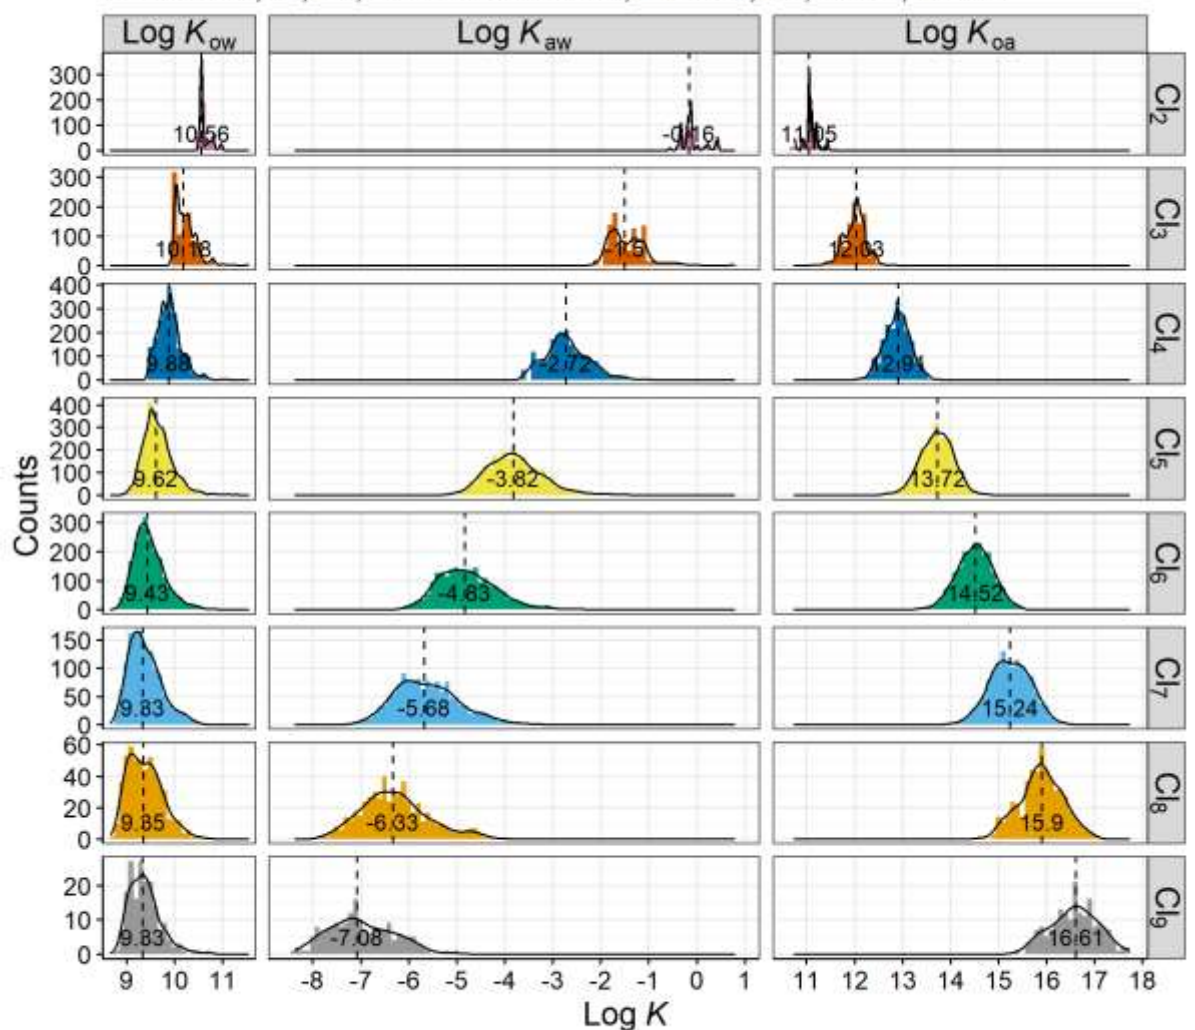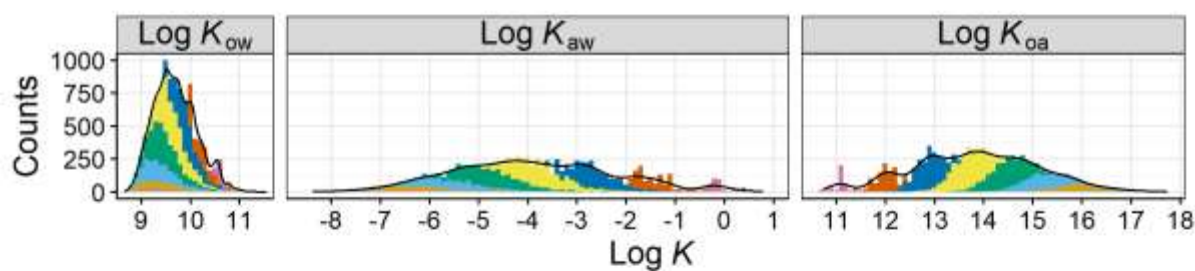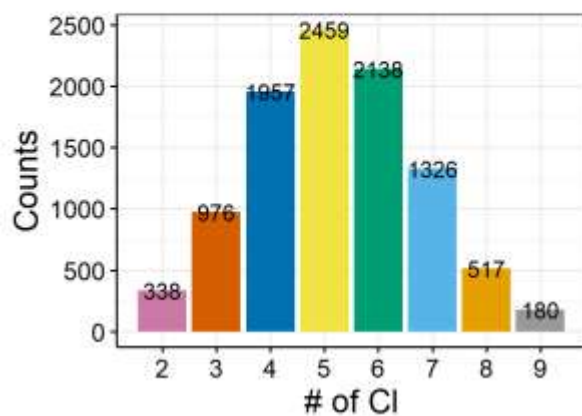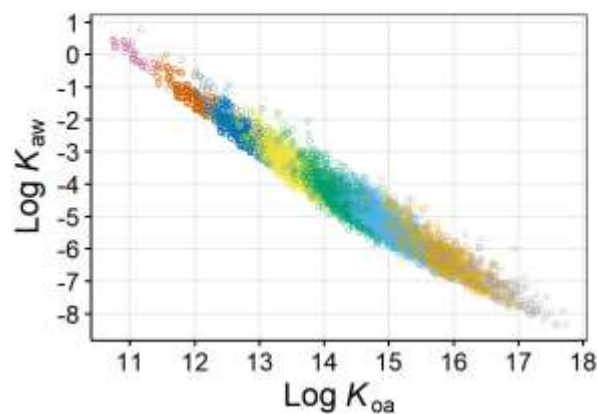

# C<sub>20</sub>, 50 wt% CI

Total counts, 10,000; <100 counts omitted; bin width, 0.1; values, median

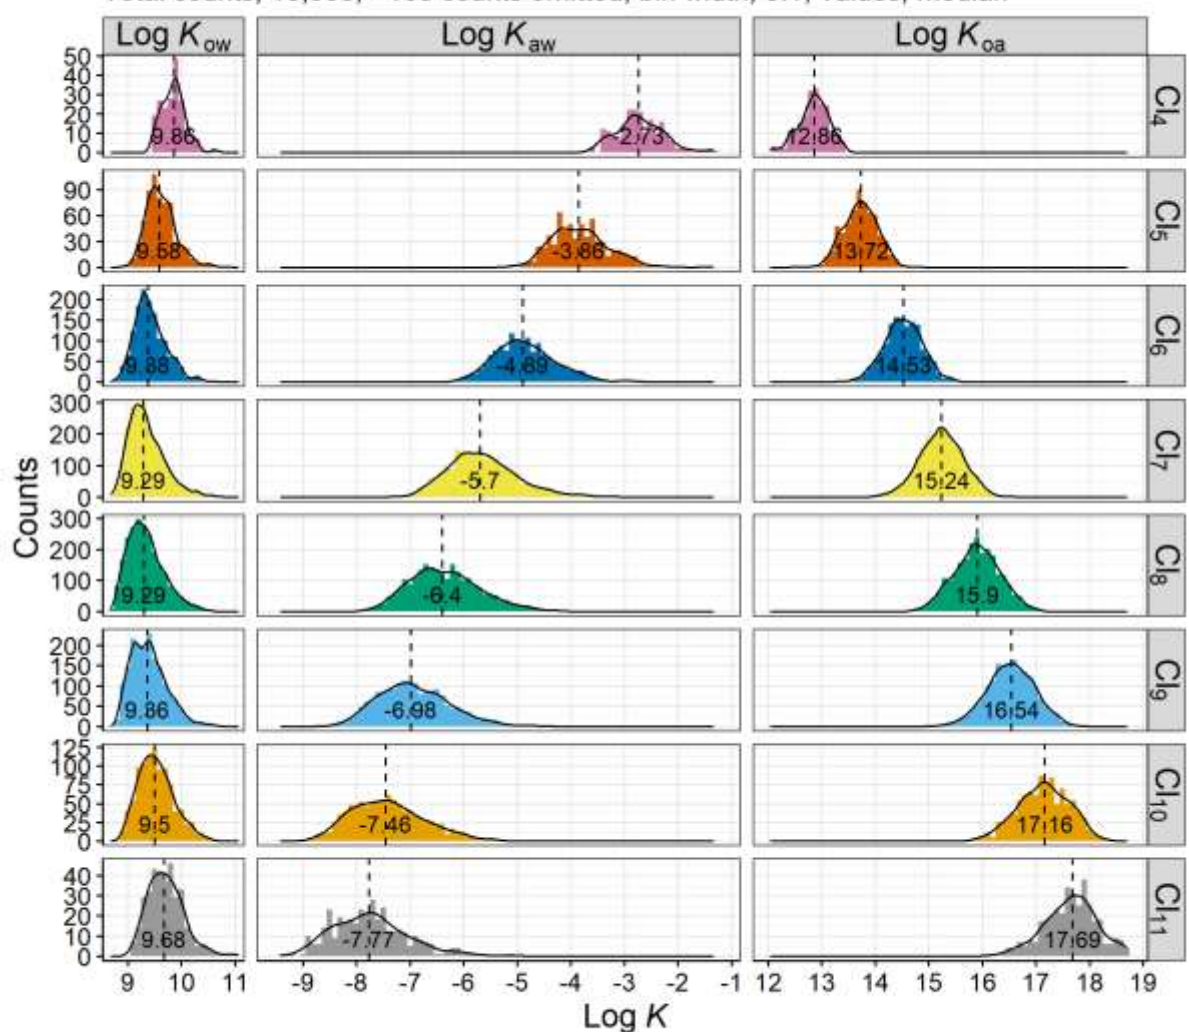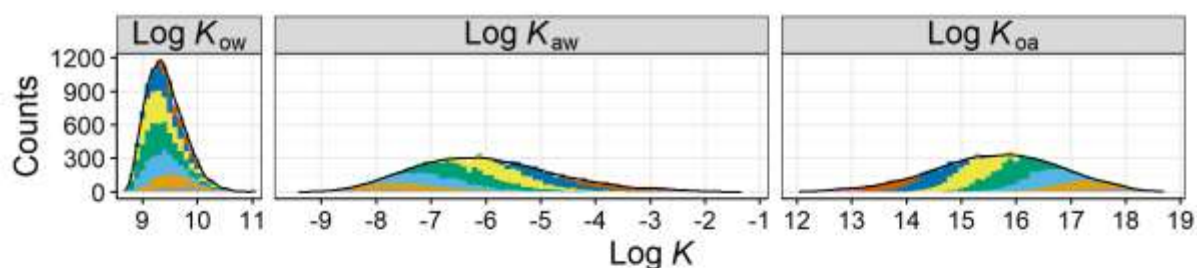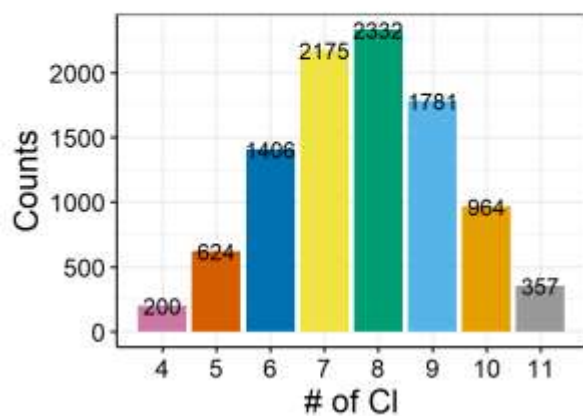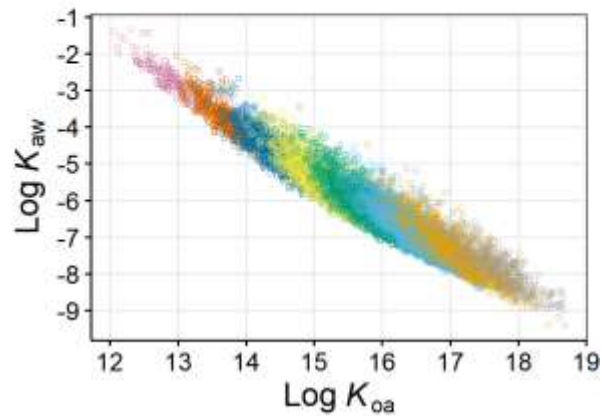

# C<sub>20</sub>, 60 wt% Cl

Total counts, 10,000; <100 counts omitted; bin width, 0.1; values, median

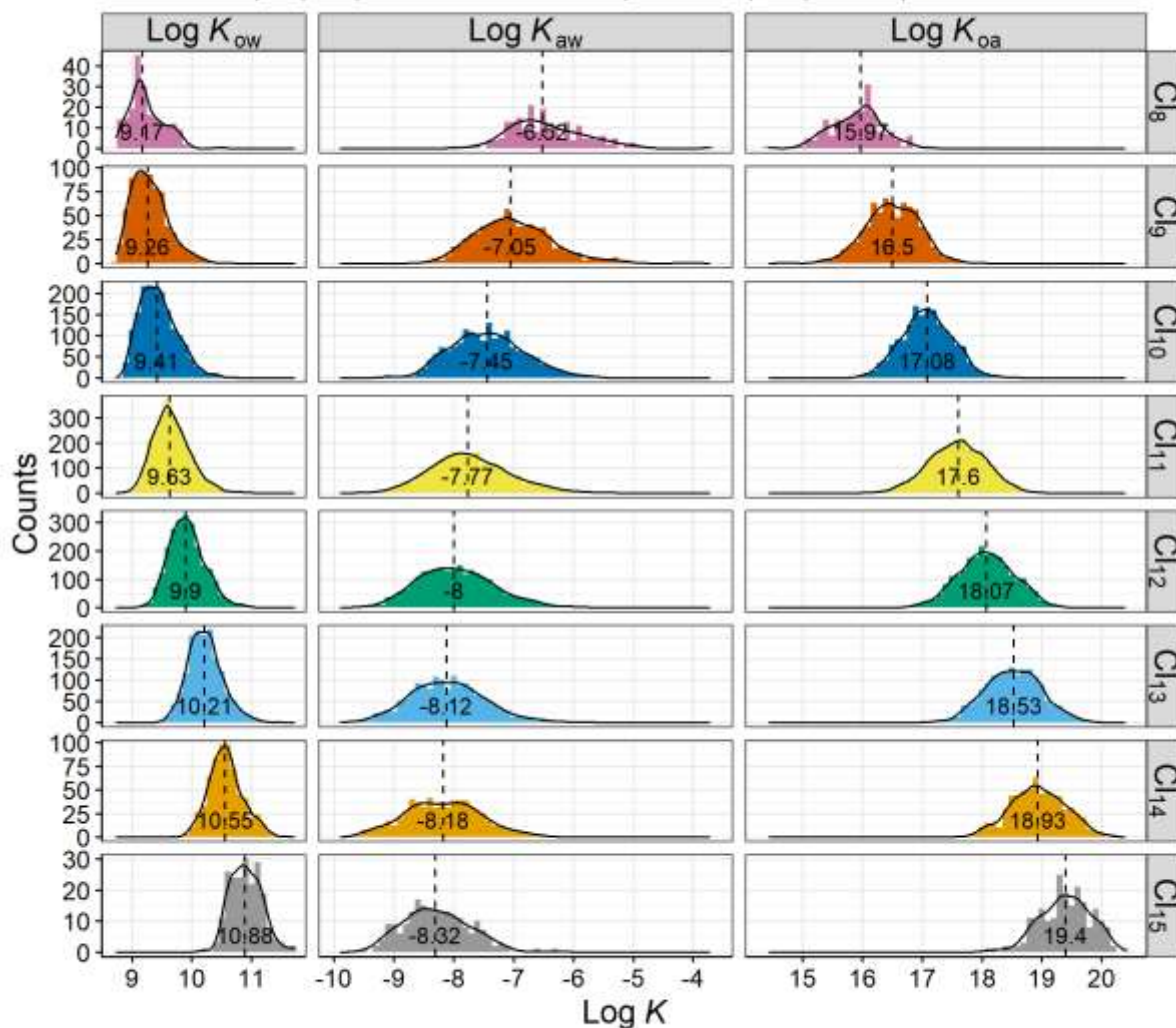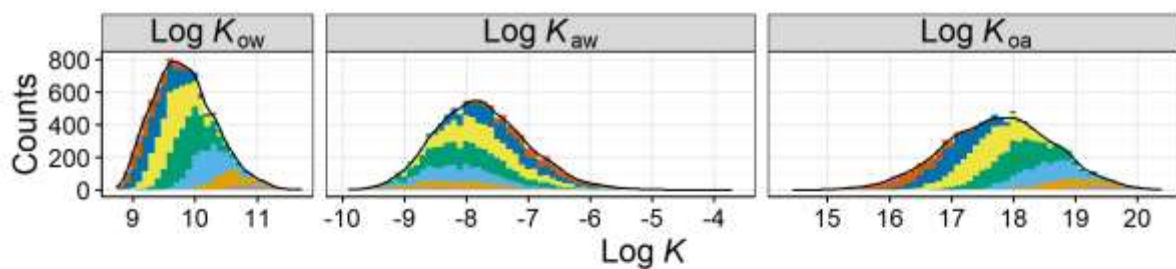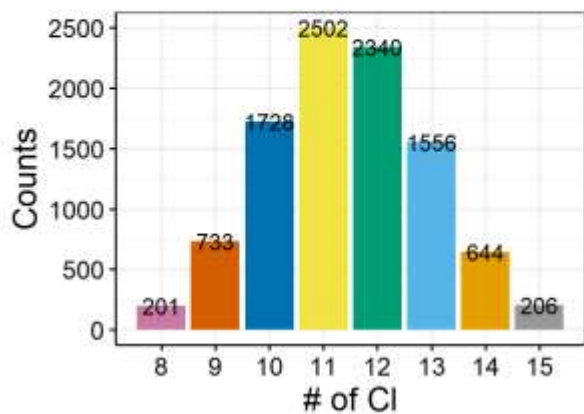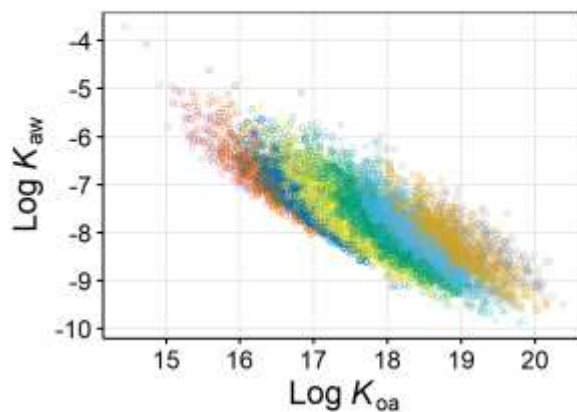



## C<sub>20</sub>, 70 wt% CI

Total counts, 10,000; <100 counts omitted; bin width, 0.1; values, median

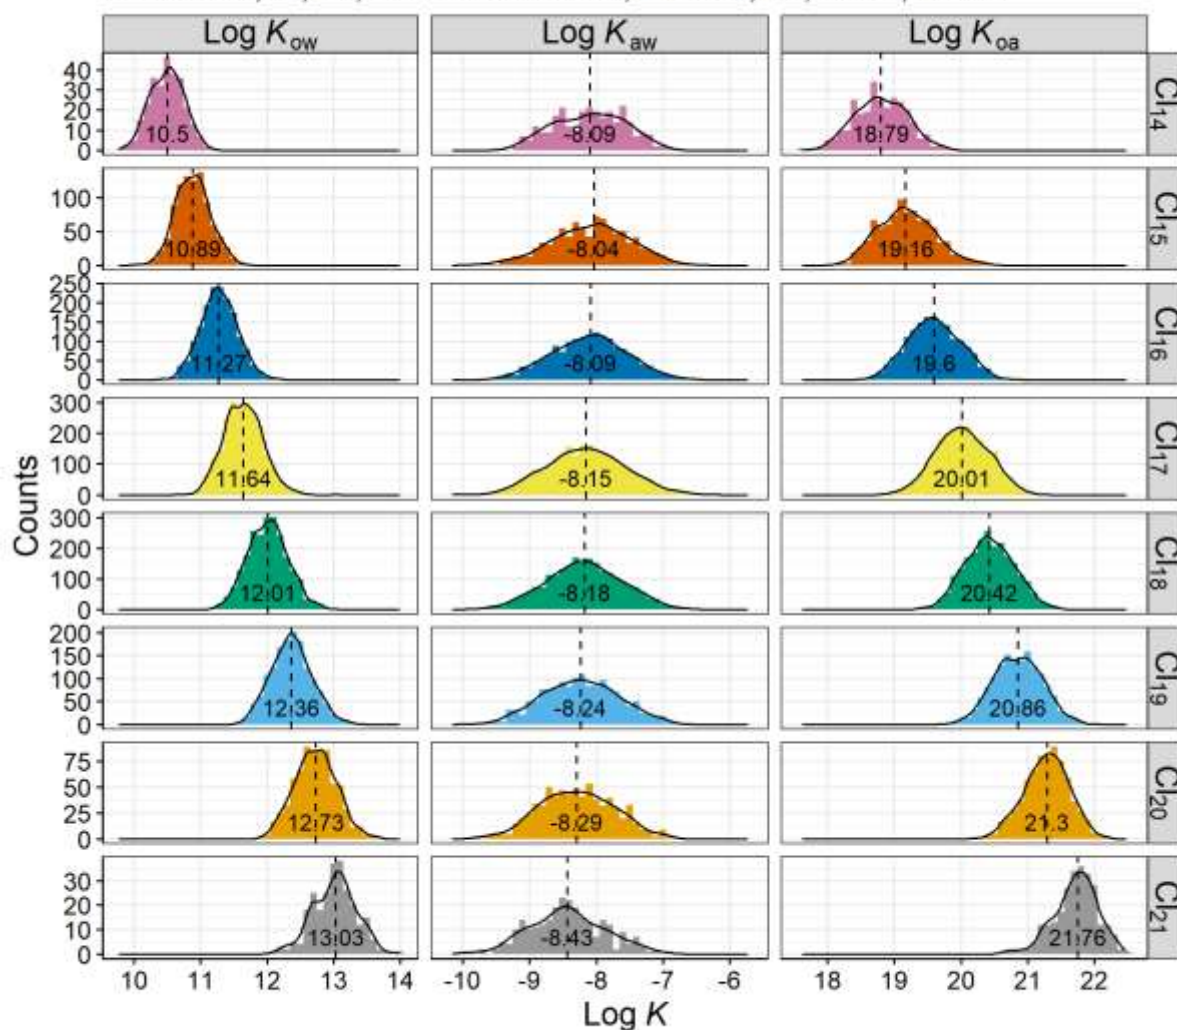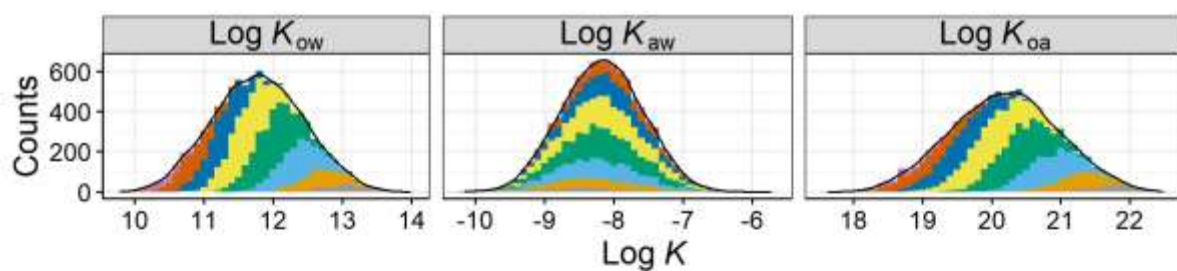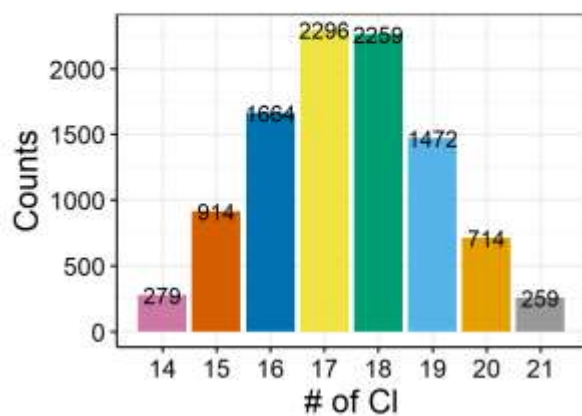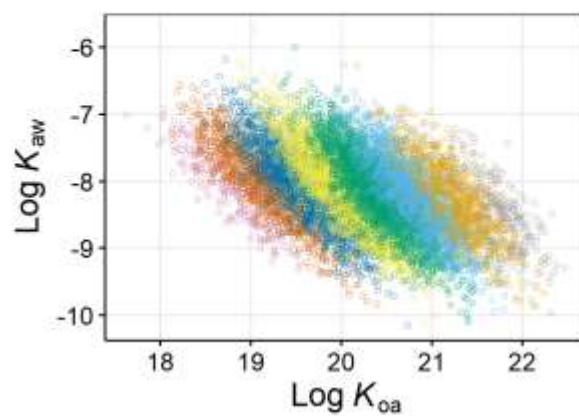

**Property distributions of CP mixtures with a carbon-chain length of C<sub>10–20</sub> and a chlorination degree of 30–70 wt%:  
log VP, log  $K_{aw}$ , log  $S_w$**

# C10, 30wt% CI

Total counts, 10,000; <100 counts omitted; bin width, 0.1; values, median

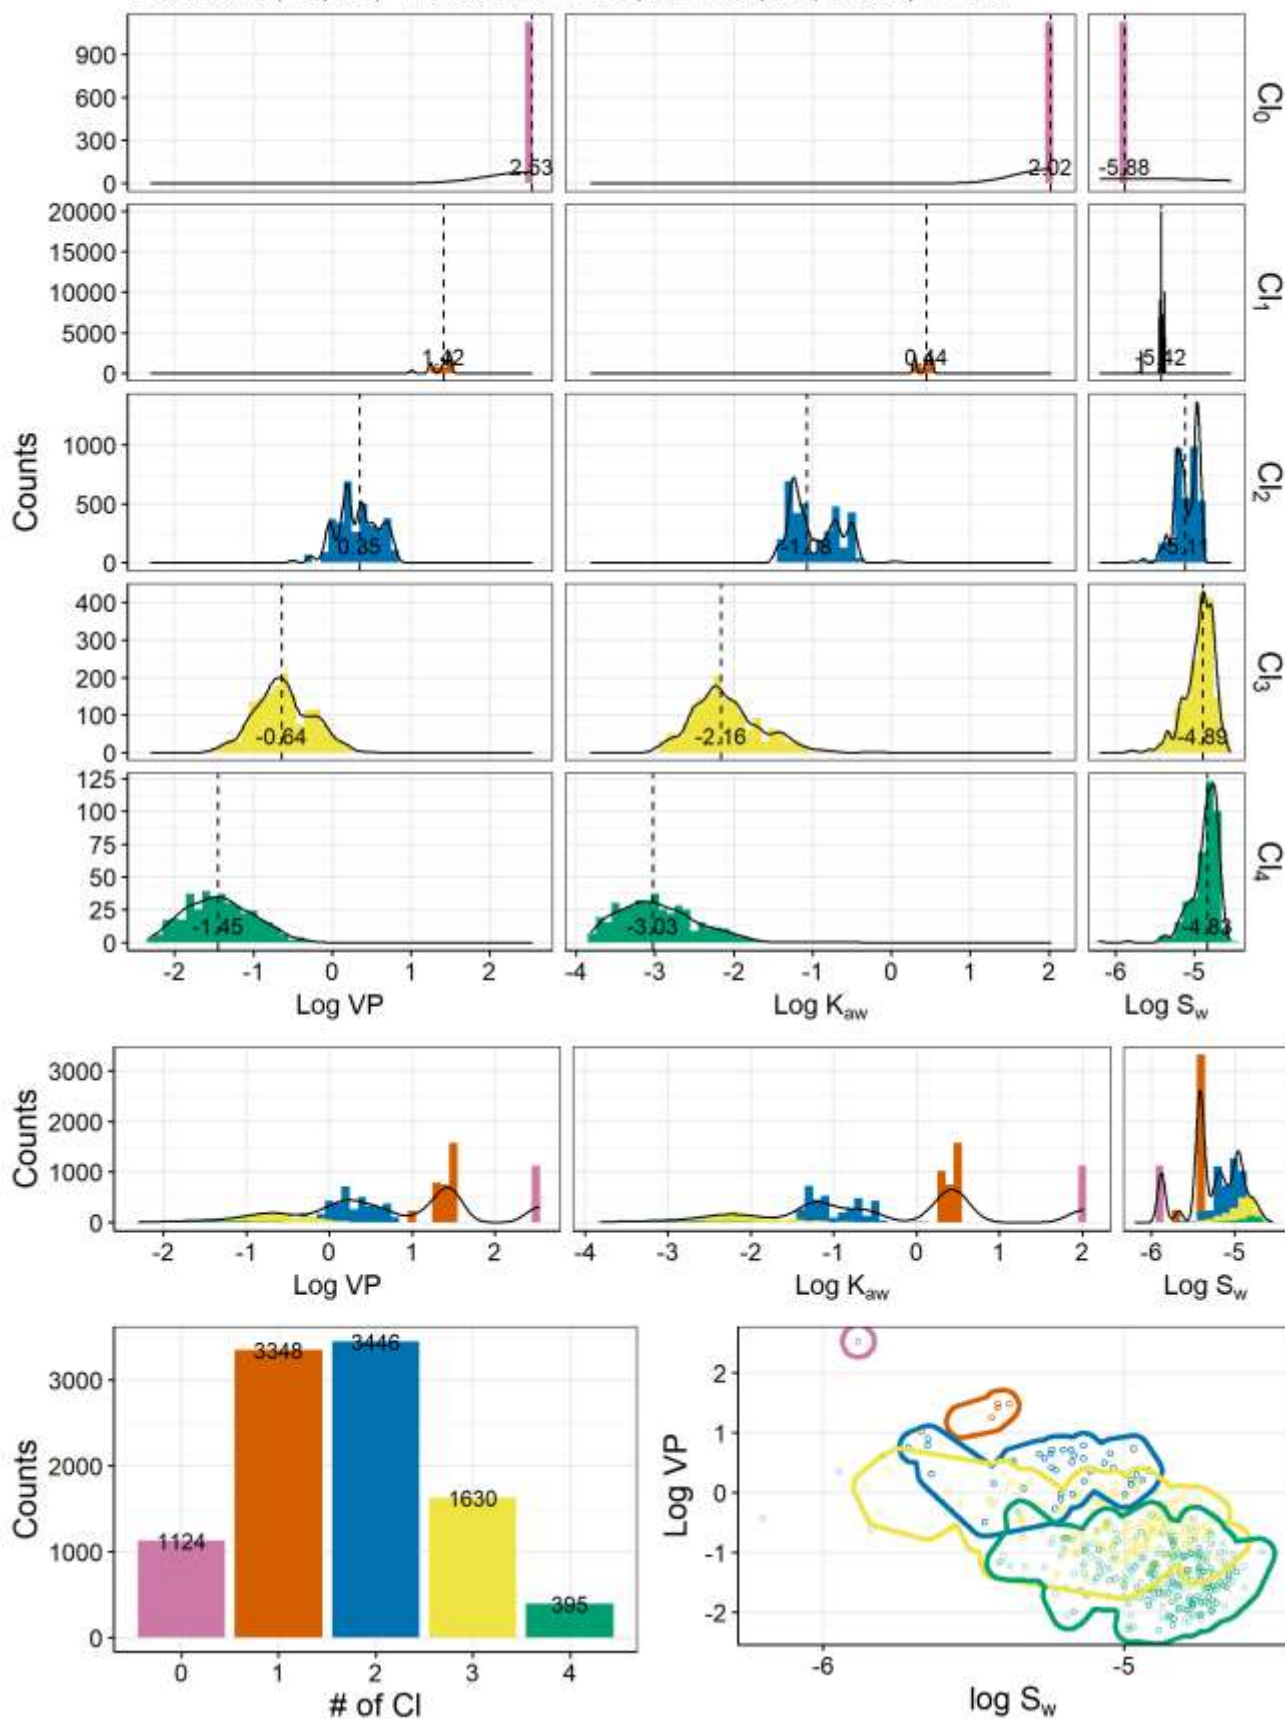



## C10, 40wt% CI

Total counts, 10,000; <100 counts omitted; bin width, 0.1; values, median

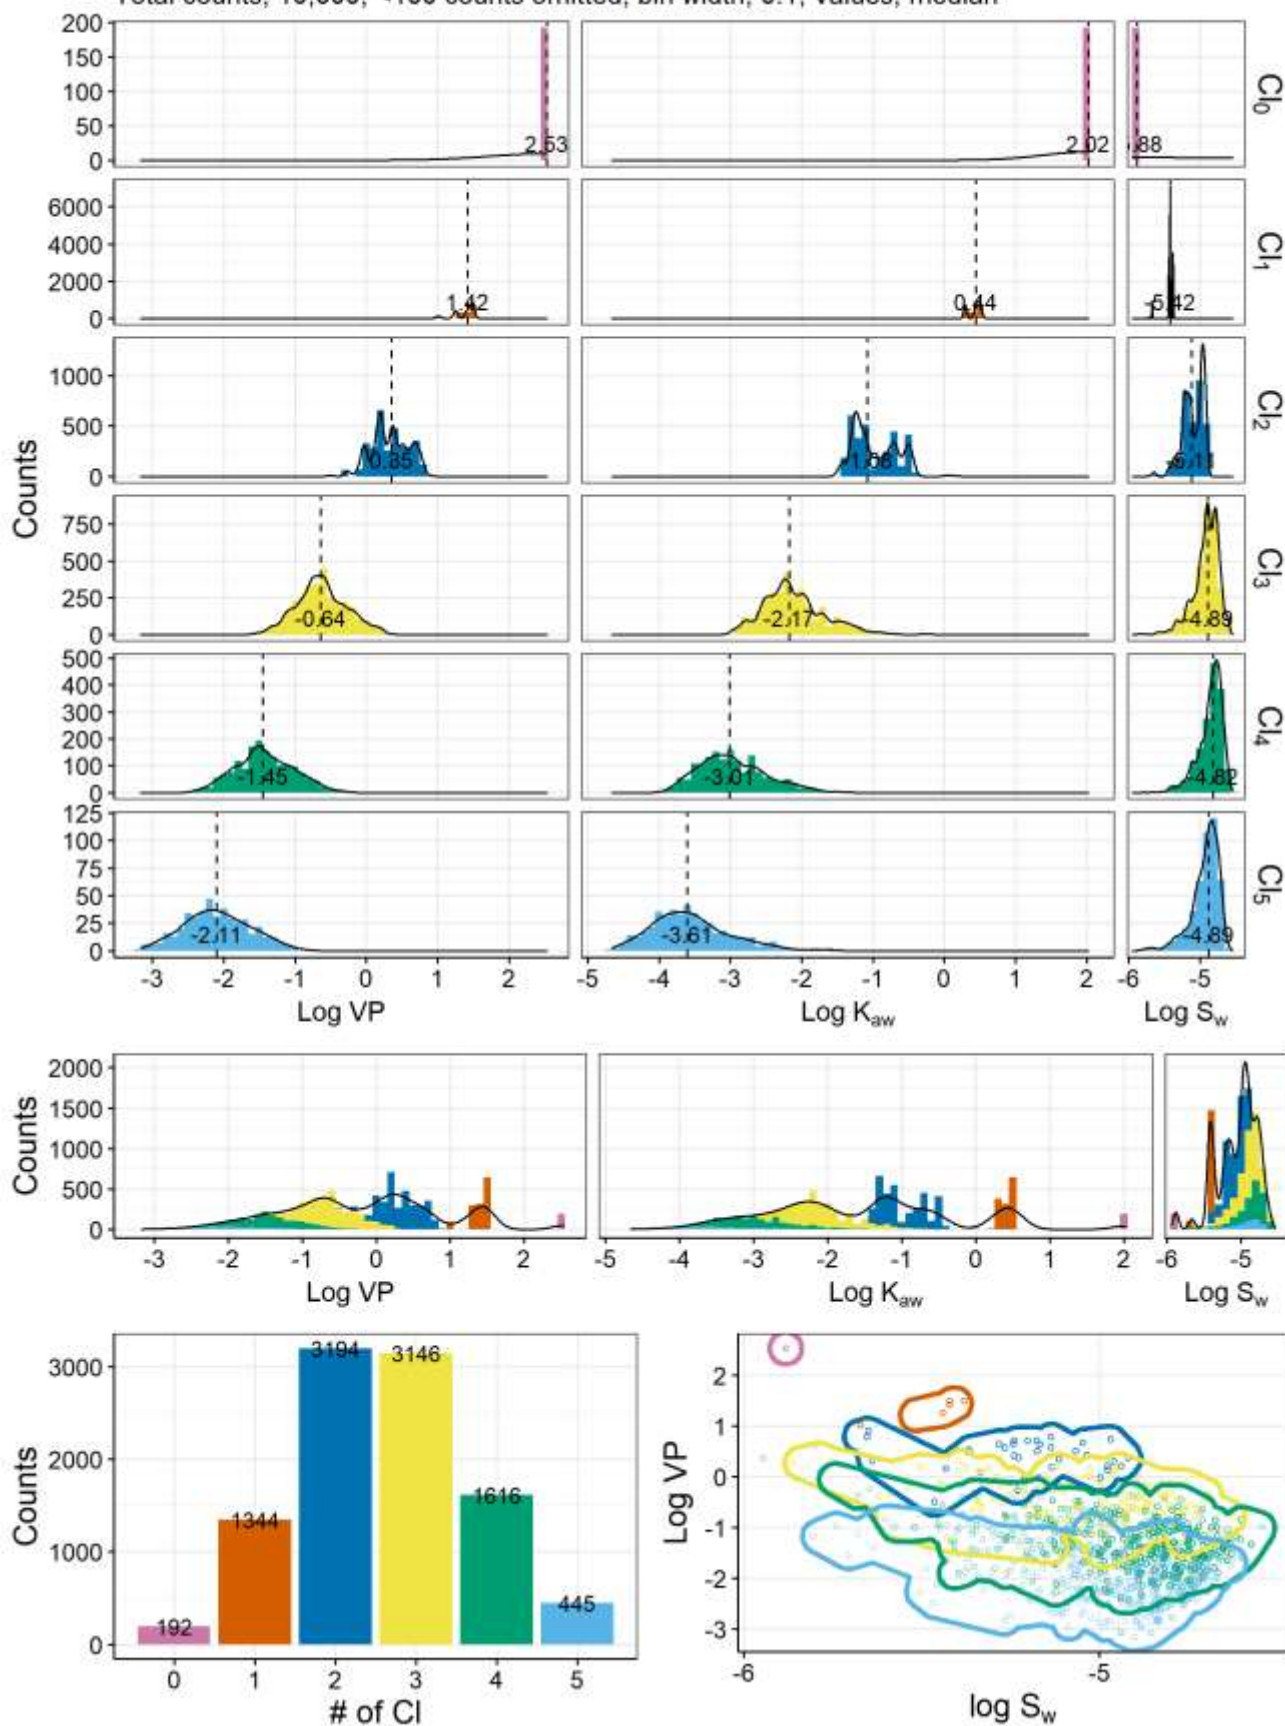

# C10, 50wt% CI

Total counts, 10,000; <100 counts omitted; bin width, 0.1; values, median

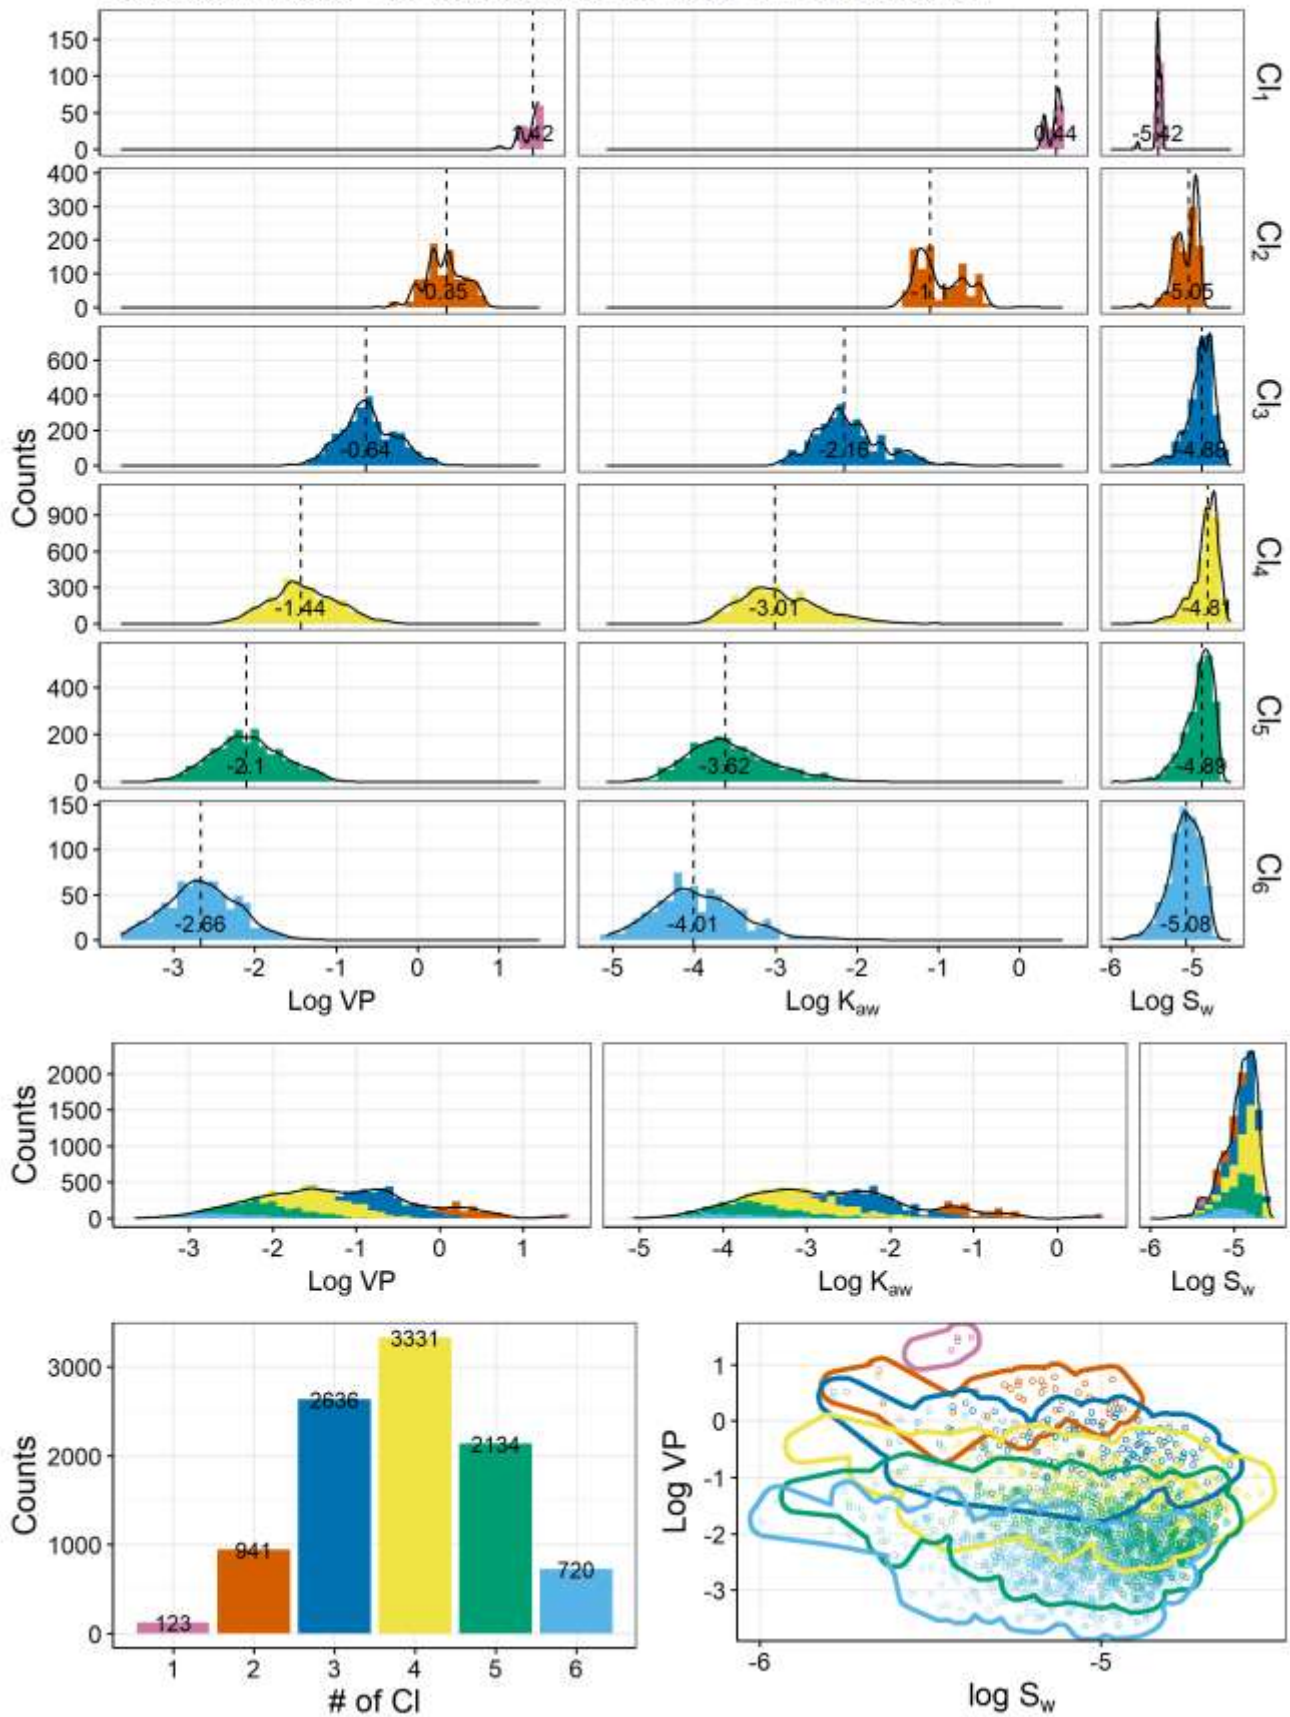

## C10, 60wt% CI

Total counts, 10,000; <100 counts omitted; bin width, 0.1; values, median

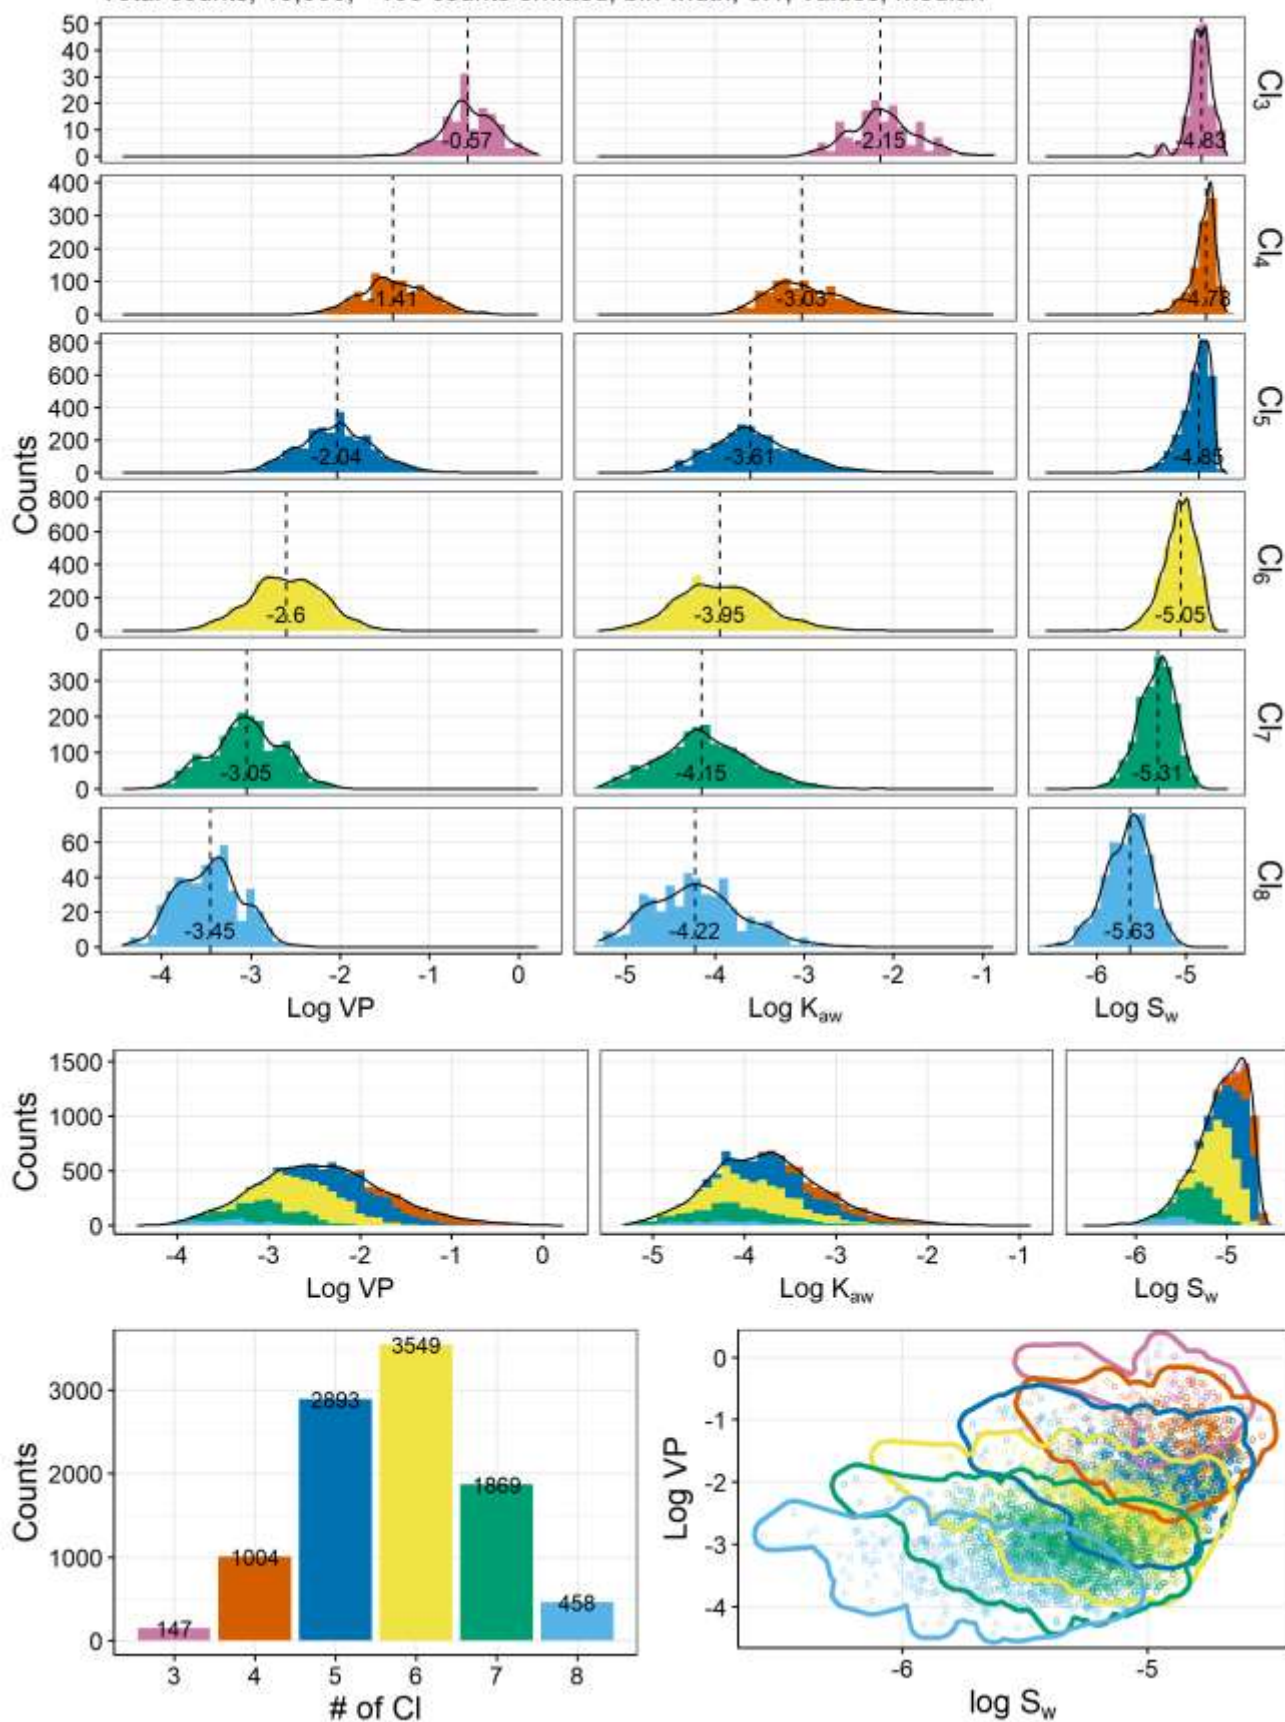



## C10, 70wt% CI

Total counts, 10,000; <100 counts omitted; bin width, 0.1; values, median

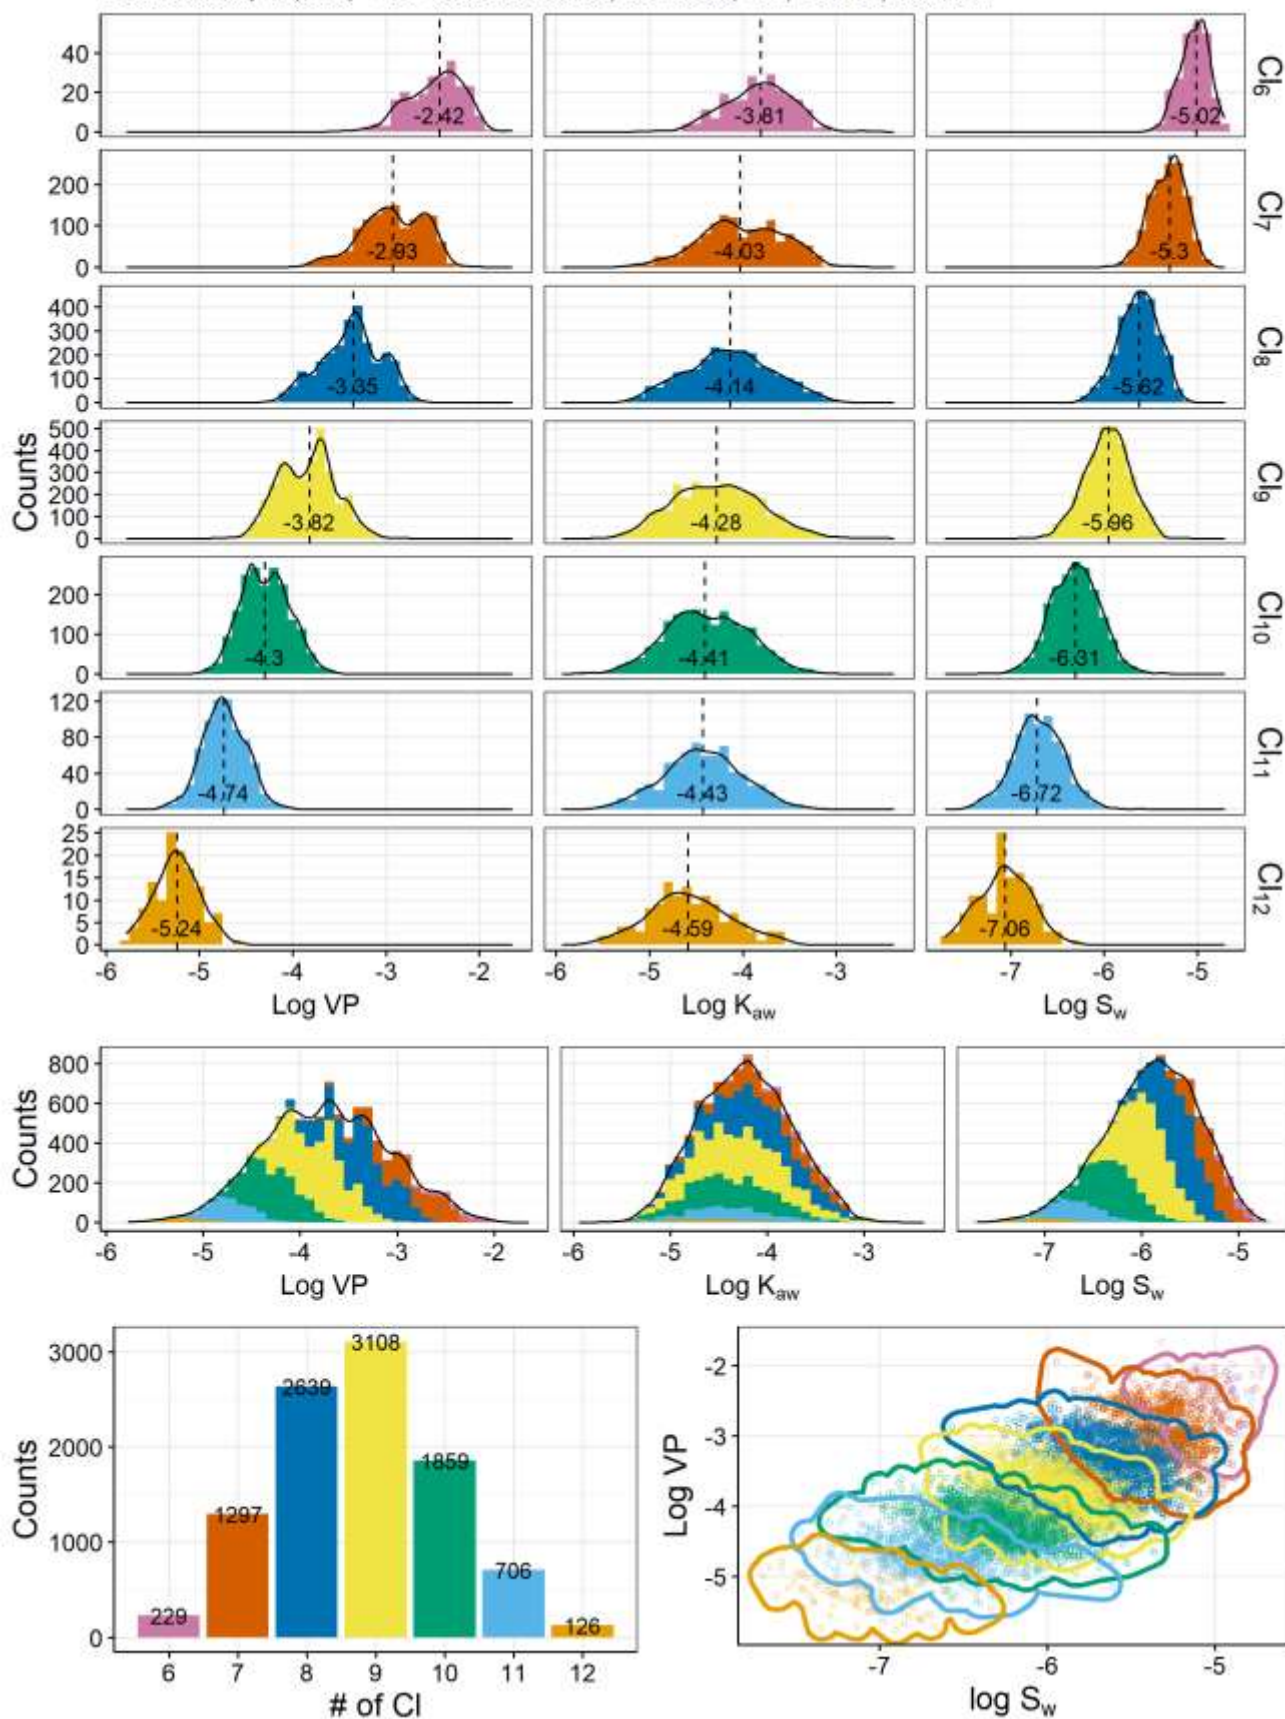

## C11, 30wt% CI

Total counts, 10,000; <100 counts omitted; bin width, 0.1; values, median

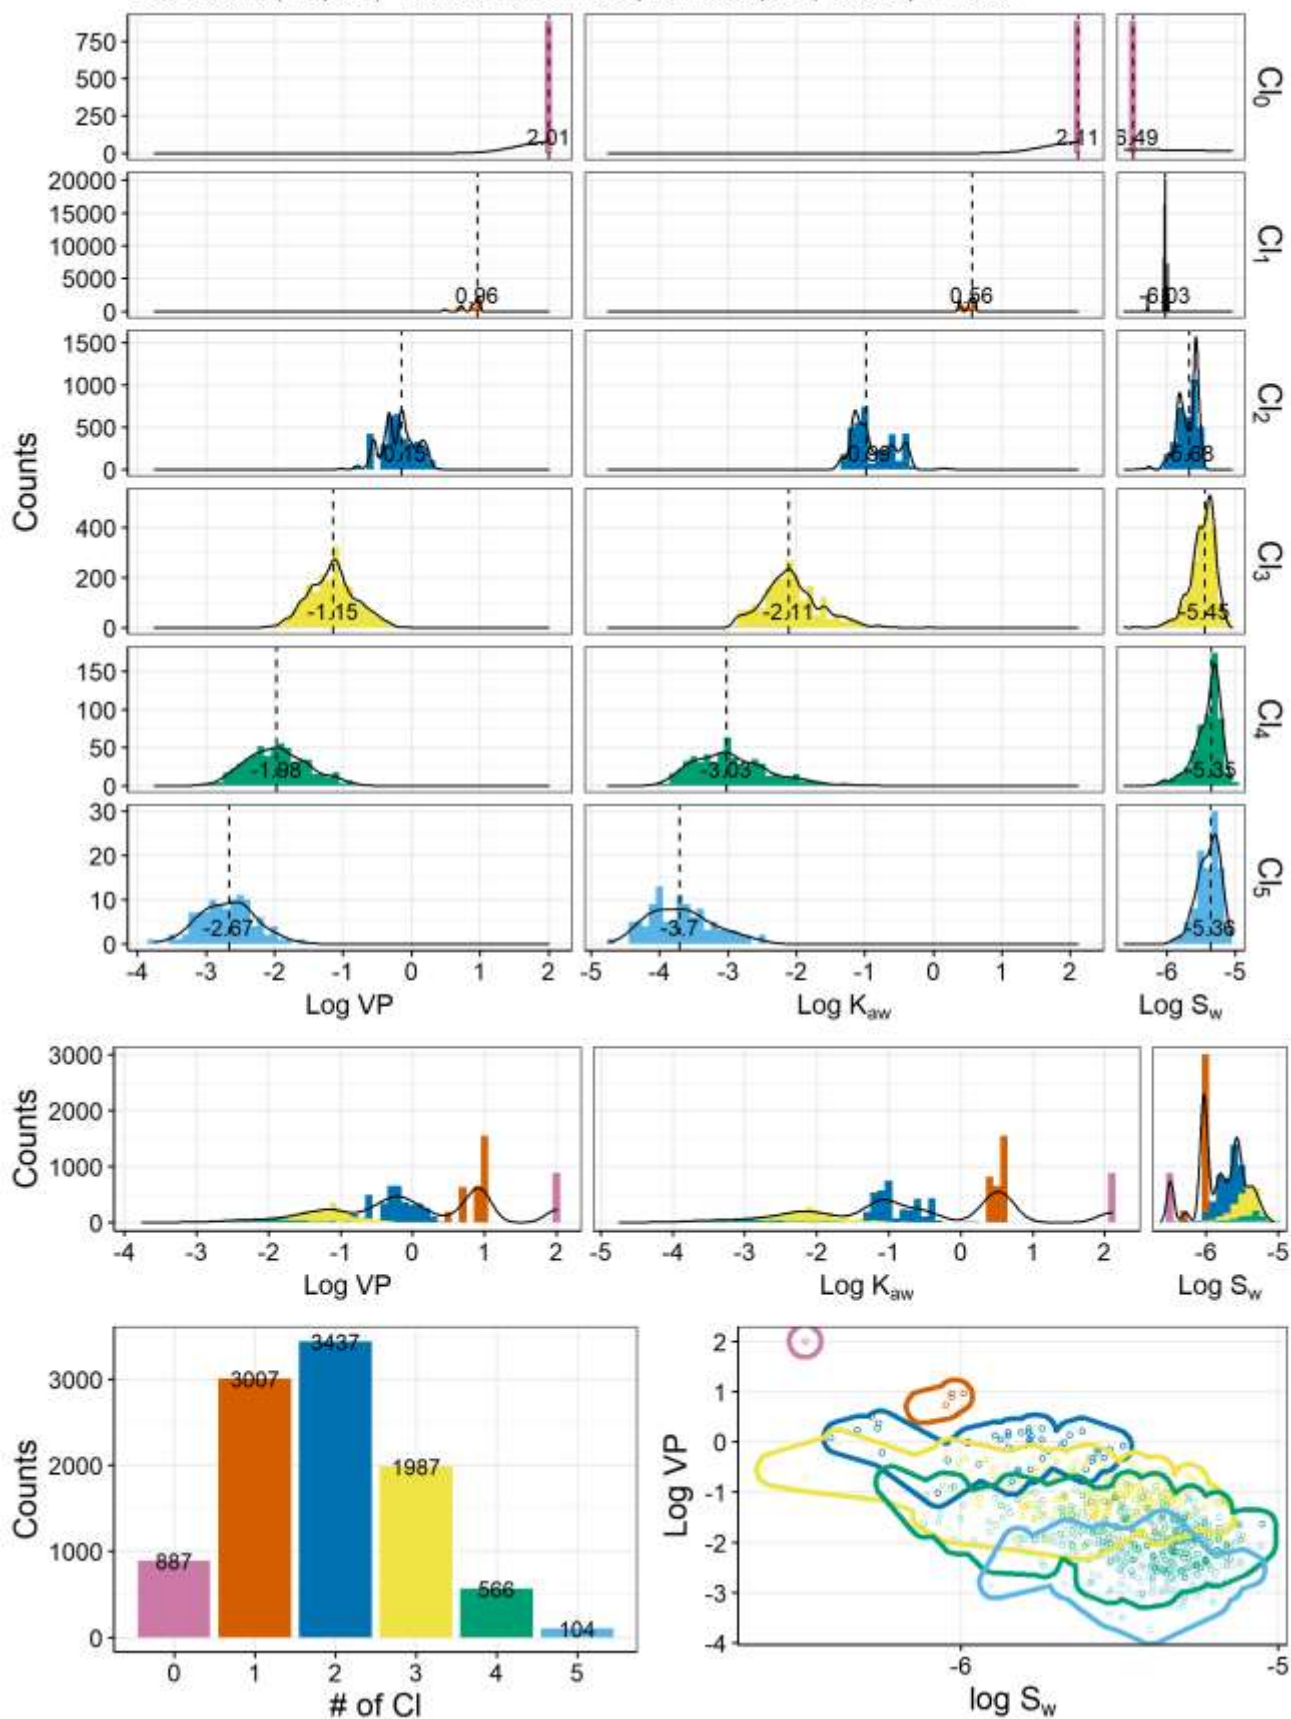

# C11, 40wt% CI

Total counts, 10,000; <100 counts omitted; bin width, 0.1; values, median

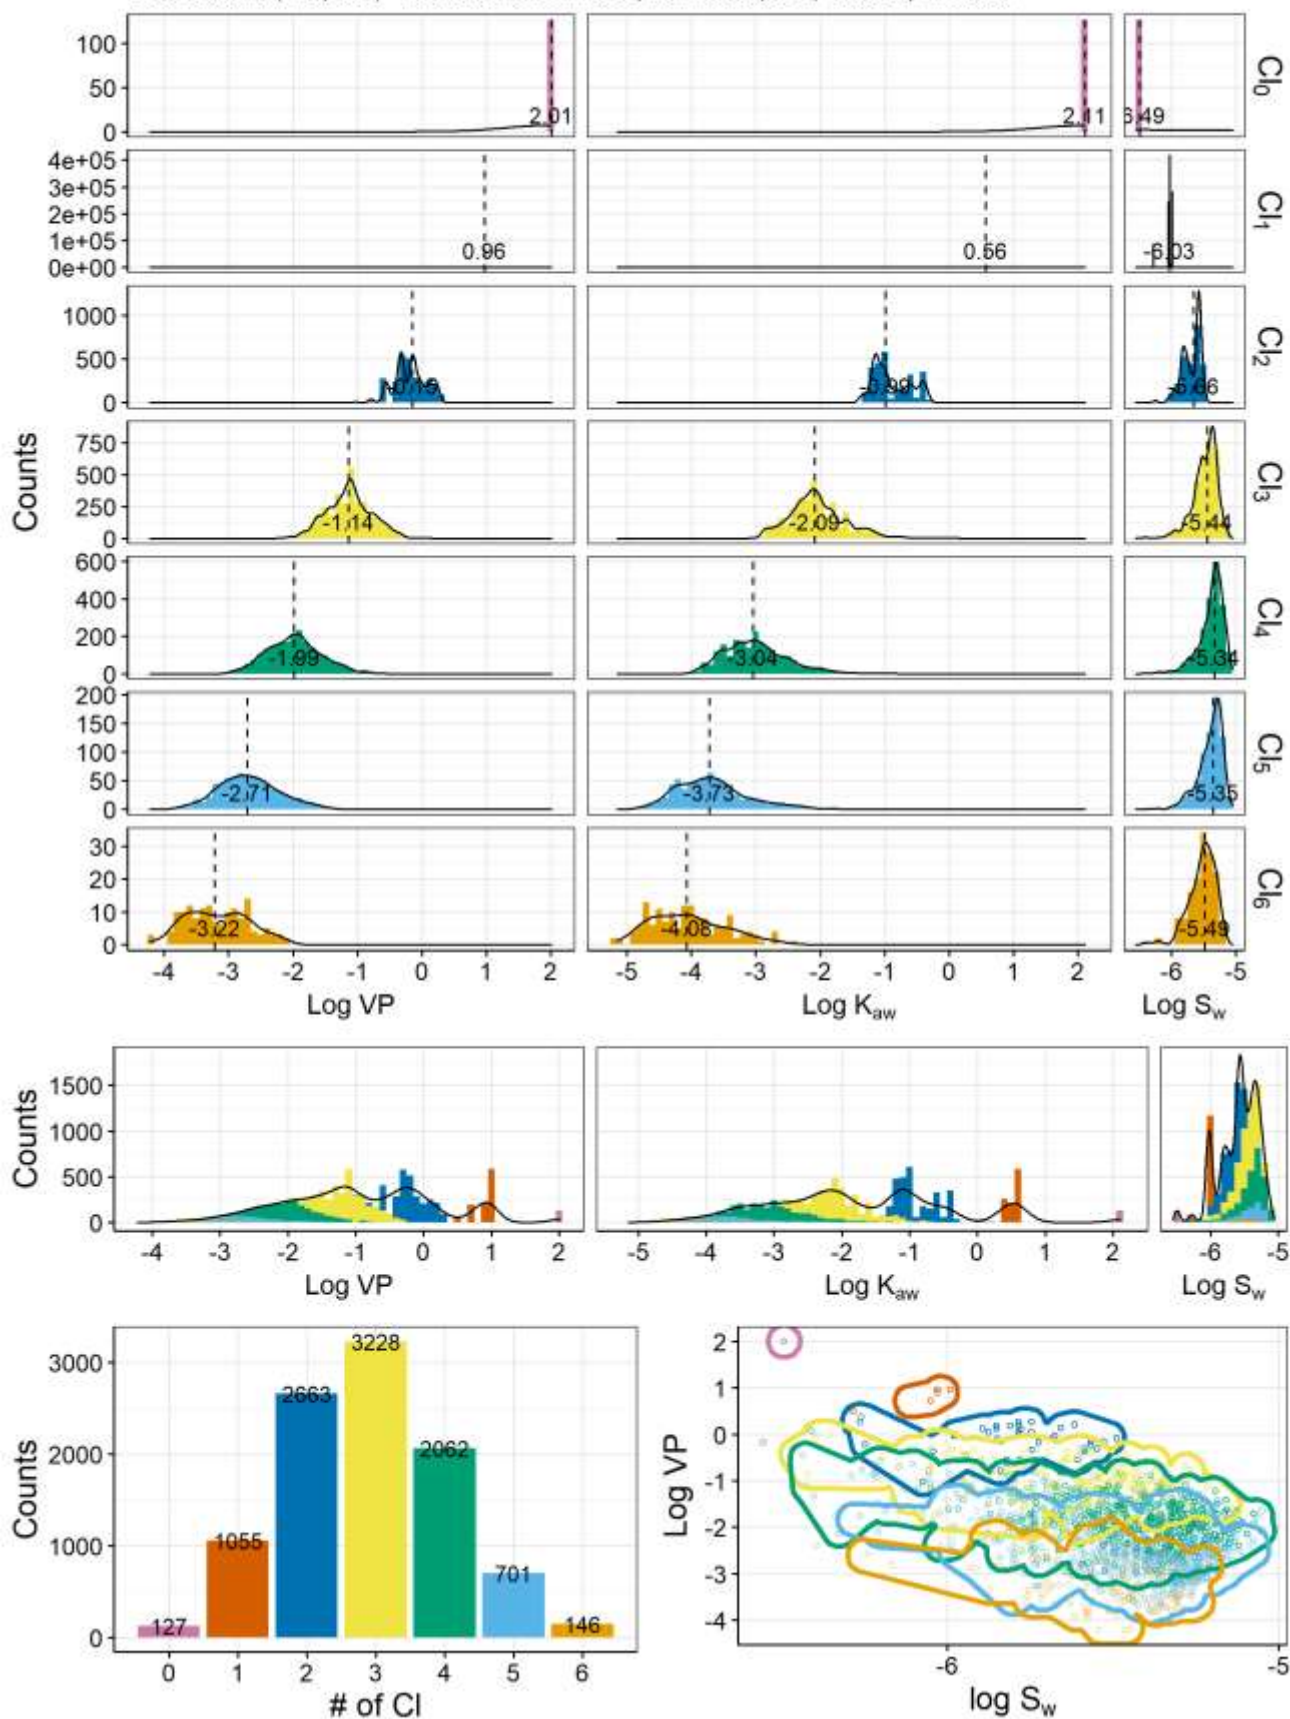



## C11, 50wt% CI

Total counts, 10,000; <100 counts omitted; bin width, 0.1; values, median

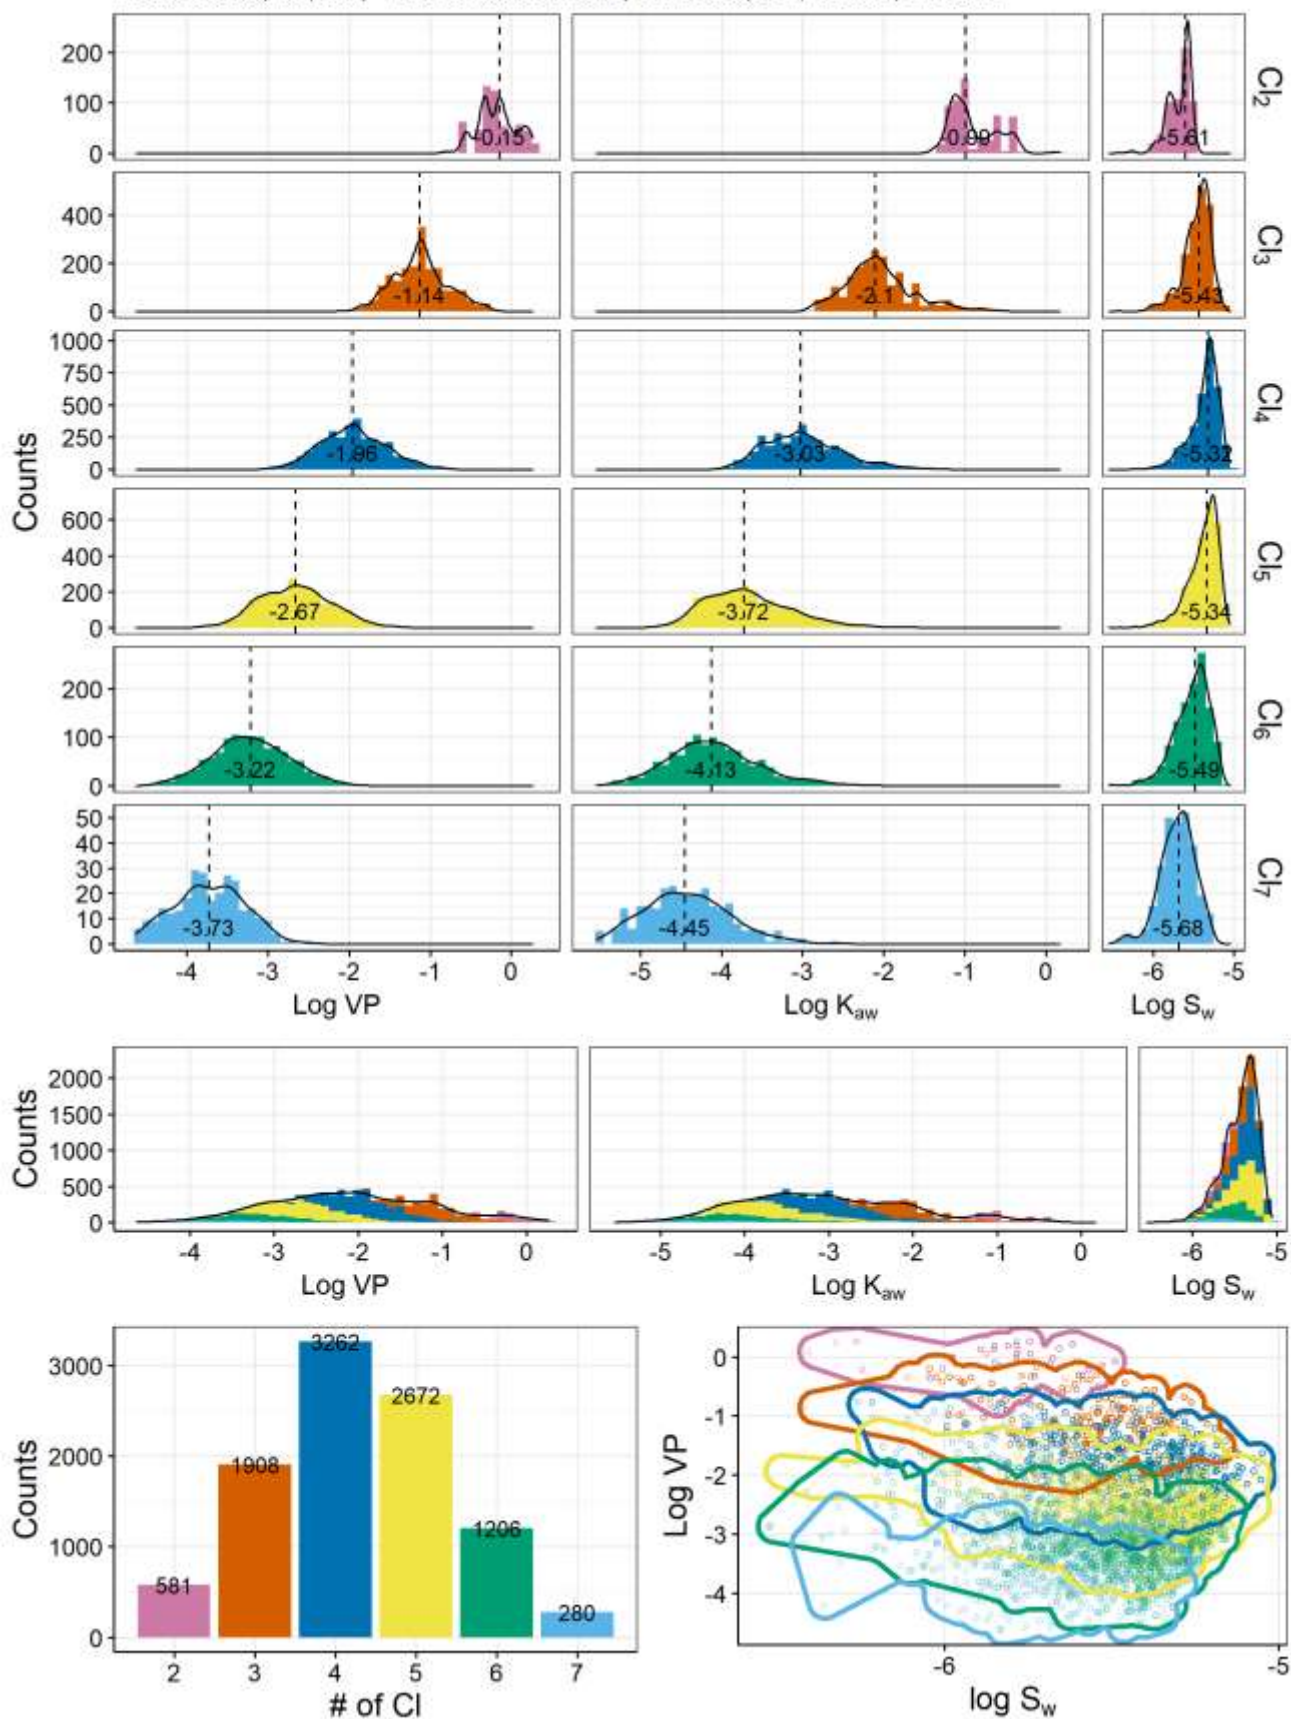

# C11, 60wt% CI

Total counts, 10,000; <100 counts omitted; bin width, 0.1; values, median

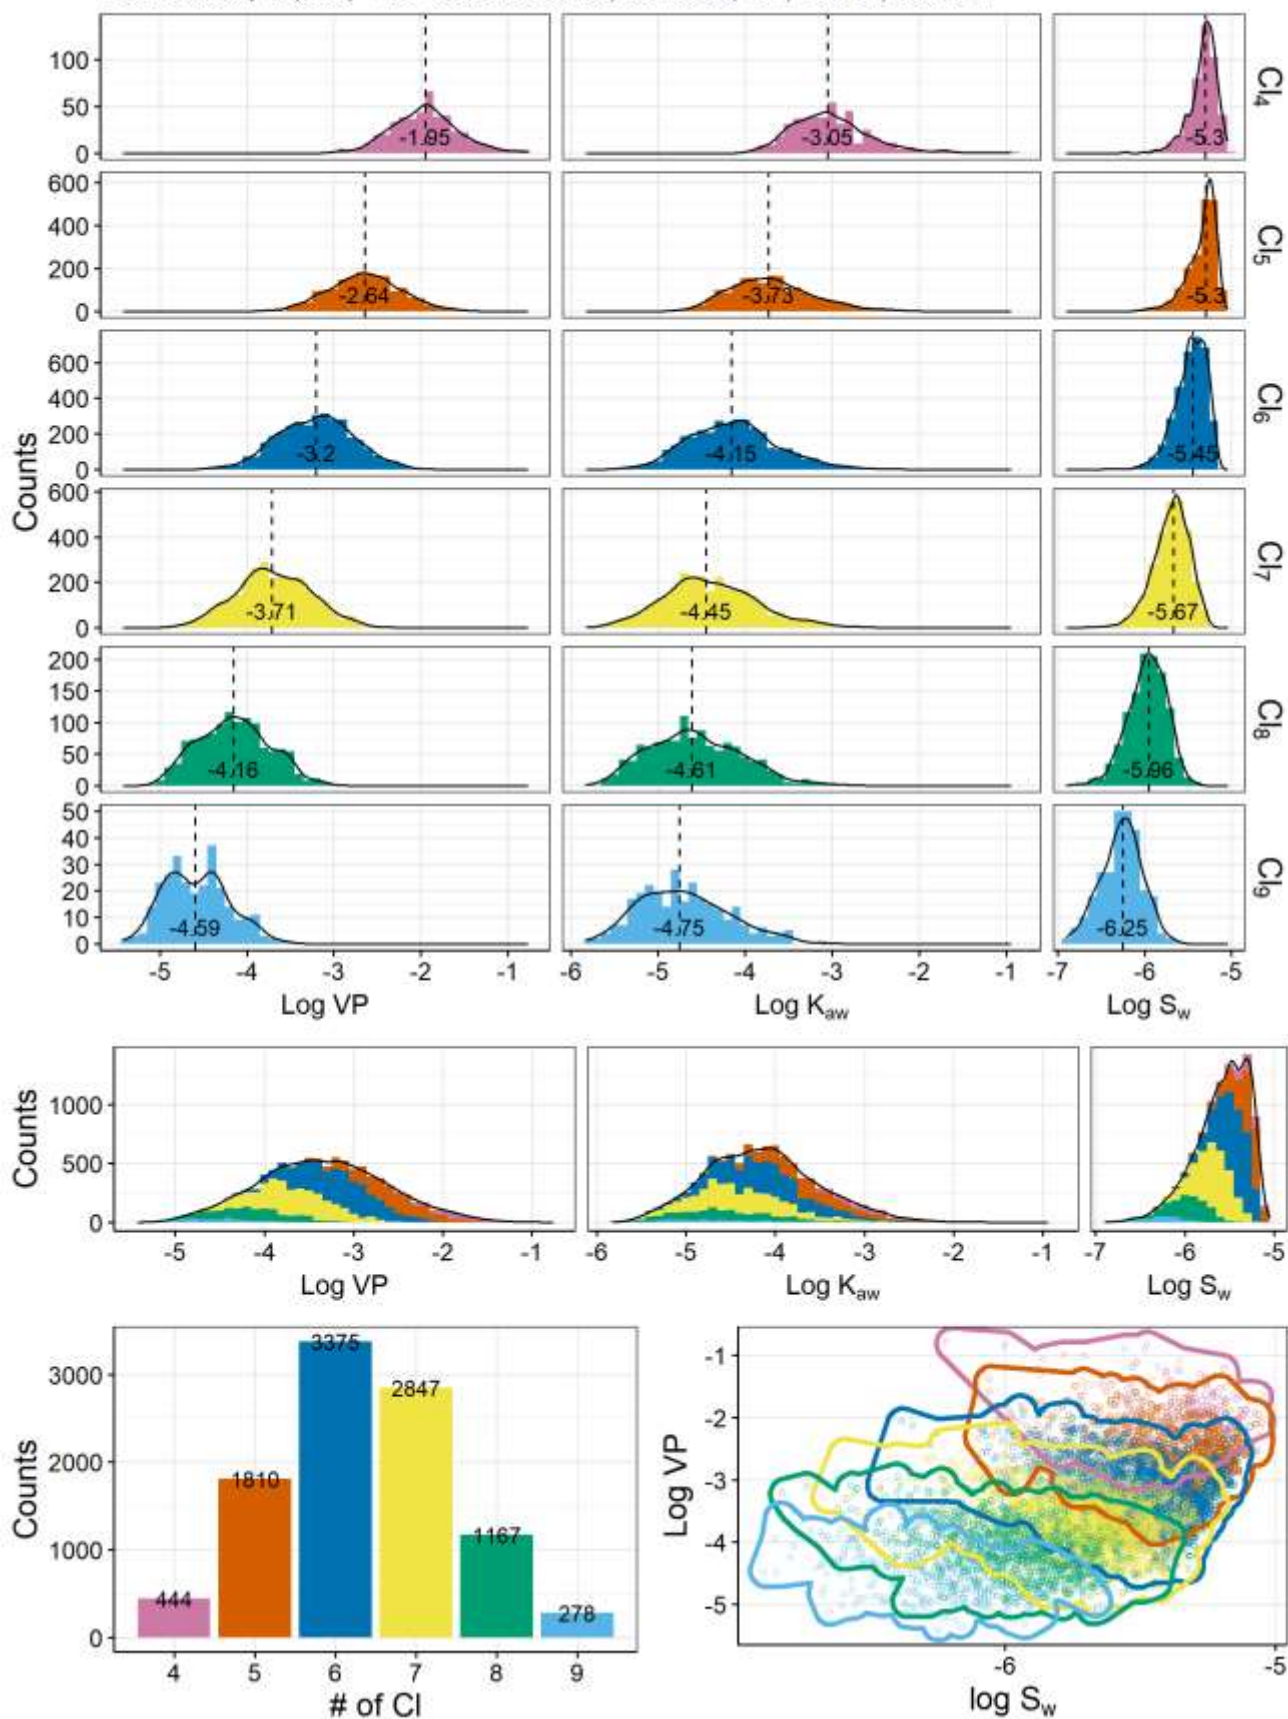

## C11, 70wt% CI

Total counts, 10,000; <100 counts omitted; bin width, 0.1; values, median

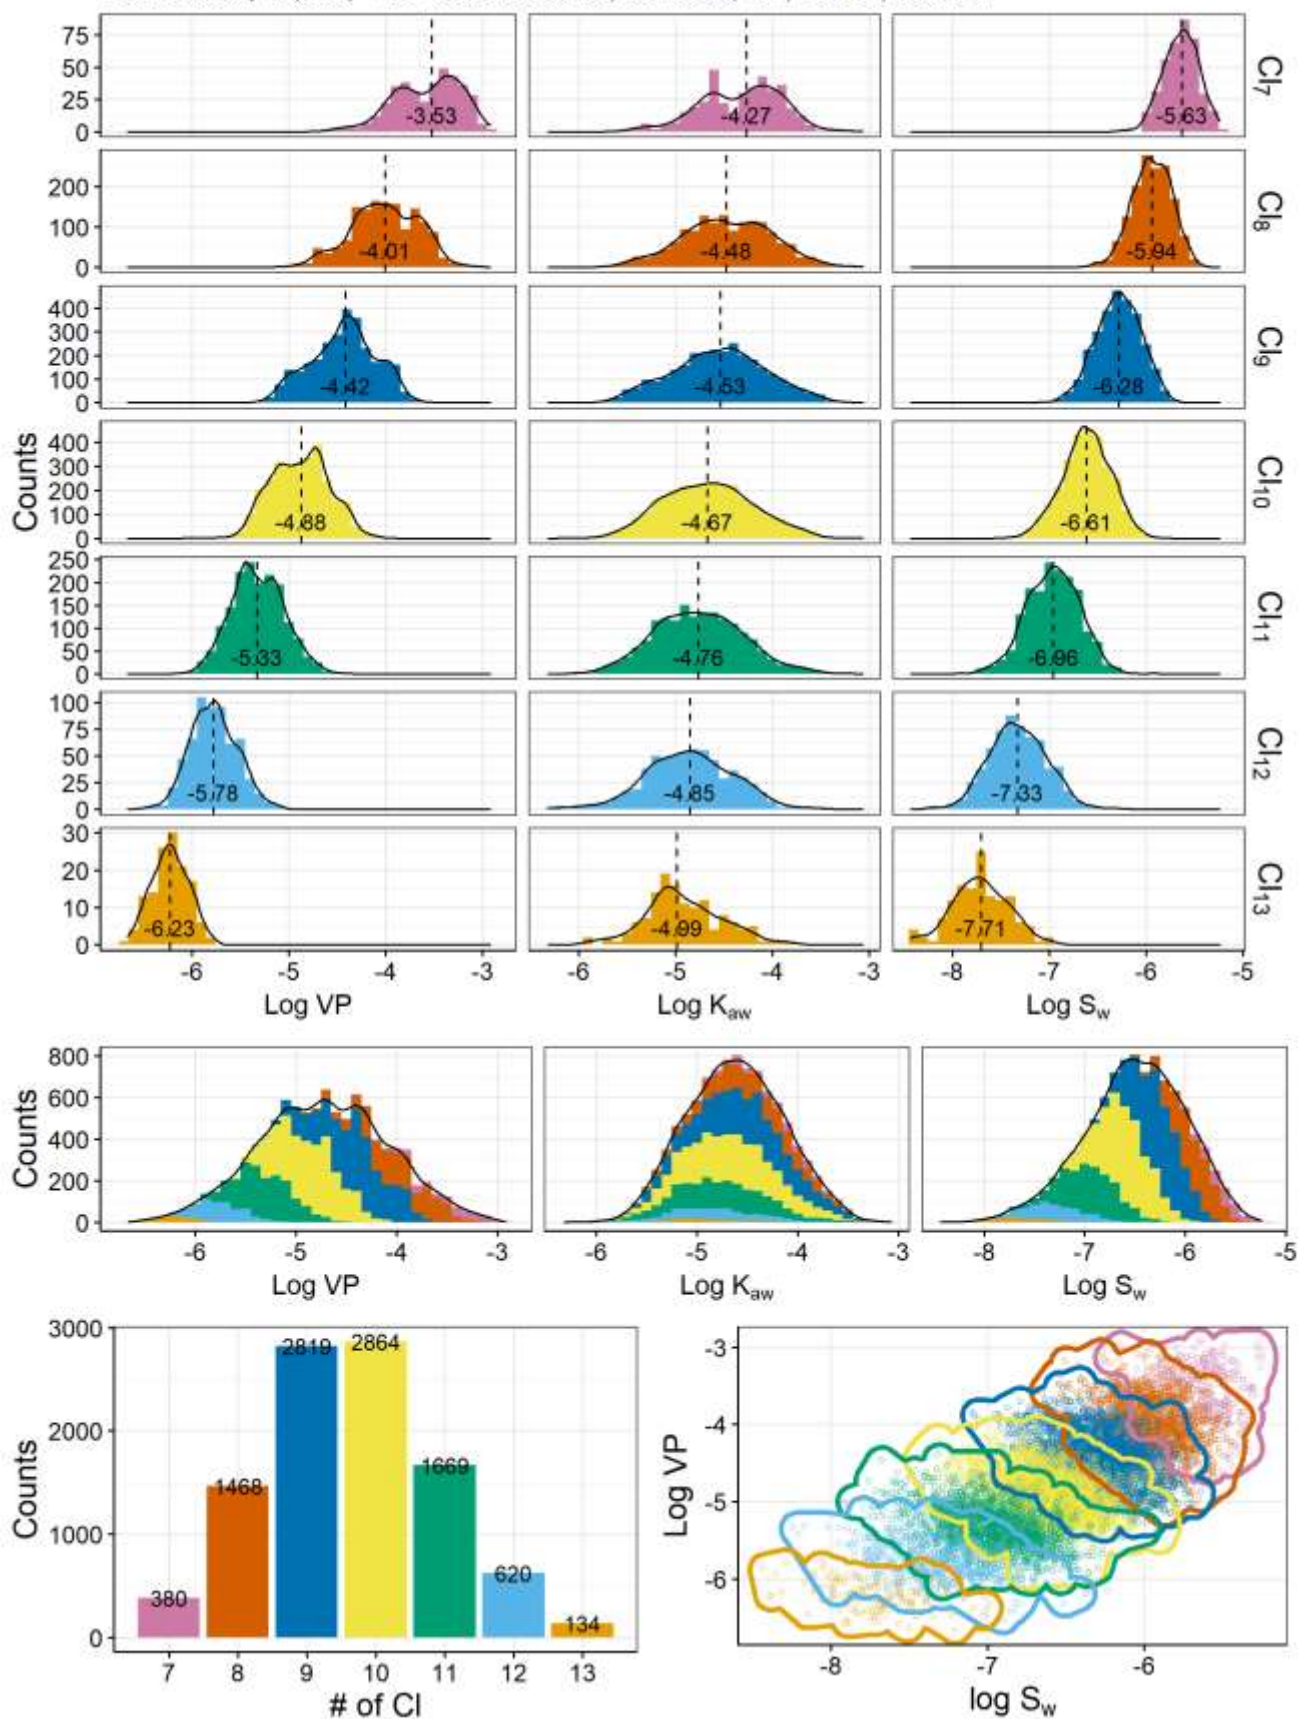



# C12, 30wt% CI

Total counts, 10,000; <100 counts omitted; bin width, 0.1; values, median

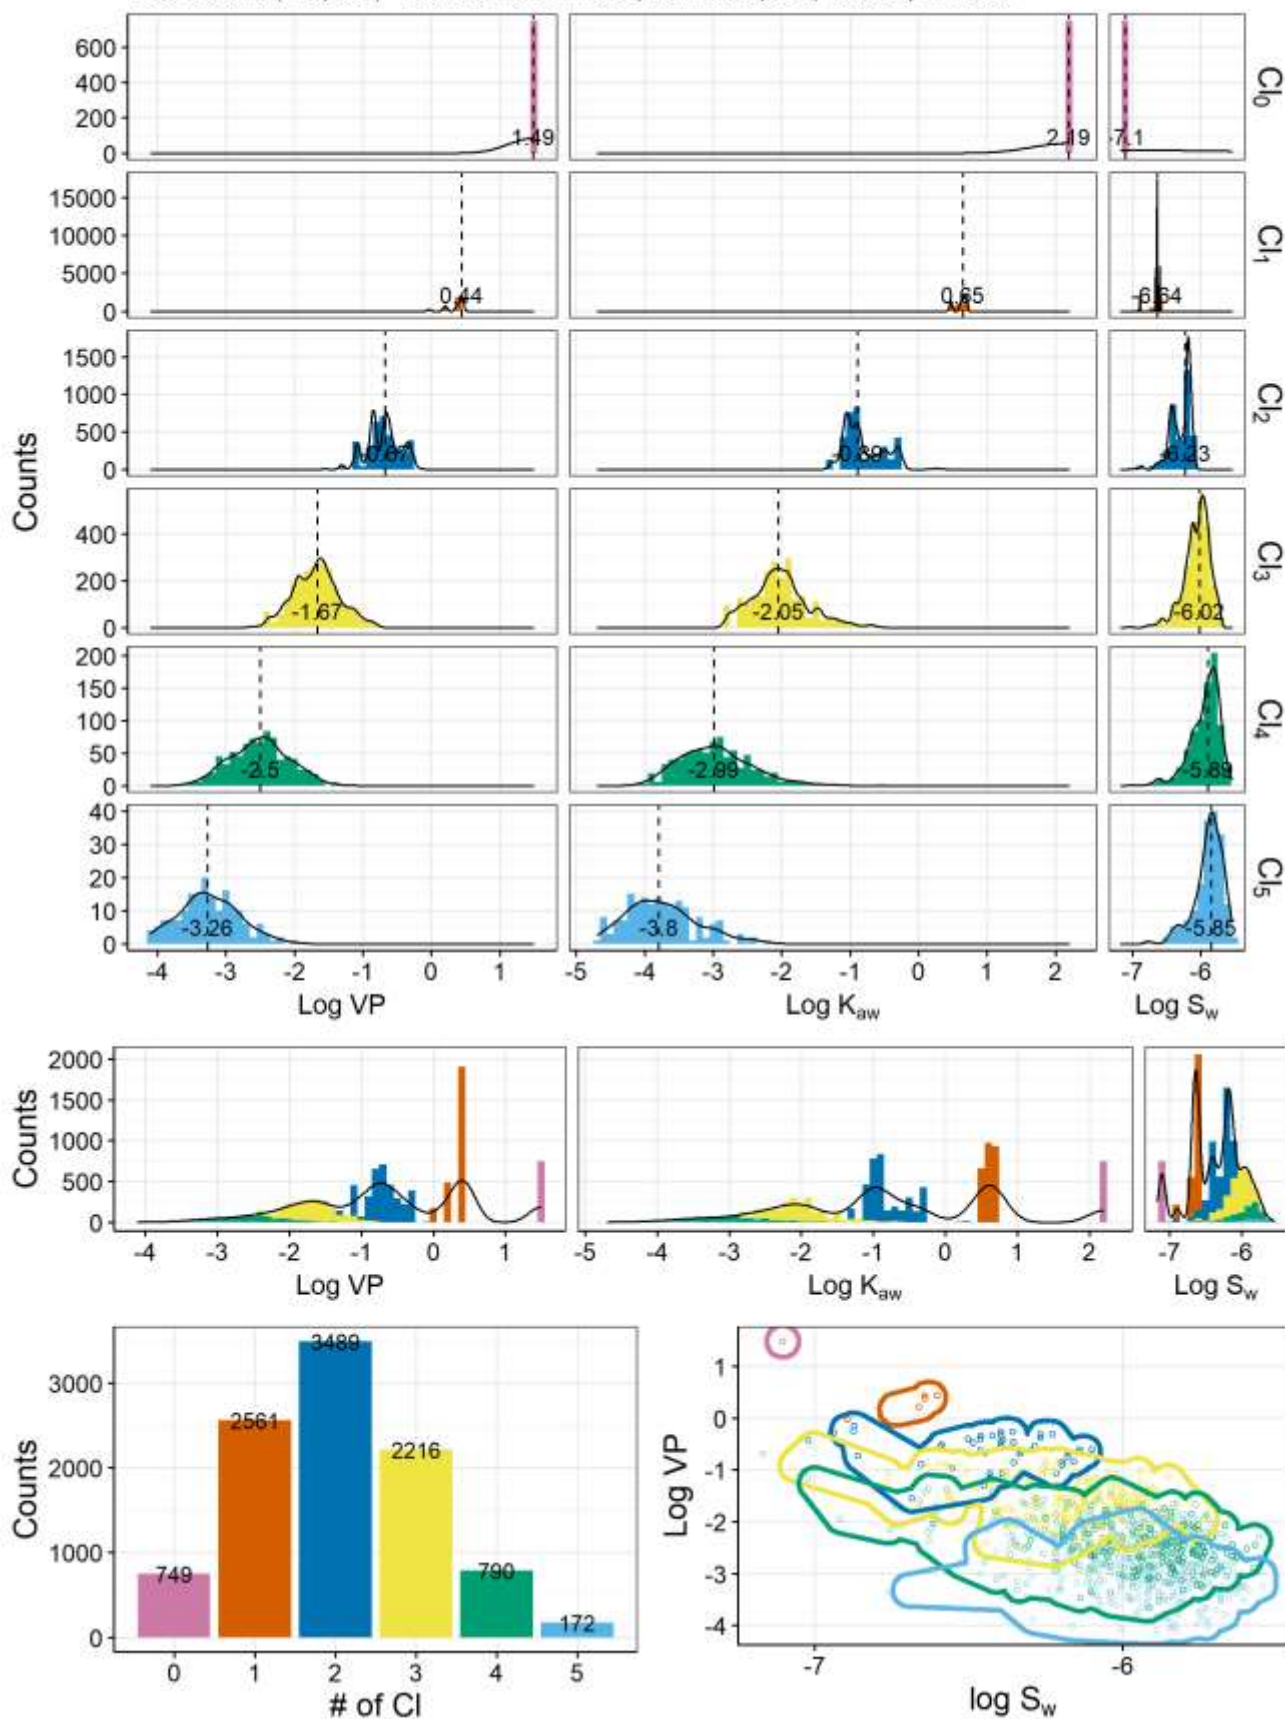

## C12, 40wt% CI

Total counts, 10,000; <100 counts omitted; bin width, 0.1; values, median

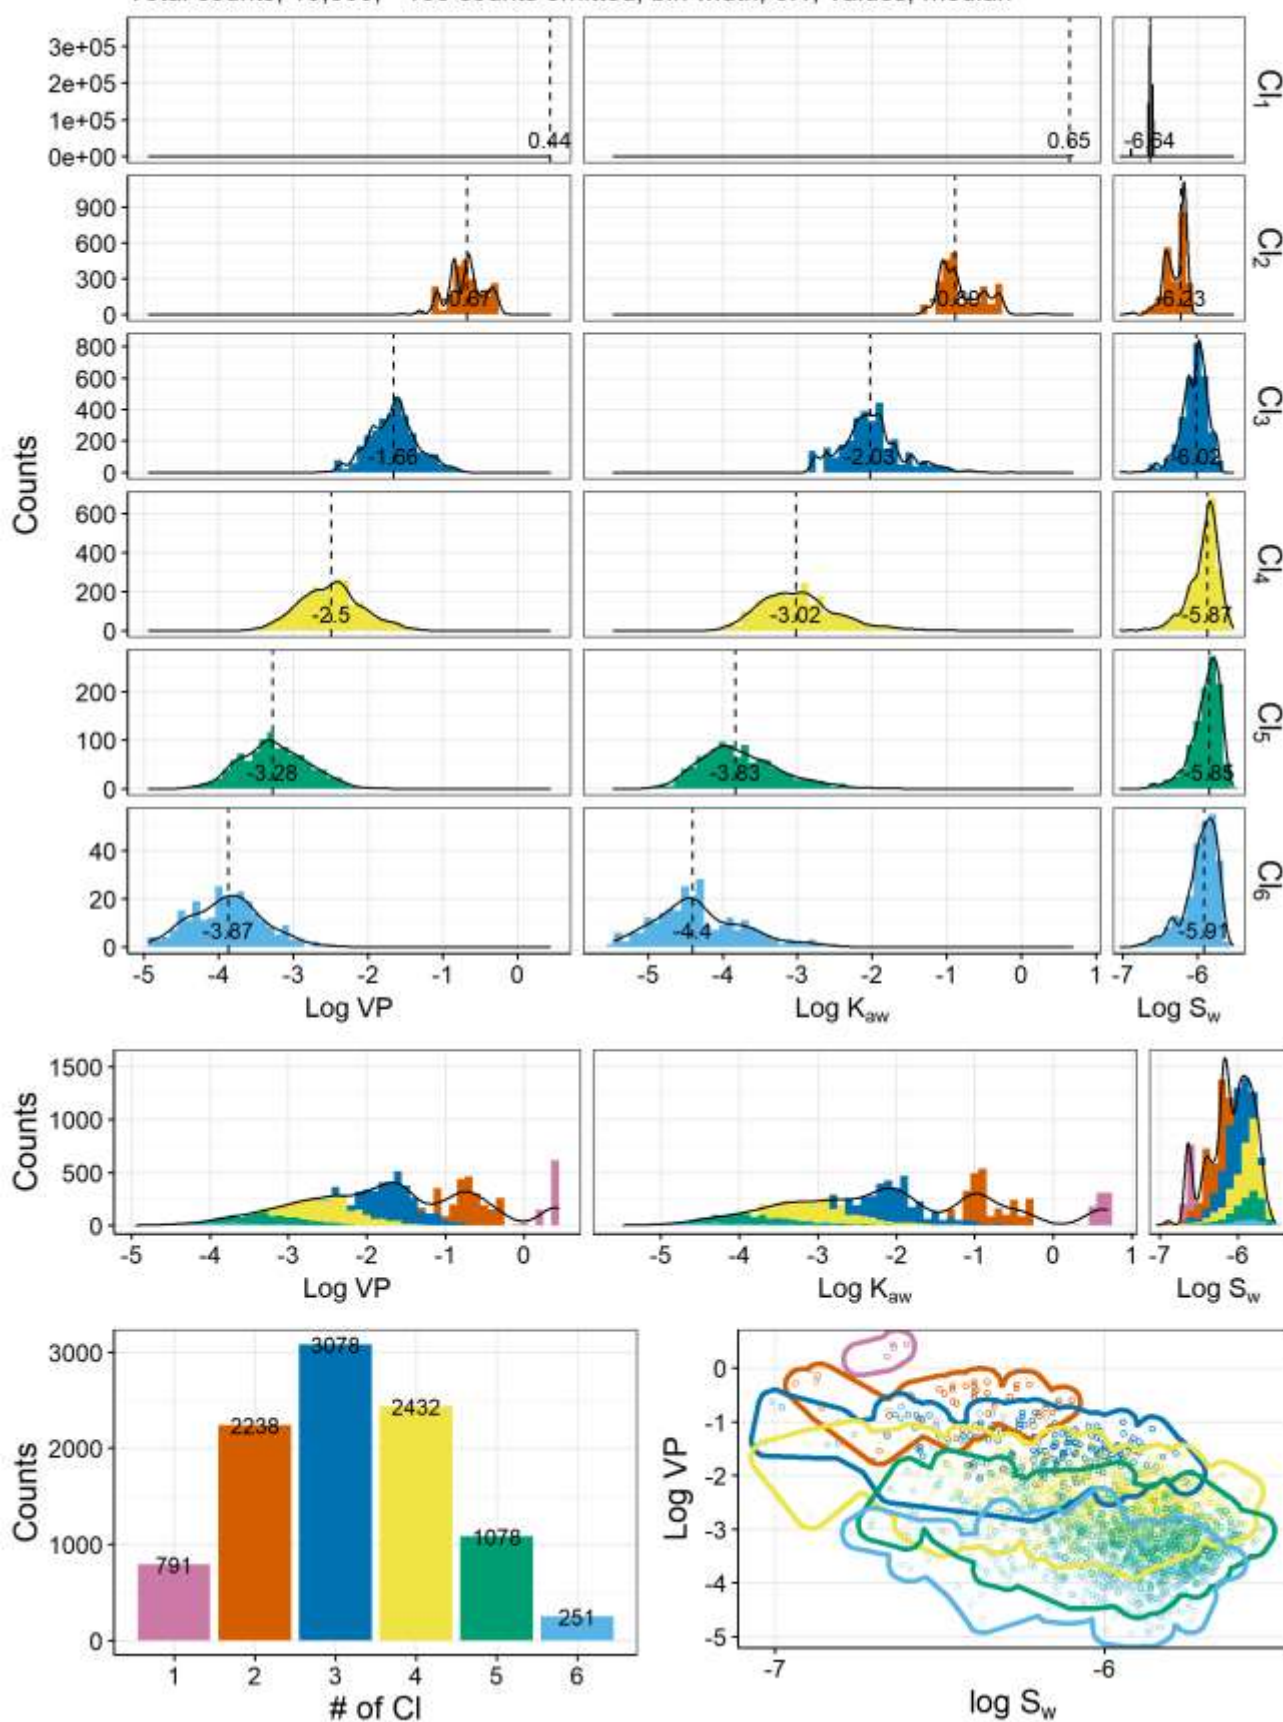

## C12, 50wt% CI

Total counts, 10,000; <100 counts omitted; bin width, 0.1; values, median

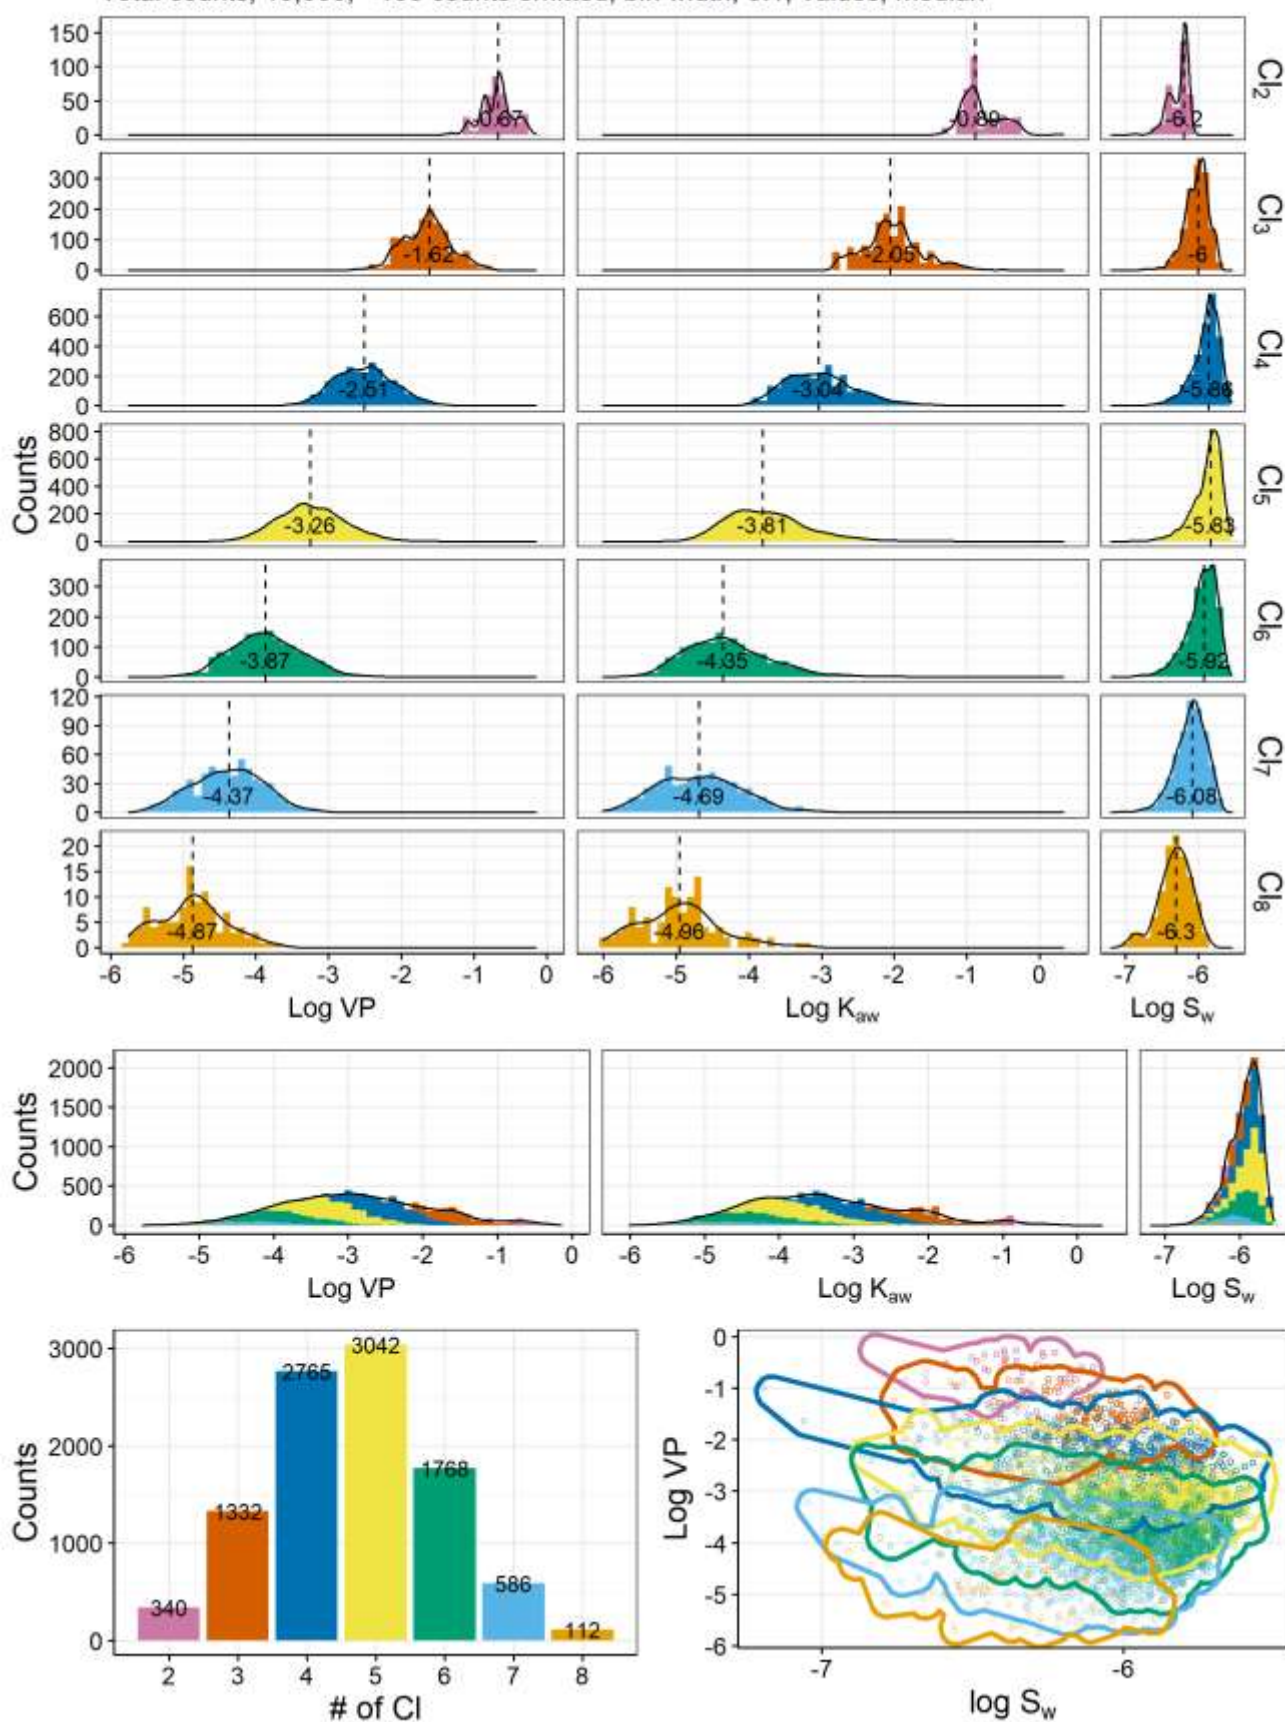



## C12, 60wt% CI

Total counts, 10,000; <100 counts omitted; bin width, 0.1; values, median

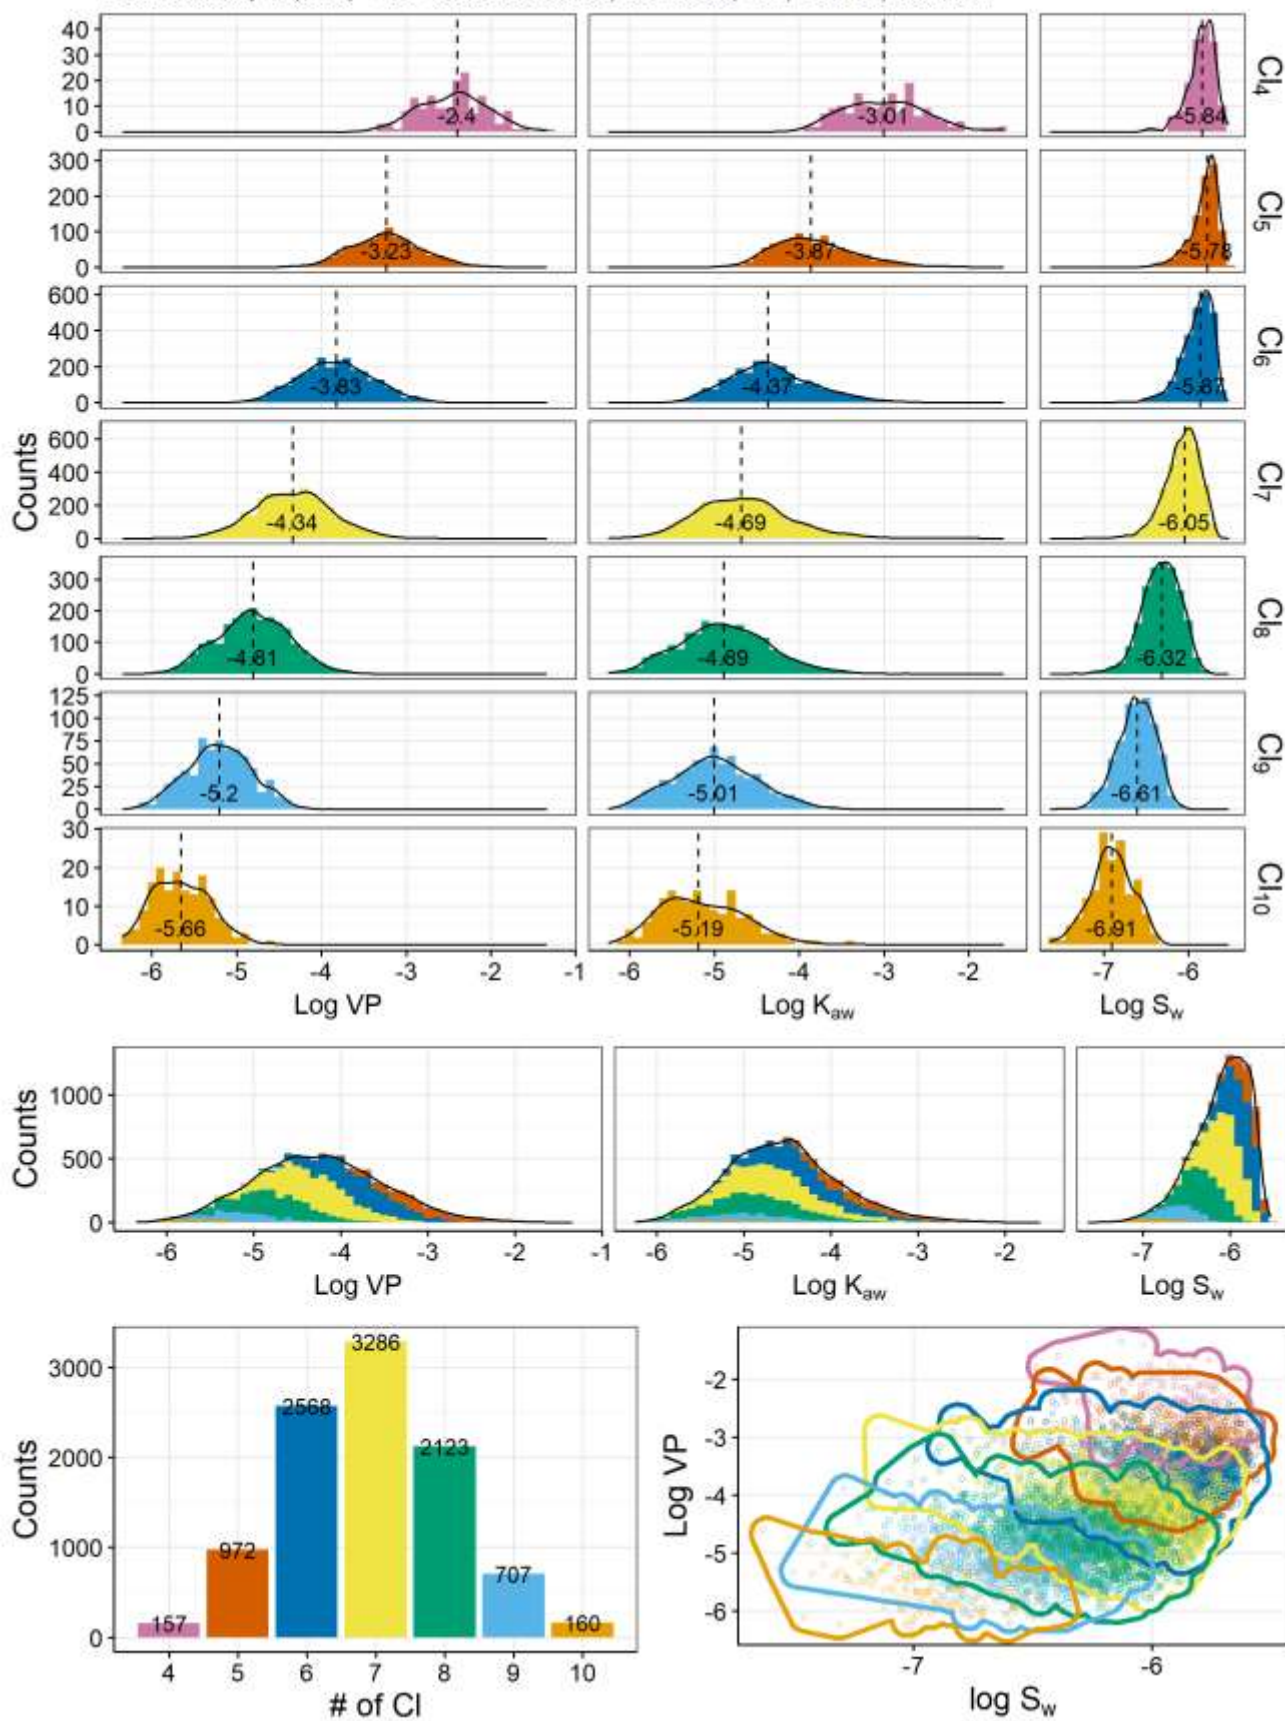

## C12, 70wt% CI

Total counts, 10,000; <100 counts omitted; bin width, 0.1; values, median

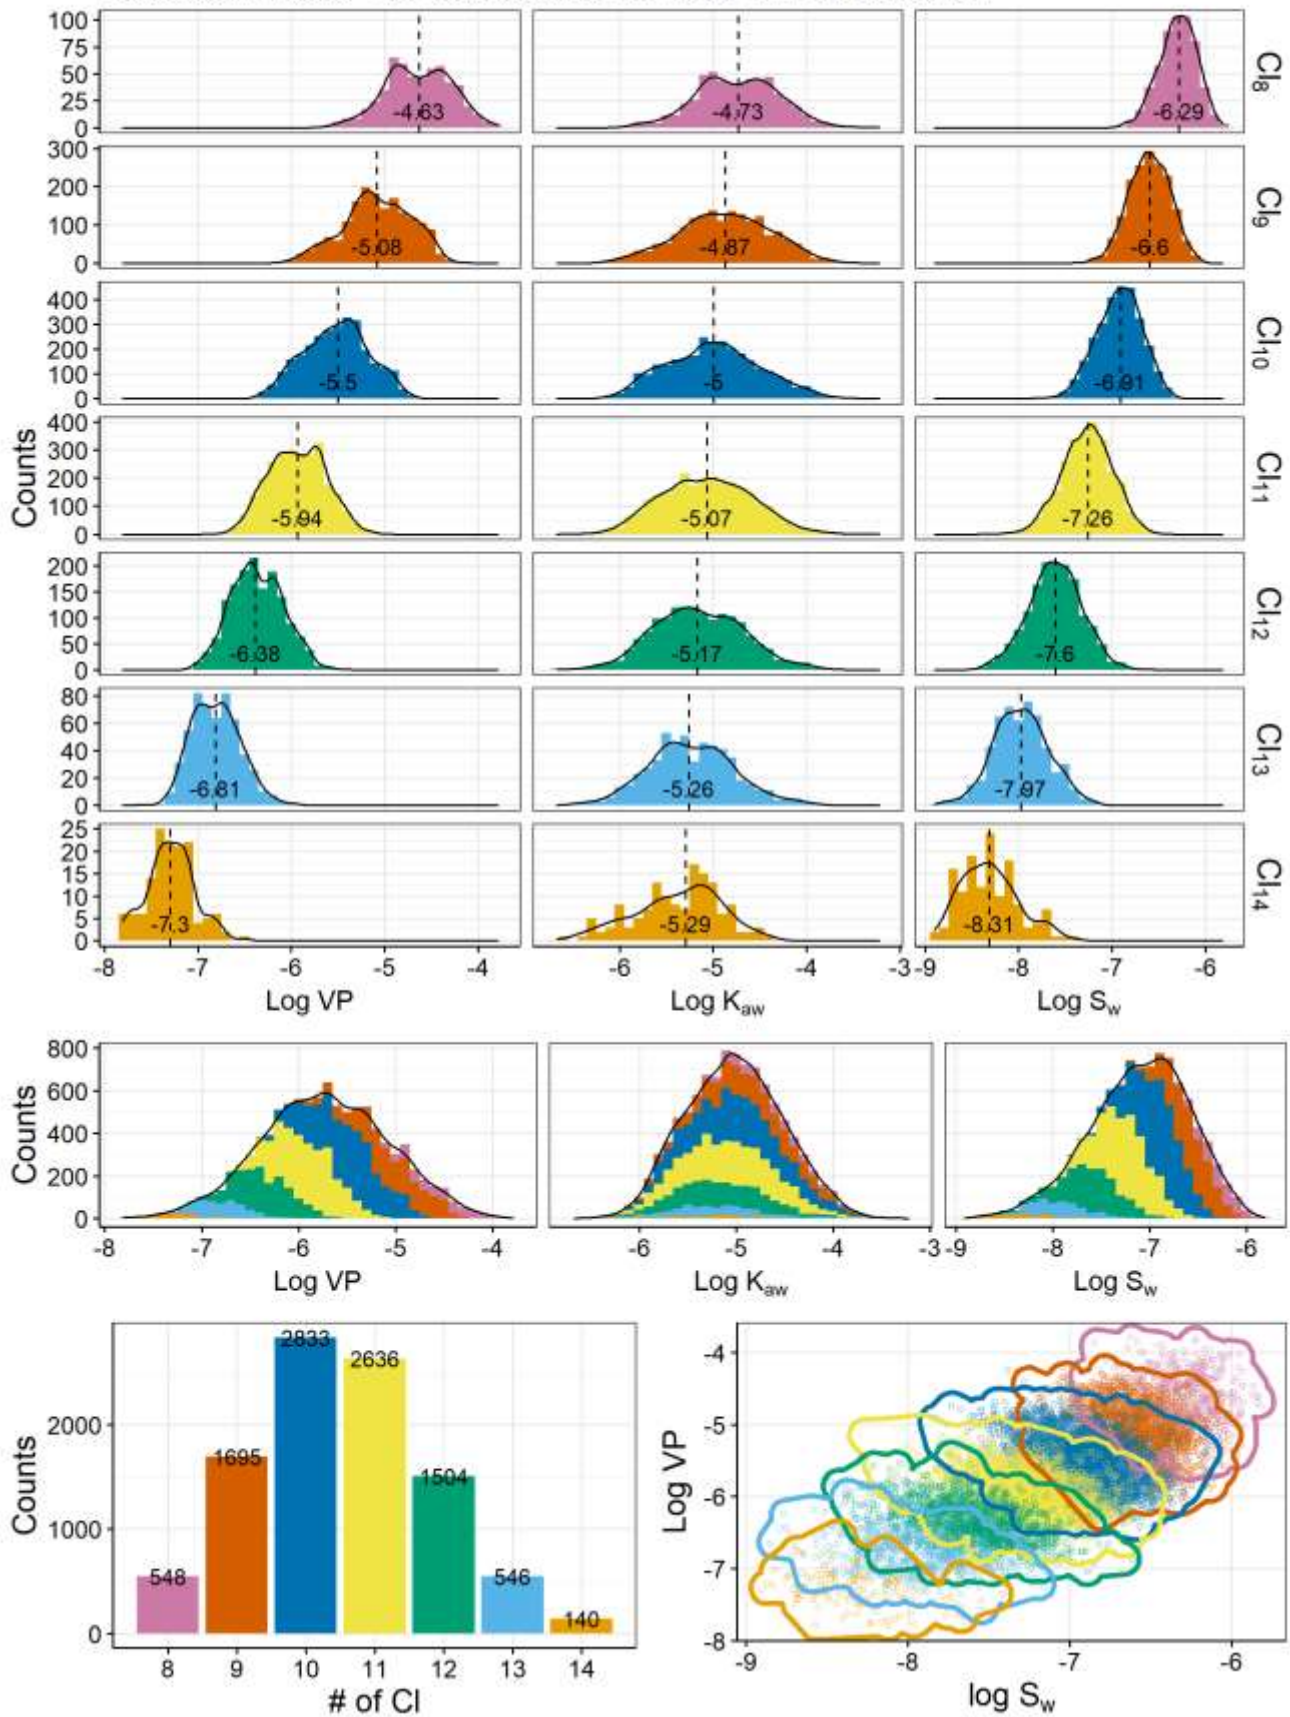

# C13, 30wt% CI

Total counts, 10,000; <100 counts omitted; bin width, 0.1; values, median

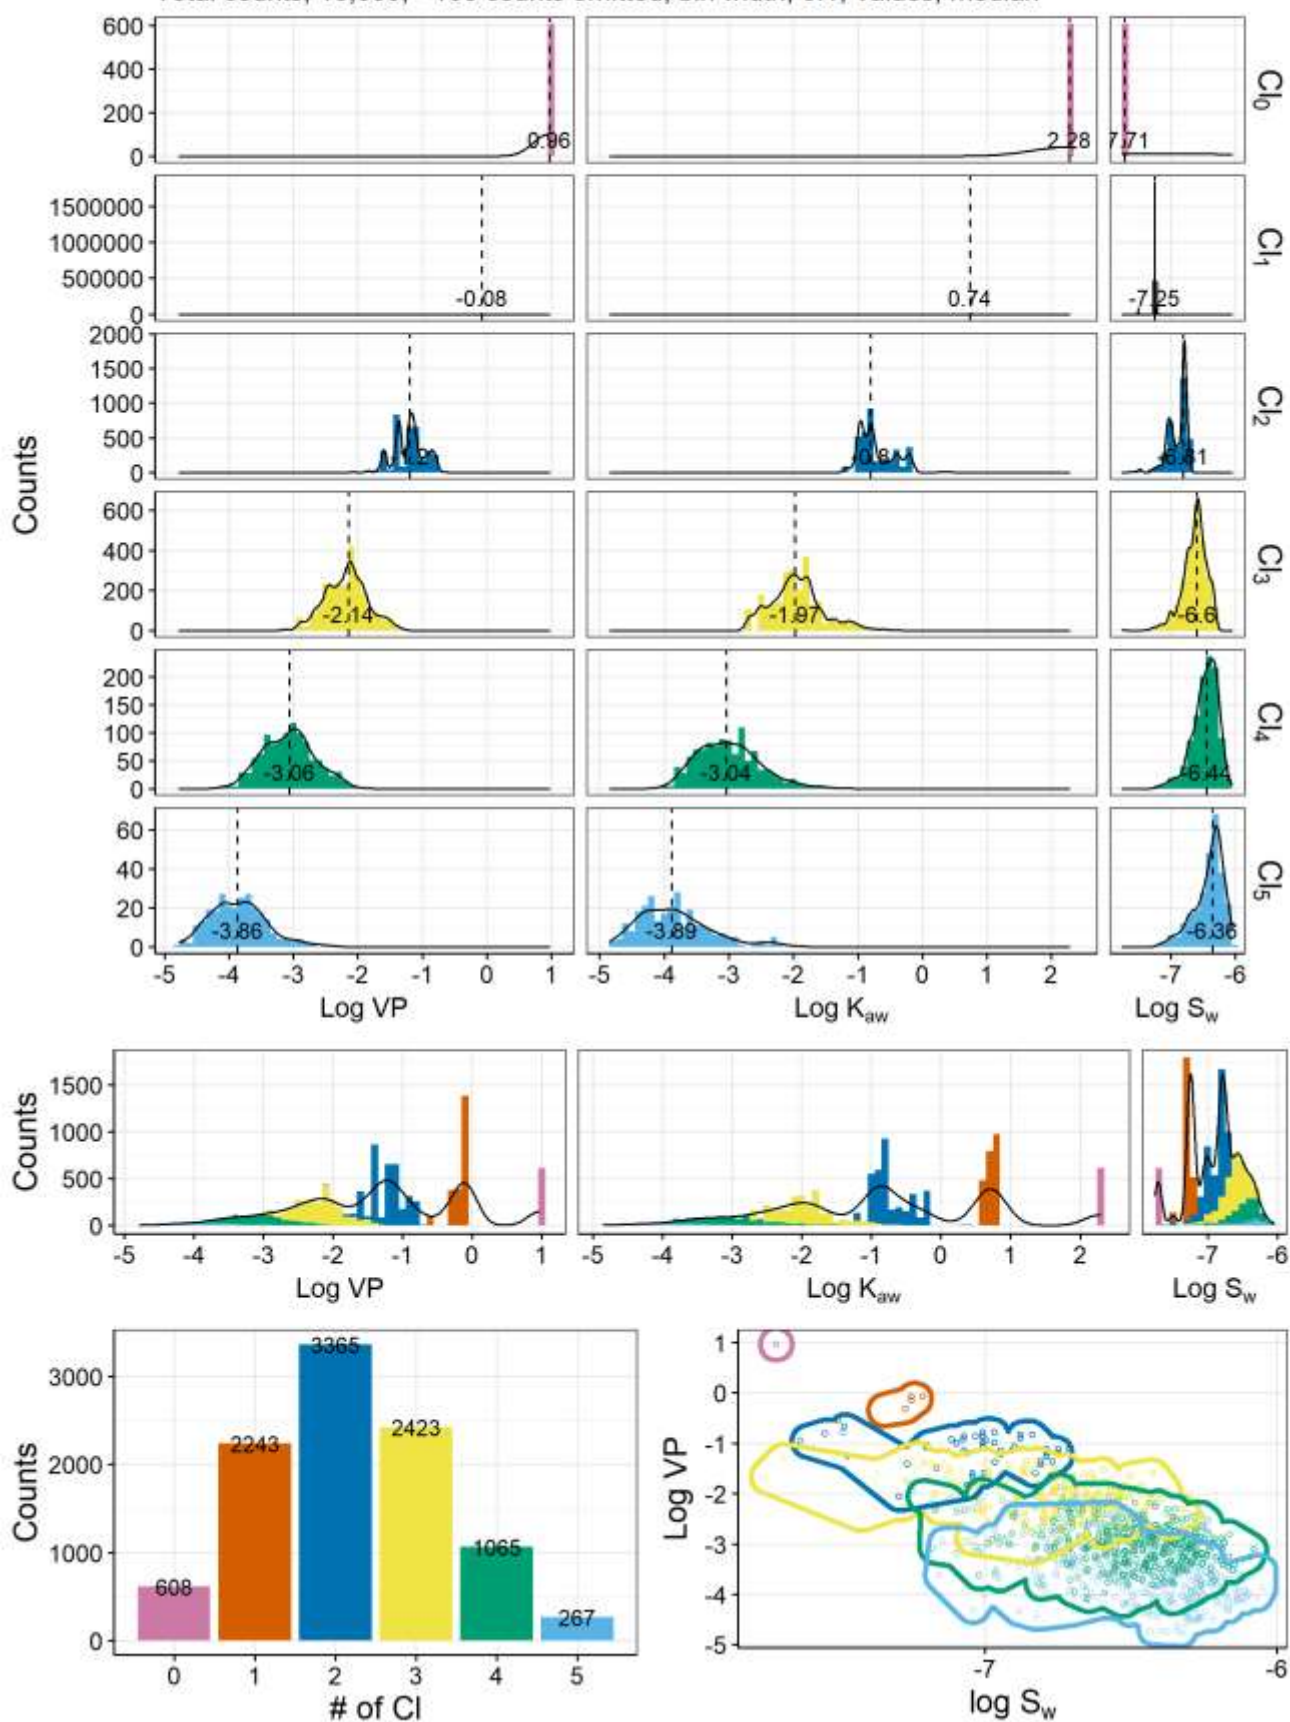



# C13, 40wt% CI

Total counts, 10,000; <100 counts omitted; bin width, 0.1; values, median

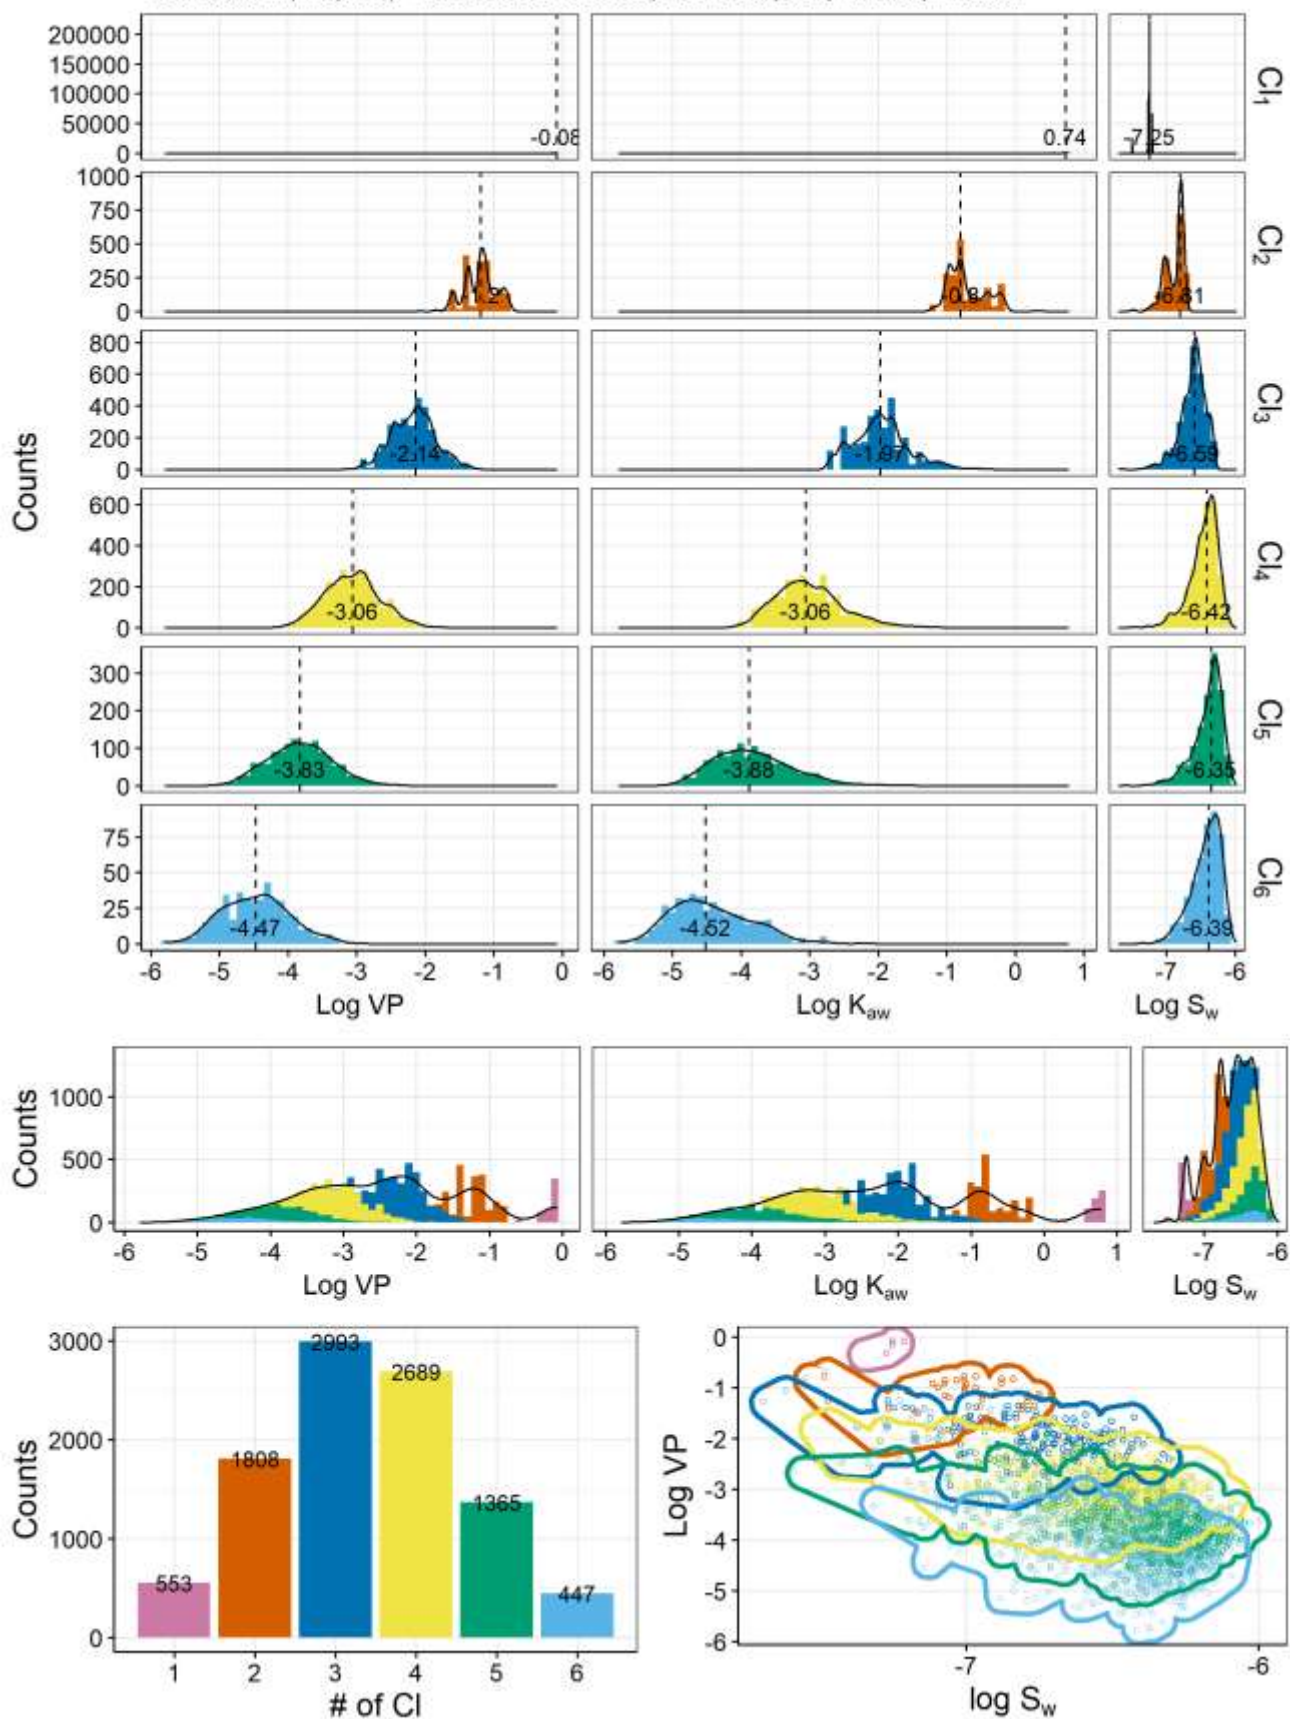

# C13, 50wt% CI

Total counts, 10,000; <100 counts omitted; bin width, 0.1; values, median

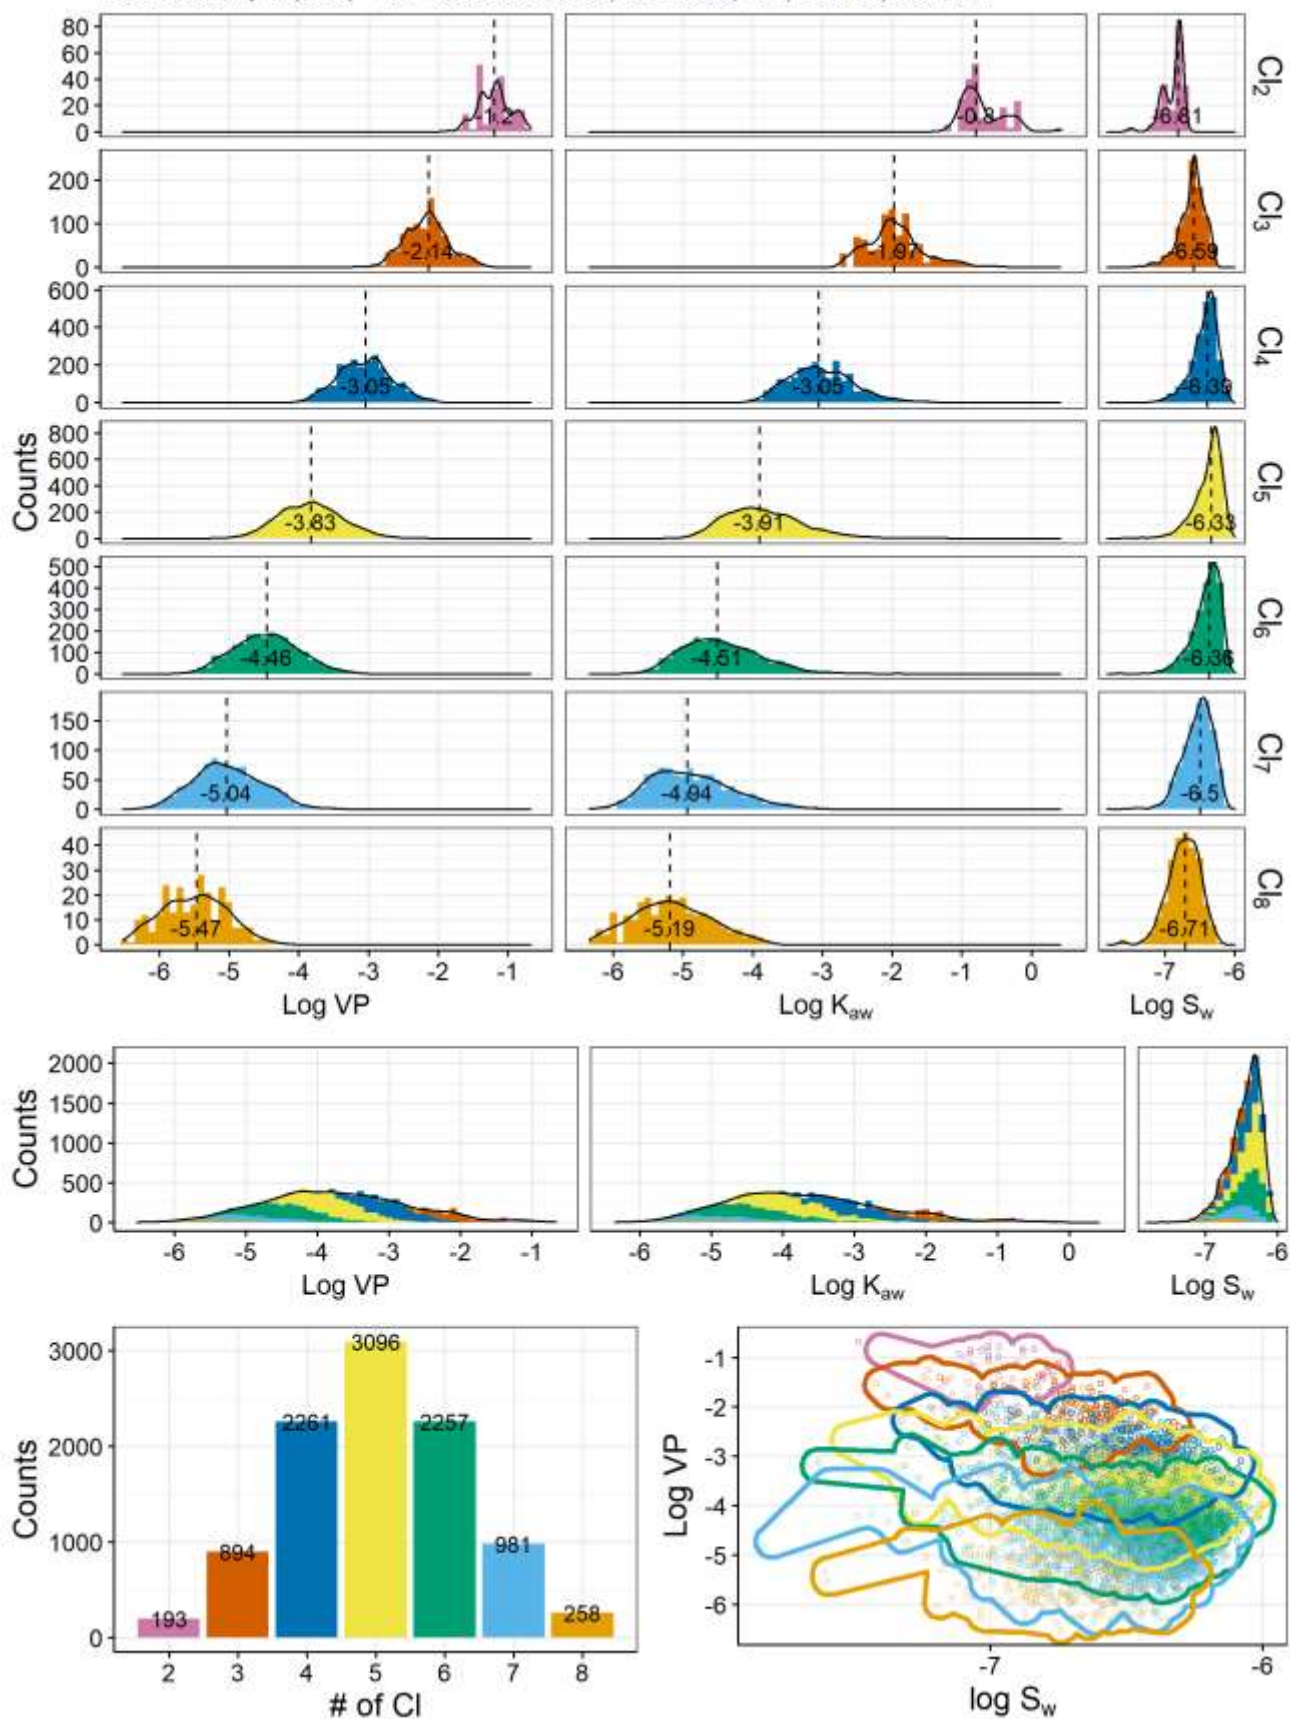

# C13, 60wt% CI

Total counts, 10,000; <100 counts omitted; bin width, 0.1; values, median

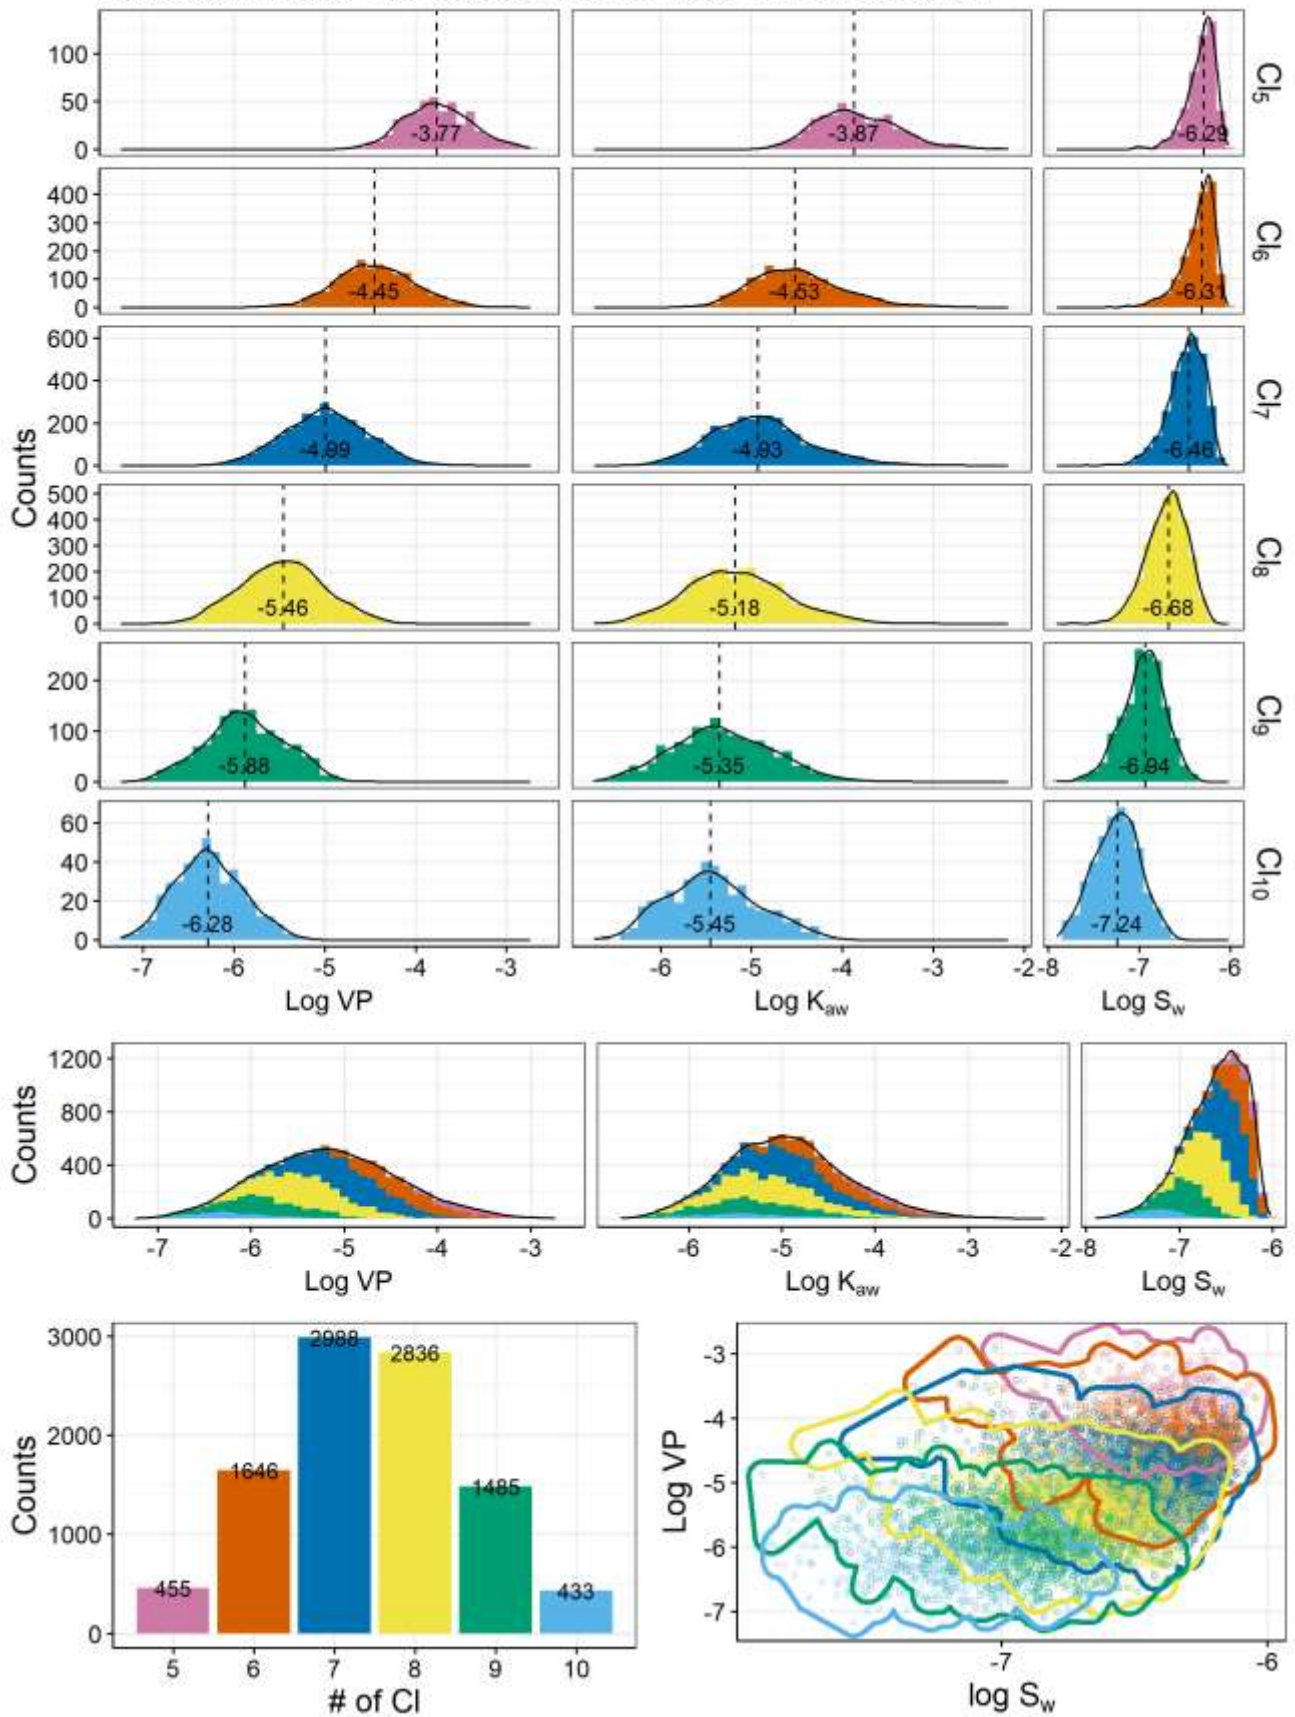



## C13, 70wt% CI

Total counts, 10,000; <100 counts omitted; bin width, 0.1; values, median

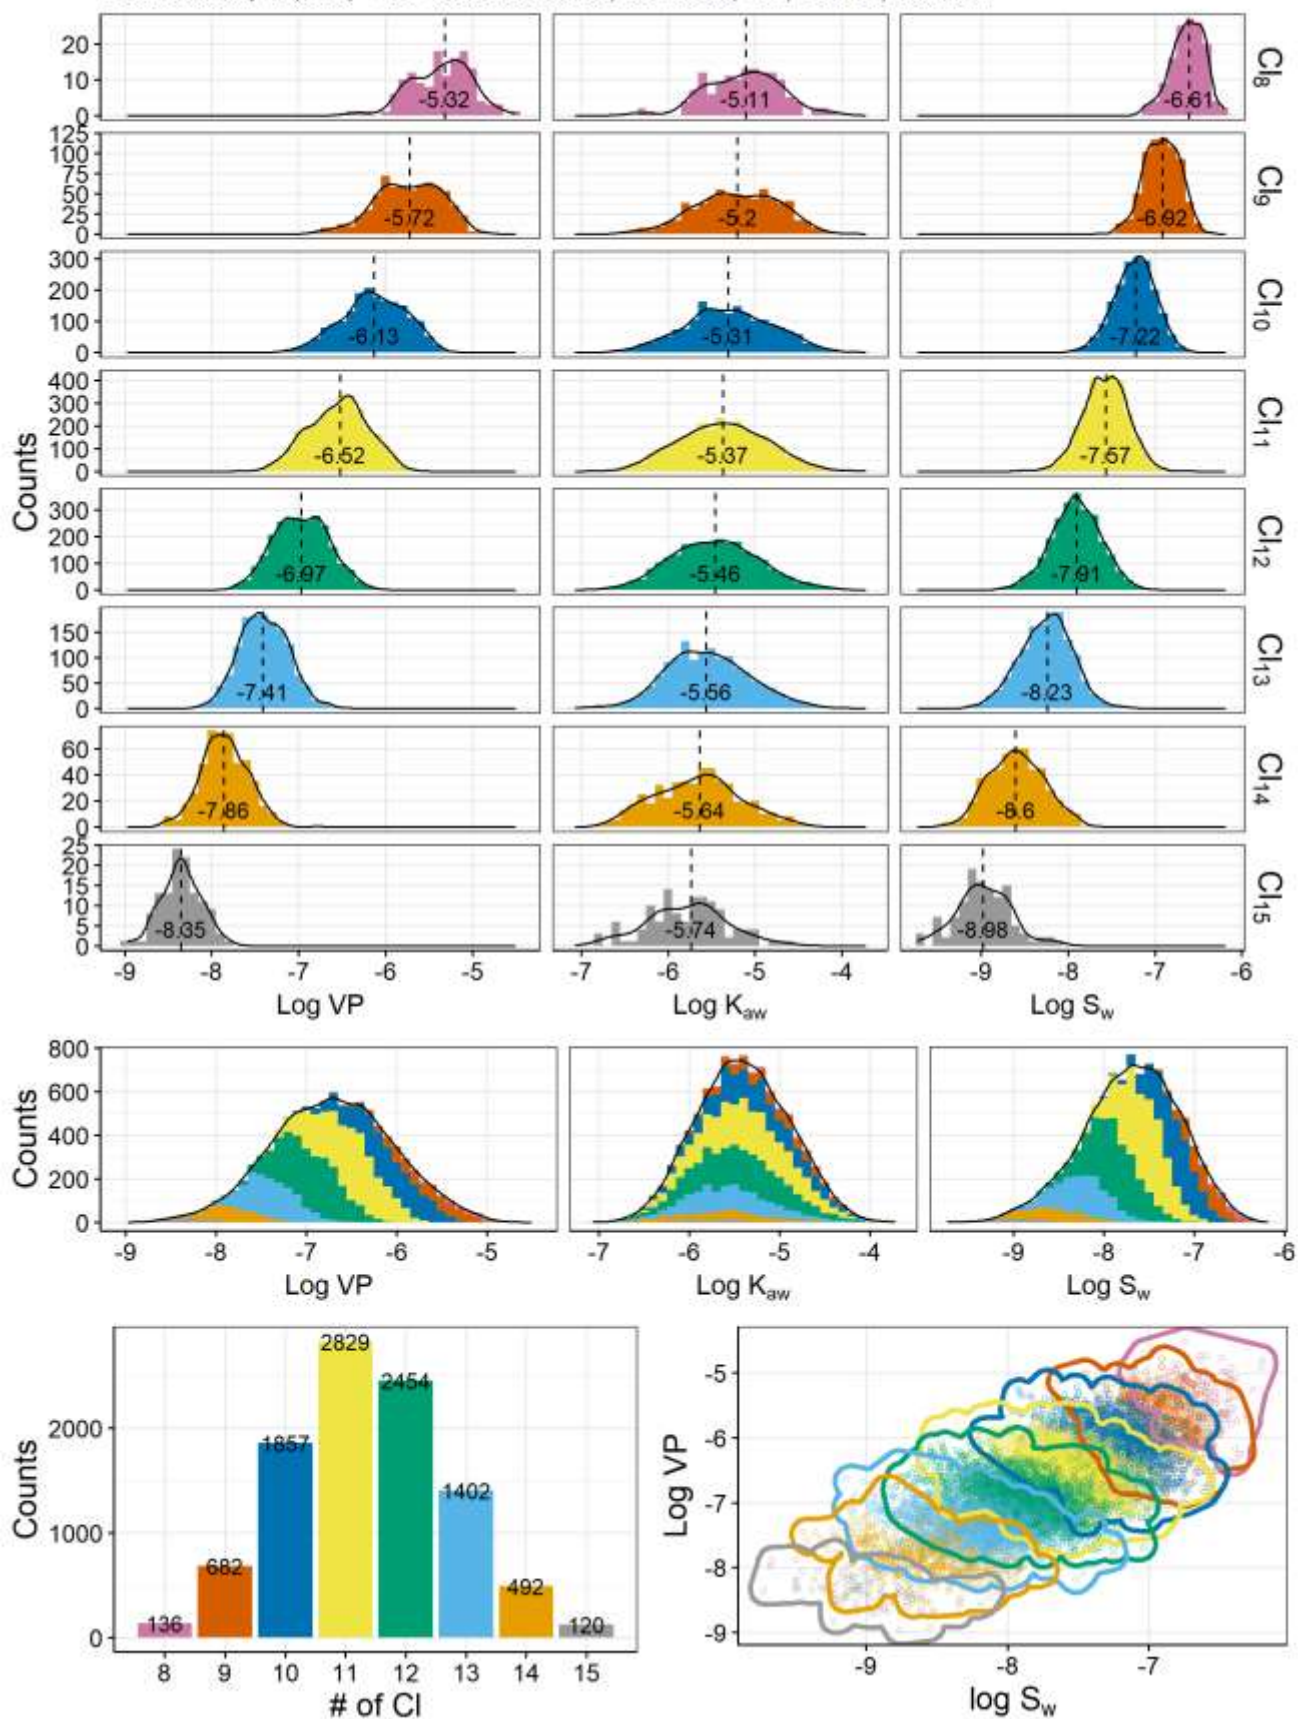

# C14, 30wt% CI

Total counts, 10,000; <100 counts omitted; bin width, 0.1; values, median

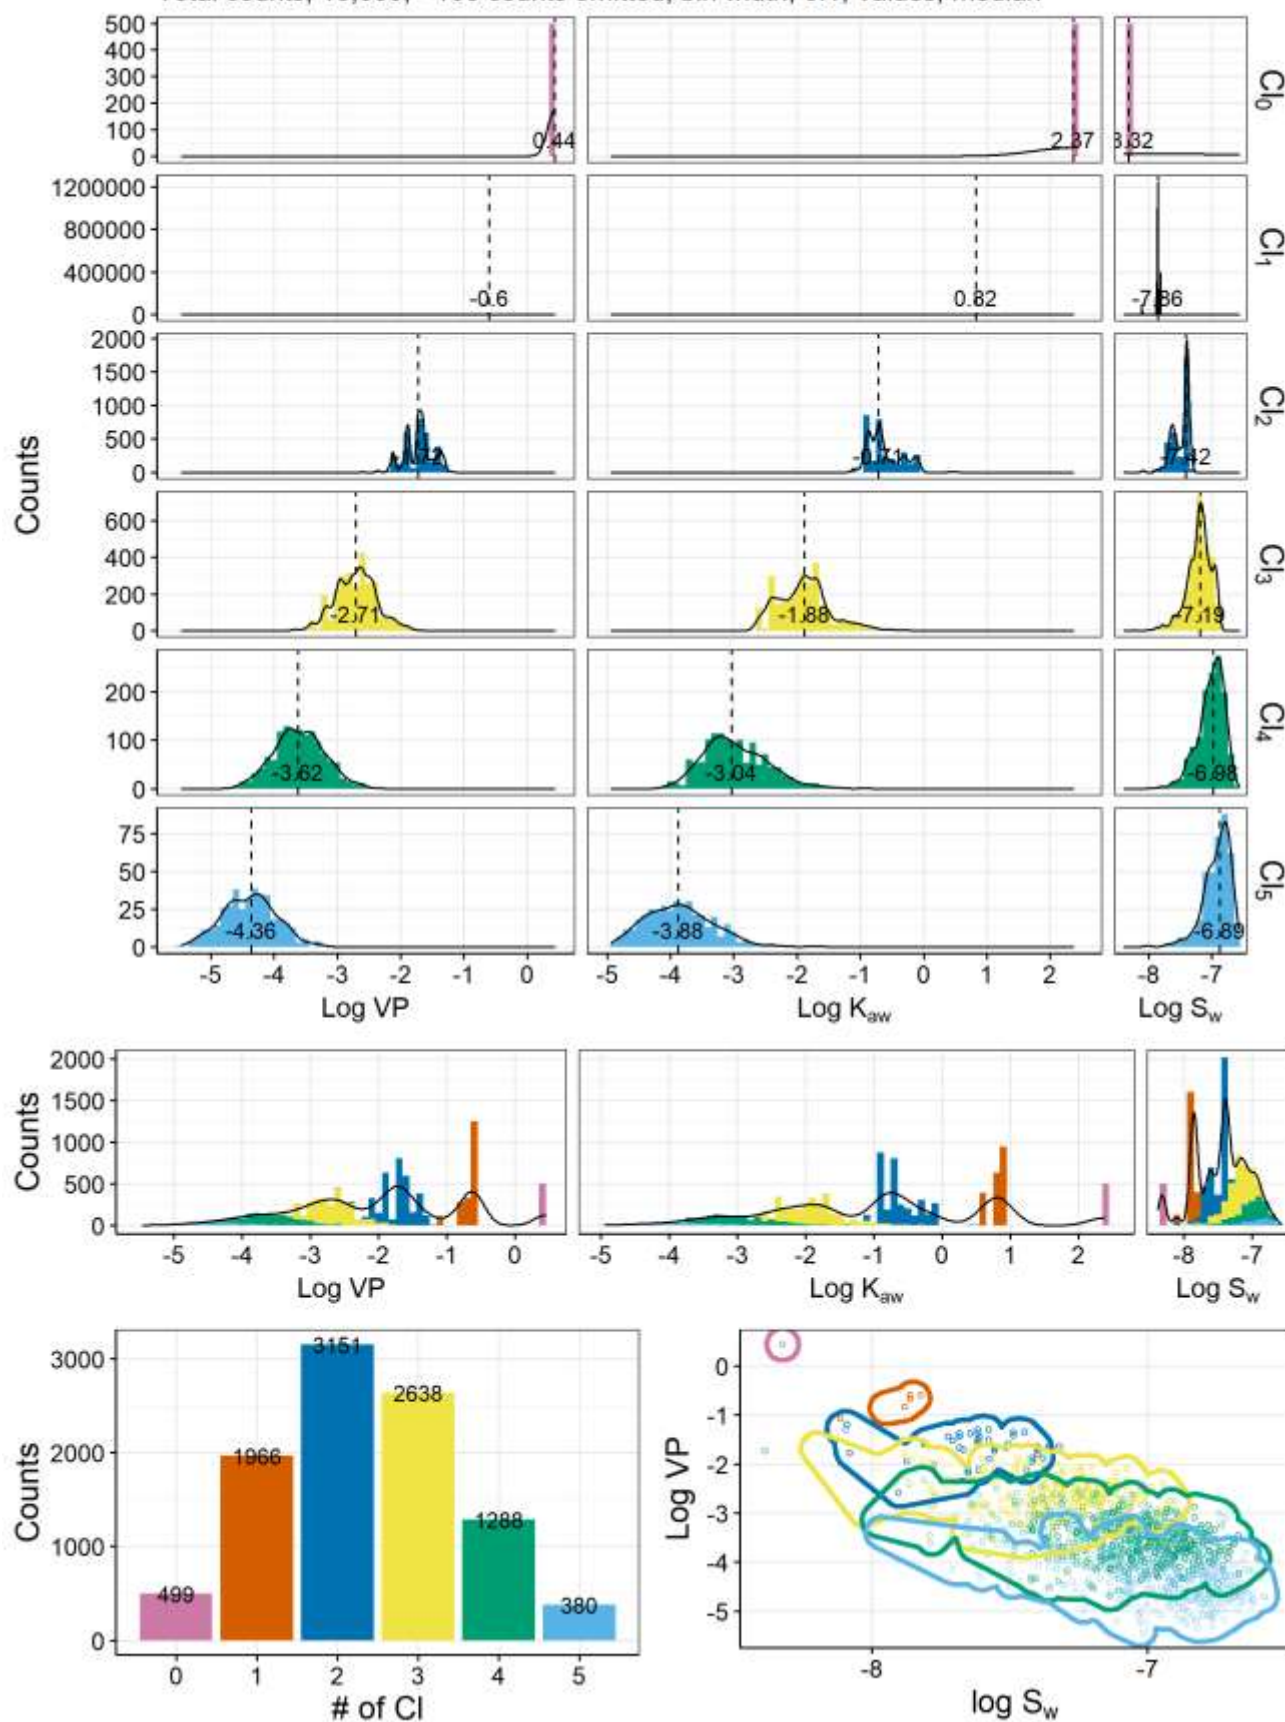

## C14, 40wt% CI

Total counts, 10,000; <100 counts omitted; bin width, 0.1; values, median

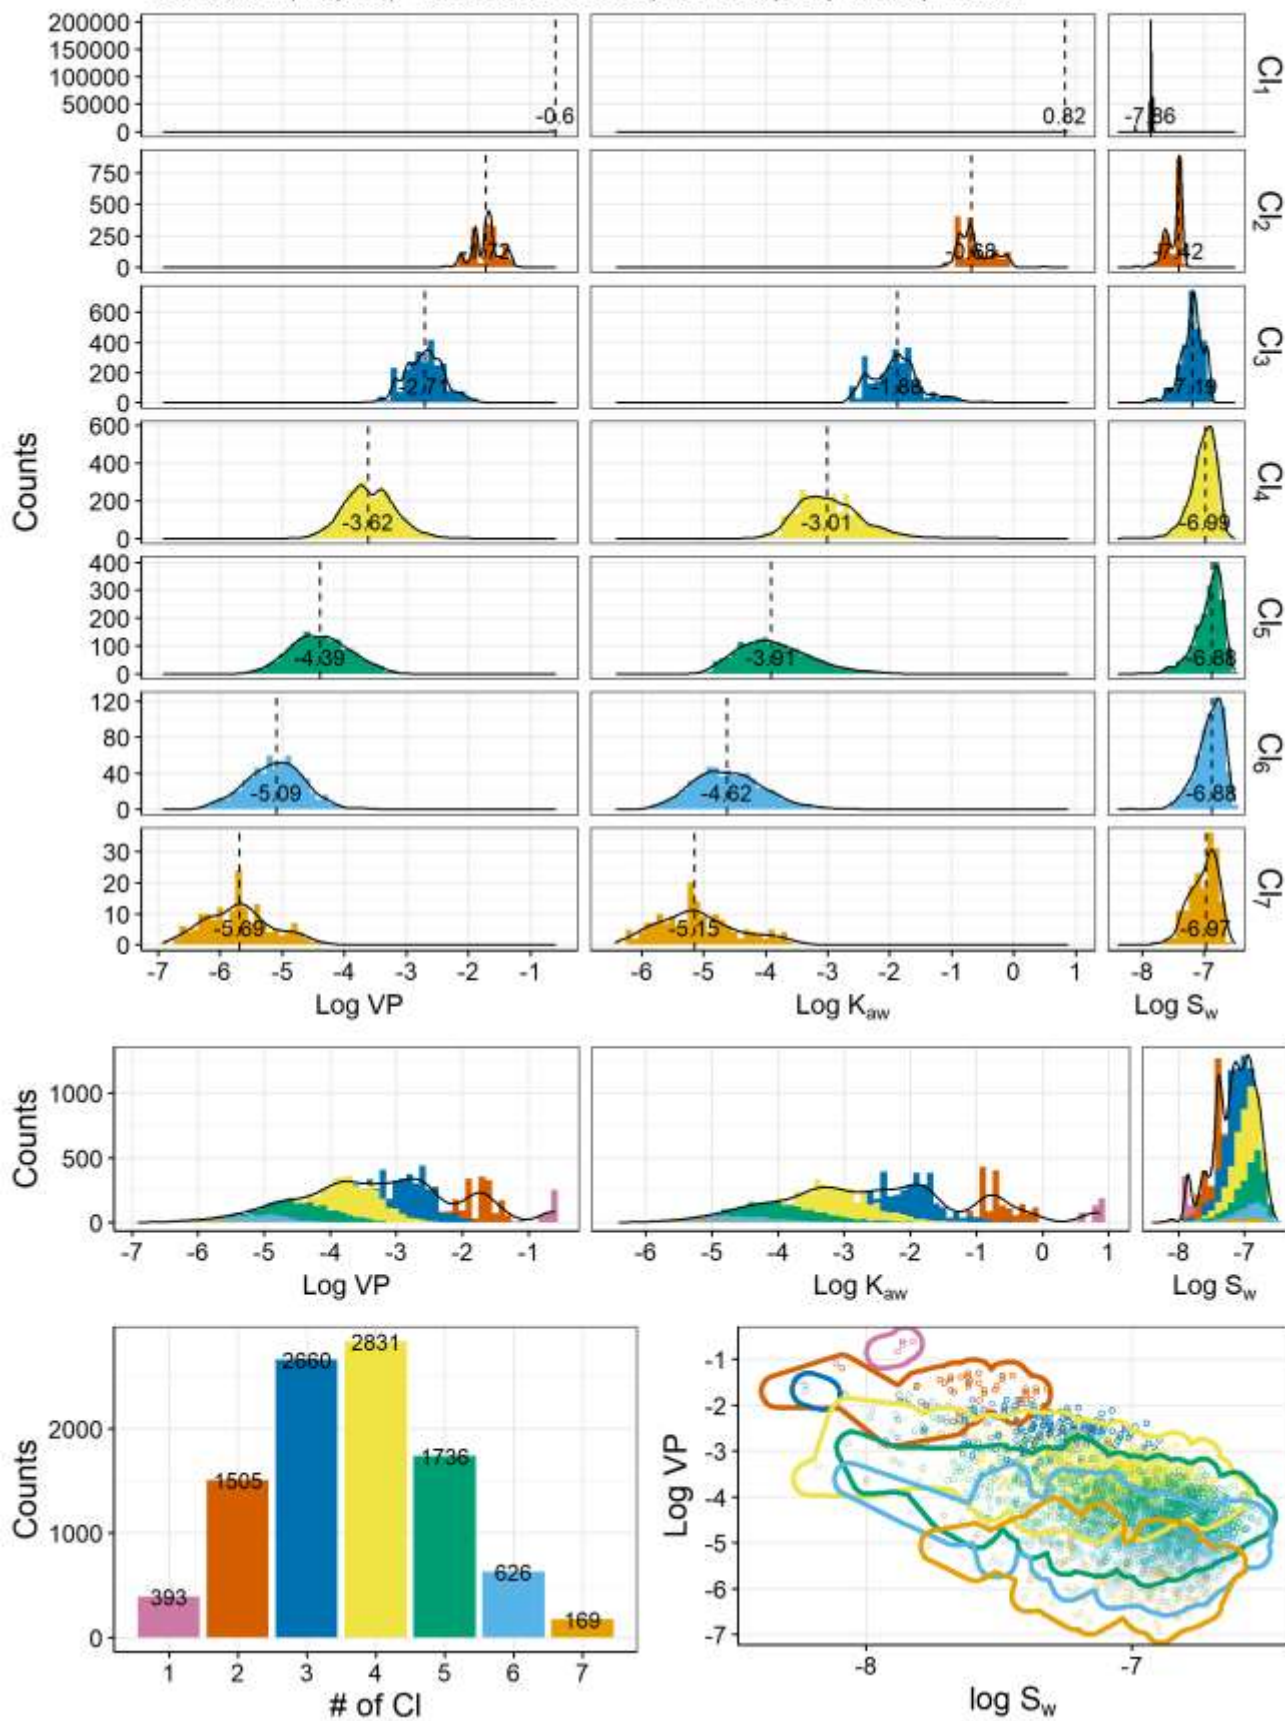



# C14, 50wt% CI

Total counts, 10,000; <100 counts omitted; bin width, 0.1; values, median

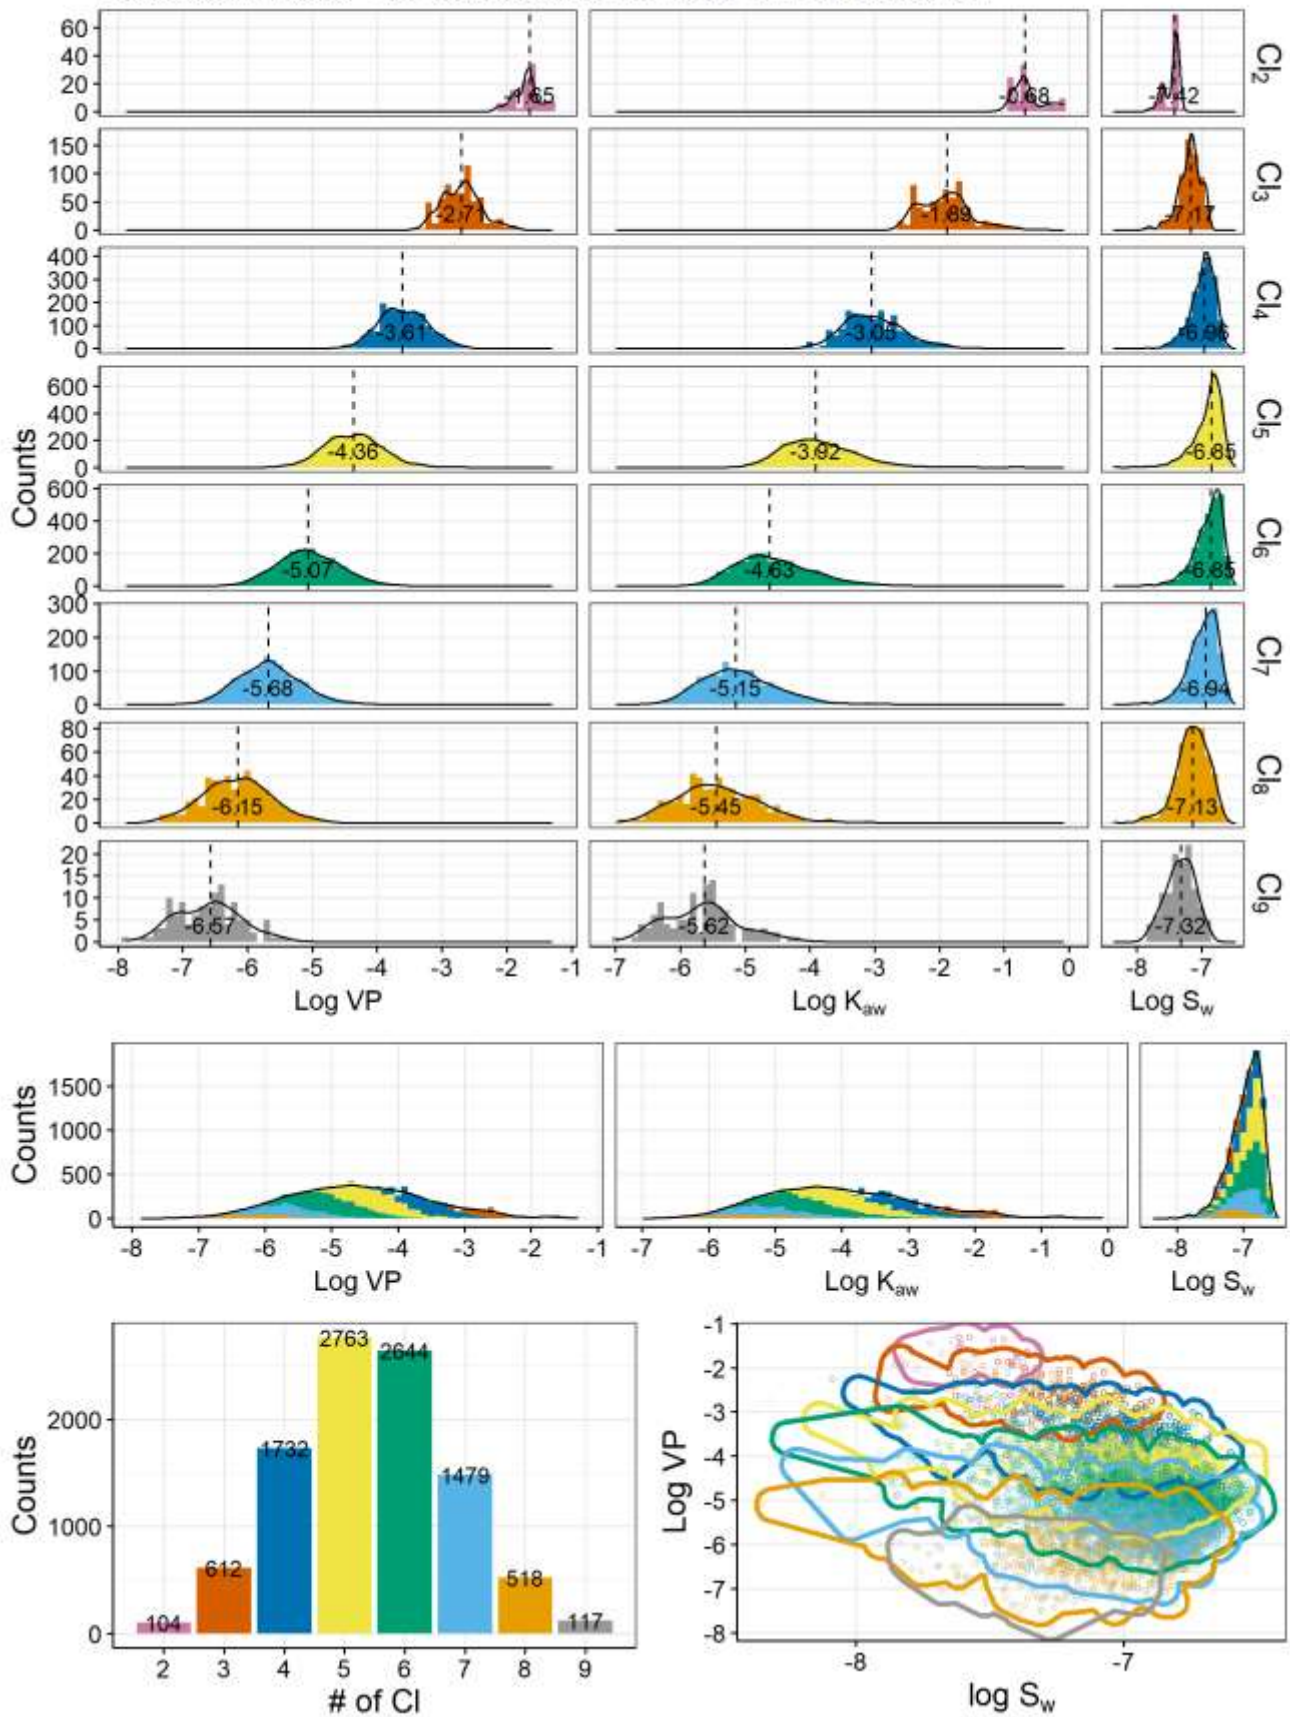

# C14, 60wt% CI

Total counts, 10,000; <100 counts omitted; bin width, 0.1; values, median

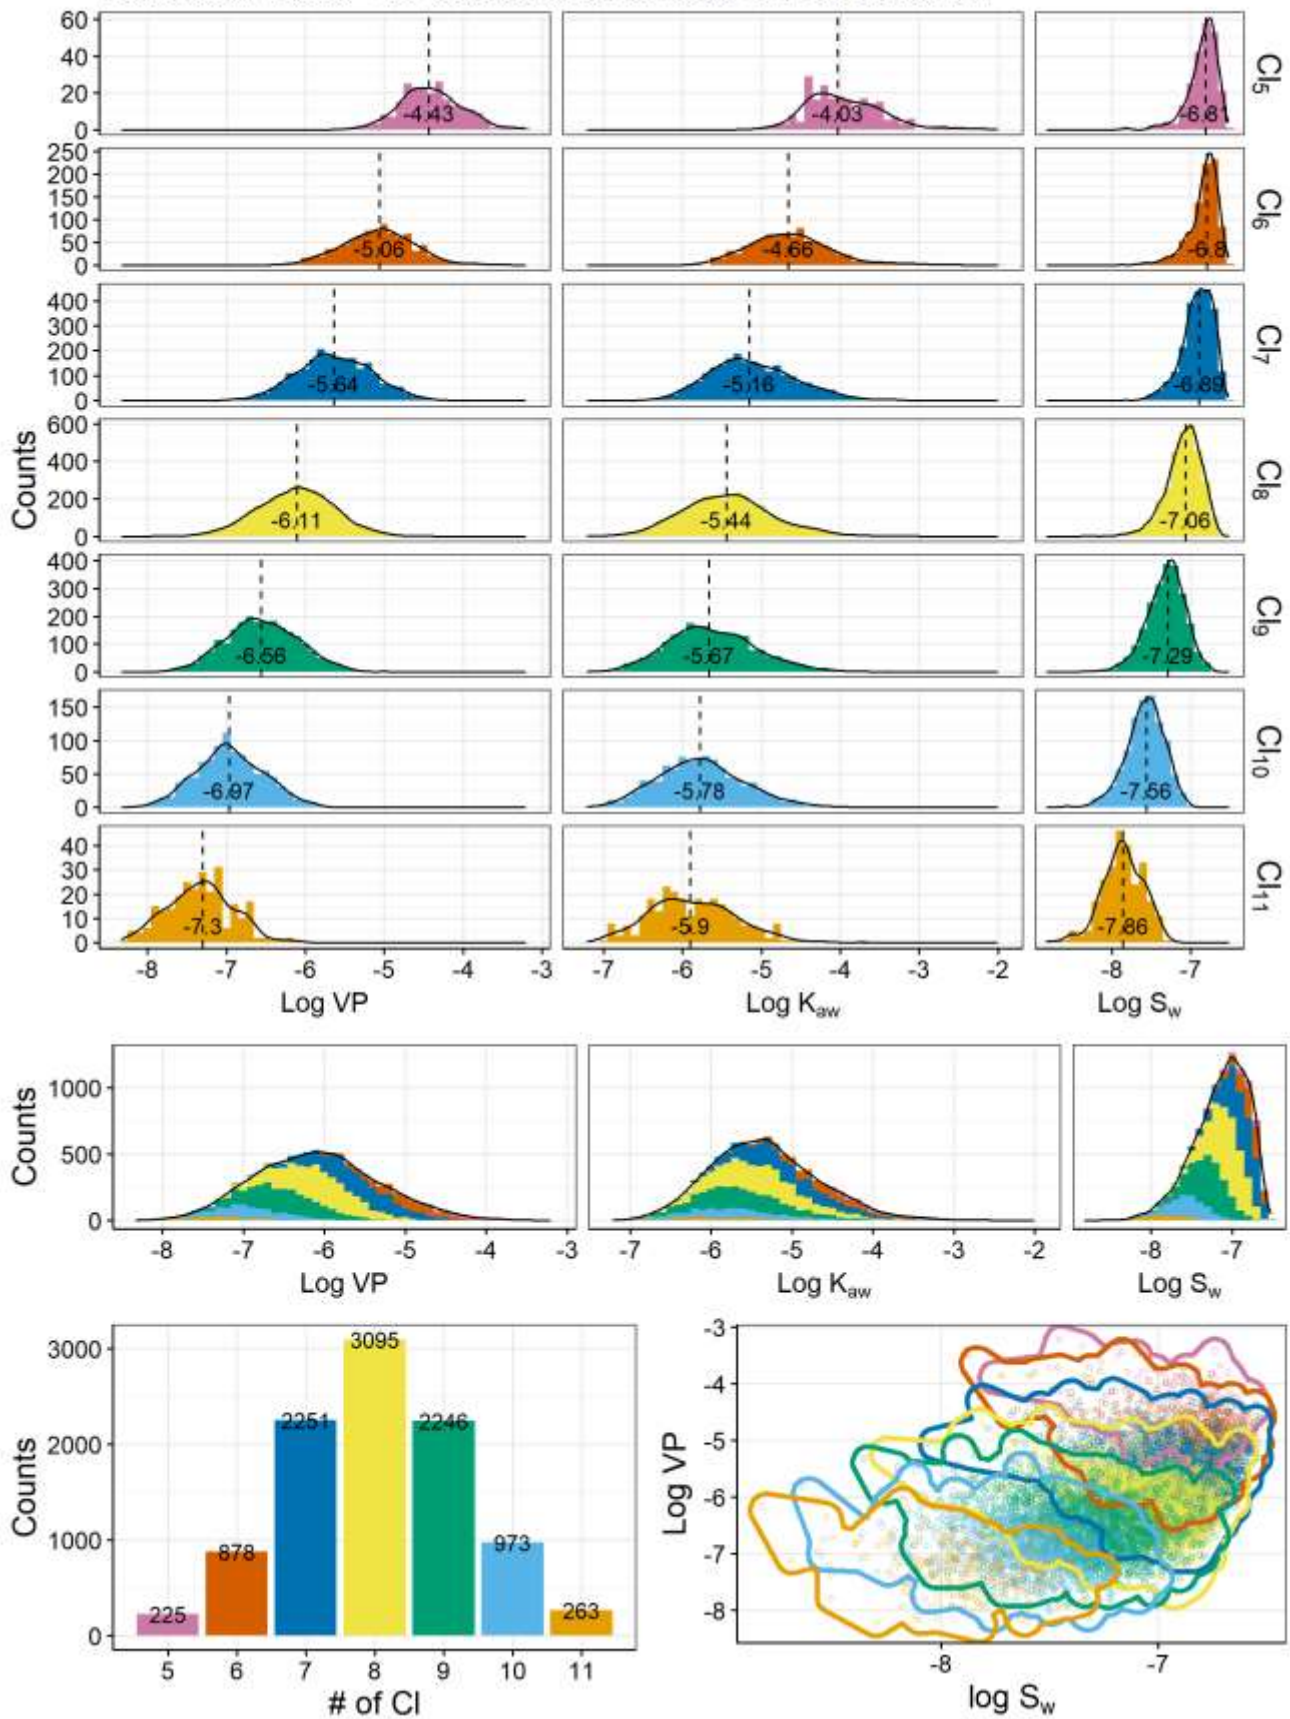

## C14, 70wt% CI

Total counts, 10,000; <100 counts omitted; bin width, 0.1; values, median

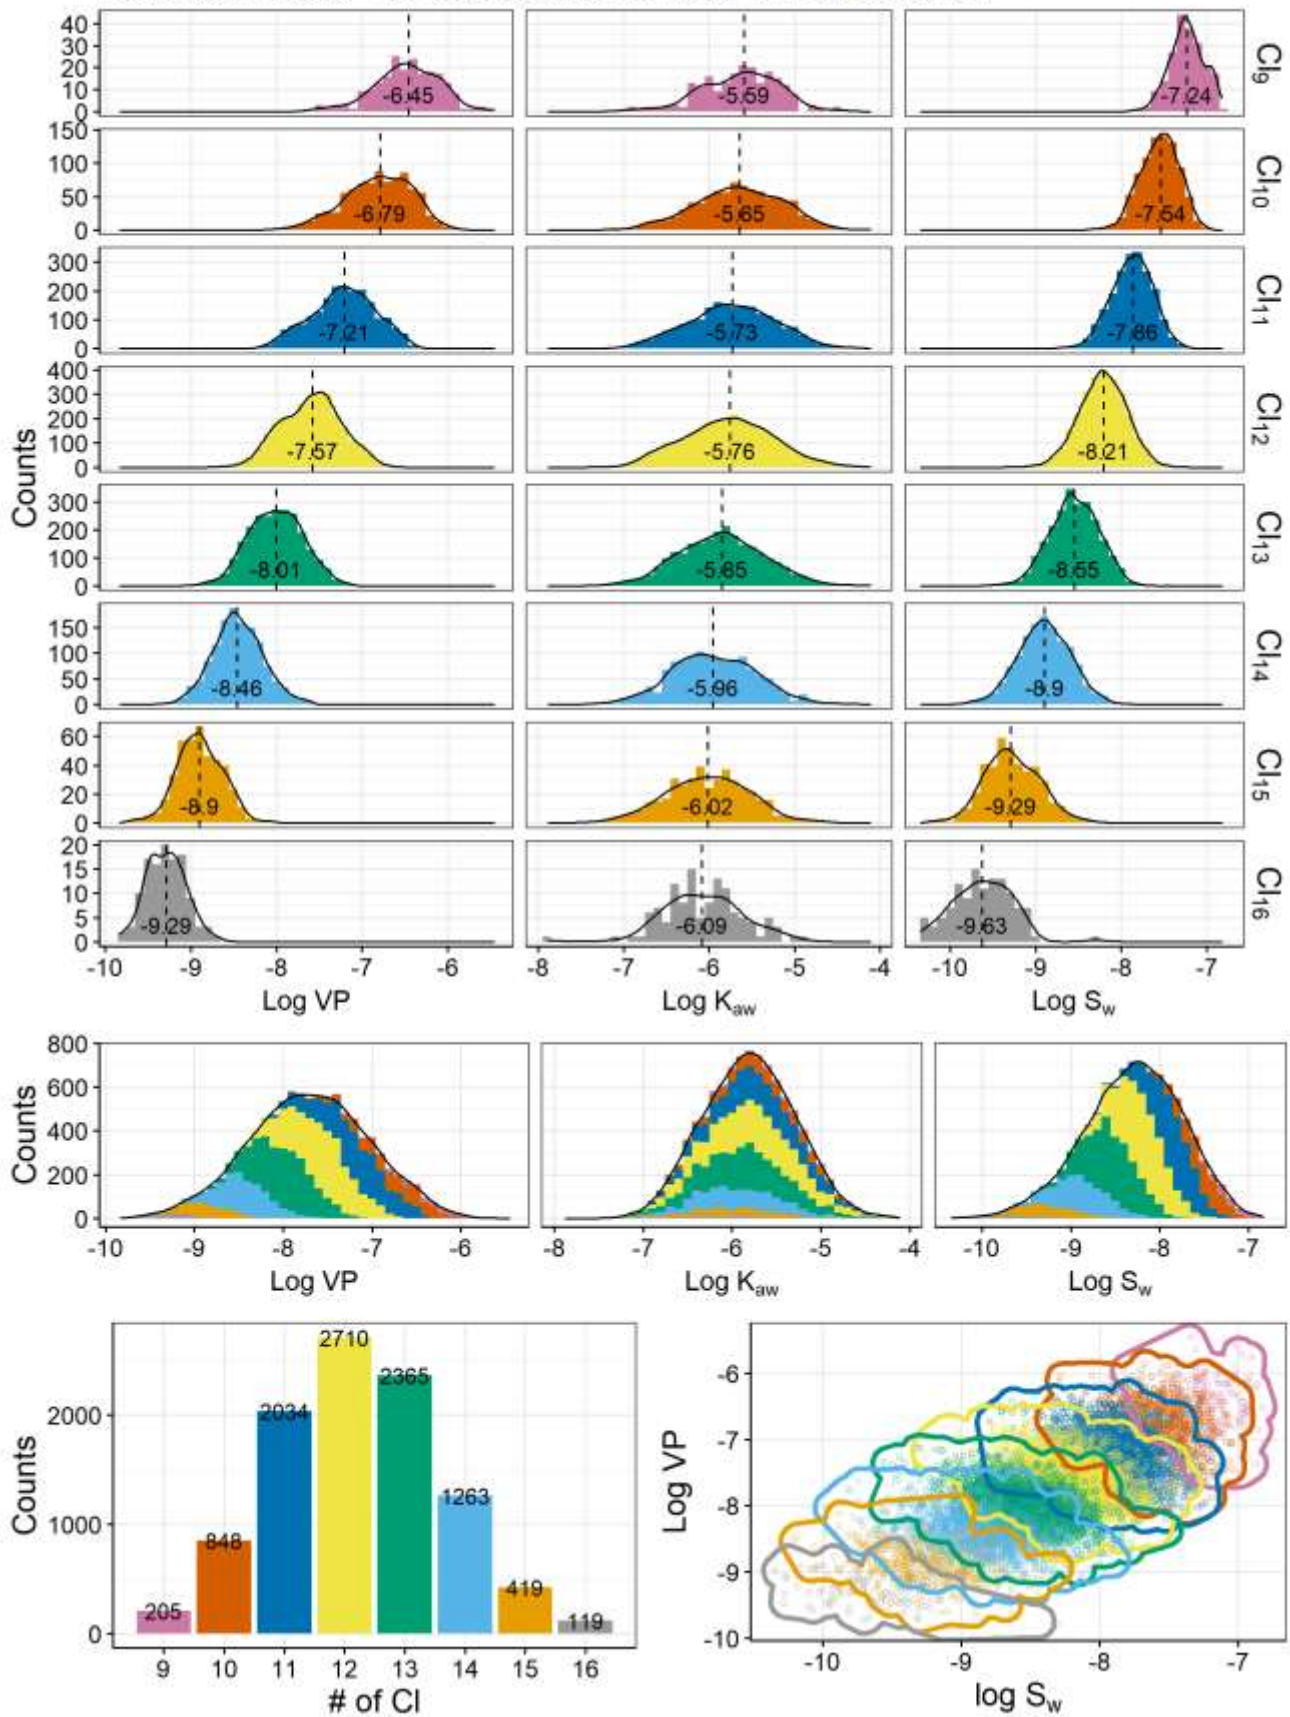



# C15, 30wt% CI

Total counts, 10,000; <100 counts omitted; bin width, 0.1; values, median

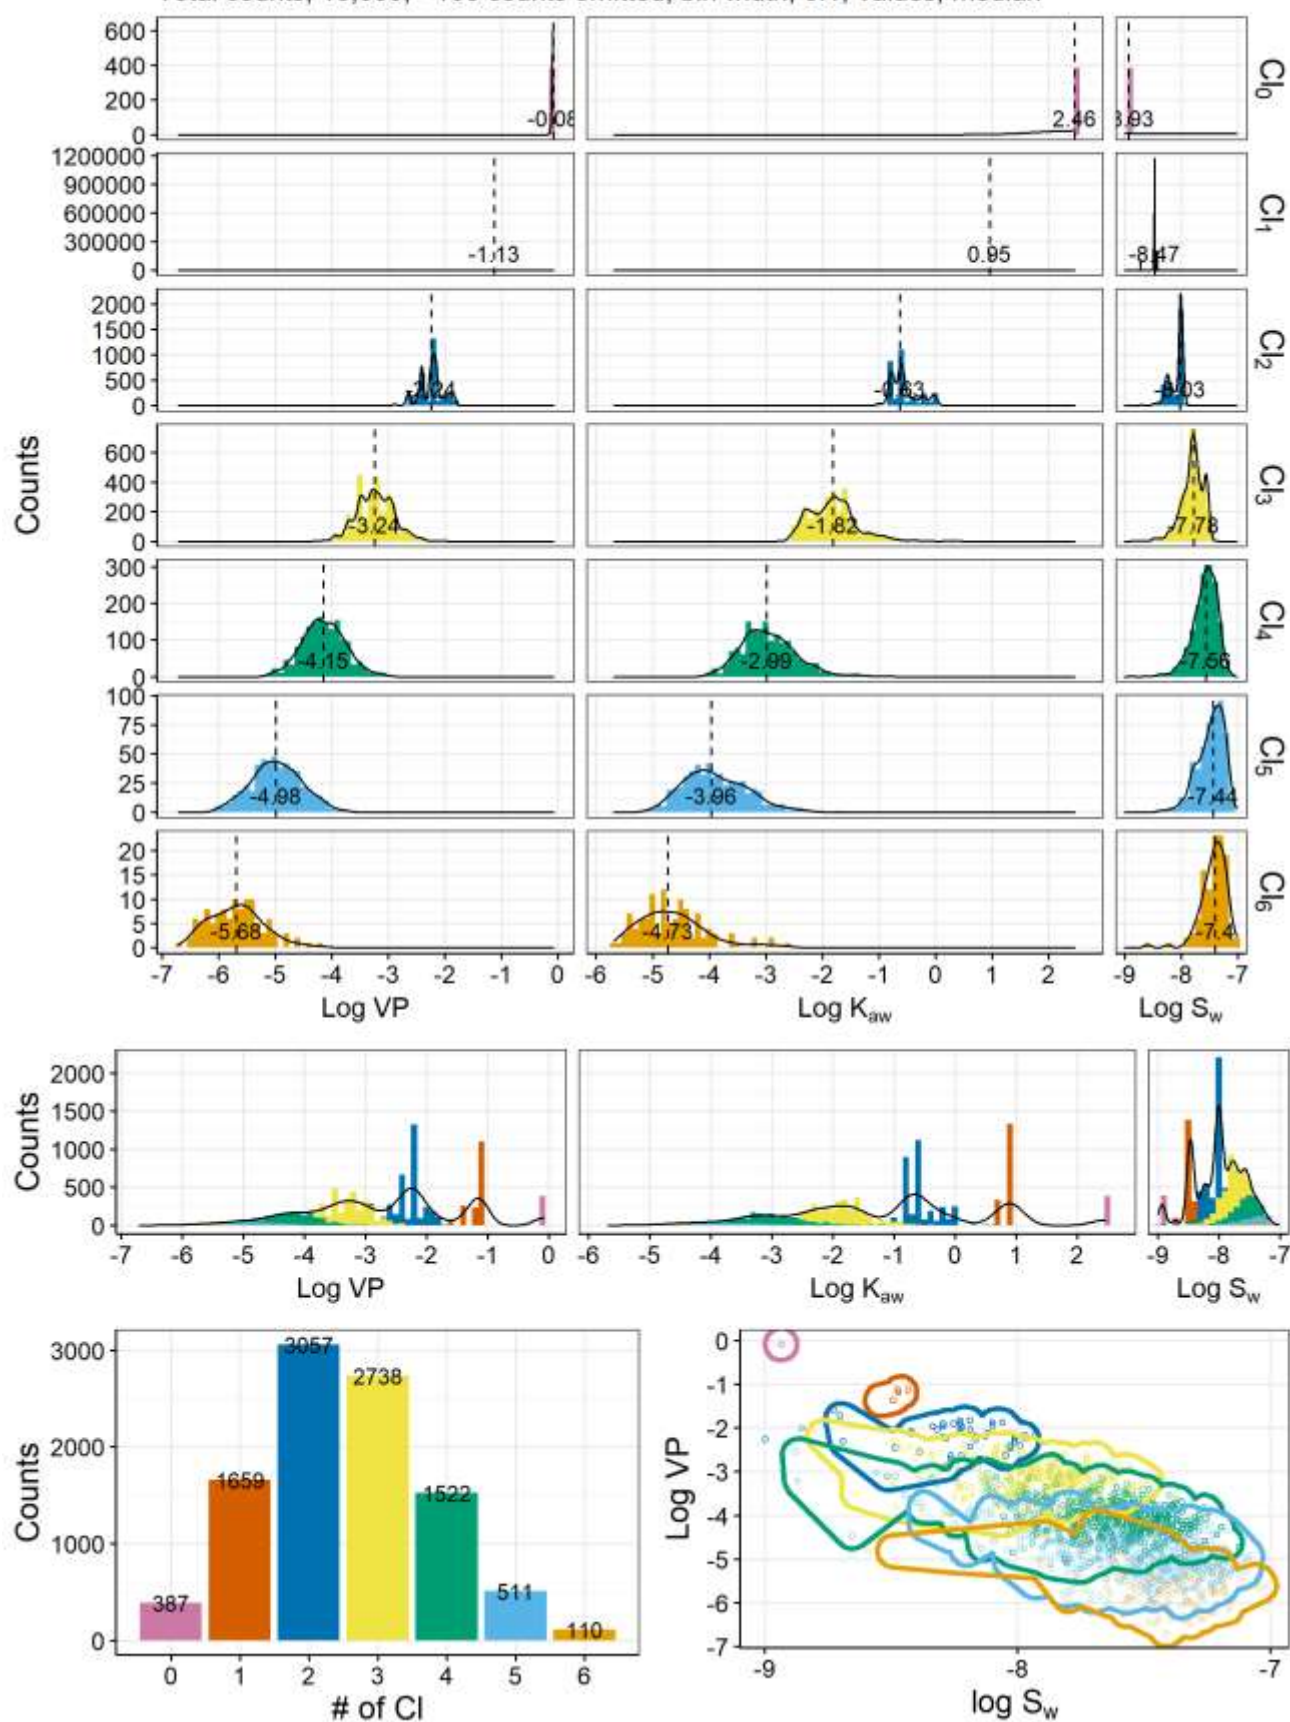

# C15, 40wt% CI

Total counts, 10,000; <100 counts omitted; bin width, 0.1; values, median

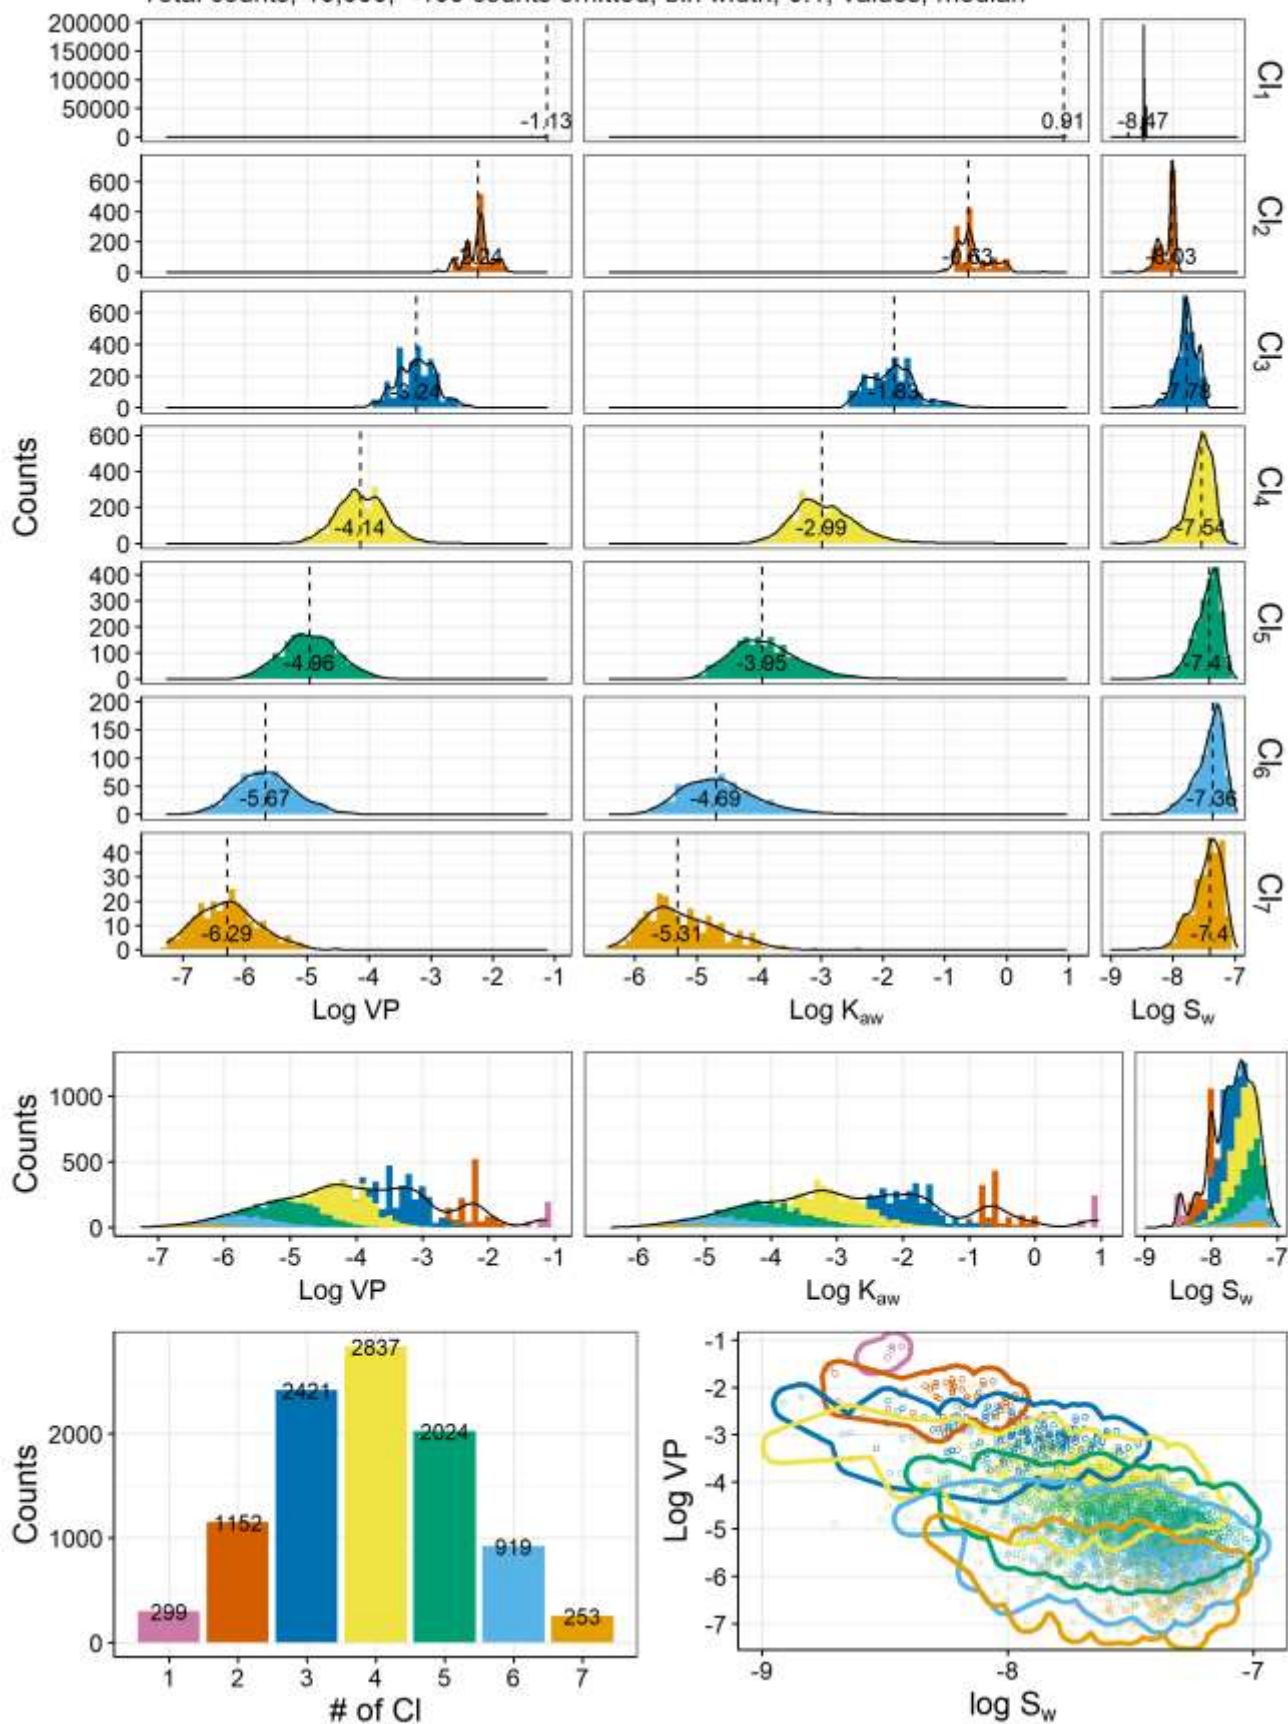

# C15, 50wt% CI

Total counts, 10,000; <100 counts omitted; bin width, 0.1; values, median

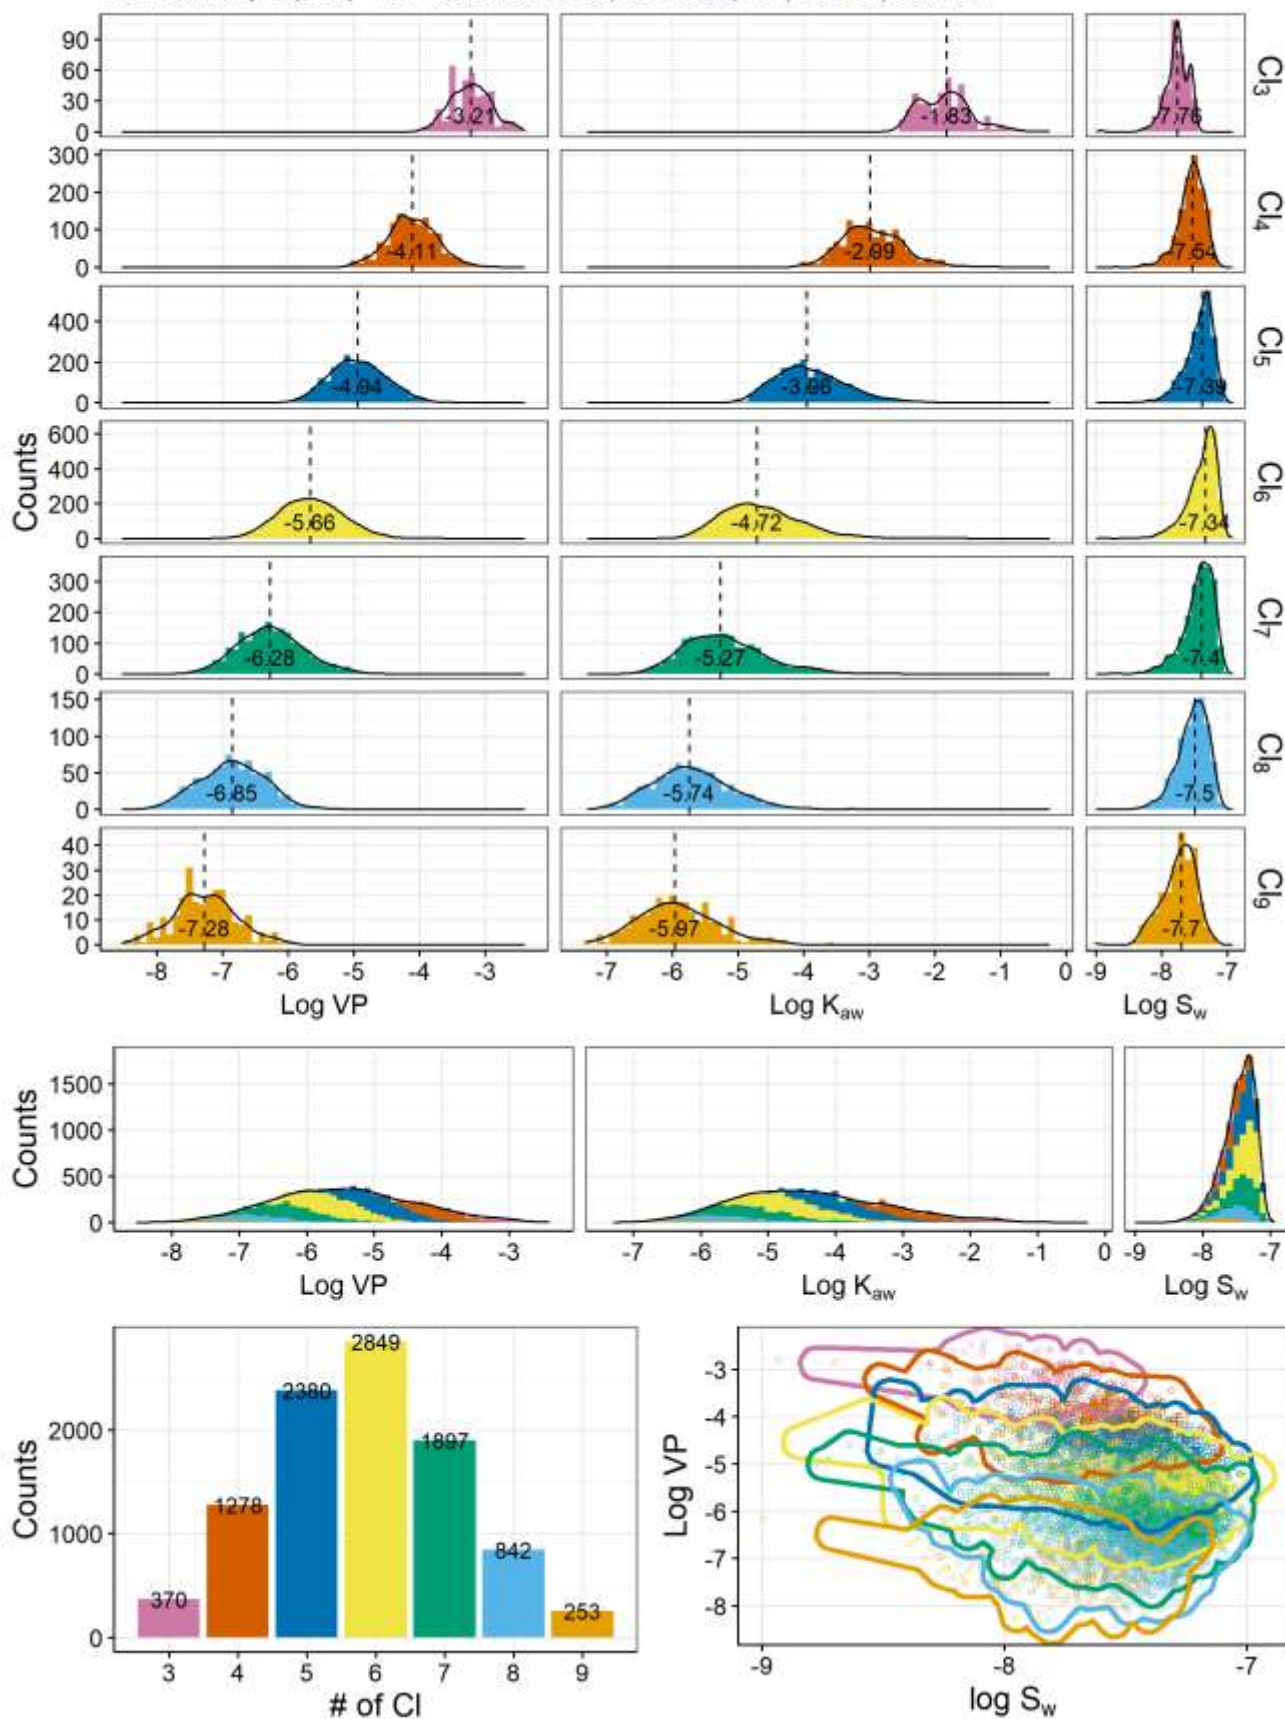



# C15, 60wt% CI

Total counts, 10,000; <100 counts omitted; bin width, 0.1; values, median

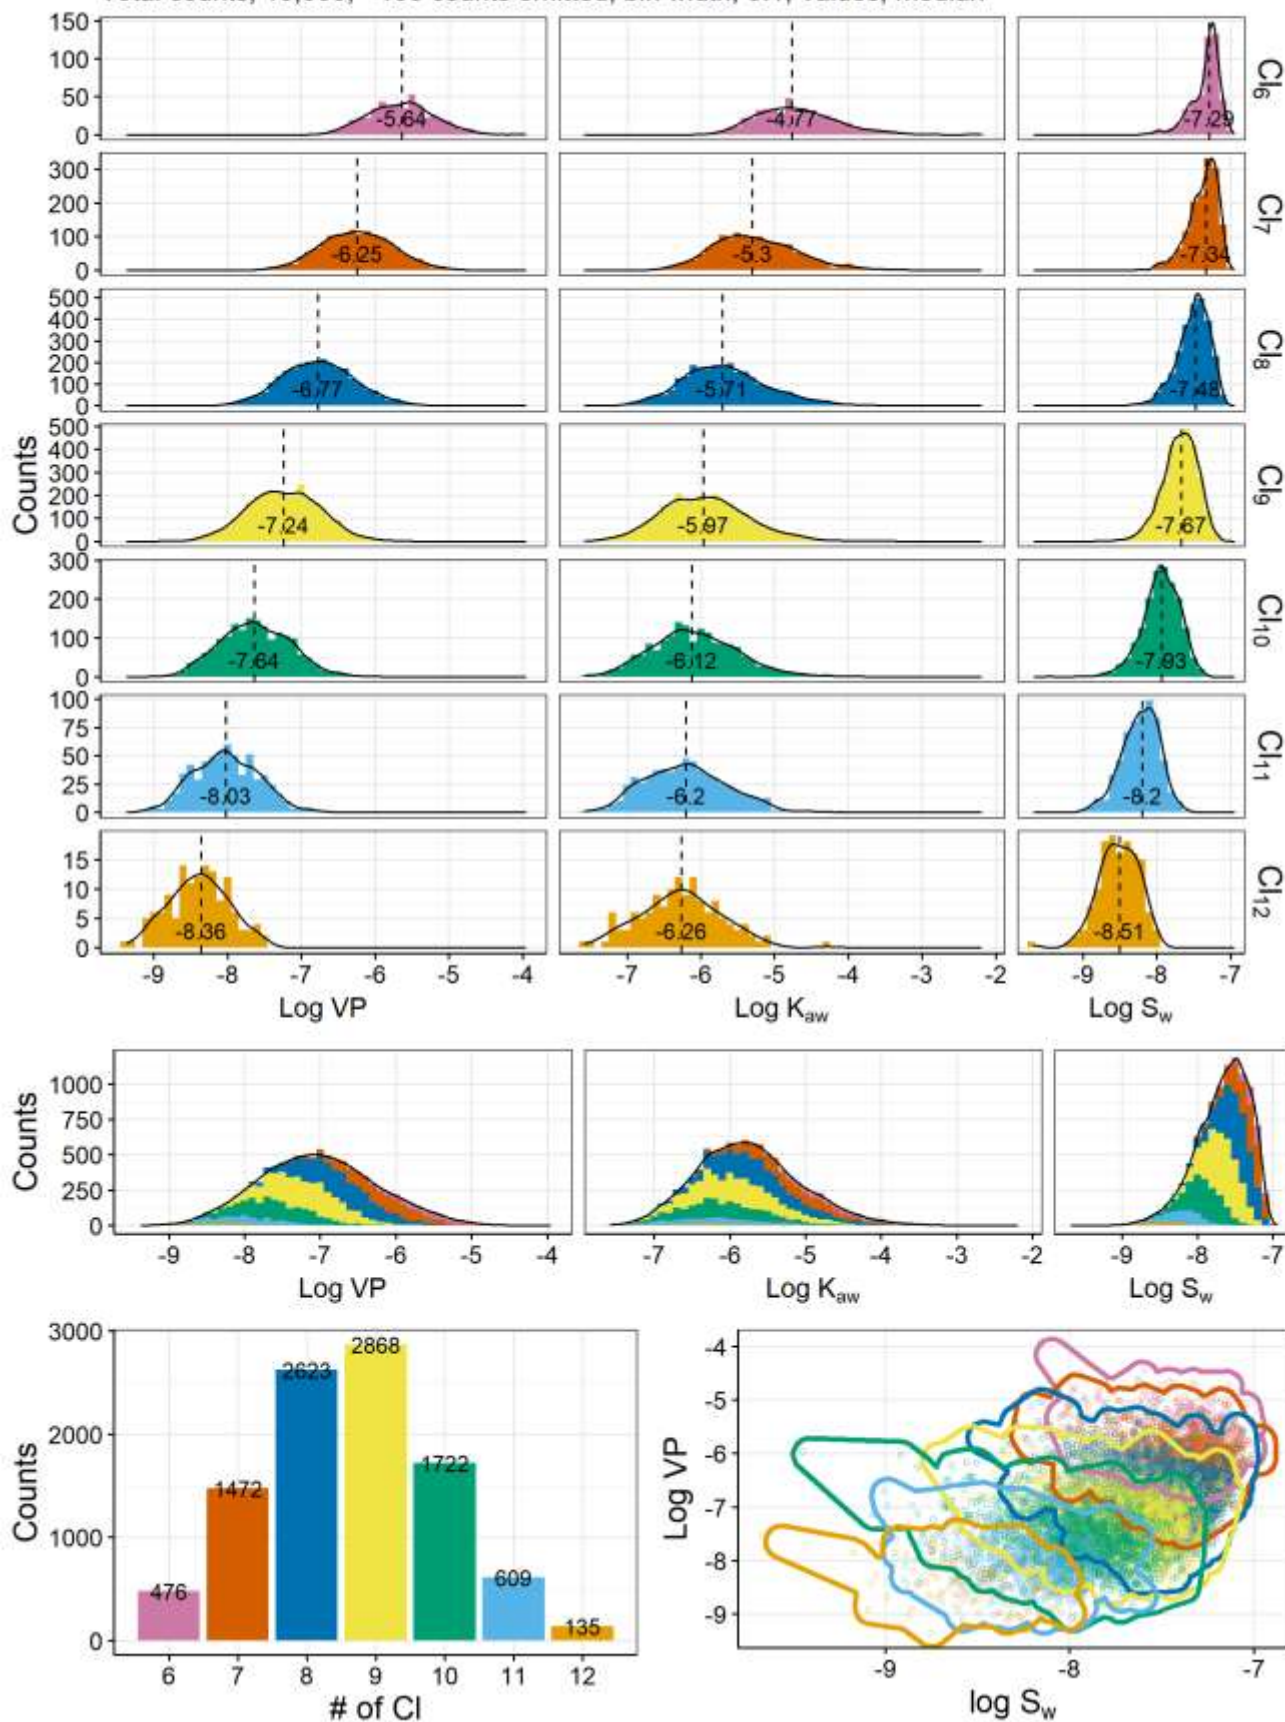

## C15, 70wt% CI

Total counts, 10,000; <100 counts omitted; bin width, 0.1; values, median

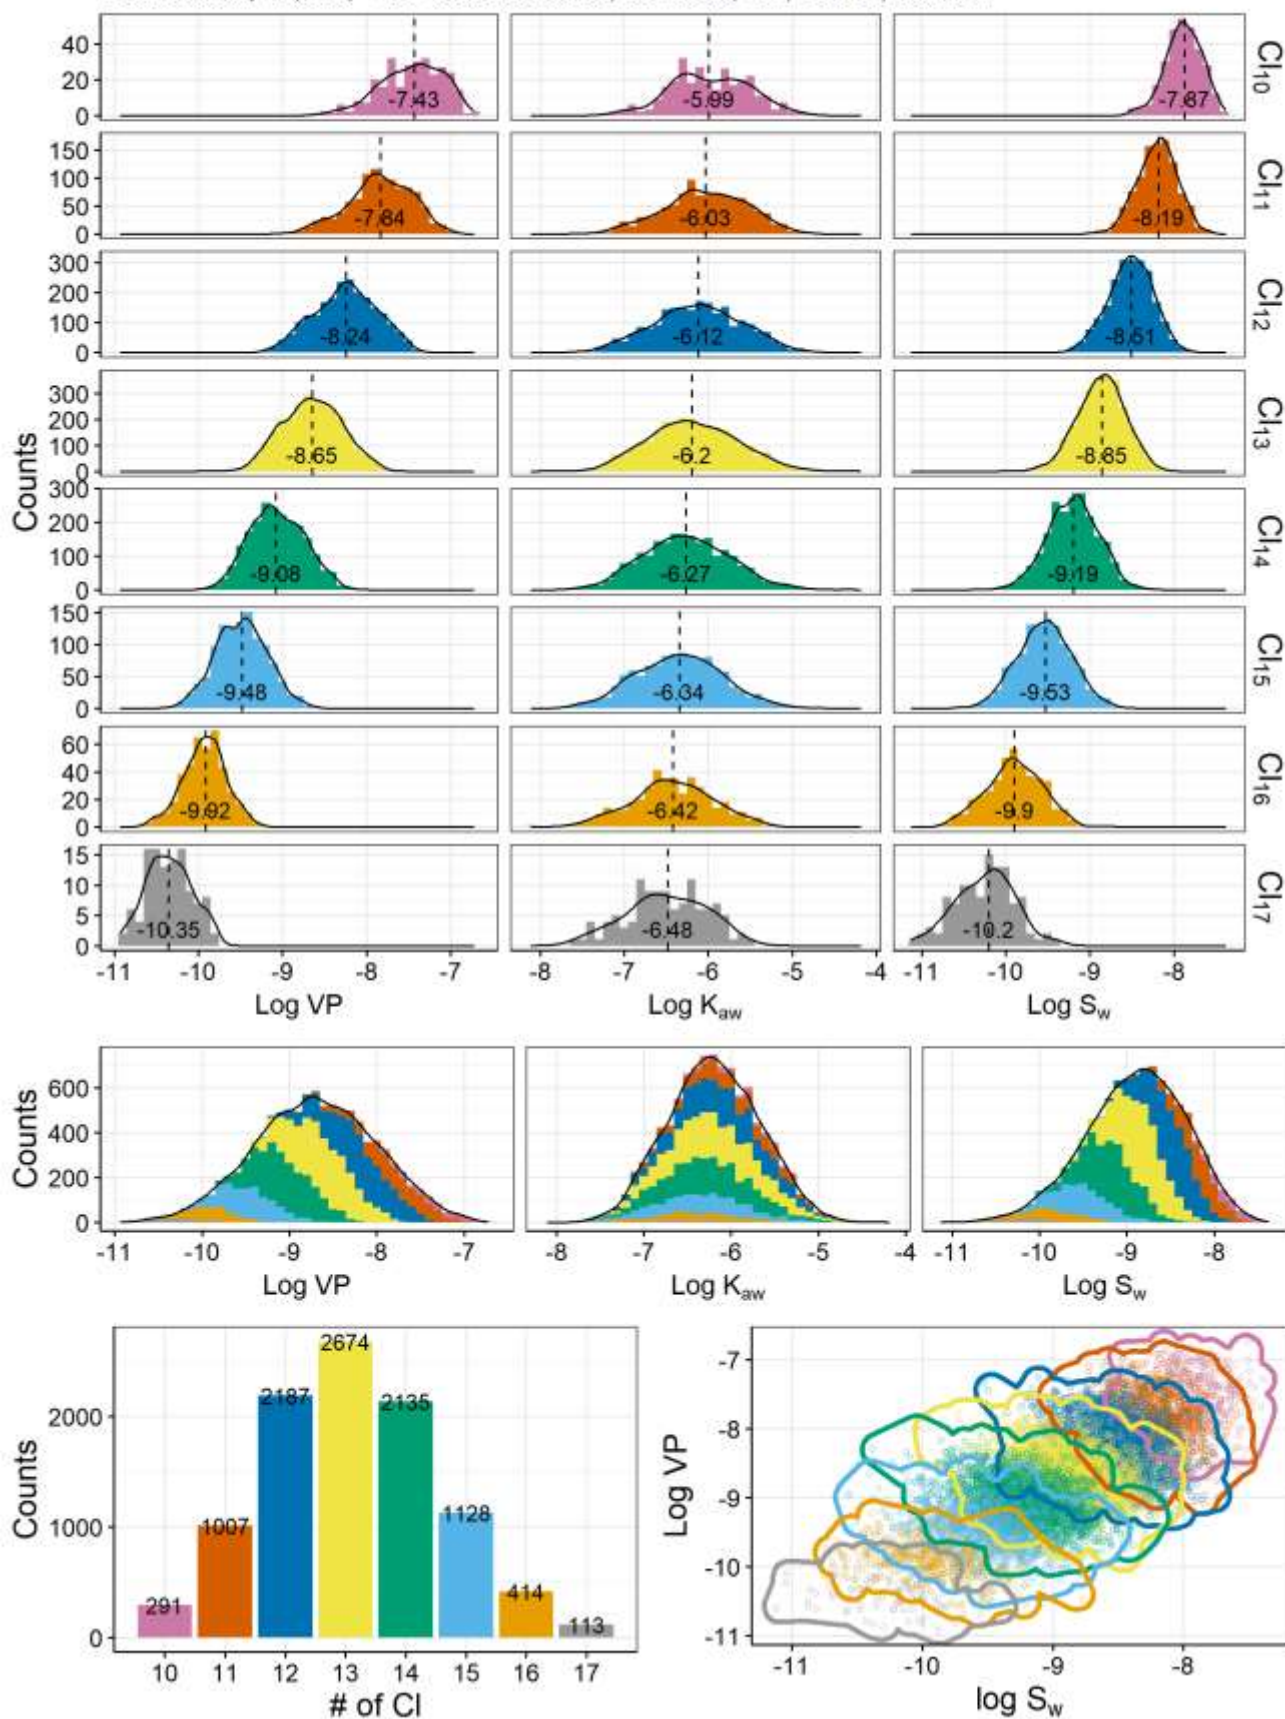

# C16, 30wt% CI

Total counts, 10,000; <100 counts omitted; bin width, 0.1; values, median

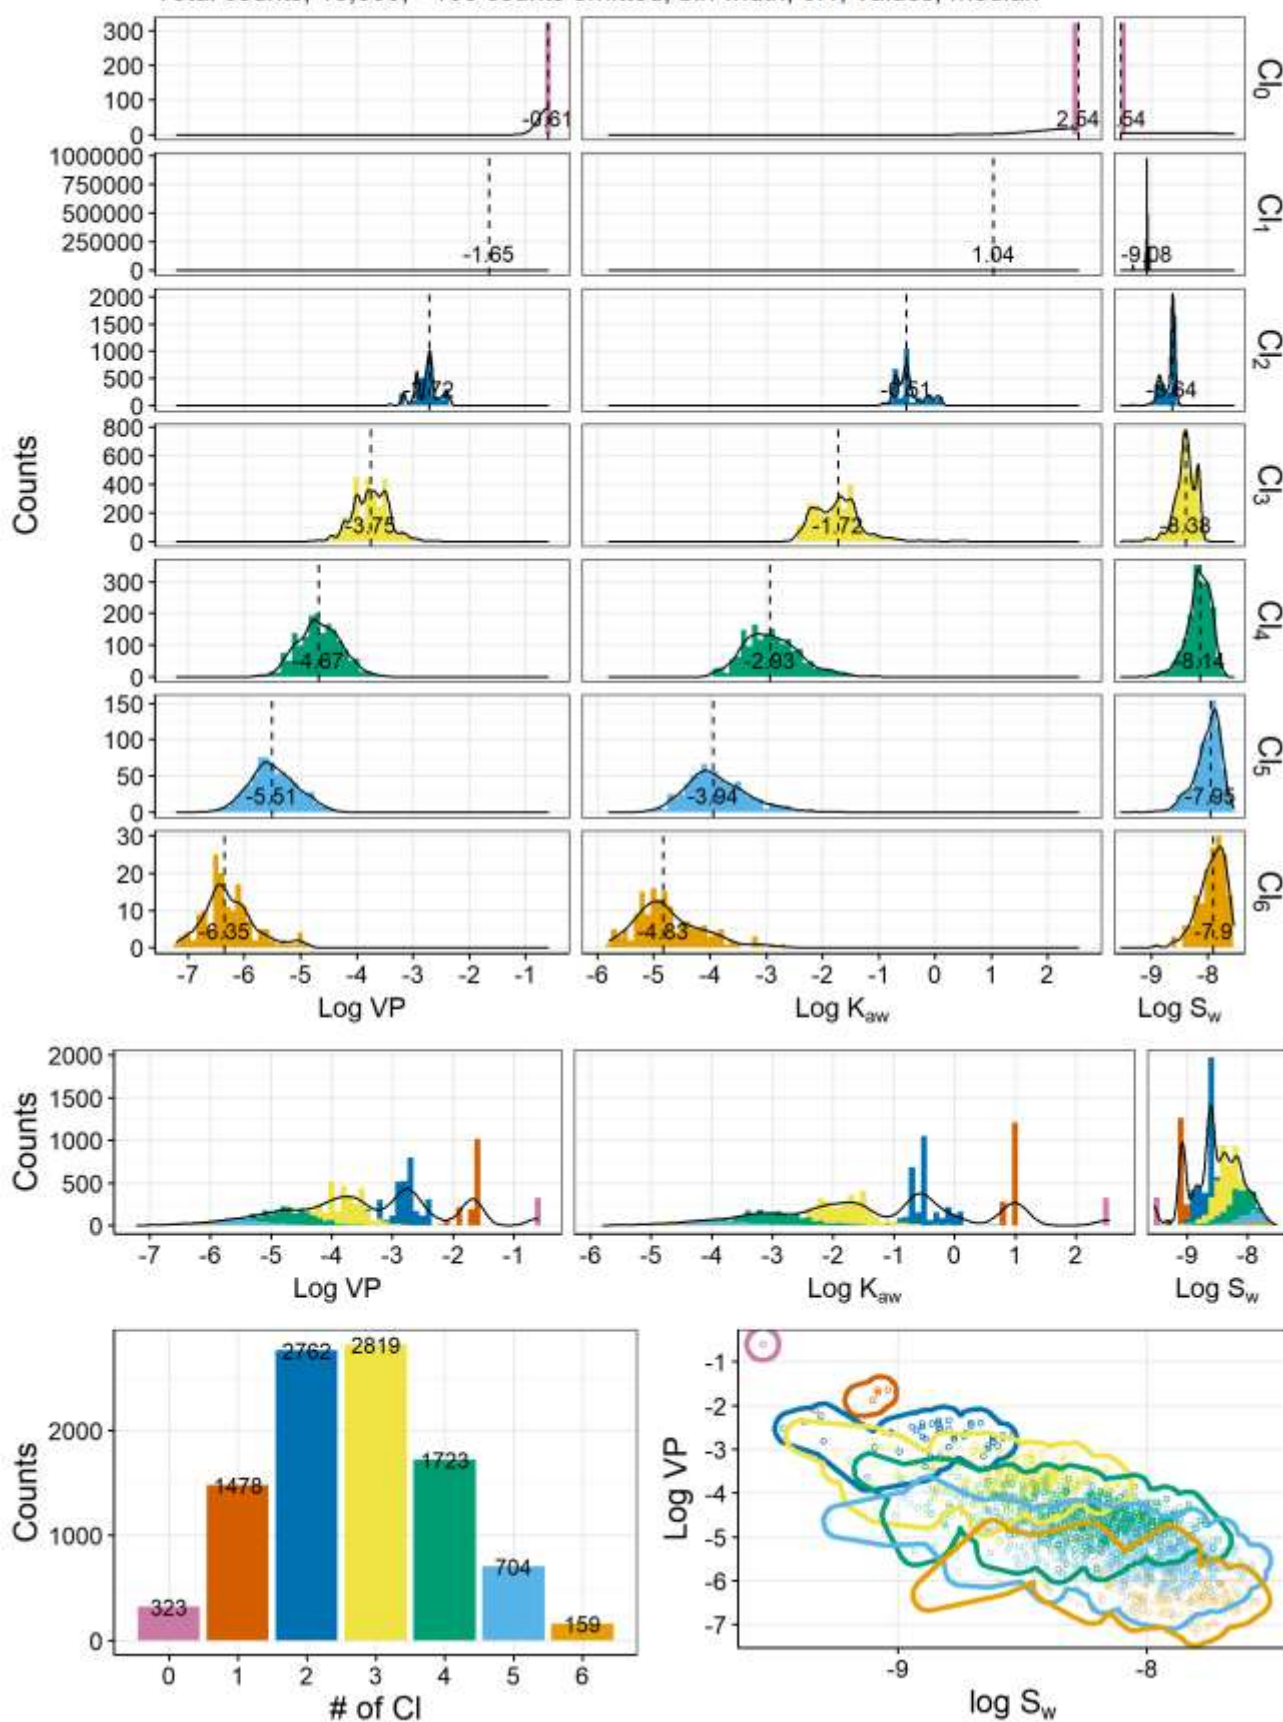



## C16, 40wt% CI

Total counts, 10,000; <100 counts omitted; bin width, 0.1; values, median

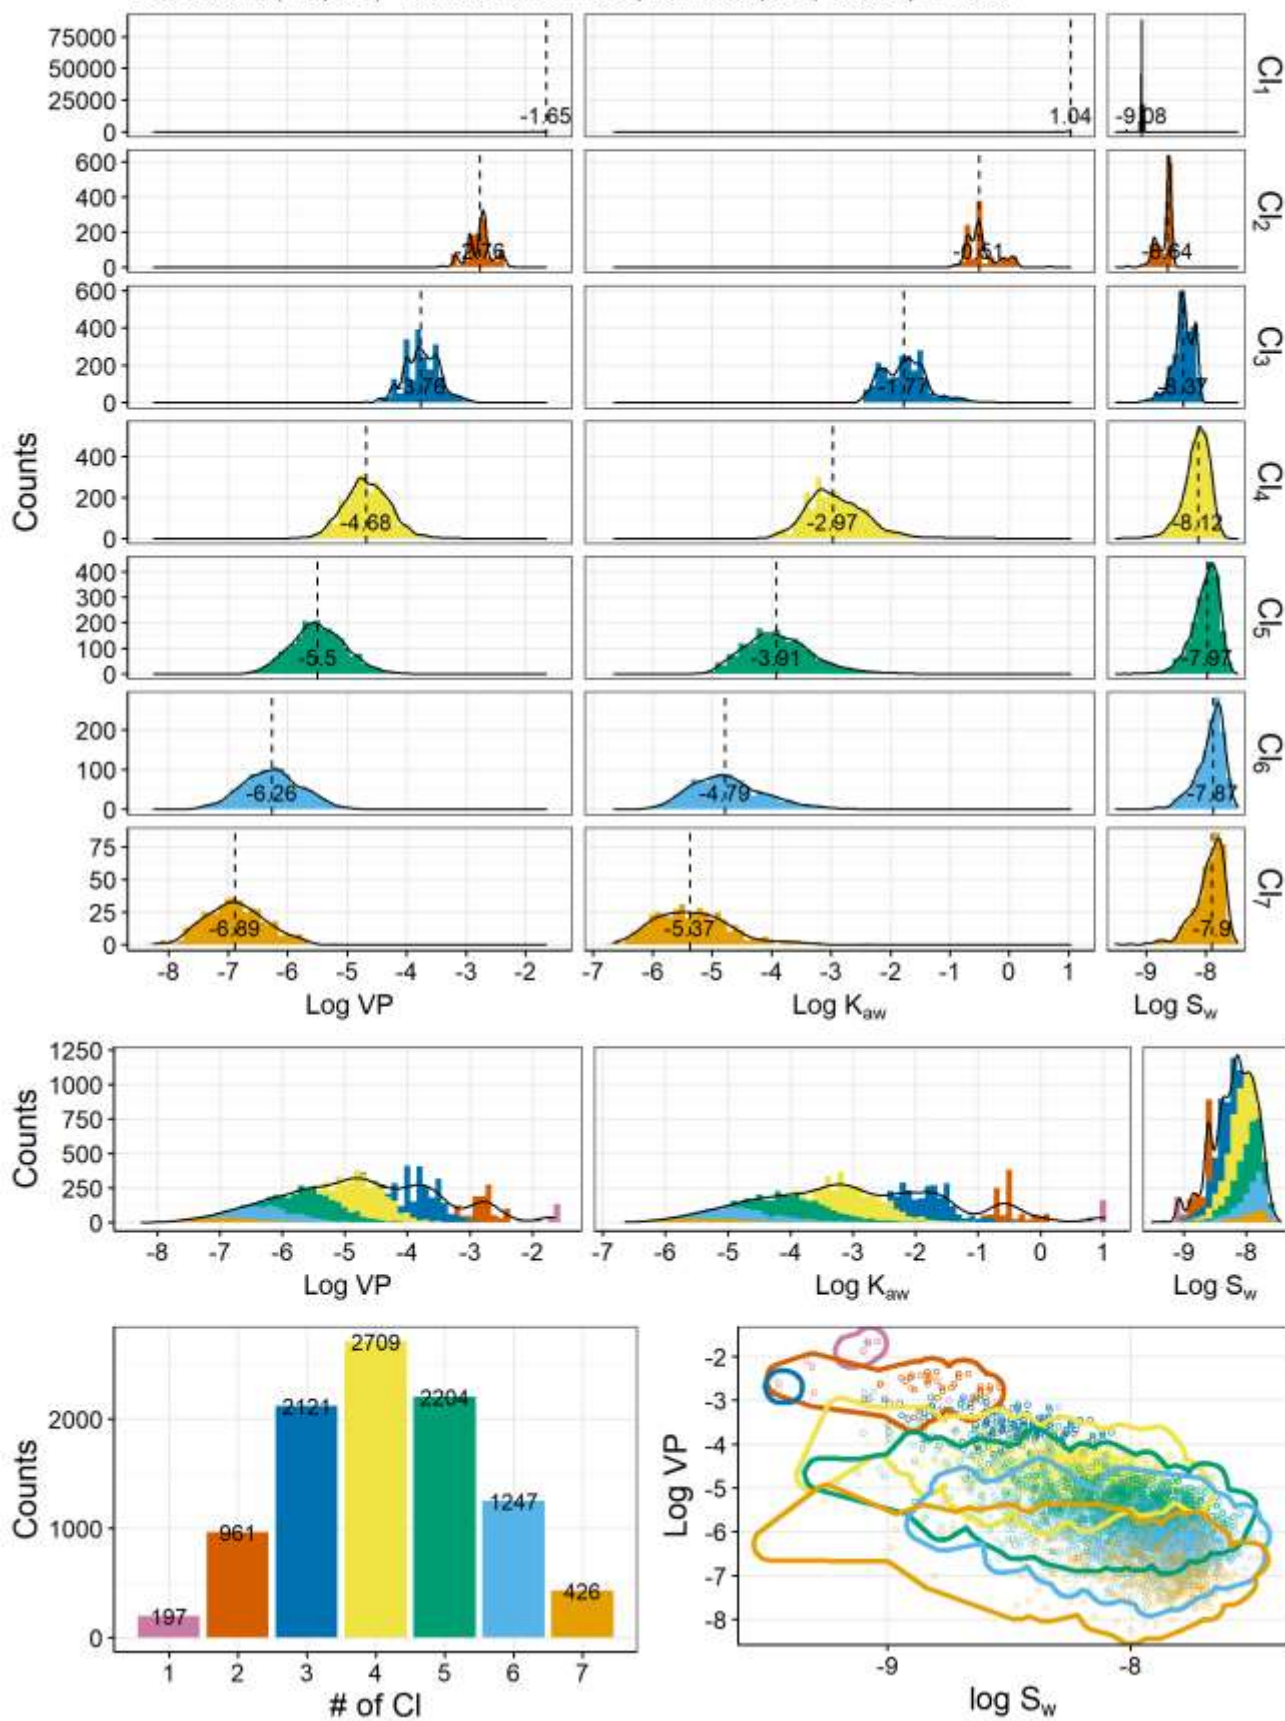

## C16, 50wt% CI

Total counts, 10,000; <100 counts omitted; bin width, 0.1; values, median

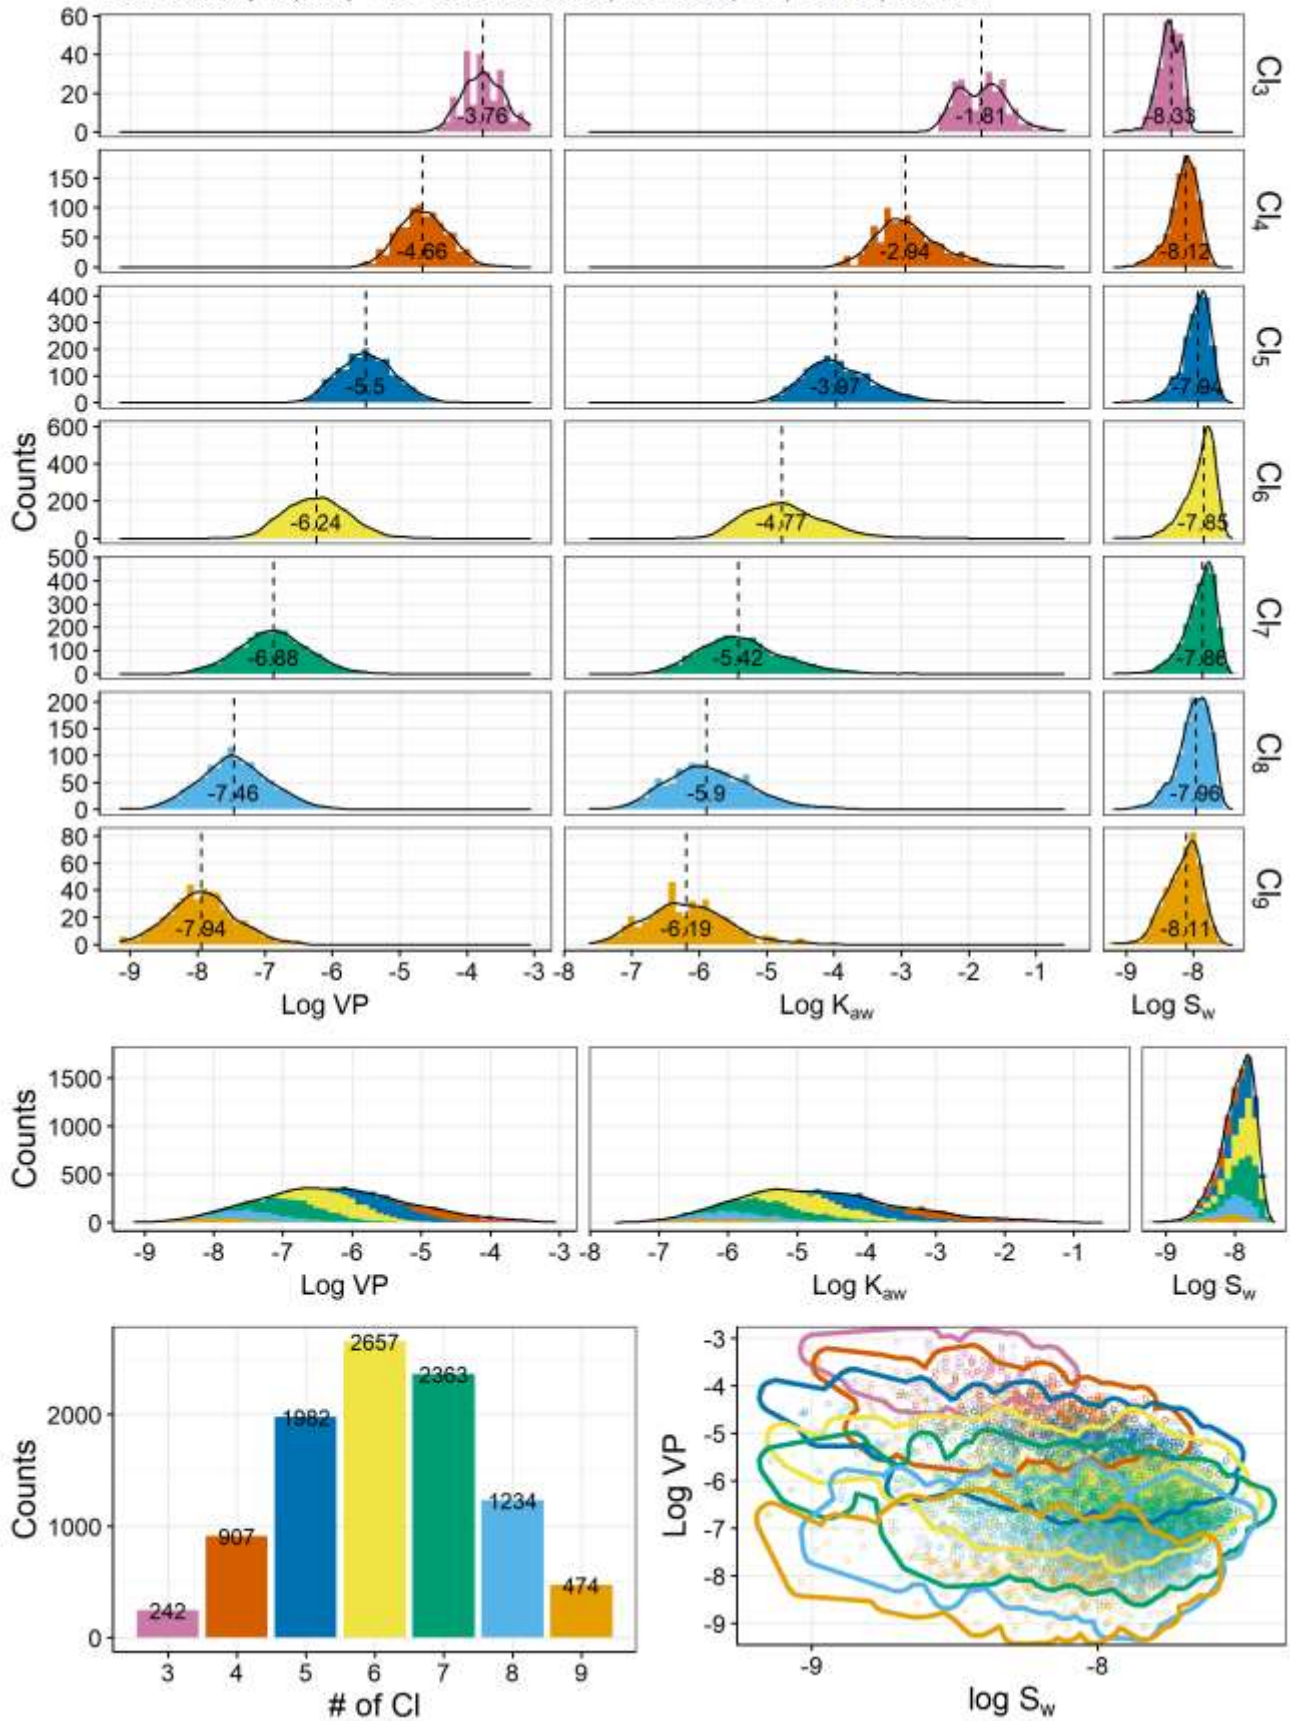

# C16, 60wt% CI

Total counts, 10,000; <100 counts omitted; bin width, 0.1; values, median

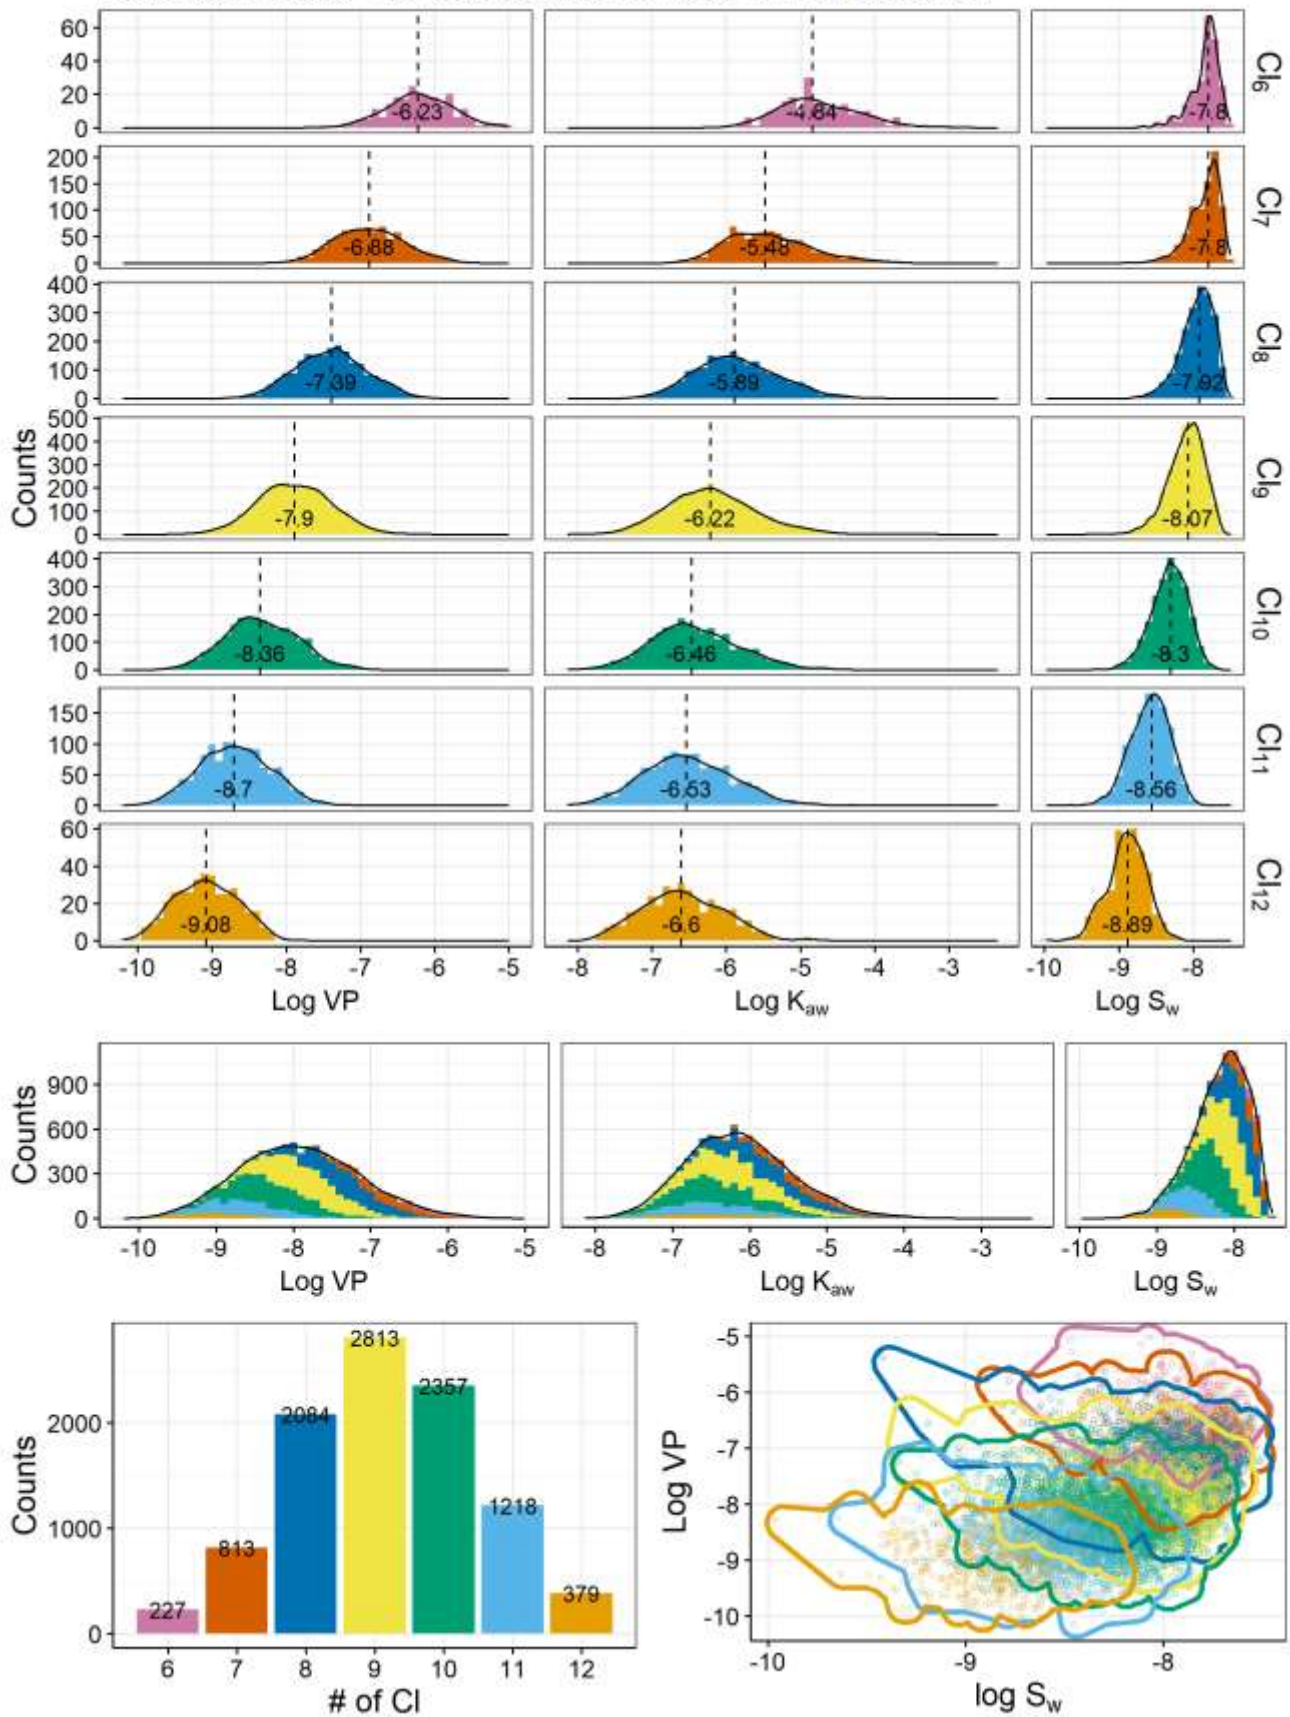



## C16, 70wt% CI

Total counts, 10,000; <100 counts omitted; bin width, 0.1; values, median

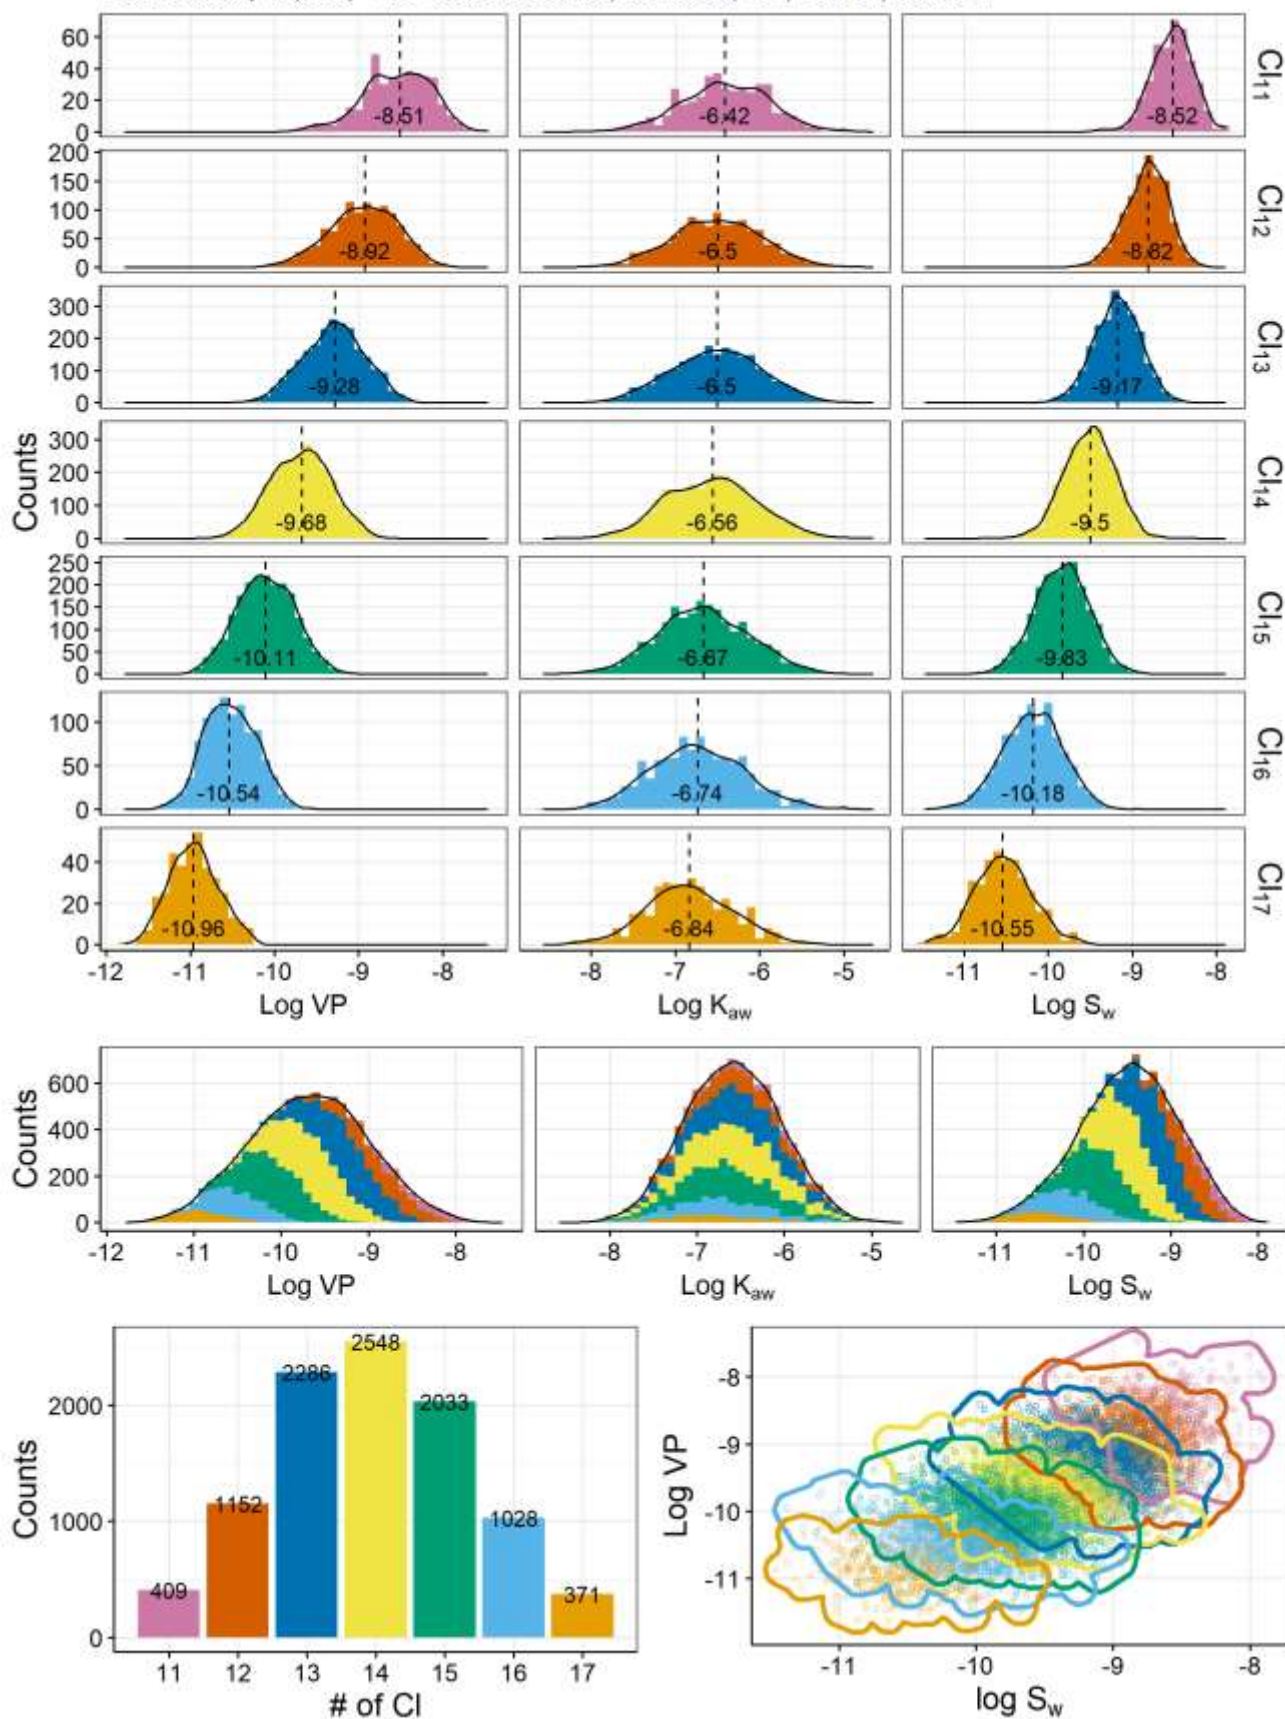

## C17, 30wt% CI

Total counts, 10,000; <100 counts omitted; bin width, 0.1; values, median

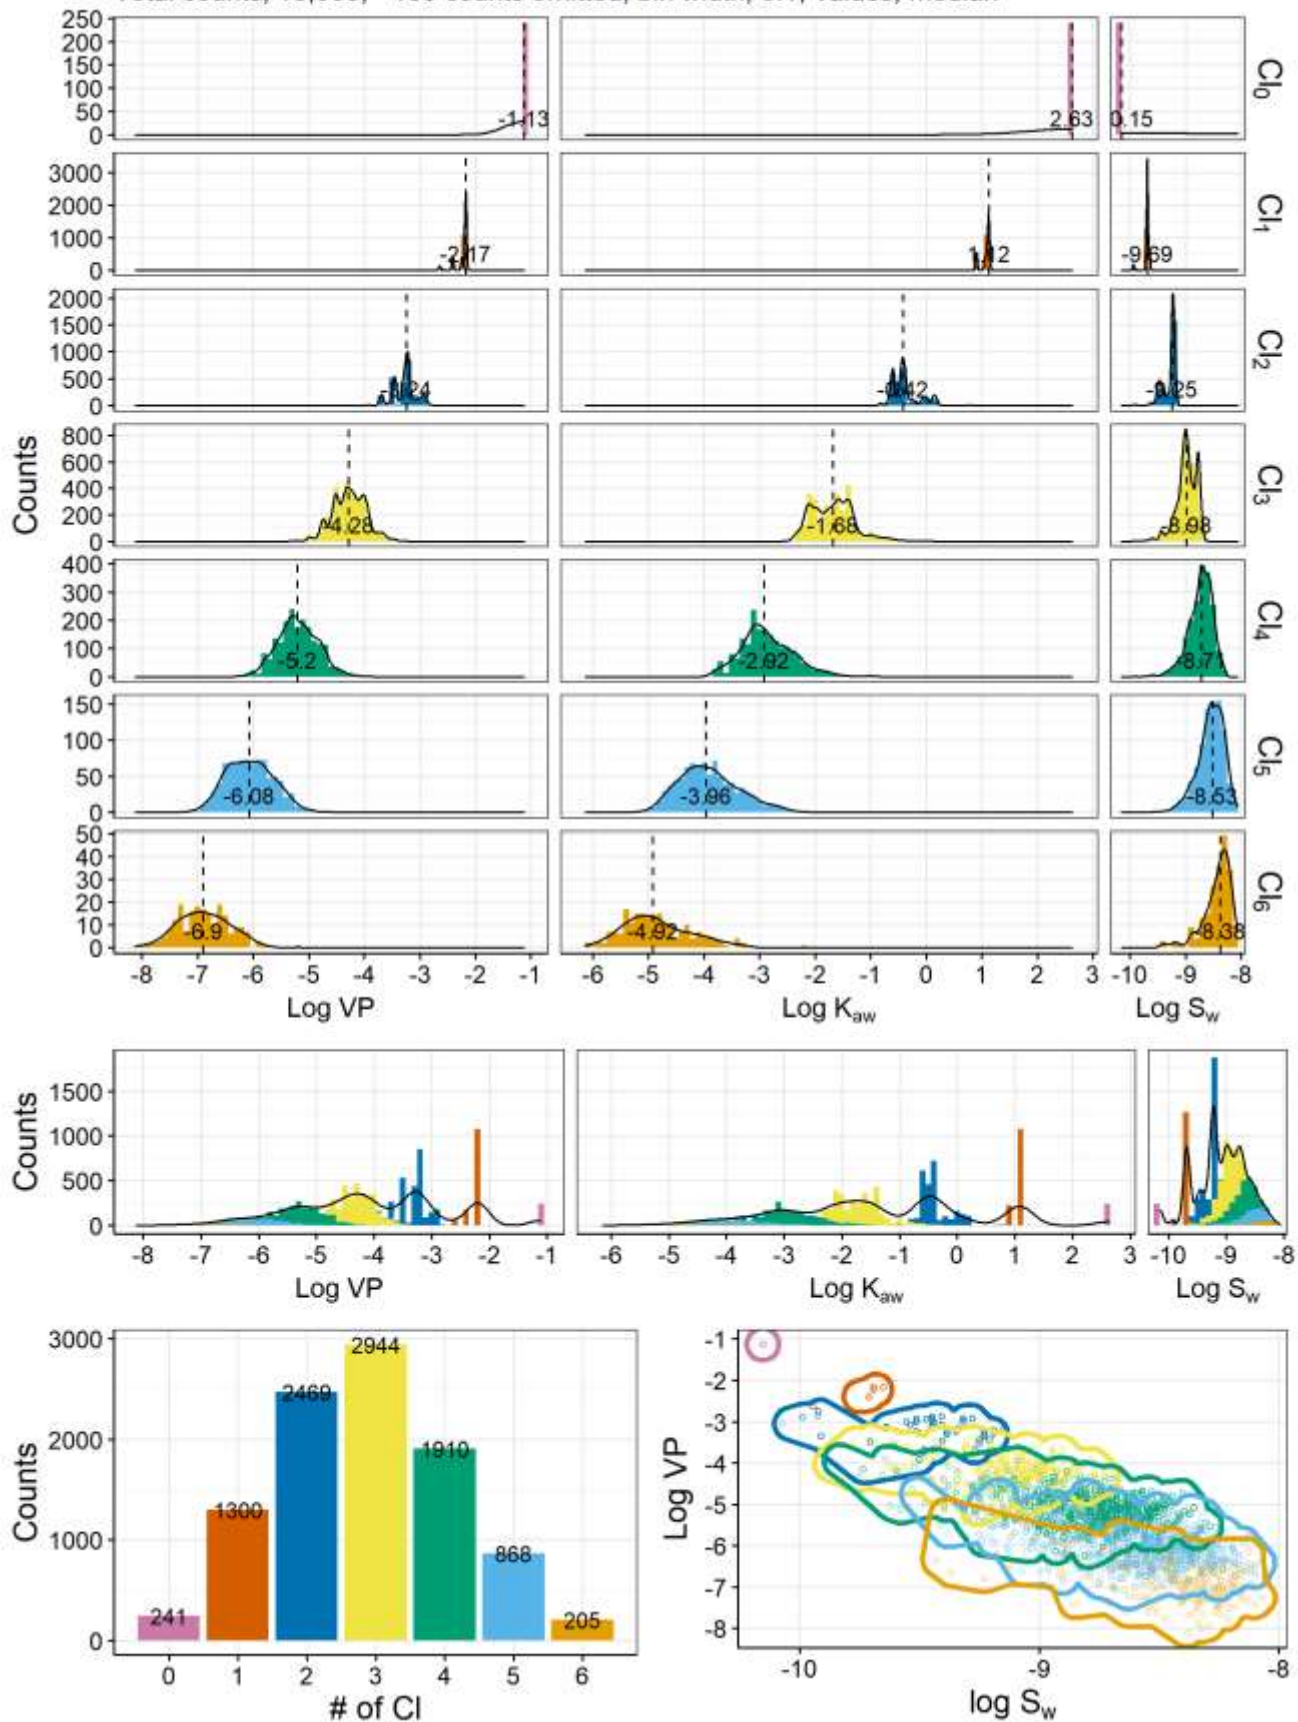

# C17, 40wt% CI

Total counts, 10,000; <100 counts omitted; bin width, 0.1; values, median

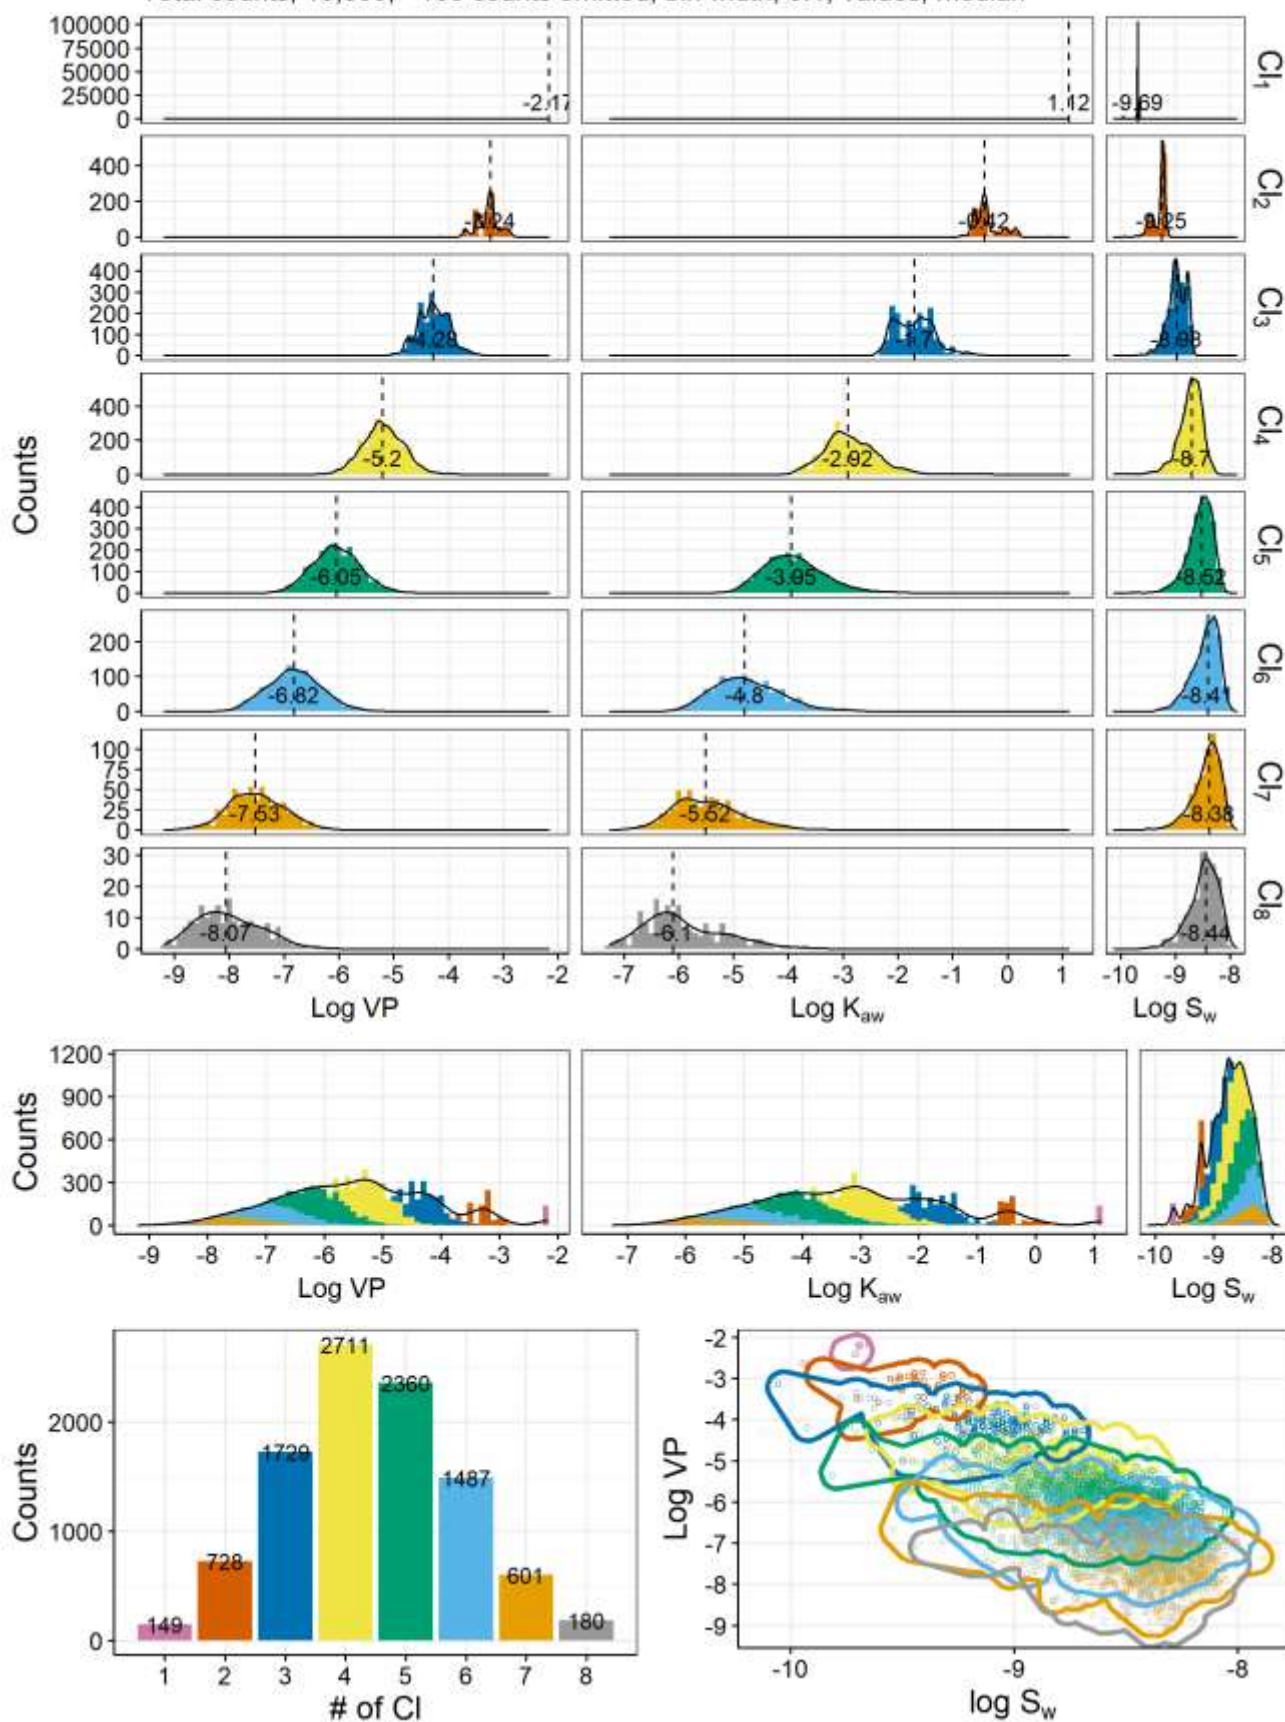



# C17, 50wt% CI

Total counts, 10,000; <100 counts omitted; bin width, 0.1; values, median

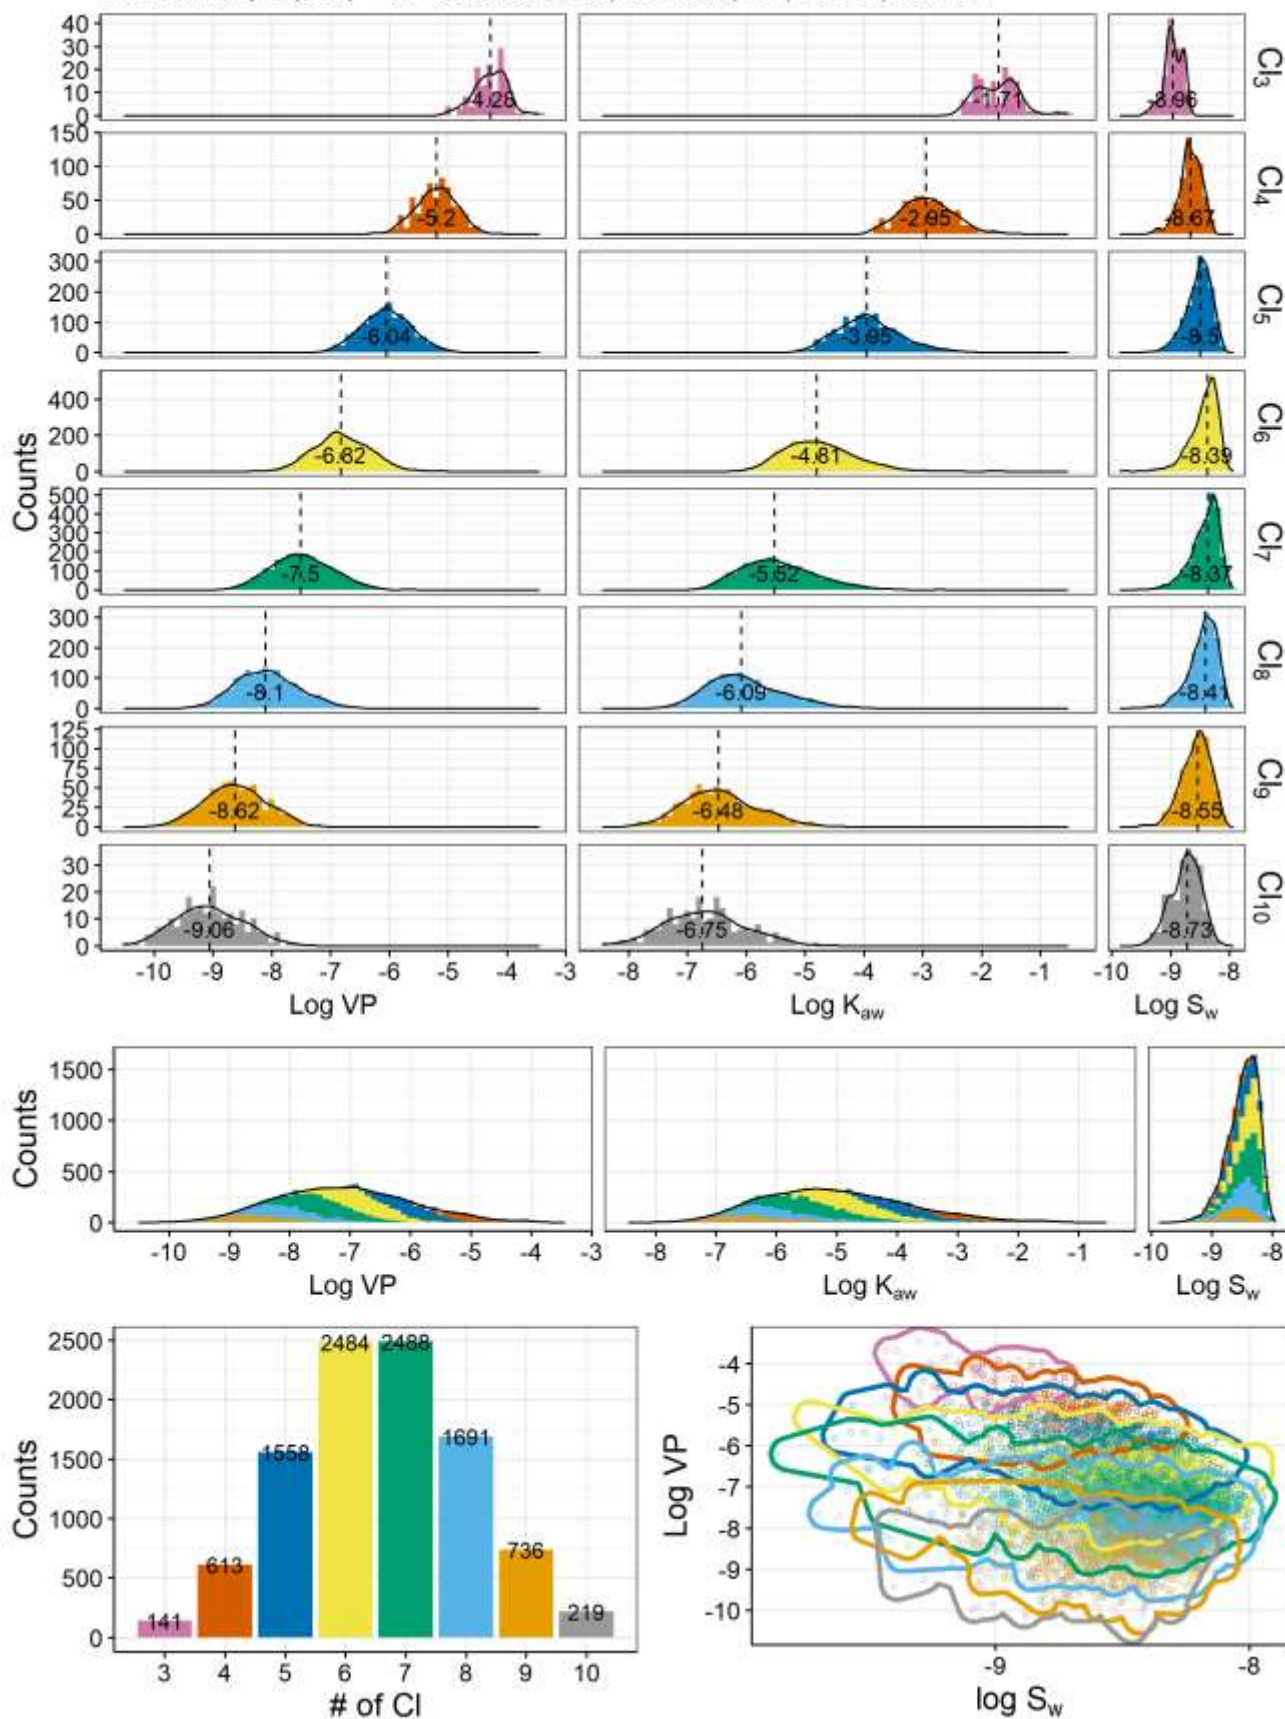

## C17, 60wt% CI

Total counts, 10,000; <100 counts omitted; bin width, 0.1; values, median

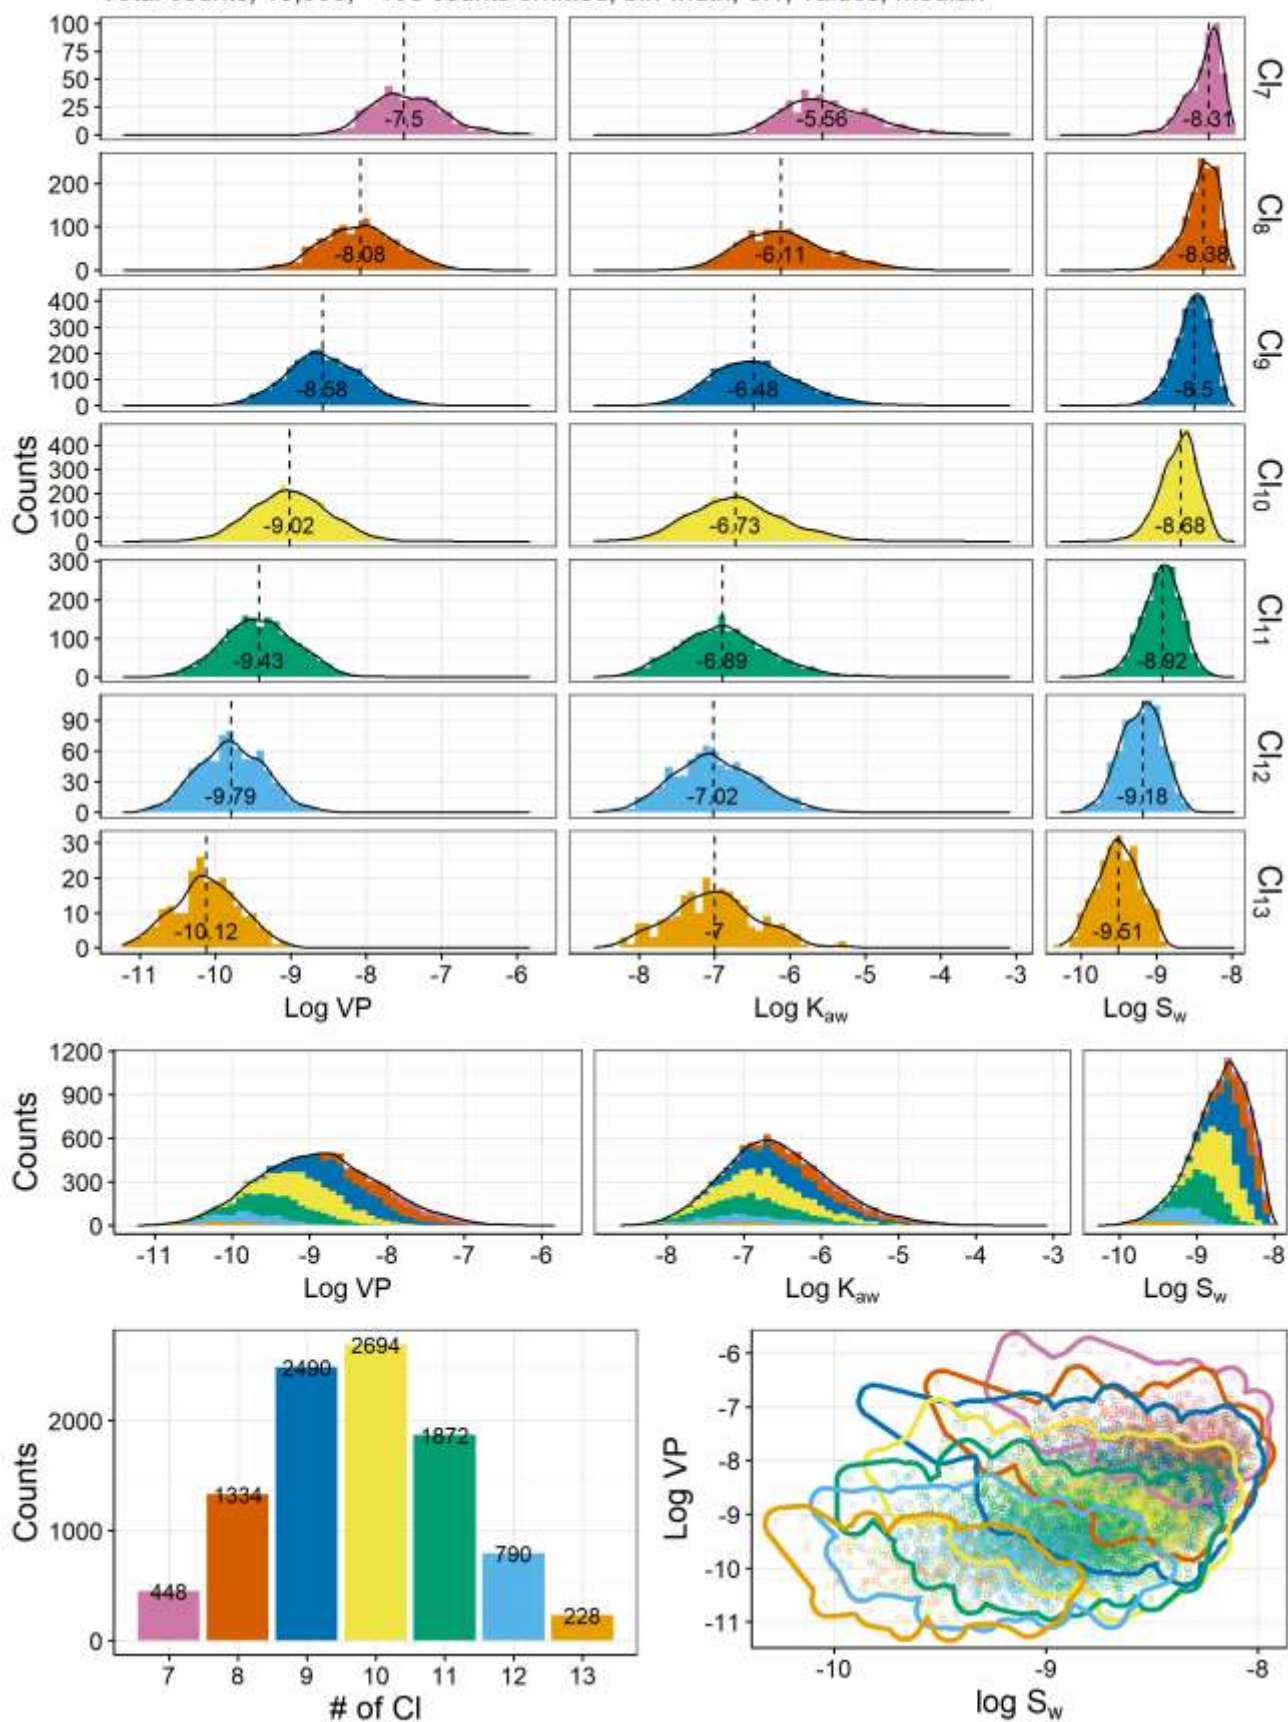

## C17, 70wt% CI

Total counts, 10,000; <100 counts omitted; bin width, 0.1; values, median

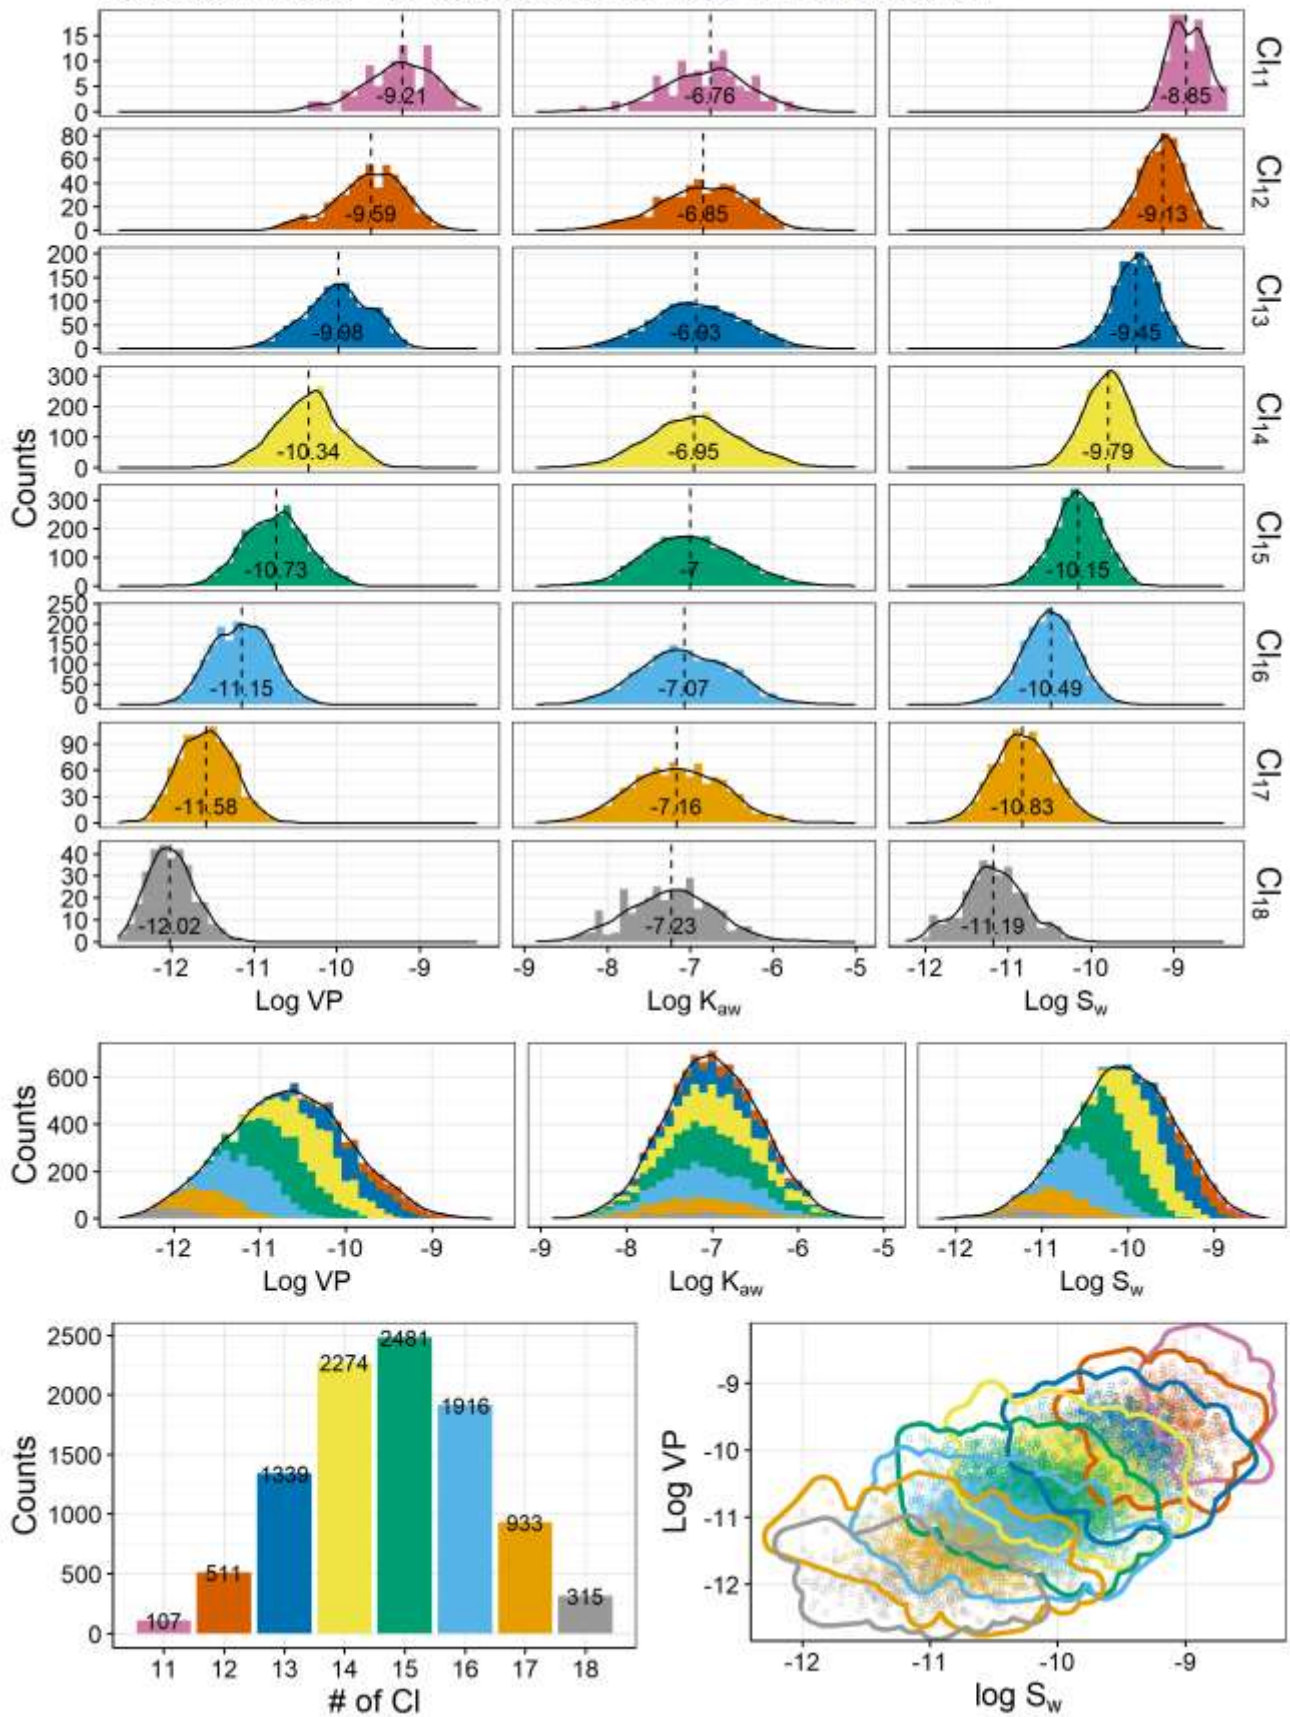



## C18, 30wt% CI

Total counts, 10,000; <100 counts omitted; bin width, 0.1; values, median

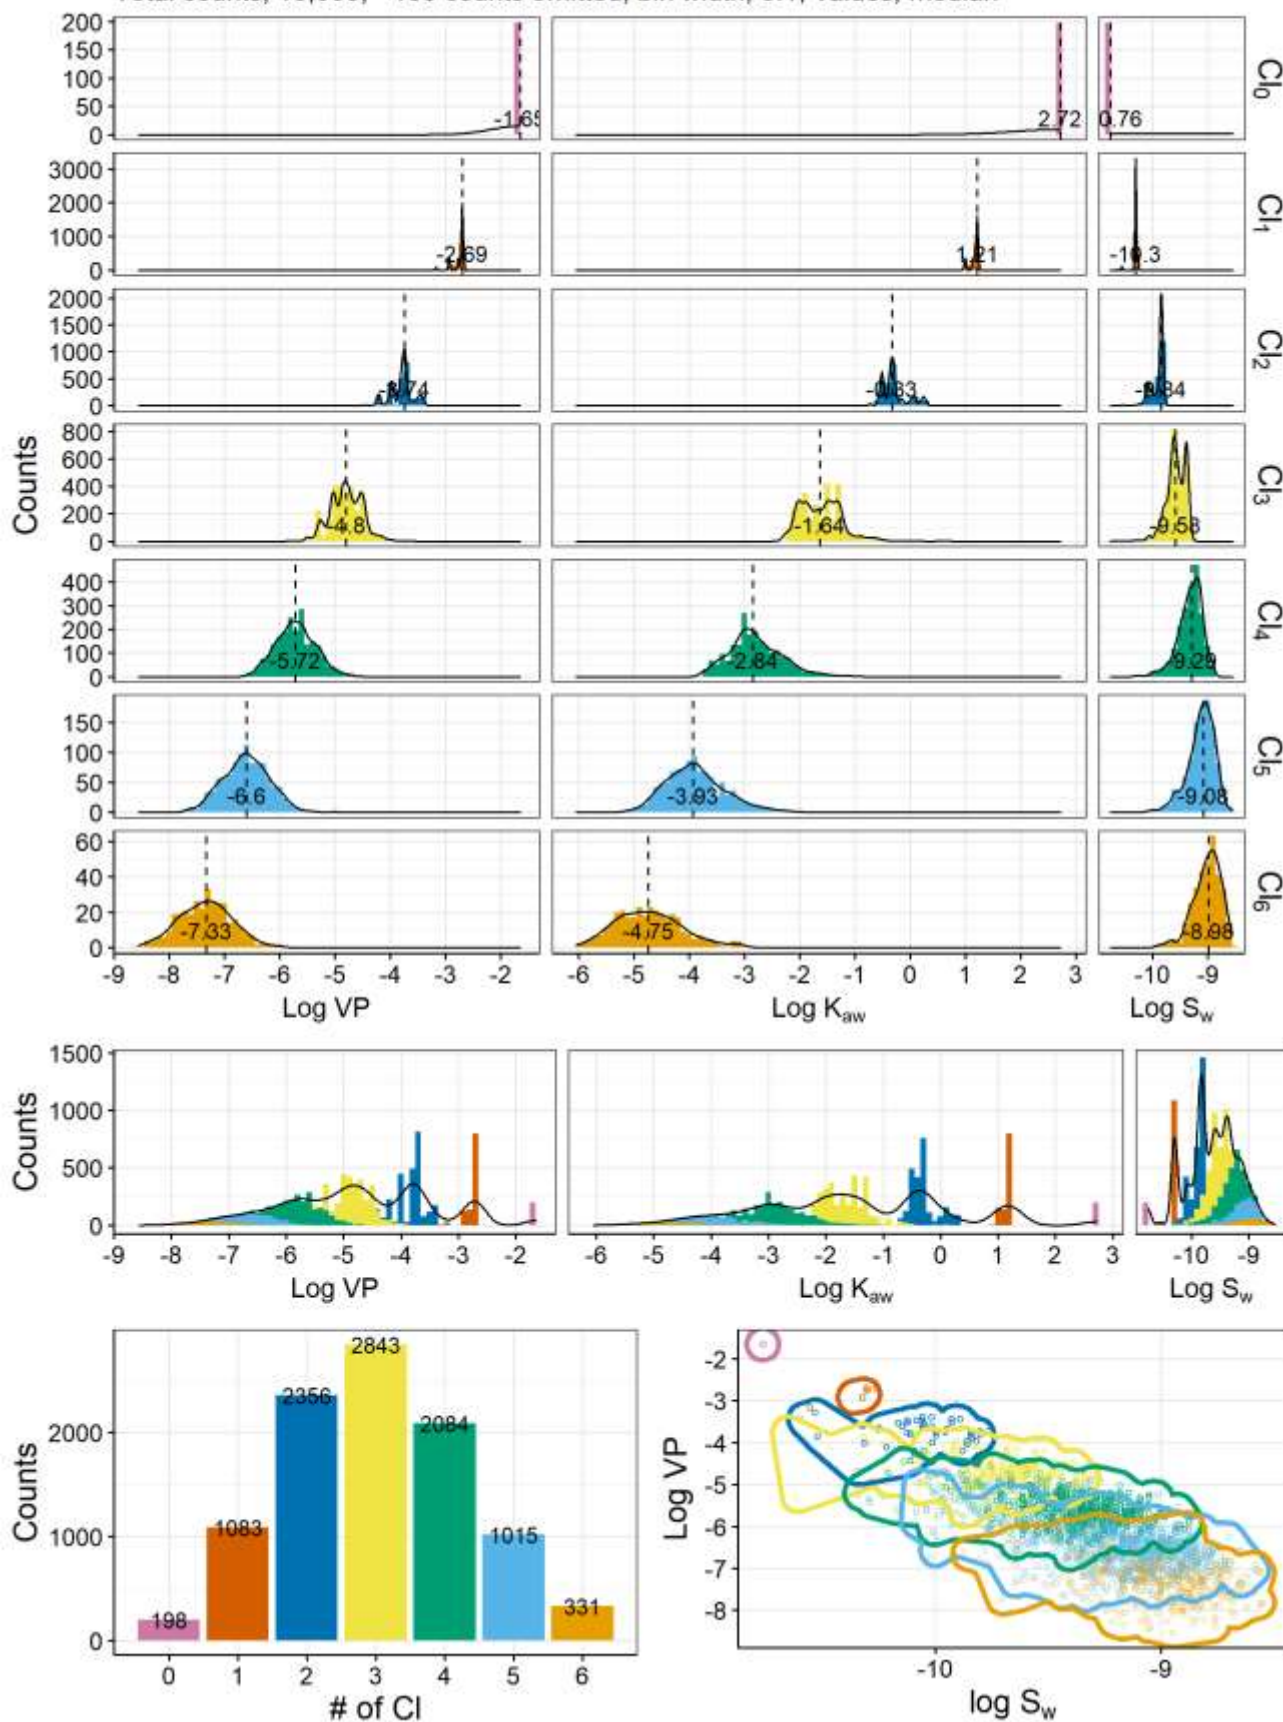

# C18, 40wt% CI

Total counts, 10,000; <100 counts omitted; bin width, 0.1; values, median

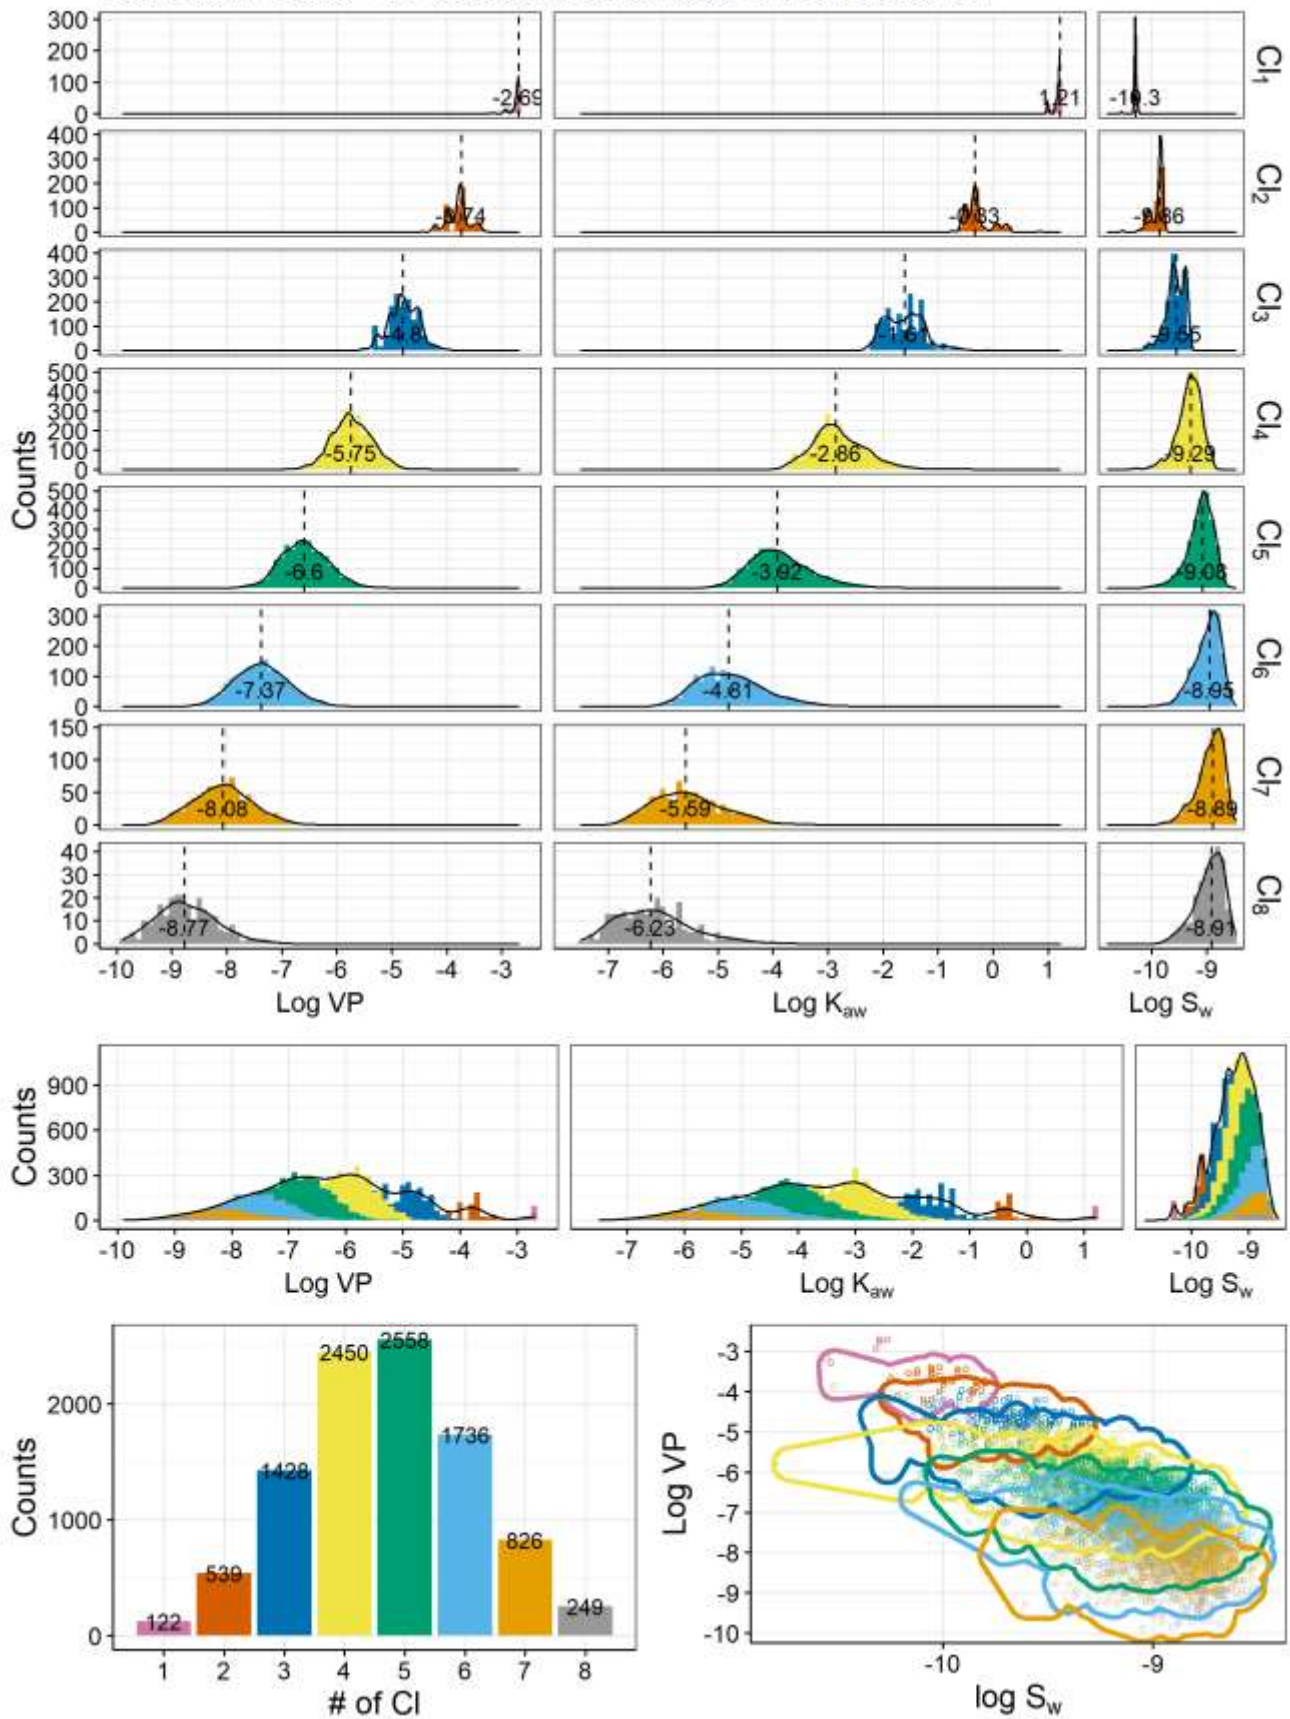

# C18, 50wt% CI

Total counts, 10,000; <100 counts omitted; bin width, 0.1; values, median

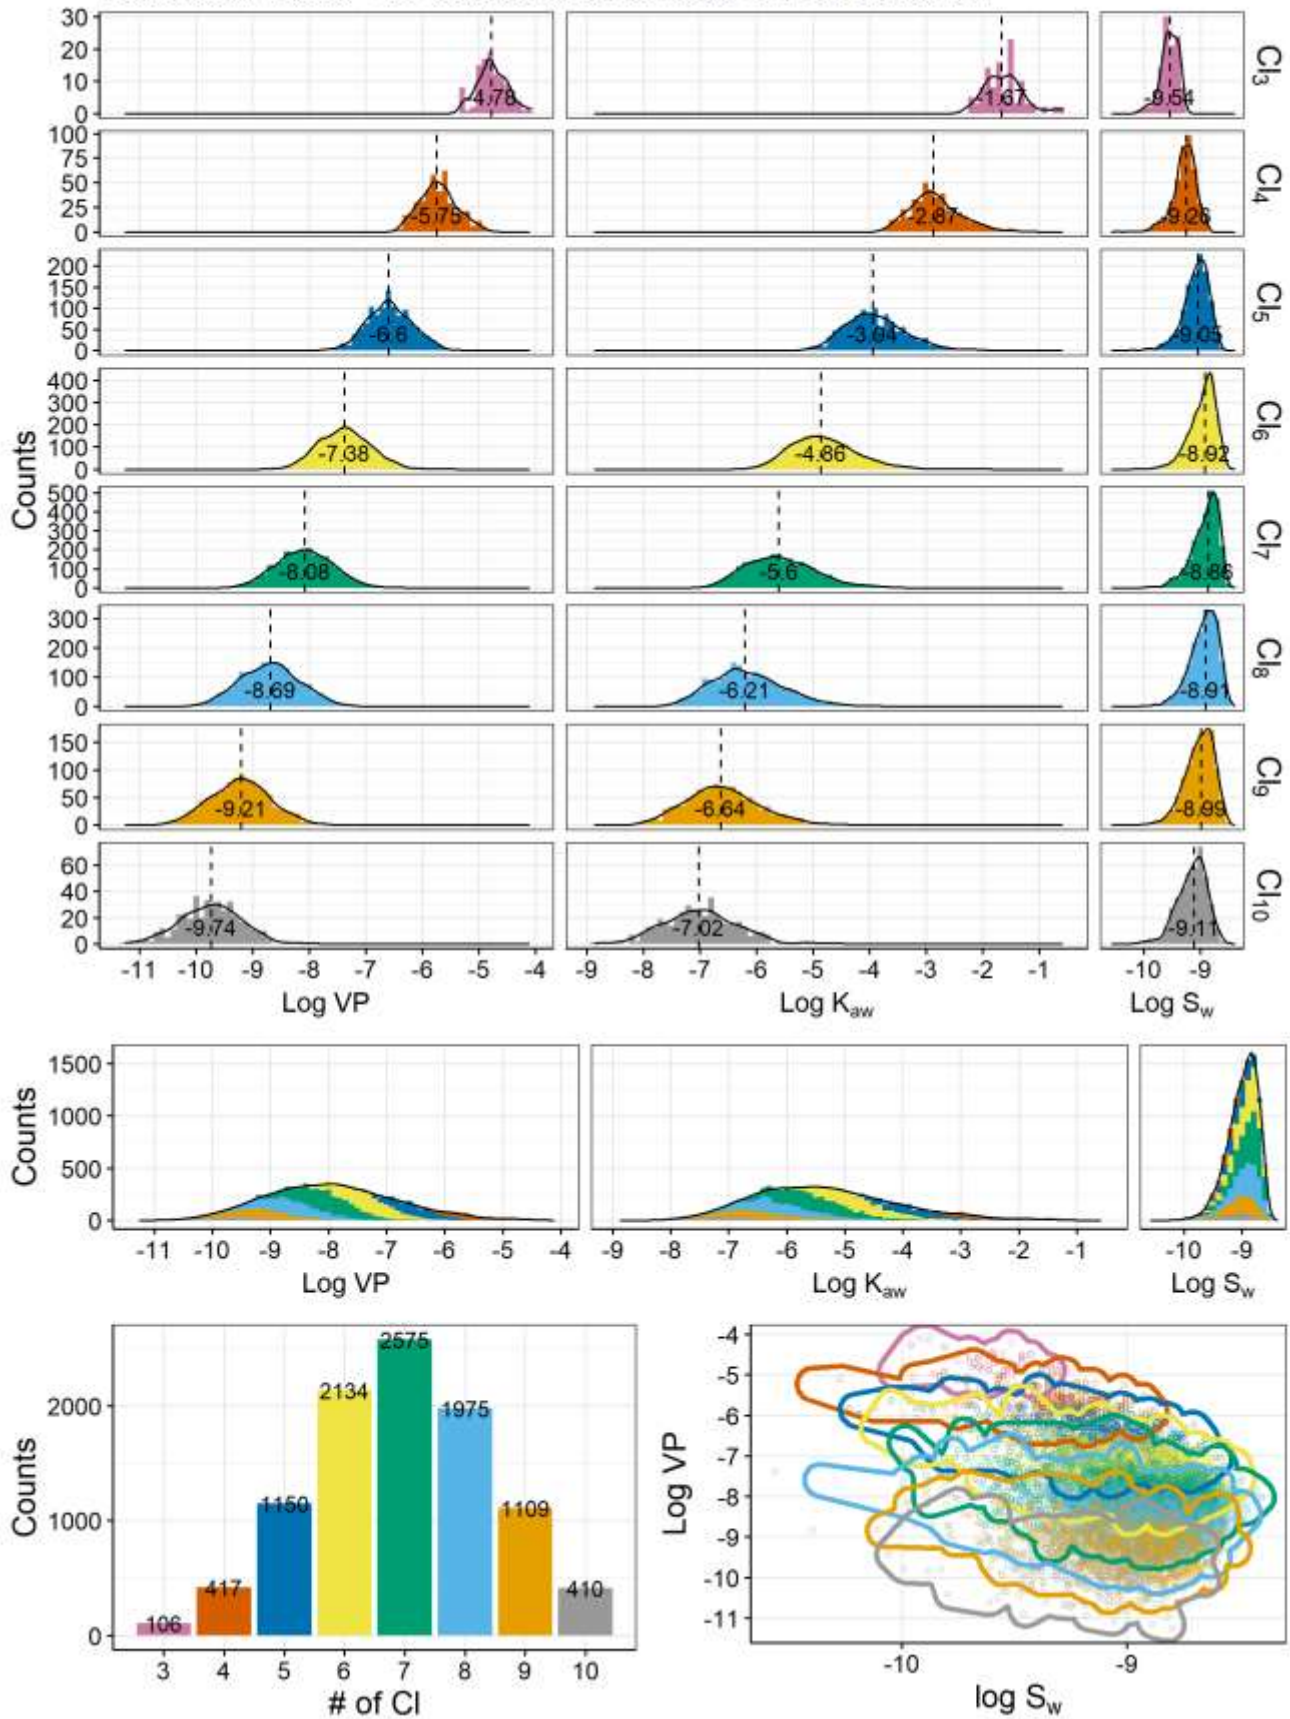



# C18, 60wt% CI

Total counts, 10,000; <100 counts omitted; bin width, 0.1; values, median

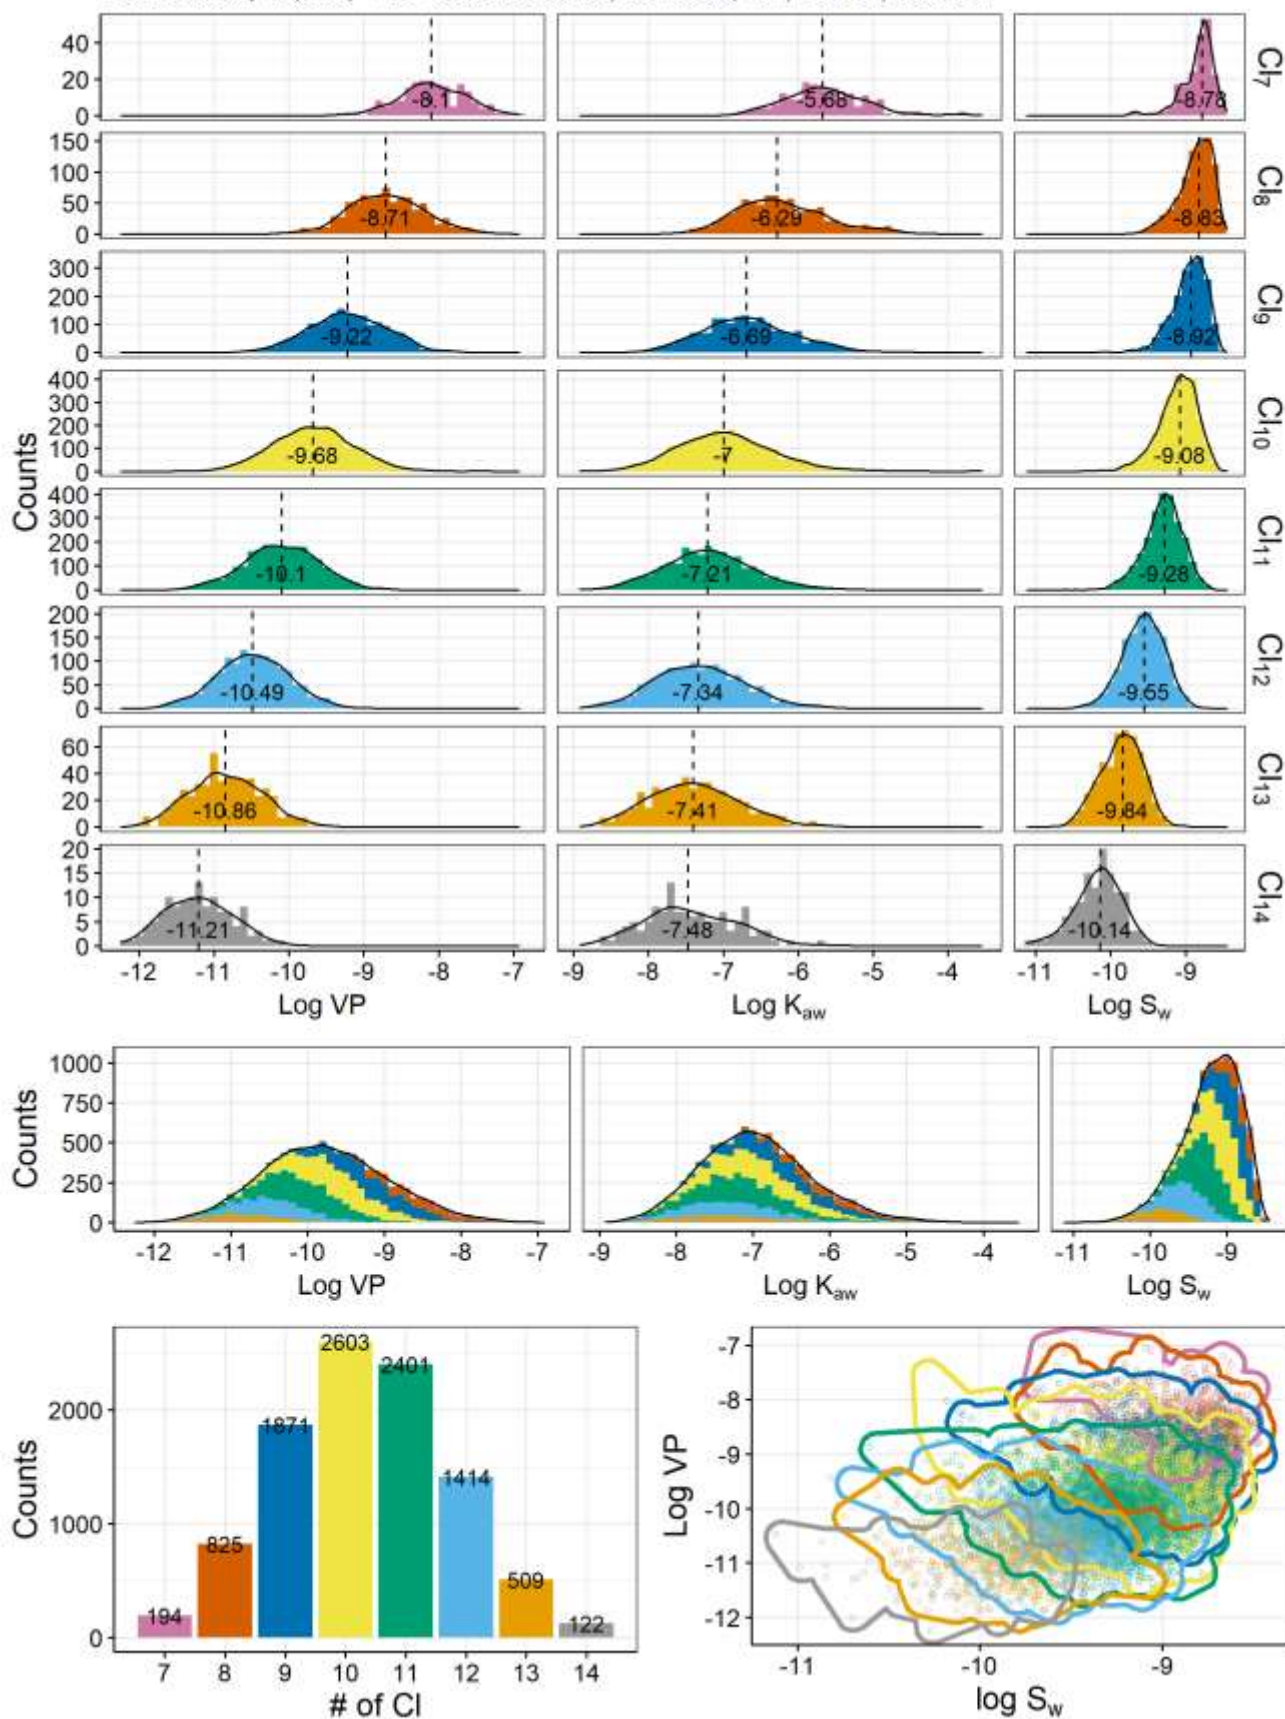

## C18, 70wt% CI

Total counts, 10,000; <100 counts omitted; bin width, 0.1; values, median

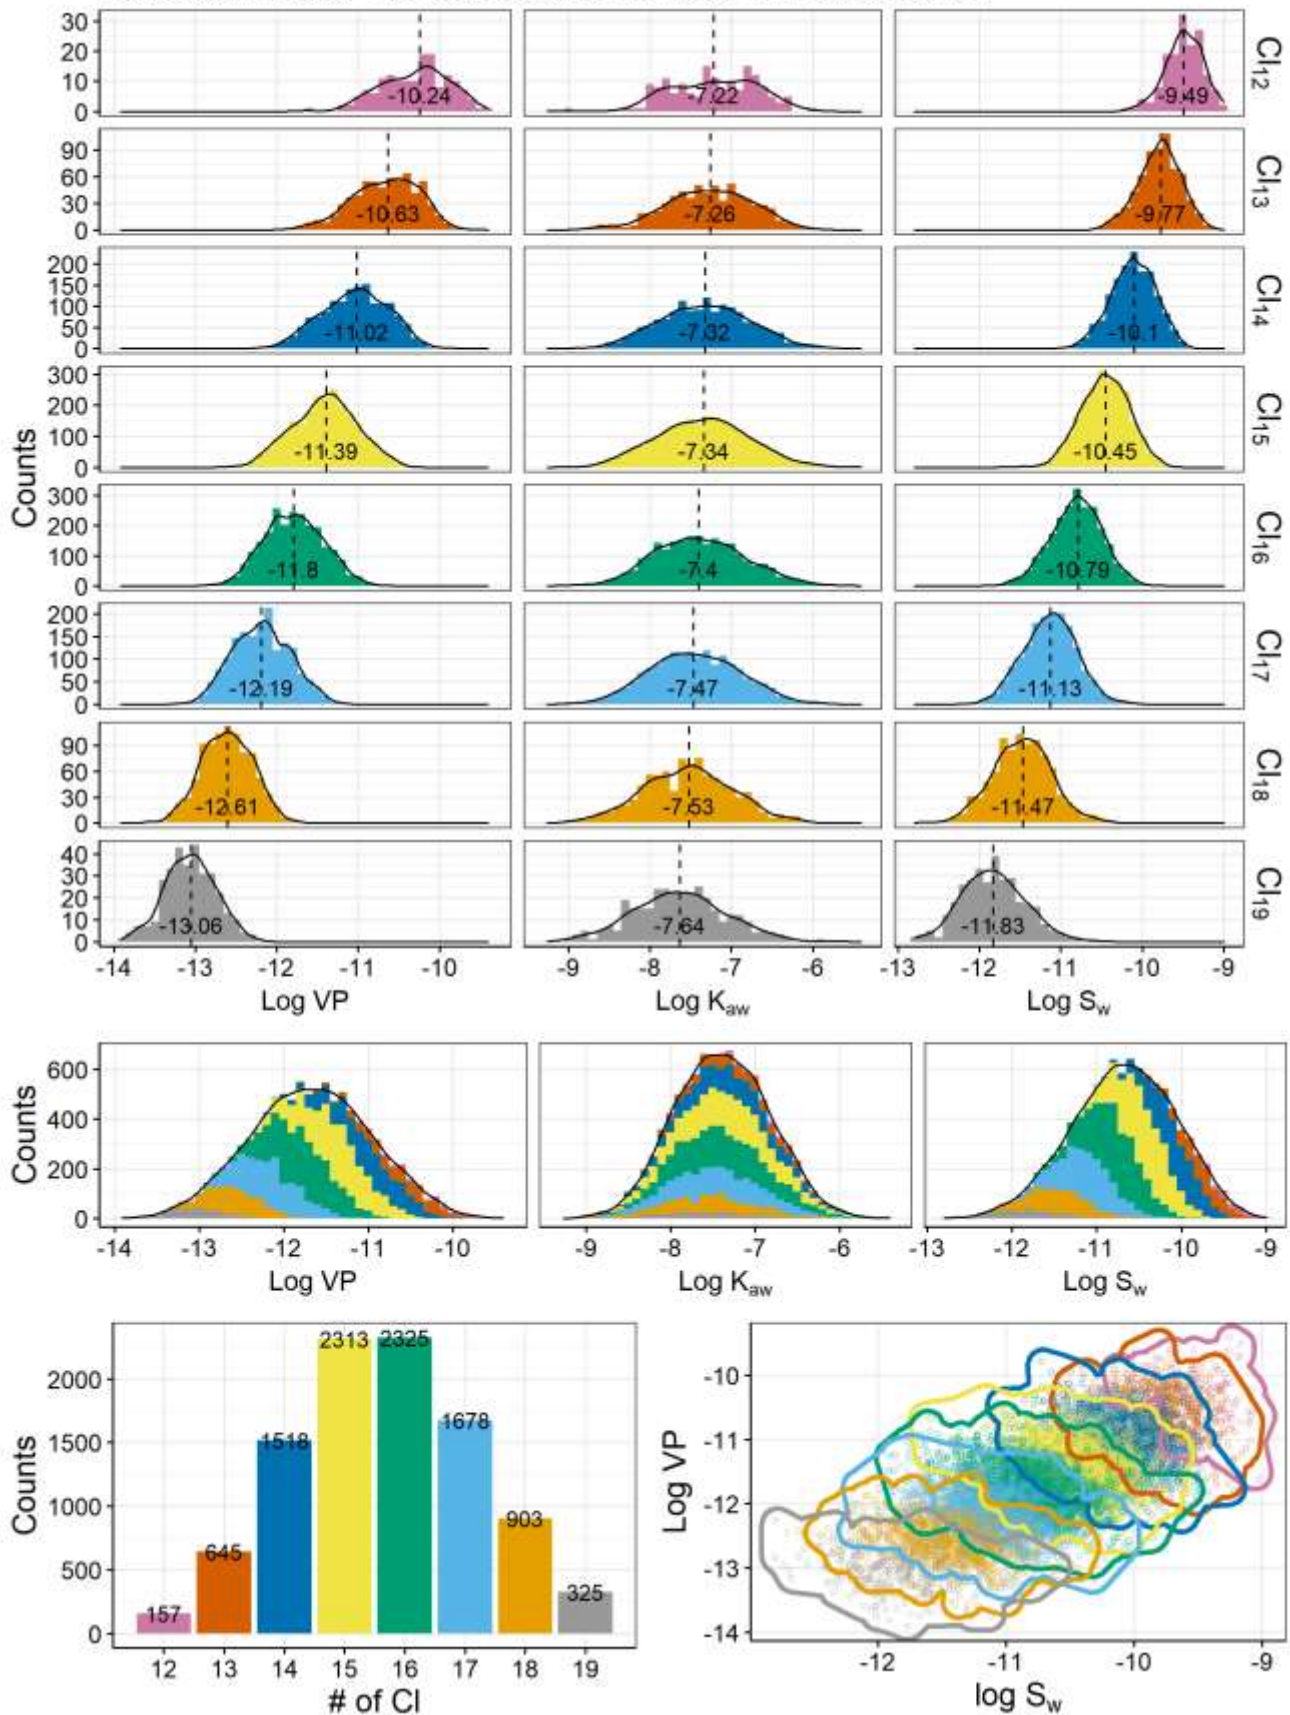

## C19, 30wt% CI

Total counts, 10,000; <100 counts omitted; bin width, 0.1; values, median

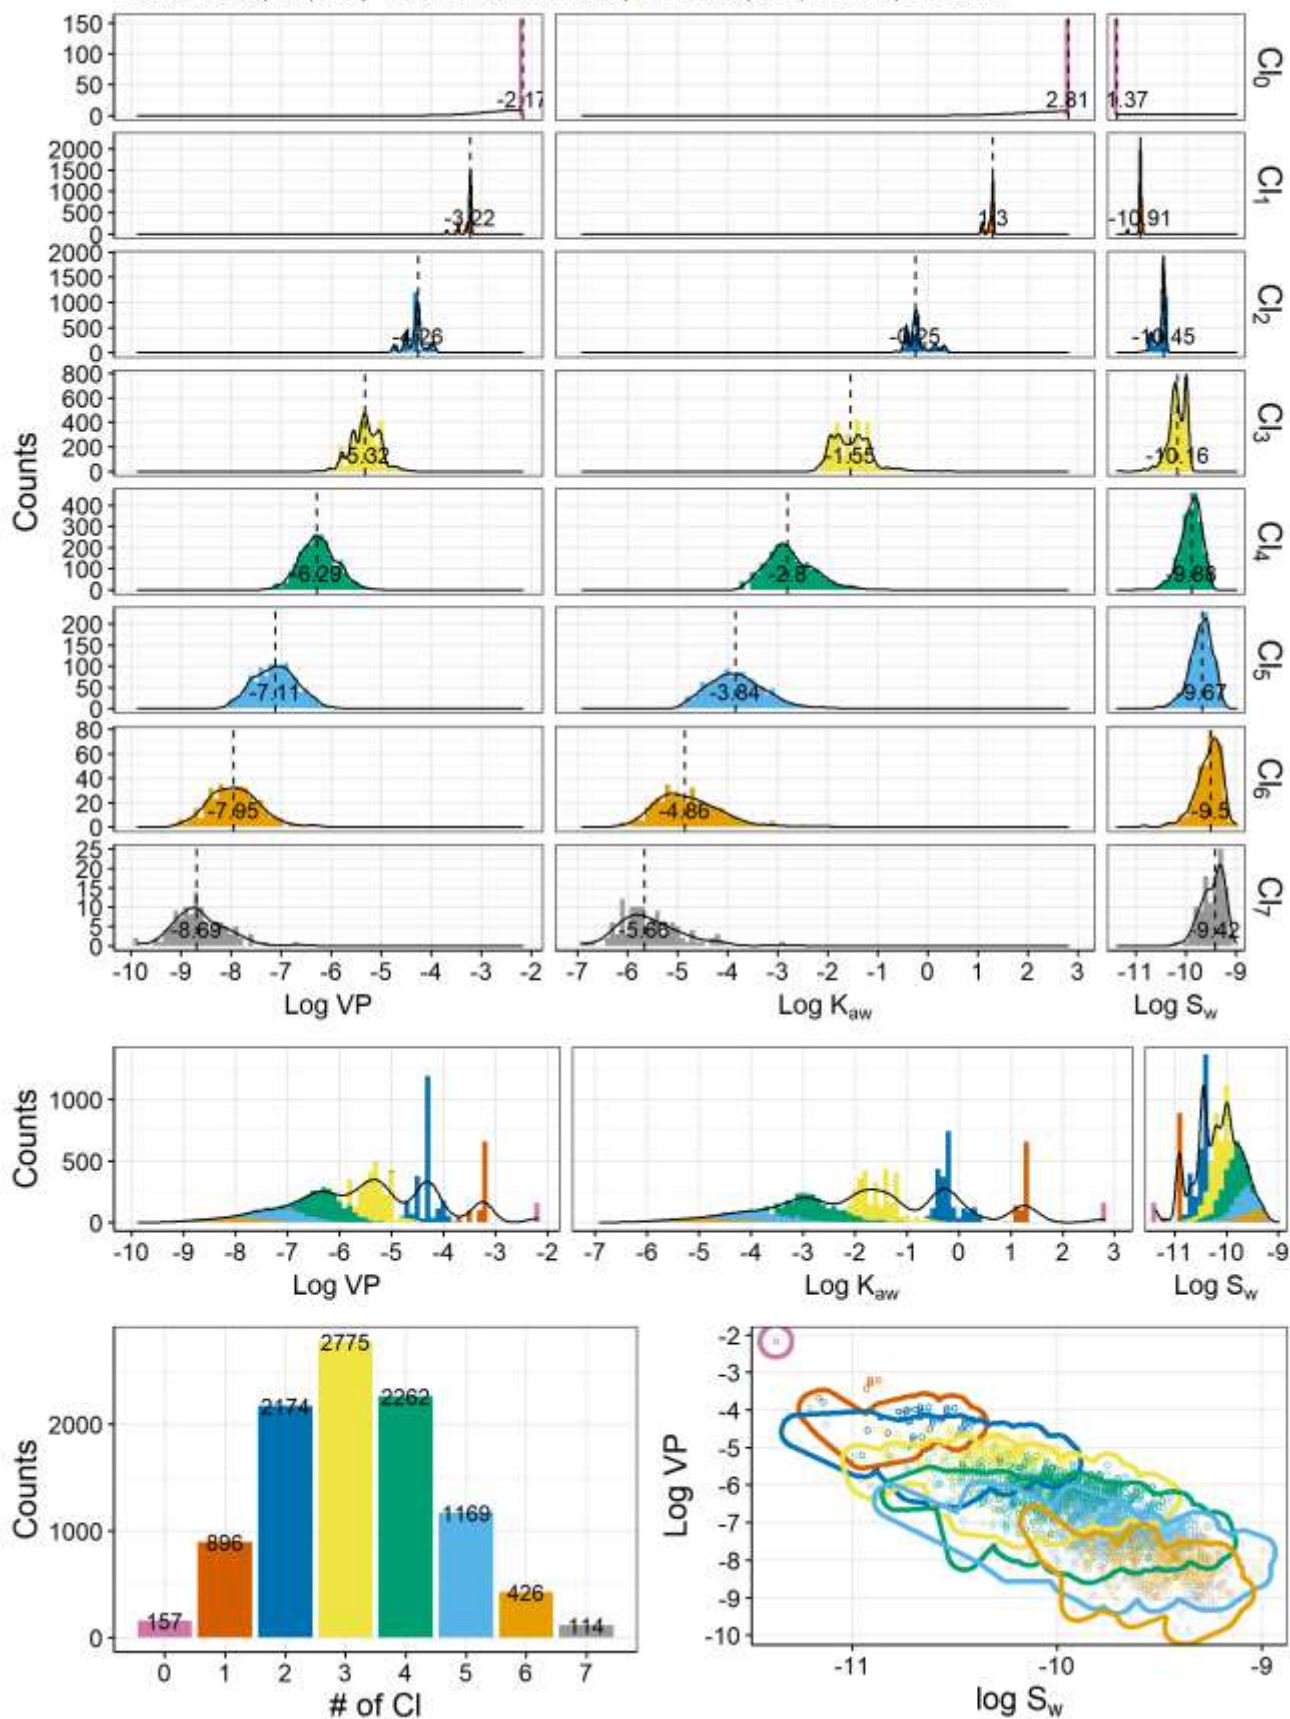



## C19, 40wt% CI

Total counts, 10,000; <100 counts omitted; bin width, 0.1; values, median

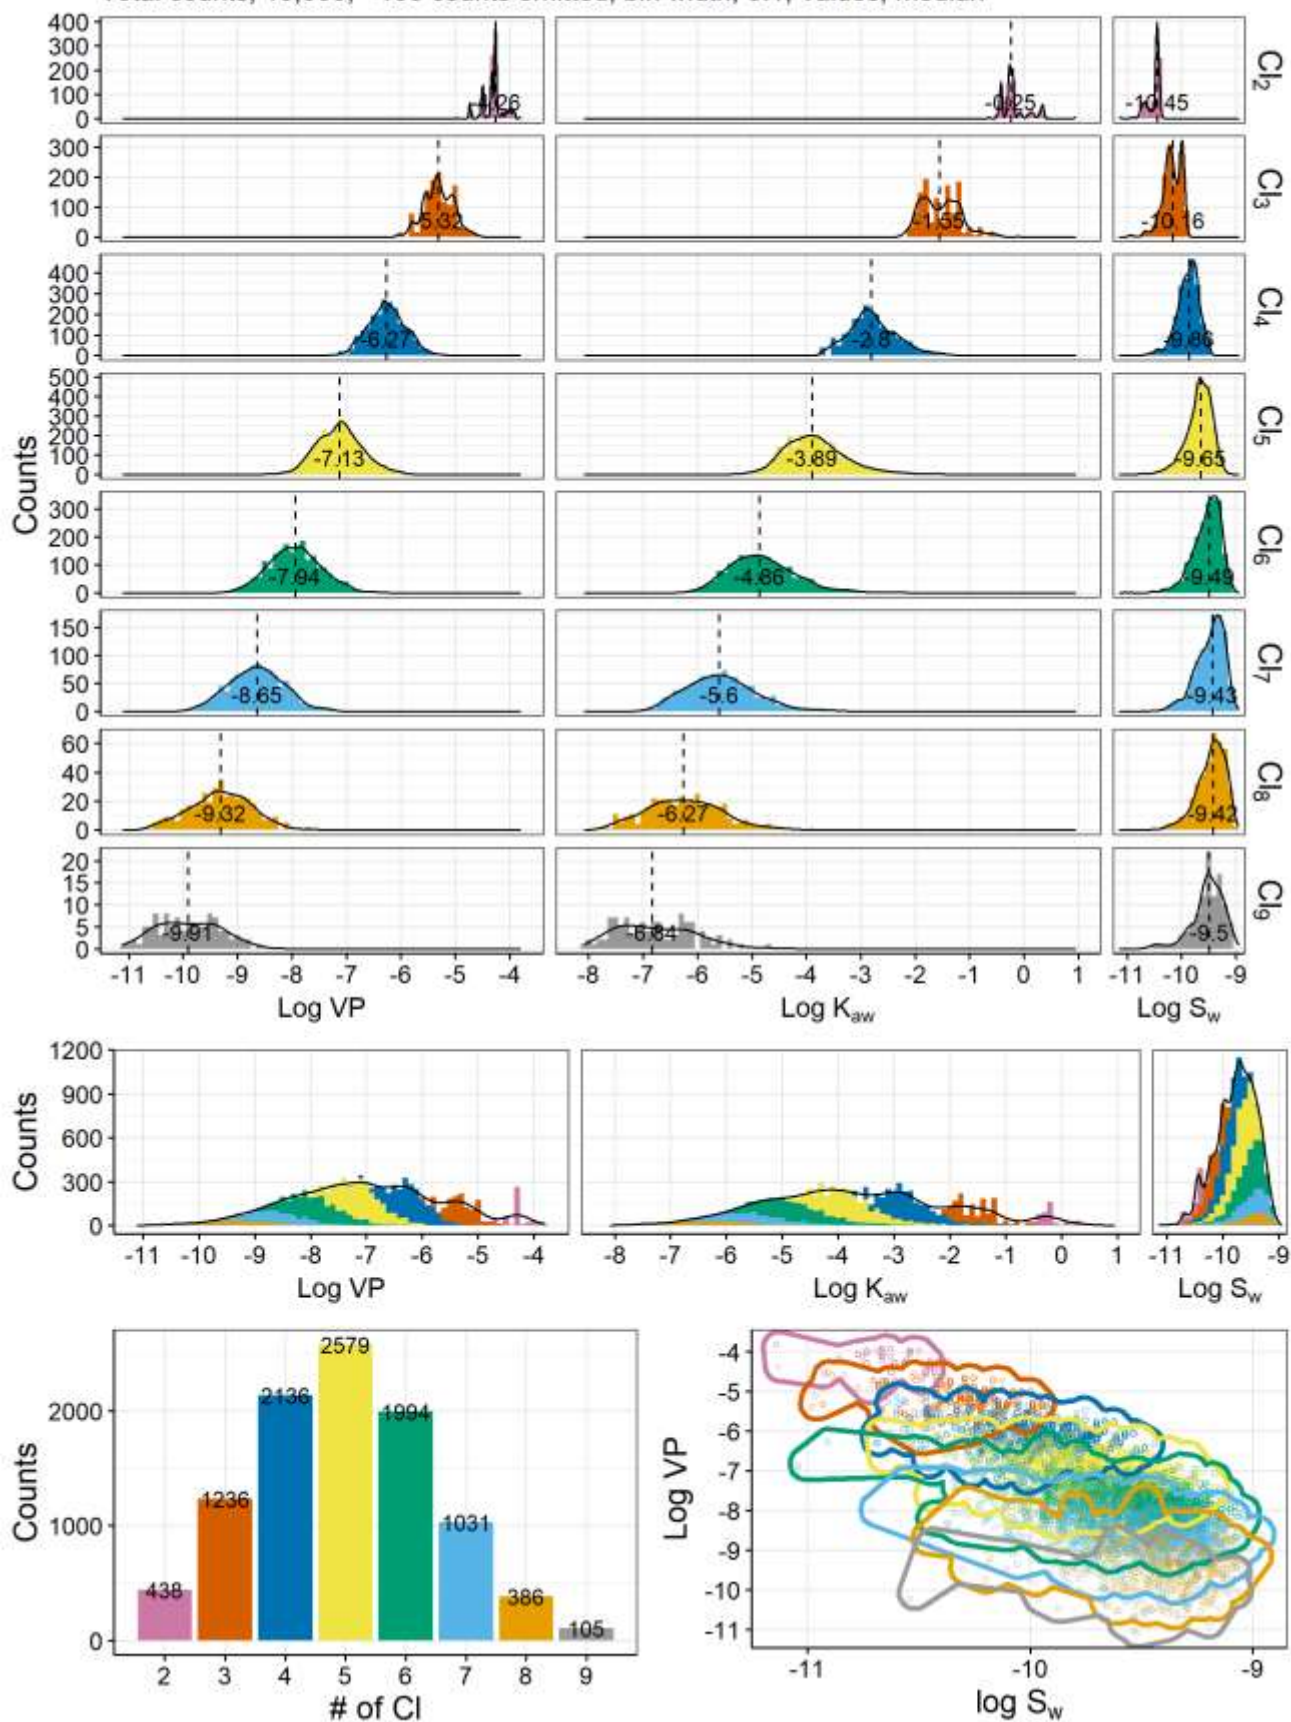

## C19, 50wt% CI

Total counts, 10,000; <100 counts omitted; bin width, 0.1; values, median

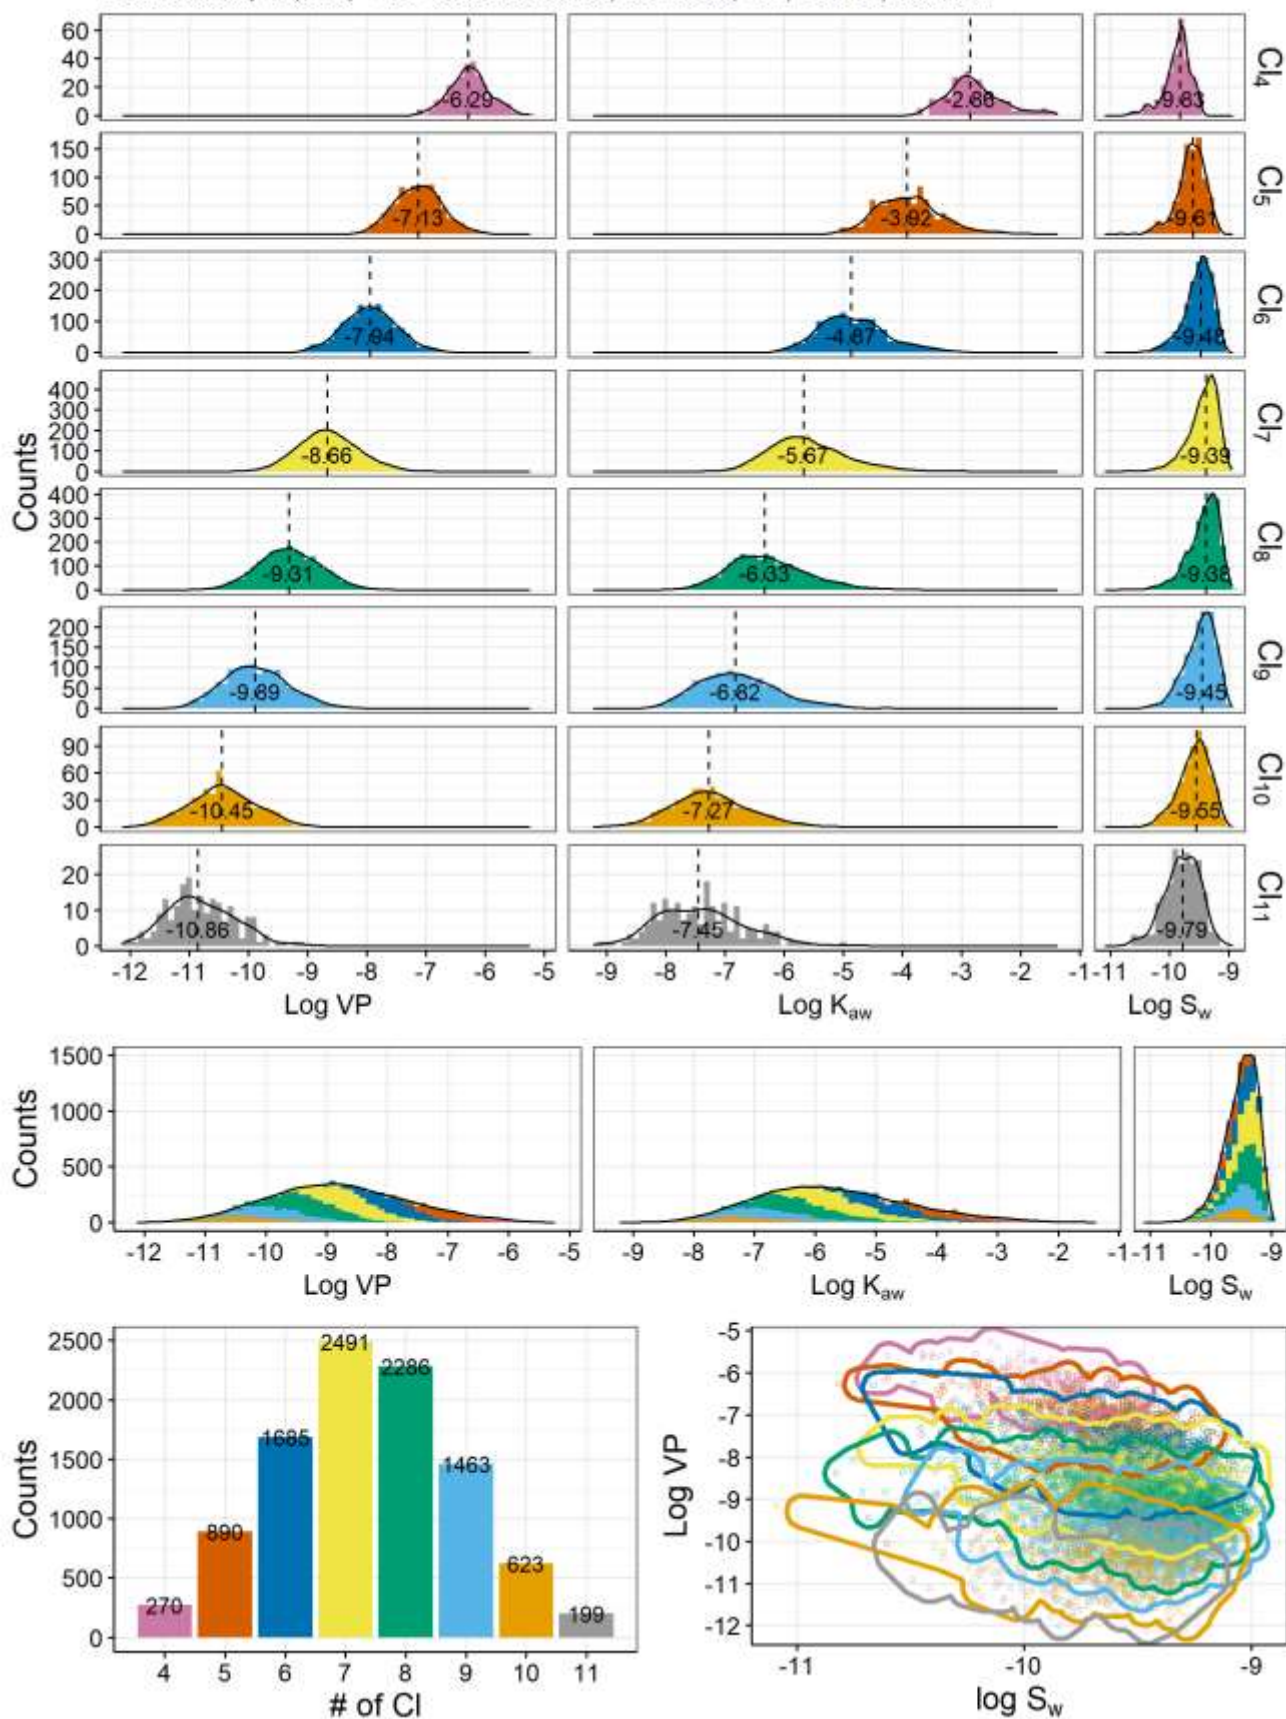

## C19, 60wt% CI

Total counts, 10,000; <100 counts omitted; bin width, 0.1; values, median

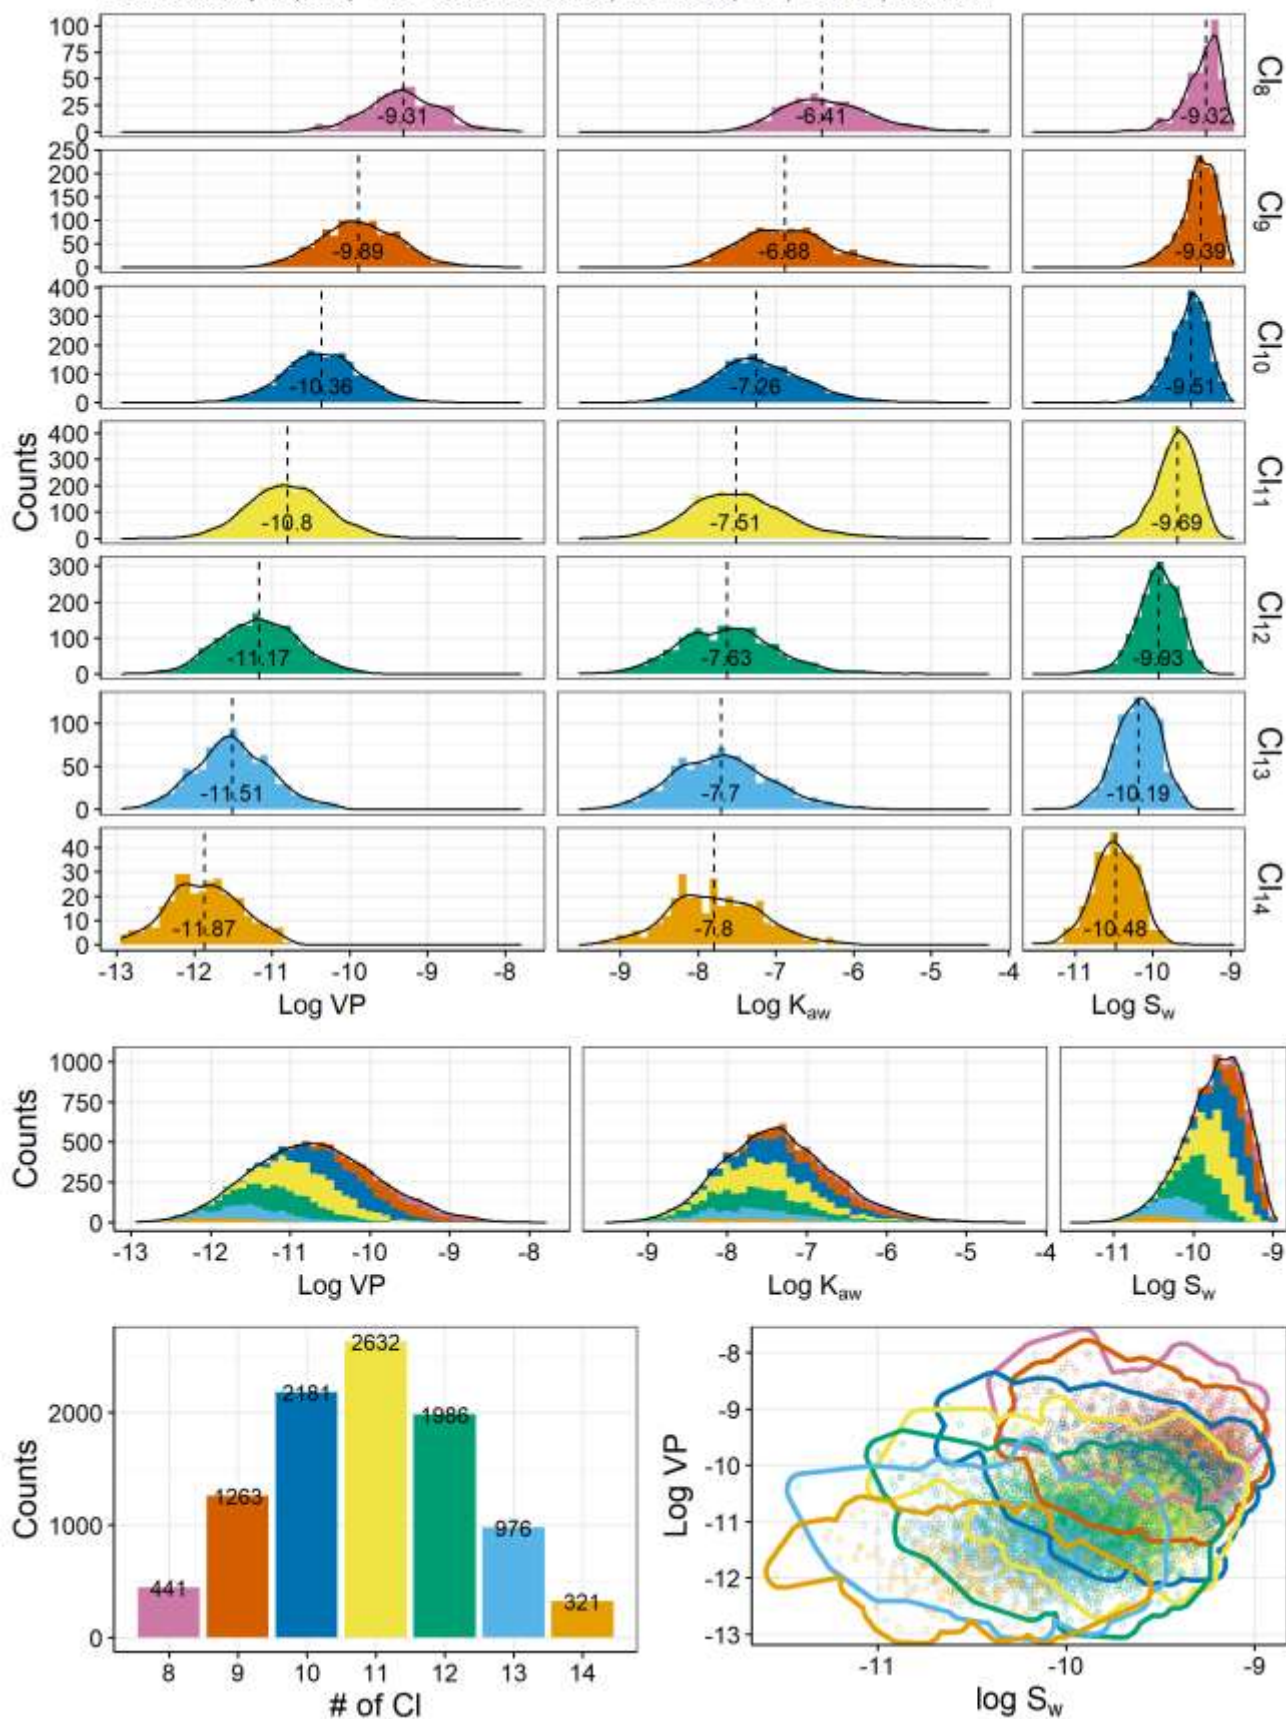



## C19, 70wt% CI

Total counts, 10,000; <100 counts omitted; bin width, 0.1; values, median

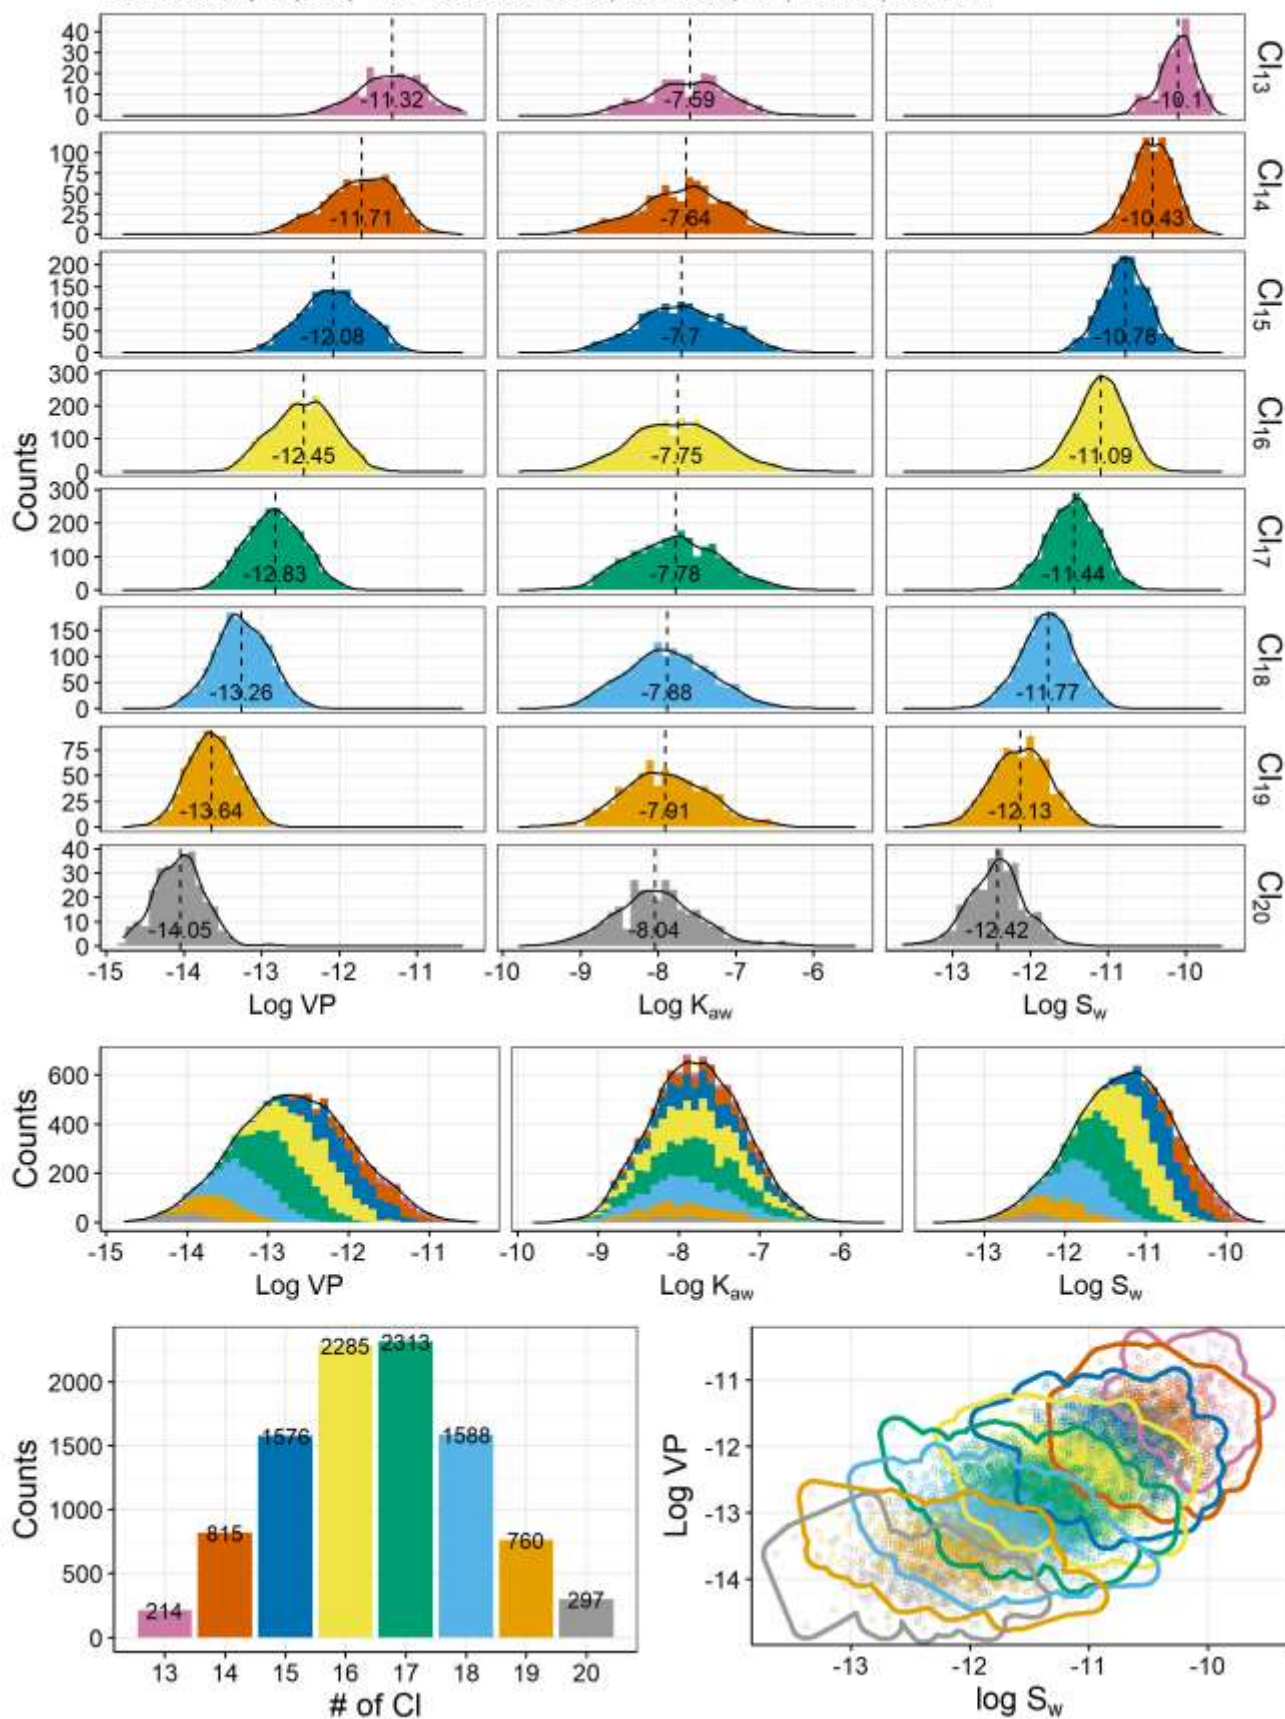

## C20, 30wt% CI

Total counts, 10,000; <100 counts omitted; bin width, 0.1; values, median

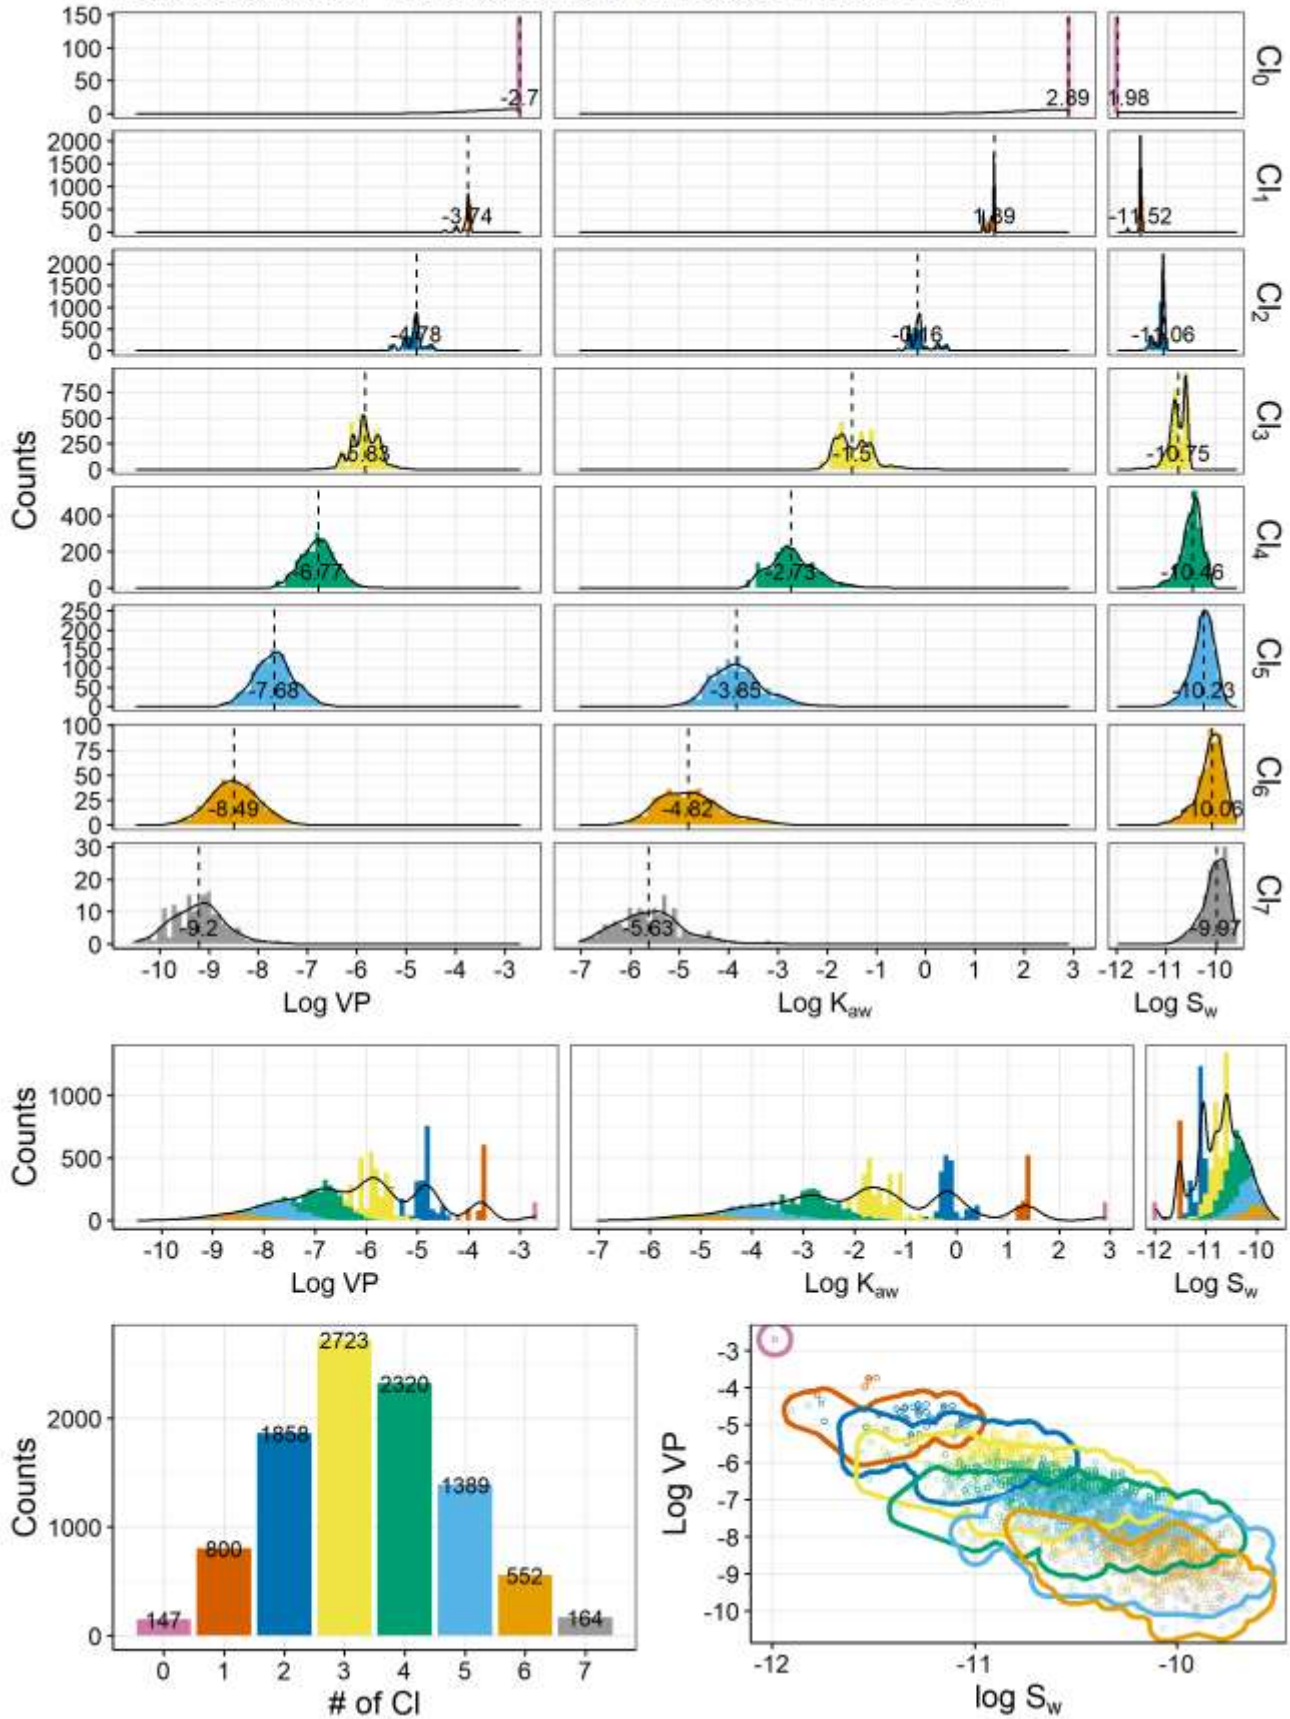

## C20, 40wt% CI

Total counts, 10,000; <100 counts omitted; bin width, 0.1; values, median

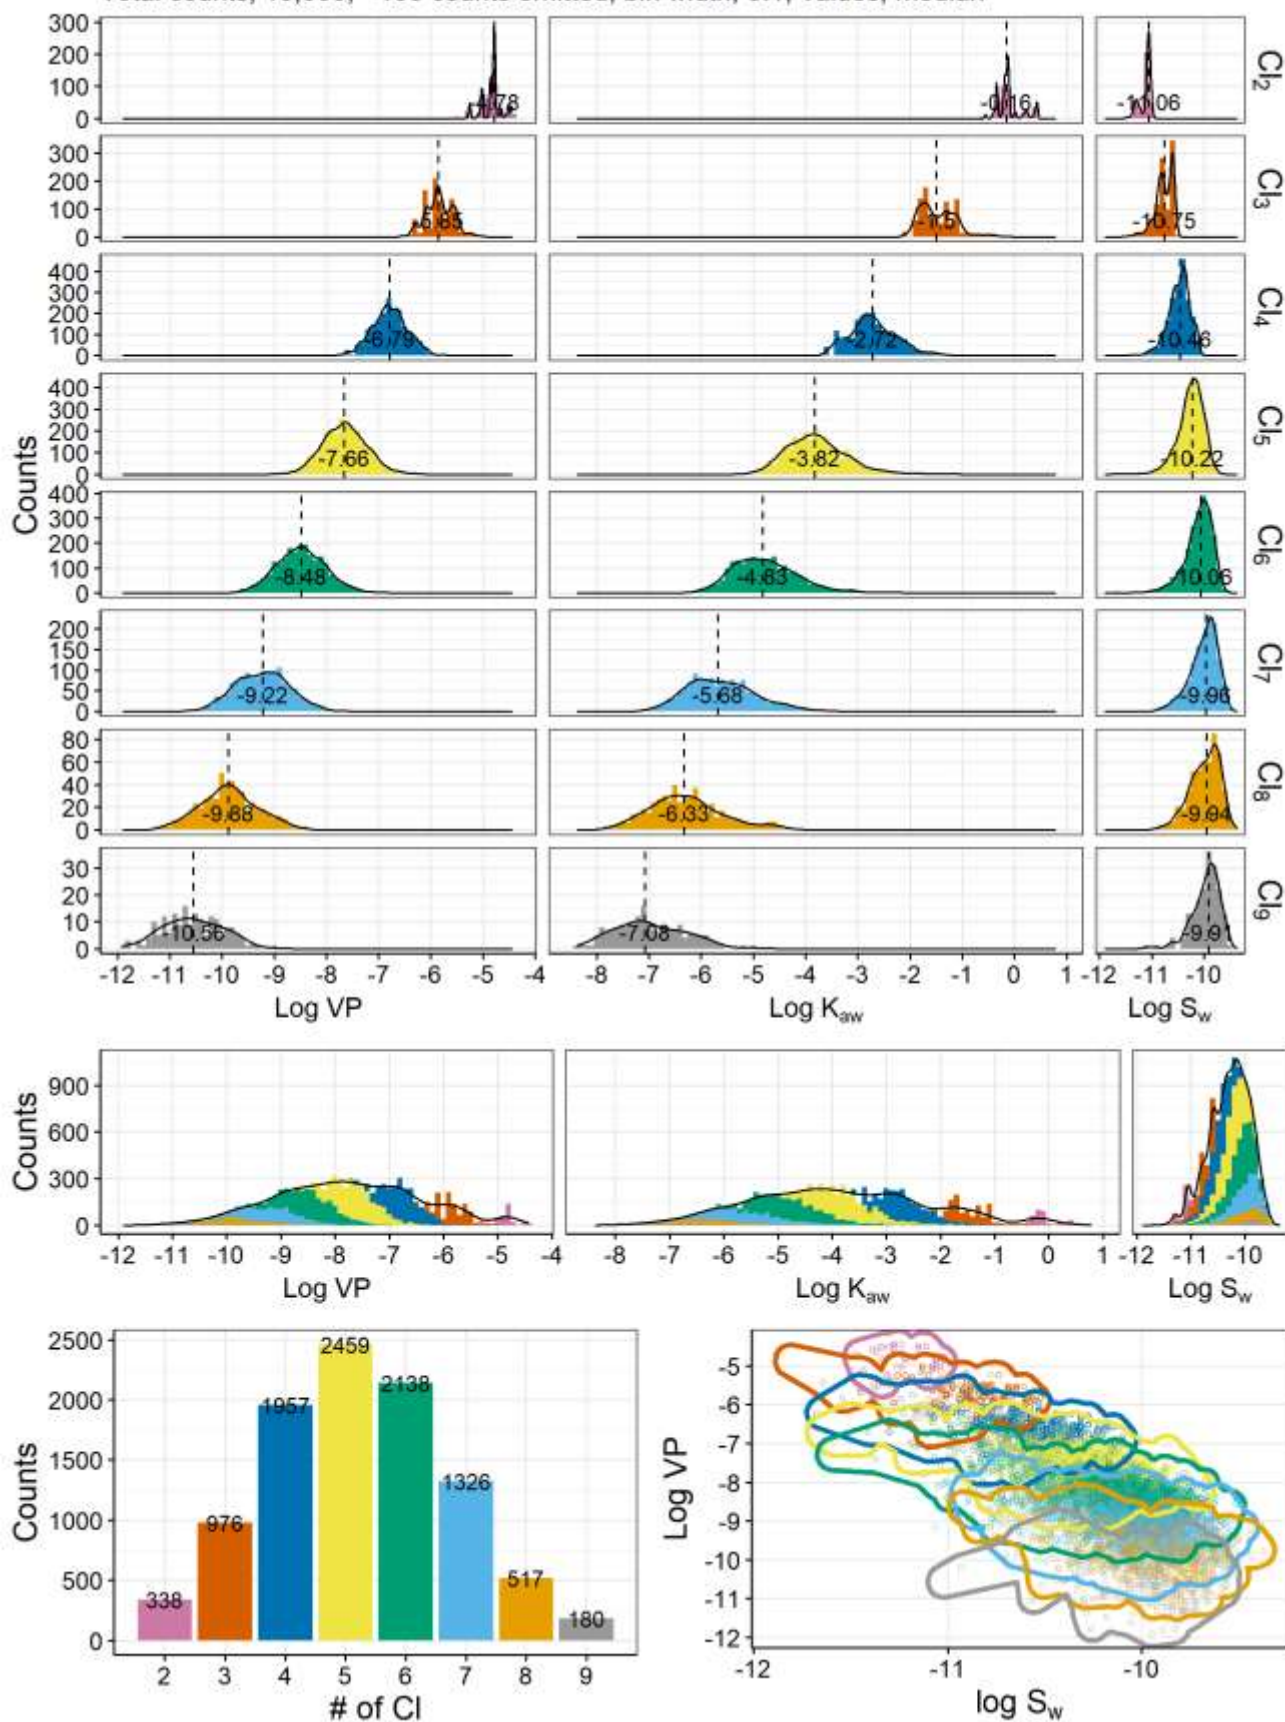



## C20, 50wt% CI

Total counts, 10,000; <100 counts omitted; bin width, 0.1; values, median

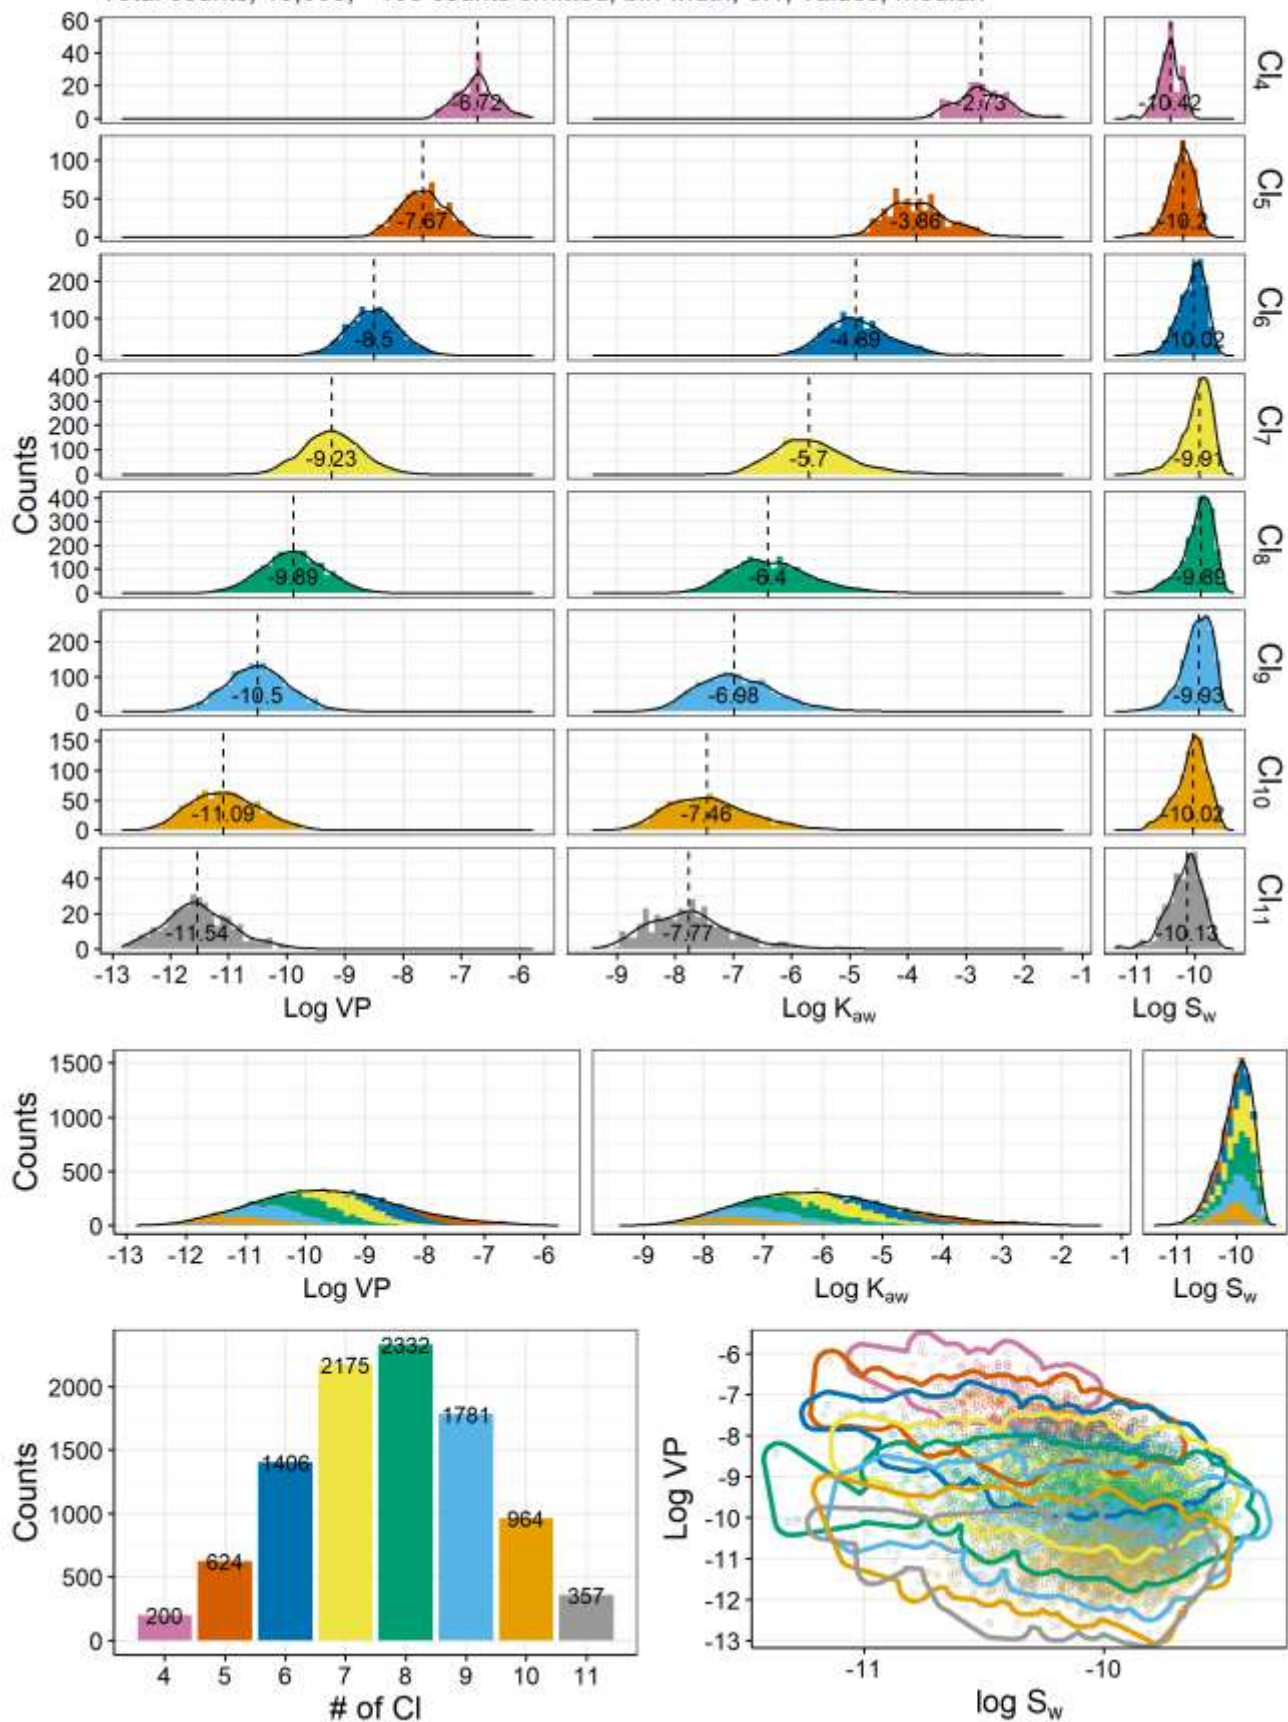

## C20, 60wt% CI

Total counts, 10,000; <100 counts omitted; bin width, 0.1; values, median

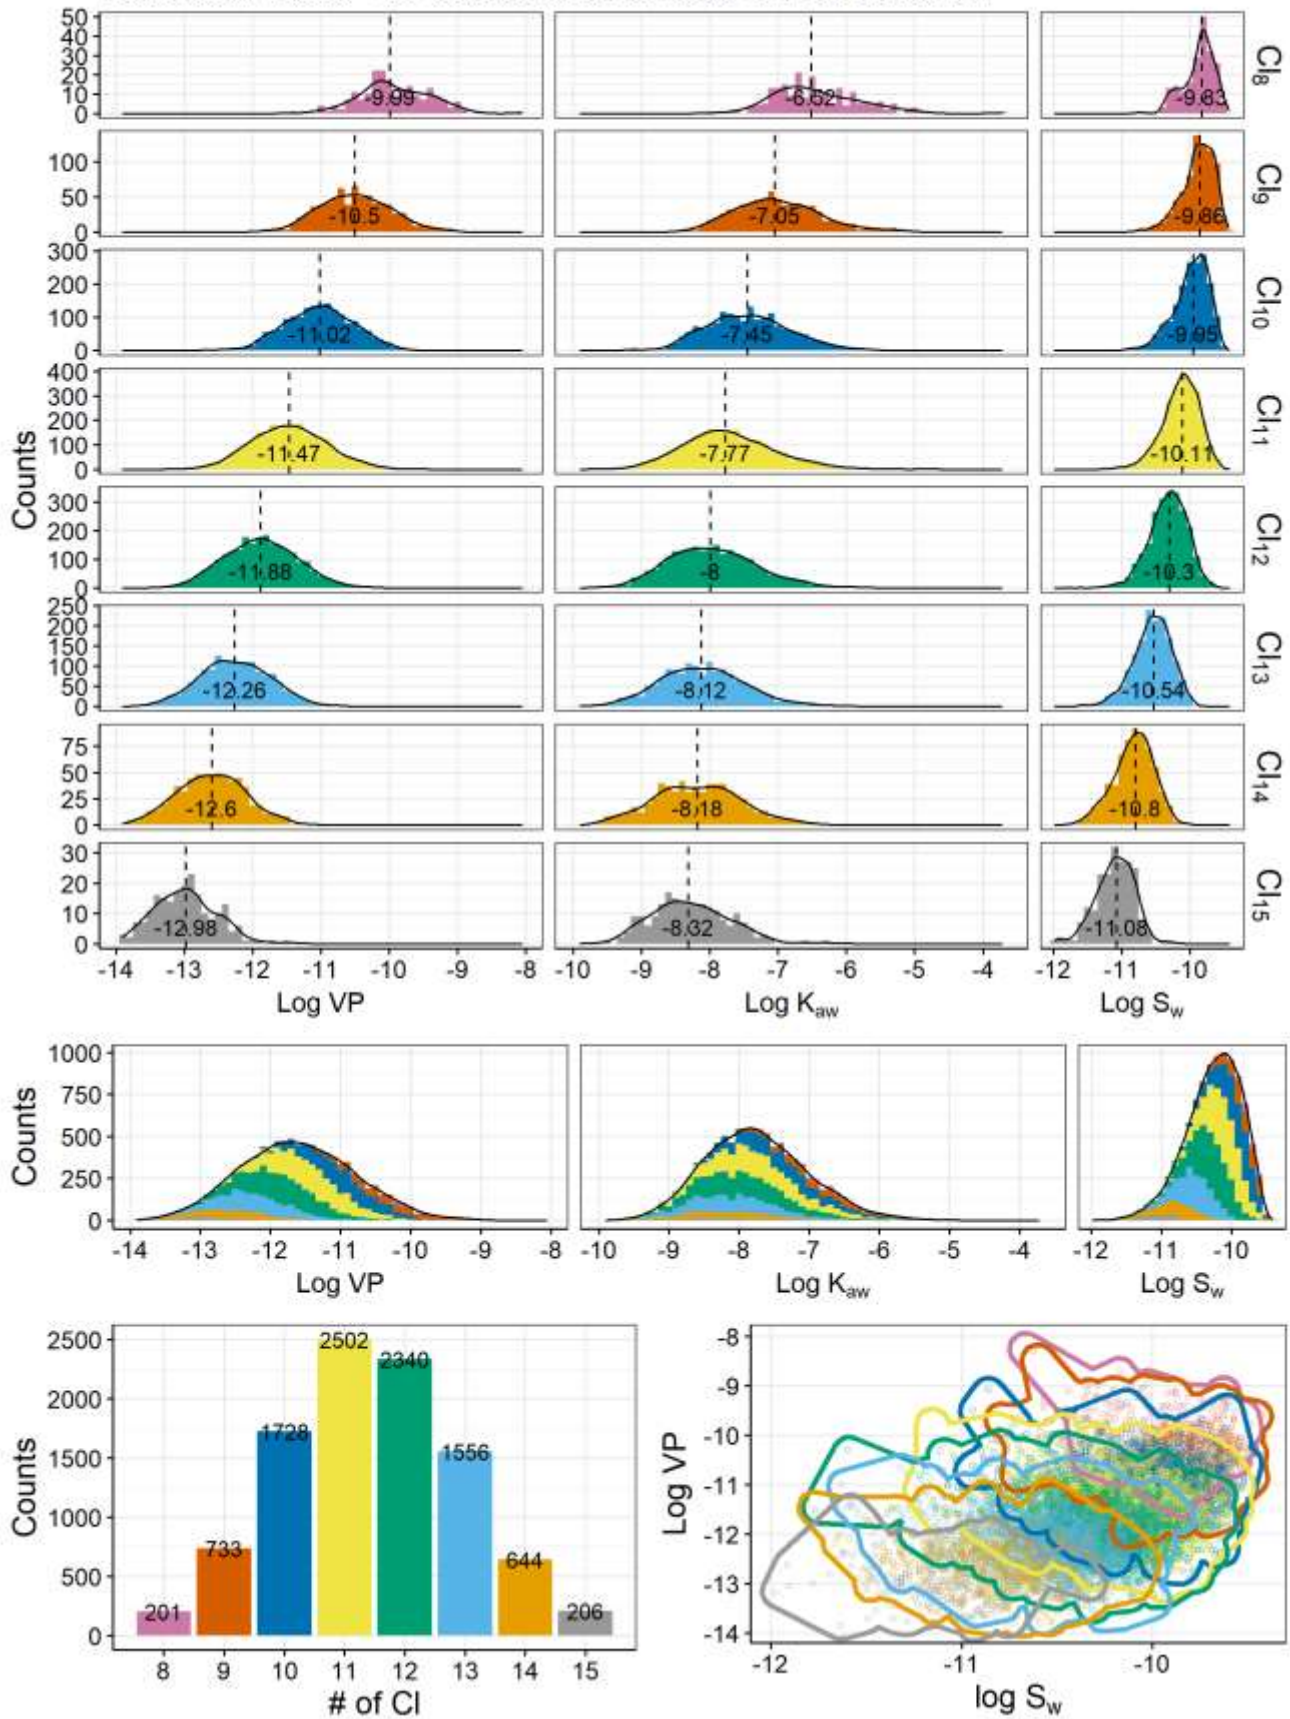

## C20, 70wt% CI

Total counts, 10,000; <100 counts omitted; bin width, 0.1; values, median

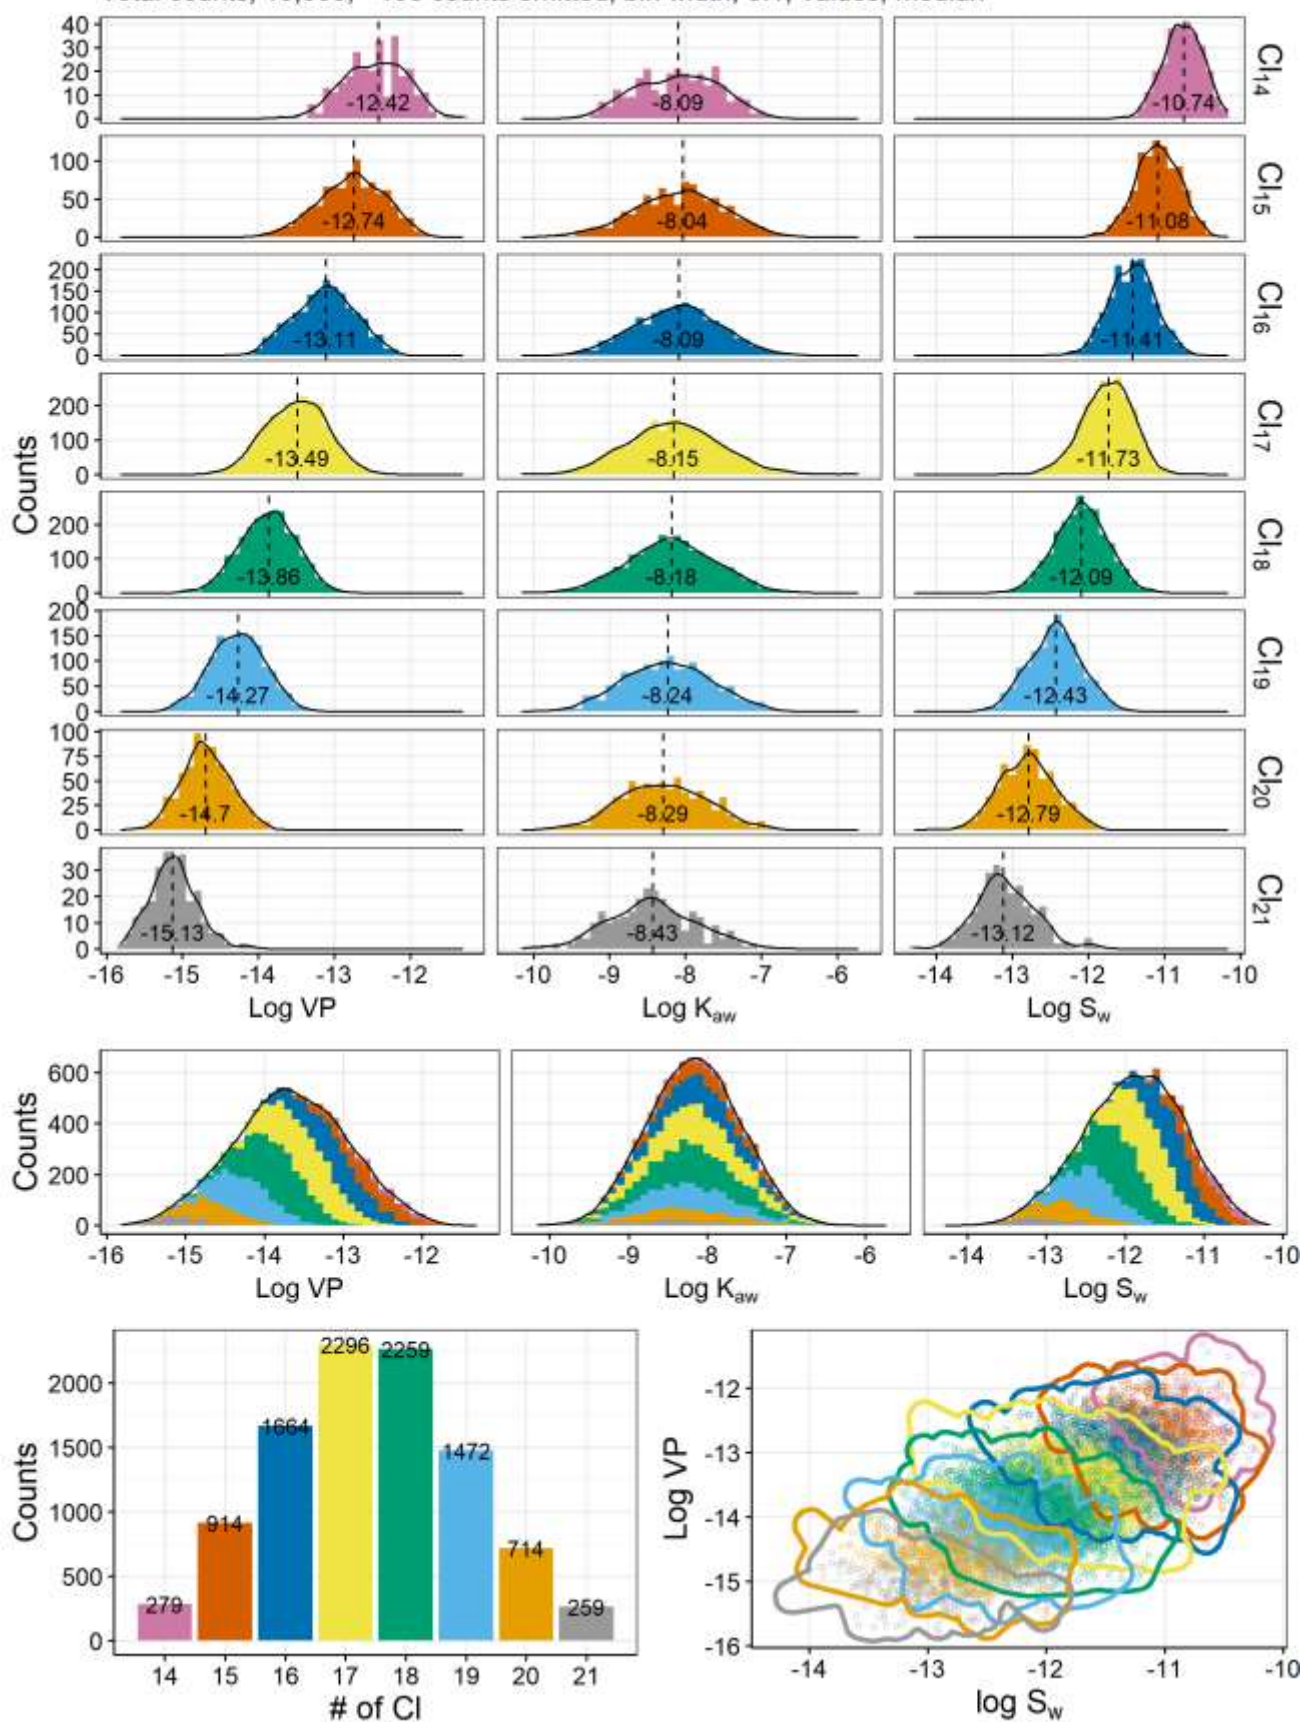

Supplement: d1em00123j1.zip [file d1em00123j1.zip]
