# Supplementary material for: Refinement and extension of COSMO-RS-trained fragment contribution models for predicting the partition properties of C 10–20 chlorinated paraffin congeners
Source: Royal Society of Chemistry journal article supplement (doi:10.1039/d1em00123j), 2021-01-01
Supplement: d1em00123j1.zip [file d1em00123j1.zip]

## Sheet: dHow
	mean	SD	n of molecules	0.025	0.25	0.5 (median)	0.75	0.975
C10Cl0	-5.81139	0	1316	-5.81139	-5.81139	-5.81139	-5.81139	-5.81139
C10Cl1	-4.8692	0.788928	4815	-7.78294	-4.88826	-4.58676	-4.58676	-4.58529
C10Cl2	-3.93255	1.3012	7581	-6.85981	-3.86869	-3.66216	-3.20673	-2.44805
C10Cl3	-3.06613	1.6559	7559	-6.54989	-4.58315	-2.63838	-1.72997	-0.924956
C10Cl4	-2.24391	1.81323	6346	-6.69302	-3.53531	-1.81942	-0.867888	0.369887
C10Cl5	-1.67366	1.7565	5472	-5.61904	-2.84732	-1.39289	-0.367817	1.03456
C10Cl6	-1.32738	1.58953	4498	-4.6752	-2.19862	-1.34698	-0.0789608	1.47787
C10Cl7	-0.977614	1.3695	3166	-3.63279	-1.78111	-0.88701	-0.0595156	1.47157
C10Cl8	-0.754879	1.2606	3097	-3.20666	-1.64852	-0.67471	0.136785	1.73744
C10Cl9	-0.765268	1.22515	3108	-3.36065	-1.53666	-0.790487	0.0277428	1.55657
C10Cl10	-0.927655	1.30611	1859	-3.69733	-1.77545	-0.867937	0.0105244	1.47458
C10Cl11	-1.16201	1.3616	706	-3.87198	-2.08973	-1.20114	-0.288877	1.51983
C10Cl12	-1.39856	1.34111	126	-3.53175	-2.35531	-1.46814	-0.656398	1.66927
C11Cl0	-7.02274	0	1014	-7.02274	-7.02274	-7.02274	-7.02274	-7.02274
C11Cl1	-6.05421	0.760922	4062	-8.99428	-6.09961	-5.79811	-5.79811	-5.79663
C11Cl2	-5.06	1.20015	6681	-7.76965	-4.98257	-4.77853	-4.50652	-3.65939
C11Cl3	-4.09069	1.58892	7123	-7.41092	-4.51625	-3.60254	-2.85816	-2.26569
C11Cl4	-3.18724	1.79365	6334	-7.04315	-4.60988	-2.74083	-1.8085	-0.729262
C11Cl5	-2.42405	1.81442	5287	-6.5829	-3.70642	-2.09386	-0.9928	0.403992
C11Cl6	-1.84316	1.67981	4727	-5.54321	-2.93619	-1.67182	-0.571158	0.898149
C11Cl7	-1.53004	1.57735	3507	-4.77581	-2.43402	-1.55526	-0.265982	1.079
C11Cl8	-1.1588	1.37078	2635	-3.8404	-2.11294	-1.05453	-0.245914	1.31846
C11Cl9	-0.965332	1.26201	3097	-3.39398	-1.85513	-0.939722	-0.0339179	1.39653
C11Cl10	-1.0325	1.29471	2864	-3.68543	-1.87246	-0.98051	-0.181291	1.44978
C11Cl11	-1.18117	1.30317	1669	-3.87912	-2.05068	-1.12966	-0.262593	1.1308
C11Cl12	-1.47287	1.48014	620	-4.45633	-2.42098	-1.46605	-0.449397	1.51191
C11Cl13	-1.81233	1.52624	134	-4.48011	-2.75102	-1.92347	-1.0024	1.85648
C12Cl0	-8.23408	0	749	-8.23408	-8.23408	-8.23408	-8.23408	-8.23408
C12Cl1	-7.25785	0.753806	3352	-10.2056	-7.00945	-7.00945	-7.00945	-7.00797
C12Cl2	-6.23335	1.17706	6067	-8.98099	-6.08632	-5.9884	-5.71786	-4.87073
C12Cl3	-5.19215	1.49376	6626	-8.26292	-5.42952	-4.7623	-4.12477	-3.57805
C12Cl4	-4.18463	1.77452	6144	-8.04944	-5.66696	-3.6777	-2.83319	-1.87779
C12Cl5	-3.31682	1.86521	5264	-7.81418	-4.64004	-2.91007	-1.89046	-0.430798
C12Cl6	-2.53736	1.77545	4587	-6.62153	-3.80129	-2.25718	-1.15905	0.195002
C12Cl7	-2.071	1.6899	3872	-5.70183	-3.05668	-1.99736	-0.770341	0.742612
C12Cl8	-1.74933	1.51985	2783	-4.76571	-2.64456	-1.7404	-0.598378	0.851126
C12Cl9	-1.3341	1.3271	2402	-4.05591	-2.23144	-1.27647	-0.411985	1.22723
C12Cl10	-1.25565	1.28794	2993	-3.89624	-2.14123	-1.27615	-0.335016	1.10069
C12Cl11	-1.34577	1.32883	2636	-4.05024	-2.2471	-1.27193	-0.433606	1.20277
C12Cl12	-1.52522	1.39035	1504	-4.47399	-2.42922	-1.43036	-0.516335	0.987811
C12Cl13	-1.8827	1.47445	546	-4.68707	-2.79968	-1.93795	-0.901771	1.19829
C12Cl14	-2.34354	1.55835	140	-5.12964	-3.49582	-2.34751	-1.10561	0.51447
C13Cl0	-9.44542	0	608	-9.44542	-9.44542	-9.44542	-9.44542	-9.44542
C13Cl1	-8.41385	0.661891	2796	-11.417	-8.22079	-8.22079	-8.22079	-8.21931
C13Cl2	-7.38805	1.11886	5366	-10.1923	-7.29766	-6.99616	-6.99321	-6.08207
C13Cl3	-6.29143	1.43368	6310	-9.2692	-6.55333	-5.90963	-5.28232	-4.79048
C13Cl4	-5.30202	1.72294	6015	-8.95781	-6.82898	-4.80403	-3.98913	-3.09061
C13Cl5	-4.31482	1.86362	5183	-8.89701	-5.65663	-3.87371	-2.90435	-1.59833
C13Cl6	-3.35419	1.81642	4350	-7.60234	-4.61168	-3.04548	-1.98894	-0.466001
C13Cl7	-2.69456	1.78406	3969	-6.72709	-3.8396	-2.5057	-1.36973	0.170194
C13Cl8	-2.25767	1.66519	3230	-5.69188	-3.2452	-2.24	-0.968151	0.689025
C13Cl9	-1.87311	1.43404	2167	-4.77722	-2.76642	-1.82142	-0.894921	0.687252
C13Cl10	-1.48974	1.36419	2290	-4.13339	-2.48403	-1.41915	-0.520839	1.12479
C13Cl11	-1.48503	1.33862	2829	-4.16015	-2.3991	-1.47048	-0.533111	0.974375
C13Cl12	-1.58942	1.36031	2454	-4.36995	-2.53922	-1.53598	-0.636642	1.05352
C13Cl13	-1.82007	1.42969	1402	-4.68947	-2.78313	-1.7508	-0.86171	0.877911
C13Cl14	-2.2062	1.55199	492	-5.02981	-3.21512	-2.28641	-1.20107	1.02354
C13Cl15	-2.69333	1.58908	120	-5.45984	-3.79152	-2.65125	-1.4907	-0.183871
C14Cl0	-10.6568	0	499	-10.6568	-10.6568	-10.6568	-10.6568	-10.6568
C14Cl1	-9.64076	0.70579	2359	-12.6283	-9.43213	-9.43213	-9.43213	-9.43066
C14Cl2	-8.54099	1.04773	4760	-11.4037	-8.509	-8.2075	-8.20455	-7.29341
C14Cl3	-7.48166	1.40169	5910	-10.4805	-7.69347	-7.12897	-6.57573	-6.00221
C14Cl4	-6.36986	1.67793	5851	-9.82374	-7.09499	-5.87203	-5.11215	-4.30949
C14Cl5	-5.3447	1.82272	5104	-9.65697	-6.76922	-4.85307	-3.97415	-2.80499
C14Cl6	-4.34233	1.87478	4148	-8.85397	-5.64296	-3.94949	-2.93984	-1.44256
C14Cl7	-3.54757	1.80173	3899	-7.67883	-4.79248	-3.34763	-2.14695	-0.659246
C14Cl8	-2.92771	1.79269	3613	-6.83413	-4.07789	-2.87592	-1.53678	0.0626003
C14Cl9	-2.47132	1.5916	2568	-5.7269	-3.44529	-2.4806	-1.29924	0.364706
C14Cl10	-2.02722	1.49189	1821	-4.93798	-3.02494	-1.95468	-0.987854	0.695732
C14Cl11	-1.77685	1.32607	2297	-4.33004	-2.73882	-1.72958	-0.848378	0.716577
C14Cl12	-1.7375	1.3478	2710	-4.31578	-2.65598	-1.74503	-0.785938	0.761412
C14Cl13	-1.84983	1.3816	2365	-4.64965	-2.74114	-1.8015	-0.883194	0.803885
C14Cl14	-2.11588	1.53103	1263	-5.24031	-3.12266	-2.03583	-1.05688	0.744753
C14Cl15	-2.56049	1.57945	419	-5.45823	-3.61604	-2.56085	-1.52611	0.684406
C14Cl16	-3.04164	1.62296	119	-6.14142	-4.07088	-3.12724	-1.75533	-0.171539
C15Cl0	-11.8681	0	387	-11.8681	-11.8681	-11.8681	-11.8681	-11.8681
C15Cl1	-10.8326	0.661325	1958	-13.8396	-10.6435	-10.6435	-10.6435	-10.642
C15Cl2	-9.74068	1.00379	4209	-12.615	-9.72034	-9.41884	-9.41737	-8.50476
C15Cl3	-8.65514	1.37915	5529	-11.6919	-8.79721	-8.24239	-7.78707	-7.21355
C15Cl4	-7.47839	1.60974	5637	-11.0135	-7.9827	-6.98693	-6.31684	-5.58712
C15Cl5	-6.41341	1.8348	4915	-10.3756	-7.92805	-5.90525	-5.00943	-3.93312
C15Cl6	-5.37137	1.90867	4354	-9.92386	-6.74359	-4.96713	-3.9195	-2.47623
C15Cl7	-4.3835	1.89419	3622	-8.6845	-5.69458	-4.16681	-2.91507	-1.35345
C15Cl8	-3.62126	1.84543	3465	-7.68429	-4.85327	-3.44742	-2.21849	-0.577836
C15Cl9	-3.04498	1.67258	3121	-6.50081	-4.06438	-3.06839	-1.78251	-0.122196
C15Cl10	-2.66634	1.58294	2013	-5.78823	-3.66271	-2.62946	-1.50666	0.199709
C15Cl11	-2.1221	1.44095	1616	-4.87239	-3.1532	-2.05207	-1.10355	0.578683
C15Cl12	-1.96475	1.33861	2322	-4.60084	-2.88145	-1.93014	-1.01716	0.68946
C15Cl13	-2.01026	1.41918	2674	-4.85265	-2.97589	-1.95774	-0.992036	0.589643
C15Cl14	-2.21483	1.47145	2135	-5.21943	-3.17941	-2.20912	-1.17424	0.463833
C15Cl15	-2.46084	1.53277	1128	-5.48007	-3.48639	-2.38731	-1.38163	0.375198
C15Cl16	-2.89841	1.59197	414	-5.98716	-4.01822	-2.86391	-1.82163	0.272461
C15Cl17	-3.38576	1.74667	113	-6.83191	-4.27687	-3.44053	-2.44528	0.203043
C16Cl0	-13.0794	0	323	-13.0794	-13.0794	-13.0794	-13.0794	-13.0794
C16Cl1	-12.0153	0.599866	1675	-15.051	-11.8548	-11.8548	-11.8548	-11.8533
C16Cl2	-10.9407	1.00039	3723	-13.8264	-10.9317	-10.6302	-10.6287	-9.7161
C16Cl3	-9.81603	1.32838	5182	-12.9032	-9.91211	-9.40408	-9.03415	-8.437
C16Cl4	-8.66358	1.57798	5339	-12.2248	-9.0976	-8.18288	-7.52831	-6.80031
C16Cl5	-7.48585	1.75429	4890	-11.2053	-8.91516	-6.96795	-6.18328	-5.15266
C16Cl6	-6.41345	1.87482	4290	-10.9257	-7.84953	-5.95173	-5.01049	-3.6866
C16Cl7	-5.37949	1.95627	3602	-9.93548	-6.72883	-5.00027	-3.91133	-2.32648
C16Cl8	-4.40106	1.87305	3318	-8.72952	-5.72154	-4.15505	-2.96093	-1.36614
C16Cl9	-3.77799	1.79259	3287	-7.66817	-4.95445	-3.70408	-2.41686	-0.776928
C16Cl10	-3.29578	1.70511	2357	-6.80235	-4.33787	-3.29571	-1.99046	-0.310614
C16Cl11	-2.75746	1.5504	1627	-5.89746	-3.78523	-2.72342	-1.62732	0.0339006
C16Cl12	-2.38225	1.40956	1531	-5.30616	-3.32037	-2.32762	-1.36593	0.349521
C16Cl13	-2.20616	1.38639	2286	-4.83775	-3.20027	-2.18843	-1.23933	0.442938
C16Cl14	-2.26973	1.46488	2548	-5.27736	-3.20643	-2.22681	-1.2312	0.41057
C16Cl15	-2.46333	1.50931	2033	-5.4137	-3.47987	-2.45556	-1.39784	0.312458
C16Cl16	-2.8256	1.55681	1028	-5.92423	-3.84868	-2.79756	-1.71846	0.0949578
C16Cl17	-3.11016	1.6166	371	-6.43262	-4.1446	-3.03801	-2.00042	-0.0808857
C17Cl0	-14.2908	0	241	-14.2908	-14.2908	-14.2908	-14.2908	-14.2908
C17Cl1	-13.2225	0.606459	1449	-16.2623	-13.0662	-13.0662	-13.0662	-13.0647
C17Cl2	-12.1206	0.964425	3197	-15.0377	-12.143	-11.8415	-11.8401	-10.9837
C17Cl3	-10.9756	1.26258	4814	-14.0832	-11.026	-10.6154	-10.247	-9.65633
C17Cl4	-9.79852	1.51	5234	-13.095	-10.1912	-9.32383	-8.77711	-8.05152
C17Cl5	-8.63438	1.72754	4786	-12.4191	-9.60845	-8.09164	-7.36625	-6.4563
C17Cl6	-7.49052	1.88346	4176	-12.0964	-8.90946	-6.97407	-6.07606	-4.90643
C17Cl7	-6.45128	1.9762	3537	-11.095	-7.8882	-6.04348	-4.93957	-3.435
C17Cl8	-5.44802	1.90728	3205	-9.65706	-6.82354	-5.23042	-3.9511	-2.35141
C17Cl9	-4.57496	1.89645	3226	-8.68388	-5.85449	-4.41945	-3.10041	-1.44277
C17Cl10	-3.89596	1.79868	2913	-7.69644	-4.98989	-3.86867	-2.48587	-0.807054
C17Cl11	-3.42466	1.69746	1979	-6.7075	-4.51941	-3.38188	-2.17771	-0.357514
C17Cl12	-2.98646	1.52546	1301	-6.10062	-3.98923	-2.91723	-1.94776	-0.188581
C17Cl13	-2.54532	1.41261	1567	-5.29196	-3.52002	-2.50192	-1.55954	0.184957
C17Cl14	-2.5027	1.41467	2274	-5.30088	-3.46113	-2.4534	-1.51309	0.118873
C17Cl15	-2.57871	1.46156	2481	-5.6084	-3.53092	-2.52214	-1.57251	0.131039
C17Cl16	-2.69693	1.51028	1916	-5.89997	-3.70605	-2.67764	-1.69376	0.36372
C17Cl17	-3.07787	1.5972	933	-6.34895	-4.12679	-3.06459	-1.98812	-0.0999404
C17Cl18	-3.55671	1.78621	315	-7.00974	-4.63311	-3.47254	-2.45557	0.295166
C18Cl0	-15.5021	0	198	-15.5021	-15.5021	-15.5021	-15.5021	-15.5021
C18Cl1	-14.3912	0.501948	1205	-14.579	-14.2775	-14.2775	-14.2775	-14.276
C18Cl2	-13.336	0.959038	2895	-16.249	-13.3544	-13.0529	-13.0514	-12.2088
C18Cl3	-12.1443	1.20474	4377	-15.2295	-12.1297	-11.8268	-11.4583	-10.8687
C18Cl4	-10.9591	1.44979	4951	-14.1013	-11.3141	-10.498	-9.98846	-9.26659
C18Cl5	-9.79544	1.71135	4723	-13.6267	-10.6673	-9.2537	-8.5973	-7.66108
C18Cl6	-8.59529	1.83178	4201	-12.6164	-10.0035	-8.10474	-7.22597	-6.11165
C18Cl7	-7.46773	1.92888	3595	-12.0016	-8.89131	-7.02986	-5.97174	-4.66642
C18Cl8	-6.37662	1.95258	3049	-10.8125	-7.74073	-6.06628	-4.89093	-3.31843
C18Cl9	-5.36577	1.85742	2980	-9.50483	-6.64921	-5.15479	-3.94208	-2.41427
C18Cl10	-4.62542	1.80948	3013	-8.55633	-5.82409	-4.48819	-3.24183	-1.68555
C18Cl11	-4.02107	1.75148	2401	-7.56485	-5.167	-3.98184	-2.68935	-0.992269
C18Cl12	-3.51687	1.61565	1571	-6.69089	-4.57964	-3.50741	-2.37214	-0.581298
C18Cl13	-3.00374	1.50906	1154	-6.06366	-4.05162	-2.9227	-1.94175	-0.278765
C18Cl14	-2.78816	1.43218	1640	-5.5973	-3.74115	-2.76561	-1.79509	-0.0847436
C18Cl15	-2.72038	1.45046	2313	-5.54944	-3.70336	-2.73531	-1.73508	0.0628258
C18Cl16	-2.81903	1.48938	2325	-5.81379	-3.78646	-2.81011	-1.81876	0.0697781
C18Cl17	-3.08793	1.60547	1678	-6.30833	-4.11639	-3.03682	-1.97825	0.0143433
C18Cl18	-3.35302	1.61366	903	-6.59735	-4.46723	-3.33865	-2.27732	-0.286979
C18Cl19	-3.90754	1.8437	325	-7.58566	-5.2199	-3.93122	-2.71797	-0.255577
C19Cl0	-16.7135	0	157	-16.7135	-16.7135	-16.7135	-16.7135	-16.7135
C19Cl1	-15.6546	0.636439	896	-18.685	-15.4888	-15.4888	-15.4888	-15.4874
C19Cl2	-14.5193	0.924993	2612	-17.4604	-14.5657	-14.2642	-14.2627	-13.4201
C19Cl3	-13.3499	1.19504	4011	-16.3989	-13.3411	-13.0381	-12.6696	-12.08
C19Cl4	-12.1632	1.44531	4668	-15.3292	-12.418	-11.7093	-11.2024	-10.523
C19Cl5	-10.902	1.61334	4638	-14.4036	-11.506	-10.4005	-9.79157	-8.88474
C19Cl6	-9.77599	1.84384	4105	-13.8413	-11.2248	-9.22763	-8.40238	-7.3394
C19Cl7	-8.54675	1.91407	3636	-13.1024	-9.96048	-8.08026	-7.08538	-5.81767
C19Cl8	-7.43914	2.01348	3113	-12.1349	-8.83526	-7.03722	-5.94415	-4.32056
C19Cl9	-6.43153	1.96436	2831	-10.8359	-7.78848	-6.22106	-4.95054	-3.29028
C19Cl10	-5.45624	1.93092	2804	-9.76032	-6.72222	-5.29218	-3.96887	-2.32827
C19Cl11	-4.7609	1.79704	2831	-8.68028	-5.90285	-4.67542	-3.43207	-1.69132
C19Cl12	-4.15666	1.74128	1986	-7.7195	-5.25237	-4.13677	-2.91479	-1.05177
C19Cl13	-3.70676	1.65196	1190	-6.86491	-4.82249	-3.65924	-2.5502	-0.747387
C19Cl14	-3.15563	1.48082	1136	-6.30282	-4.14894	-3.07478	-2.05806	-0.496634
C19Cl15	-2.95808	1.4619	1576	-5.87682	-3.97263	-2.91109	-1.94262	-0.272133
C19Cl16	-2.96546	1.51643	2285	-5.97197	-3.9378	-2.96478	-1.88834	-0.0740082
C19Cl17	-3.10242	1.50387	2313	-6.20198	-4.12412	-3.06797	-2.04654	-0.266022
C19Cl18	-3.3672	1.58427	1588	-6.56006	-4.44395	-3.32209	-2.2875	-0.370038
C19Cl19	-3.70705	1.70027	760	-7.08225	-4.84856	-3.7002	-2.61898	-0.161018
C19Cl20	-4.30595	1.60954	297	-7.50261	-5.31117	-4.32286	-3.19506	-1.02266
C20Cl0	-17.9248	0	147	-17.9248	-17.9248	-17.9248	-17.9248	-17.9248
C20Cl1	-16.847	0.589068	800	-19.8964	-16.7002	-16.7002	-16.7002	-16.6987
C20Cl2	-15.7245	0.921814	2196	-18.6717	-15.7771	-15.4756	-15.4741	-14.6297
C20Cl3	-14.5209	1.1262	3699	-17.4471	-14.5524	-14.2509	-13.8825	-13.3354
C20Cl4	-13.3072	1.35793	4477	-16.524	-13.5314	-12.9044	-12.4137	-11.7437
C20Cl5	-12.072	1.58604	4472	-15.7086	-12.5133	-11.5778	-11.0246	-10.1562
C20Cl6	-10.8794	1.77251	4096	-14.8115	-12.1801	-10.3553	-9.56318	-8.5925
C20Cl7	-9.66113	1.89971	3665	-14.297	-11.1138	-9.16654	-8.23815	-7.04831
C20Cl8	-8.45447	1.94812	3050	-13.1562	-9.86121	-8.03851	-6.96485	-5.57833
C20Cl9	-7.41019	2.01488	2694	-11.9926	-8.80521	-7.11336	-5.85422	-4.20252
C20Cl10	-6.44441	1.98345	2692	-10.776	-7.74202	-6.23924	-4.95791	-3.18454
C20Cl11	-5.52827	1.8704	2859	-9.59307	-6.77148	-5.35949	-4.10749	-2.34968
C20Cl12	-4.90608	1.83235	2340	-8.70404	-6.05981	-4.88988	-3.55271	-1.74237
C20Cl13	-4.36819	1.76286	1556	-8.03918	-5.53708	-4.30271	-3.06879	-1.36102
C20Cl14	-3.88395	1.57424	923	-7.18303	-4.89867	-3.80476	-2.74646	-0.997195
C20Cl15	-3.41439	1.53769	1120	-6.56901	-4.39802	-3.3668	-2.36698	-0.507607
C20Cl16	-3.21542	1.46094	1664	-6.20851	-4.19946	-3.20351	-2.20145	-0.349679
C20Cl17	-3.2362	1.52835	2296	-6.40217	-4.25106	-3.20409	-2.16415	-0.430916
C20Cl18	-3.39629	1.56954	2259	-6.67571	-4.43352	-3.35398	-2.31025	-0.405165
C20Cl19	-3.64975	1.62564	1472	-6.87326	-4.71953	-3.63721	-2.55812	-0.496804
C20Cl20	-3.98833	1.65731	714	-7.11116	-5.15213	-4.04574	-2.91202	-0.613274
C20Cl21	-4.70875	1.83437	259	-8.57084	-5.81127	-4.71903	-3.60687	-1.10131

## Sheet: dUaw
	mean	SD	n of molecules	0.025	0.25	0.5 (median)	0.75	0.975
C10Cl0	38.8757	0	1316	38.8757	38.8757	38.8757	38.8757	38.8757
C10Cl1	47.5667	0.425491	4815	47.1111	47.2533	47.2831	47.829	48.1805
C10Cl2	55.9112	0.916236	7581	53.8398	55.3731	56.2066	56.5582	57.4853
C10Cl3	63.702	1.3312	7559	61.111	62.9304	63.7253	64.6921	65.9907
C10Cl4	70.7942	1.5328	6346	67.5482	69.7427	70.9334	71.9388	73.5749
C10Cl5	77.1283	1.65687	5472	73.7824	76.0347	77.2421	78.3334	80.0998
C10Cl6	82.7465	1.87057	4498	78.8411	81.5408	82.8209	84.0225	86.4055
C10Cl7	87.5715	2.31536	3166	82.8363	86.0136	87.6112	89.2197	91.8556
C10Cl8	91.9954	2.58275	3097	86.6244	90.2606	91.9394	93.8096	96.8808
C10Cl9	96.3981	2.9486	3108	90.6673	94.3274	96.4654	98.4122	102.102
C10Cl10	100.487	3.02788	1859	94.4619	98.4884	100.533	102.644	106.105
C10Cl11	104.09	3.14406	706	98.038	102.033	104.269	106.056	110.204
C10Cl12	108.176	3.3184	126	101.737	106.102	108.229	109.889	115.8
C11Cl0	42.0411	0	1014	42.0411	42.0411	42.0411	42.0411	42.0411
C11Cl1	50.6846	0.422789	4062	50.2766	50.2766	50.4188	50.9944	51.346
C11Cl2	59.041	0.87953	6681	57.0053	58.6493	59.2299	59.5814	60.6508
C11Cl3	66.9266	1.28362	7123	64.2842	66.1776	66.96	67.9853	68.8862
C11Cl4	74.2479	1.57737	6334	71.0051	73.3238	74.3483	75.4172	77.2084
C11Cl5	80.8532	1.7065	5287	77.1988	79.7223	80.9553	82.0921	84.0135
C11Cl6	86.6934	1.89077	4727	82.7184	85.4851	86.7555	88.0024	90.244
C11Cl7	91.954	2.15619	3507	87.6541	90.5403	91.9457	93.4667	96.1182
C11Cl8	96.6198	2.53779	2635	91.4731	94.9237	96.6935	98.4062	101.633
C11Cl9	100.812	2.81663	3097	95.2871	98.8937	100.786	102.794	106.112
C11Cl10	105	3.03858	2864	99.1611	102.902	105.066	106.996	111.007
C11Cl11	108.864	3.2674	1669	102.399	106.764	108.819	111.212	115.156
C11Cl12	112.588	3.44826	620	105.534	110.422	112.703	114.879	118.933
C11Cl13	116.054	2.96943	134	110.747	113.847	115.981	118.228	121.455
C12Cl0	45.2066	0	749	45.2066	45.2066	45.2066	45.2066	45.2066
C12Cl1	53.8166	0.422076	3352	53.4421	53.4421	53.5843	54.1599	54.5114
C12Cl2	62.1557	0.856434	6067	60.1708	61.8197	62.3953	62.7469	63.4647
C12Cl3	70.1643	1.24808	6626	67.4419	69.3381	70.2094	71.1543	72.0517
C12Cl4	77.5715	1.58631	6144	74.2965	76.5793	77.6696	78.6978	80.4718
C12Cl5	84.4787	1.78787	5264	80.7792	83.3639	84.535	85.7151	87.5828
C12Cl6	90.6407	1.93444	4587	86.6742	89.3668	90.6965	91.9855	94.1898
C12Cl7	96.1275	2.09746	3872	91.9091	94.7588	96.1892	97.5746	100.044
C12Cl8	101.136	2.35843	2783	96.2608	99.6509	101.165	102.711	105.64
C12Cl9	105.434	2.71963	2402	100.115	103.599	105.455	107.296	110.521
C12Cl10	109.679	3.03626	2993	103.674	107.621	109.598	111.874	115.431
C12Cl11	113.592	3.1362	2636	107.586	111.403	113.603	115.703	119.851
C12Cl12	117.32	3.40727	1504	110.235	115.041	117.362	119.782	123.7
C12Cl13	120.765	3.53784	546	113.463	118.582	120.938	123.203	127.429
C12Cl14	124.247	3.66789	140	117.688	121.711	124.409	126.826	131.305
C13Cl0	48.3721	0	608	48.3721	48.3721	48.3721	48.3721	48.3721
C13Cl1	56.9403	0.413236	2796	56.6075	56.6075	56.7497	57.3253	57.6769
C13Cl2	65.2687	0.833715	5366	63.194	64.9852	65.467	65.9123	66.6301
C13Cl3	73.2982	1.22333	6310	70.6036	72.4915	73.389	74.29	75.2171
C13Cl4	80.9027	1.53931	6015	77.5948	79.8337	81.0137	81.9459	83.5914
C13Cl5	87.9853	1.80975	5183	84.3309	86.7647	88.1011	89.1893	91.3068
C13Cl6	94.4439	1.9351	4350	90.4544	93.2185	94.4932	95.7804	98.0156
C13Cl7	100.263	2.09222	3969	95.9016	98.8639	100.372	101.72	104.151
C13Cl8	105.538	2.37223	3230	100.682	103.971	105.593	107.108	110.153
C13Cl9	110.114	2.66766	2167	104.873	108.291	110.087	111.917	115.239
C13Cl10	114.277	2.8696	2290	108.734	112.304	114.326	116.224	120.005
C13Cl11	118.21	3.06982	2829	112.344	116.132	118.17	120.312	124.492
C13Cl12	122.104	3.34217	2454	115.751	119.81	122.085	124.311	128.609
C13Cl13	125.752	3.38138	1402	118.763	123.515	125.696	128.083	132.435
C13Cl14	129.272	3.57181	492	122.27	126.873	129.236	131.766	135.917
C13Cl15	132.83	3.59792	120	126.044	130.429	132.62	134.877	140.564
C14Cl0	51.5375	0	499	51.5375	51.5375	51.5375	51.5375	51.5375
C14Cl1	60.0798	0.403763	2359	59.773	59.773	59.9152	60.4908	60.8423
C14Cl2	68.401	0.819772	4760	66.3595	68.1457	68.5804	69.0778	69.7956
C14Cl3	76.4844	1.20276	5910	73.7785	75.6643	76.6462	77.4554	78.3826
C14Cl4	84.1719	1.54521	5851	80.7577	83.1295	84.306	85.239	86.8063
C14Cl5	91.3625	1.84042	5104	87.5248	90.0703	91.4716	92.6859	94.798
C14Cl6	98.122	2.00394	4148	93.9884	96.8679	98.2374	99.4914	101.845
C14Cl7	104.214	2.17035	3899	99.7563	102.769	104.322	105.76	108.172
C14Cl8	109.707	2.33451	3613	105.044	108.179	109.784	111.345	113.954
C14Cl9	114.696	2.53786	2568	109.605	112.975	114.741	116.404	119.582
C14Cl10	119.064	2.82217	1821	113.677	117.128	119.016	120.981	124.623
C14Cl11	123.106	3.03643	2297	117.332	120.957	123.131	125.187	129.181
C14Cl12	126.854	3.29797	2710	120.361	124.519	126.927	129.142	133.051
C14Cl13	130.659	3.39086	2365	124.003	128.357	130.706	132.923	137.321
C14Cl14	134.344	3.66946	1263	126.889	131.9	134.332	137.061	141.401
C14Cl15	137.858	3.79393	419	130.412	135.279	137.834	140.597	145.048
C14Cl16	140.632	3.66354	119	134.904	137.732	140.786	142.945	147.366
C15Cl0	54.703	0	387	54.703	54.703	54.703	54.703	54.703
C15Cl1	63.2322	0.406255	1958	62.9384	62.9384	62.9384	63.6562	64.0078
C15Cl2	71.5807	0.767101	4209	69.5249	71.3112	71.586	72.2432	72.961
C15Cl3	79.6557	1.15799	5529	76.9851	78.8297	79.831	80.5393	81.4664
C15Cl4	87.3864	1.51684	5637	84.0741	86.418	87.4786	88.531	89.9301
C15Cl5	94.7767	1.77127	4915	91.1259	93.6569	94.7869	96.0696	98.1135
C15Cl6	101.64	1.98081	4354	97.4457	100.312	101.729	103.054	105.308
C15Cl7	107.962	2.17224	3622	103.473	106.569	108.076	109.471	111.98
C15Cl8	113.834	2.28239	3465	109.255	112.33	113.899	115.414	118.06
C15Cl9	119.103	2.50138	3121	114.068	117.434	119.158	120.862	123.74
C15Cl10	123.654	2.69393	2013	118.2	121.806	123.716	125.532	128.774
C15Cl11	127.922	2.89018	1616	122.035	126.109	127.927	129.841	133.591
C15Cl12	131.771	3.10012	2322	125.787	129.593	131.797	133.871	137.843
C15Cl13	135.586	3.36345	2674	129.193	133.249	135.58	137.94	142.136
C15Cl14	139.2	3.41606	2135	132.518	136.837	139.256	141.54	145.721
C15Cl15	142.742	3.65011	1128	135.538	140.271	142.722	145.247	149.944
C15Cl16	146.154	3.48508	414	139.321	143.963	146.125	148.414	153.007
C15Cl17	148.911	3.42311	113	142.255	146.556	149.265	151.039	155.239
C16Cl0	57.8684	0	323	57.8684	57.8684	57.8684	57.8684	57.8684
C16Cl1	66.3807	0.404534	1675	66.1039	66.1039	66.1039	66.8217	67.1732
C16Cl2	74.7009	0.776211	3723	72.8326	74.3393	74.6093	75.4087	76.1265
C16Cl3	82.7889	1.1475	5182	80.1506	81.9715	82.9869	83.6441	84.6319
C16Cl4	90.6224	1.48354	5339	87.4074	89.6567	90.666	91.7781	93.0046
C16Cl5	98.0649	1.76492	4890	94.3532	96.97	98.1955	99.3131	101.254
C16Cl6	105.198	2.00139	4290	101.019	103.88	105.236	106.56	108.824
C16Cl7	111.664	2.20042	3602	107.253	110.206	111.719	113.234	115.712
C16Cl8	117.713	2.33526	3318	112.9	116.177	117.796	119.39	121.952
C16Cl9	123.135	2.48248	3287	118.11	121.551	123.211	124.837	127.742
C16Cl10	128.295	2.67649	2357	122.592	126.569	128.364	130.191	133.342
C16Cl11	132.668	2.89861	1627	126.517	130.799	132.652	134.533	138.177
C16Cl12	136.747	3.06989	1531	130.673	134.702	136.685	138.863	142.433
C16Cl13	140.359	3.32615	2286	133.652	138.135	140.439	142.583	146.769
C16Cl14	144.156	3.47777	2548	137.38	141.771	144.156	146.637	150.846
C16Cl15	147.839	3.73376	2033	140.985	145.198	147.863	150.409	155.176
C16Cl16	151.179	3.67335	1028	143.881	148.8	151.16	153.772	158.086
C16Cl17	154.63	3.91423	371	147.463	152.026	154.709	157.208	162.441
C17Cl0	61.0339	0	241	61.0339	61.0339	61.0339	61.0339	61.0339
C17Cl1	69.5144	0.385629	1449	69.2694	69.2694	69.2694	69.4413	70.3387
C17Cl2	77.8706	0.735819	3197	75.998	77.5048	77.7747	78.3648	79.292
C17Cl3	85.9591	1.10044	4814	83.6185	85.1657	86.1474	86.8096	87.6647
C17Cl4	93.8474	1.43955	5234	90.8721	92.9814	93.9301	94.973	96.1701
C17Cl5	101.432	1.7402	4786	97.7596	100.302	101.591	102.641	104.489
C17Cl6	108.588	2.02342	4176	104.39	107.323	108.705	109.954	112.169
C17Cl7	115.276	2.25655	3537	110.673	113.812	115.324	116.81	119.515
C17Cl8	121.594	2.43836	3205	116.45	119.972	121.723	123.312	126.07
C17Cl9	127.334	2.49298	3226	122.232	125.661	127.473	128.989	131.916
C17Cl10	132.63	2.68795	2913	127.247	130.895	132.672	134.404	137.874
C17Cl11	137.473	2.82973	1979	131.808	135.635	137.542	139.348	143.079
C17Cl12	141.596	2.95048	1301	135.549	139.7	141.479	143.625	147.235
C17Cl13	145.431	3.19249	1567	139.199	143.21	145.352	147.537	151.873
C17Cl14	149.129	3.40607	2274	142.438	146.809	149.115	151.392	155.866
C17Cl15	152.755	3.61499	2481	145.52	150.292	152.764	155.187	159.787
C17Cl16	156.447	3.72405	1916	149.121	153.869	156.466	159.033	163.873
C17Cl17	159.883	3.74947	933	152.367	157.227	160.062	162.619	166.603
C17Cl18	163.01	3.94981	315	155.007	160.809	163.029	165.487	171.159
C18Cl0	64.1994	0	198	64.1994	64.1994	64.1994	64.1994	64.1994
C18Cl1	72.6637	0.378854	1205	72.4348	72.4348	72.4348	72.6068	73.5042
C18Cl2	80.9648	0.736972	2895	79.0213	80.6703	80.8422	81.3881	82.1059
C18Cl3	89.135	1.08368	4377	86.8381	88.4004	89.3178	89.9751	90.9211
C18Cl4	97.009	1.4268	4951	93.9854	96.0831	97.0804	98.1385	99.2799
C18Cl5	104.662	1.7369	4723	101.029	103.472	104.837	105.885	107.653
C18Cl6	111.941	1.98711	4201	107.727	110.664	112.036	113.29	115.55
C18Cl7	118.869	2.22063	3595	114.268	117.475	118.97	120.429	123.008
C18Cl8	125.356	2.37354	3049	120.516	123.813	125.417	126.972	129.716
C18Cl9	131.274	2.54287	2980	126.078	129.607	131.372	133.041	136.012
C18Cl10	136.744	2.69965	3013	131.245	134.986	136.809	138.545	141.837
C18Cl11	141.817	2.7263	2401	136.237	140.026	141.844	143.631	147.049
C18Cl12	146.522	2.91549	1571	141.072	144.524	146.616	148.406	152.314
C18Cl13	150.455	3.09401	1154	144.44	148.27	150.473	152.64	156.374
C18Cl14	154.161	3.30329	1640	147.377	151.903	154.175	156.508	160.446
C18Cl15	157.894	3.58782	2313	151.116	155.353	157.817	160.376	164.952
C18Cl16	161.495	3.64674	2325	154.472	158.862	161.468	164.114	168.398
C18Cl17	164.794	3.84515	1678	156.996	162.198	164.68	167.368	172.309
C18Cl18	168.284	3.62118	903	161.532	165.873	168.172	170.576	175.329
C18Cl19	171.654	3.95694	325	164.017	168.963	171.699	174.391	179.417
C19Cl0	67.3648	0	157	67.3648	67.3648	67.3648	67.3648	67.3648
C19Cl1	75.8228	0.375272	896	75.6003	75.6003	75.6003	75.7722	76.6696
C19Cl2	84.1374	0.699605	2612	82.329	83.8357	84.0077	84.5535	85.2713
C19Cl3	92.298	1.05258	4011	90.0331	91.6475	92.3853	93.1405	93.9055
C19Cl4	100.211	1.3899	4668	97.2411	99.3755	100.338	101.294	102.445
C19Cl5	107.916	1.68808	4638	104.24	106.763	108.029	109.101	110.849
C19Cl6	115.3	1.99718	4105	111.145	114.011	115.409	116.74	118.968
C19Cl7	122.312	2.20502	3636	117.677	120.875	122.422	123.891	126.341
C19Cl8	128.991	2.34855	3113	124.064	127.471	129.09	130.646	133.297
C19Cl9	135.091	2.54099	2831	129.828	133.407	135.227	136.782	139.835
C19Cl10	140.941	2.6475	2804	135.563	139.182	141.006	142.781	145.918
C19Cl11	146.196	2.69608	2831	140.798	144.415	146.217	148.049	151.502
C19Cl12	150.99	2.97089	1986	145.063	149.166	151.048	153.029	156.646
C19Cl13	155.06	3.08907	1190	149.032	153.02	155.119	157.133	161.08
C19Cl14	159.295	3.32907	1136	152.772	157.103	159.184	161.551	165.737
C19Cl15	162.738	3.43586	1576	156.183	160.472	162.729	165.106	169.426
C19Cl16	166.637	3.60009	2285	159.971	164.152	166.549	169.063	173.6
C19Cl17	170.022	3.66664	2313	162.89	167.418	170.077	172.499	177.173
C19Cl18	173.569	3.78739	1588	166.359	171.056	173.623	176.127	181.03
C19Cl19	176.527	3.96592	760	168.893	173.77	176.478	179.469	183.777
C19Cl20	179.42	3.72517	297	172.33	176.961	179.202	182.18	186.532
C20Cl0	70.5303	0	147	70.5303	70.5303	70.5303	70.5303	70.5303
C20Cl1	78.9786	0.373903	800	78.7657	78.7657	78.7657	78.9079	79.8351
C20Cl2	87.302	0.705786	2196	85.4944	87.0012	87.1434	87.719	88.4368
C20Cl3	95.4481	1.02169	3699	93.5877	94.8129	95.521	96.2244	97.0238
C20Cl4	103.418	1.35644	4477	100.425	102.595	103.609	104.469	105.529
C20Cl5	111.139	1.66123	4472	107.634	109.933	111.275	112.335	113.984
C20Cl6	118.615	1.92368	4096	114.591	117.334	118.751	120.022	122.128
C20Cl7	125.723	2.20414	3665	121.092	124.301	125.794	127.275	129.684
C20Cl8	132.467	2.42265	3050	127.531	130.867	132.552	134.173	136.967
C20Cl9	138.876	2.57499	2694	133.596	137.183	138.93	140.639	143.616
C20Cl10	144.9	2.63449	2692	139.423	143.153	144.977	146.699	149.854
C20Cl11	150.324	2.82203	2859	144.594	148.524	150.407	152.275	155.572
C20Cl12	155.361	2.95658	2340	149.521	153.345	155.422	157.378	161.138
C20Cl13	160.123	3.17524	1556	153.723	157.97	160.181	162.308	166.001
C20Cl14	164.197	3.21868	923	157.949	162.061	164.198	166.333	170.579
C20Cl15	167.856	3.36909	1120	160.915	165.462	167.893	170.048	174.271
C20Cl16	171.468	3.47964	1664	164.614	169.211	171.447	173.743	178.076
C20Cl17	175.15	3.74498	2296	167.918	172.518	175.14	177.647	182.655
C20Cl18	178.563	3.7555	2259	171.395	175.92	178.581	181.162	185.929
C20Cl19	181.896	3.98016	1472	174.108	179.12	181.987	184.595	189.393
C20Cl20	185.162	3.84024	714	178.102	182.502	185.407	187.869	192.035
C20Cl21	187.958	4.42444	259	179.305	184.725	188.023	191.095	196.449

## Sheet: dUoa
	mean	SD	n of molecules	0.025	0.25	0.5 (median)	0.75	0.975
C10Cl0	-46.5608	0	1316	-46.5608	-46.5608	-46.5608	-46.5608	-46.5608
C10Cl1	-54.3386	0.843657	4815	-56.9399	-54.9183	-54.2596	-53.8293	-53.6301
C10Cl2	-61.735	1.5416	7581	-64.6386	-62.6171	-61.805	-60.7422	-58.9141
C10Cl3	-68.618	2.01501	7559	-72.3666	-69.9571	-68.6103	-67.2087	-64.6663
C10Cl4	-74.8318	2.34363	6346	-79.4836	-76.5064	-74.9724	-73.0352	-70.379
C10Cl5	-80.5391	2.51002	5472	-85.3926	-82.3027	-80.5904	-78.9231	-75.6504
C10Cl6	-85.7333	2.62182	4498	-91.0067	-87.4982	-85.782	-84.0119	-80.6455
C10Cl7	-90.0883	2.75552	3166	-95.2595	-92.092	-90.1363	-88.0584	-85.0067
C10Cl8	-94.1784	2.70936	3097	-99.3265	-96.0696	-94.083	-92.4155	-89.2122
C10Cl9	-98.4978	2.72073	3108	-103.592	-100.574	-98.296	-96.774	-93.2783
C10Cl10	-102.676	2.38377	1859	-106.974	-104.411	-102.742	-101.004	-97.9567
C10Cl11	-106.492	2.18536	706	-110.654	-107.949	-106.682	-105.006	-102.1
C10Cl12	-110.835	2.07956	126	-115.077	-112.059	-110.912	-109.665	-106.723
C11Cl0	-51.0548	0	1014	-51.0548	-51.0548	-51.0548	-51.0548	-51.0548
C11Cl1	-58.7616	0.831223	4062	-61.4339	-59.4123	-58.3233	-58.1241	-58.1241
C11Cl2	-66.1185	1.45292	6681	-69.1326	-66.6807	-66.022	-65.3408	-63.3858
C11Cl3	-72.9939	1.99149	7123	-76.8606	-74.5652	-72.9718	-71.7656	-69.0647
C11Cl4	-79.3573	2.36994	6334	-83.924	-81.0383	-79.3889	-77.7093	-74.7041
C11Cl5	-85.1351	2.53798	5287	-89.9159	-87.0893	-85.0788	-83.3539	-80.33
C11Cl6	-90.3214	2.70749	4727	-95.6657	-92.2014	-90.2899	-88.4404	-85.0362
C11Cl7	-95.1769	2.83253	3507	-100.559	-97.0885	-95.2293	-93.2101	-89.5051
C11Cl8	-99.3507	2.8822	2635	-104.76	-101.381	-99.342	-97.2978	-93.8751
C11Cl9	-103.256	2.86843	3097	-108.811	-105.276	-103.207	-101.304	-98.0861
C11Cl10	-107.42	2.71085	2864	-112.387	-109.434	-107.315	-105.559	-102.319
C11Cl11	-111.366	2.56192	1669	-116.241	-113.225	-111.342	-109.631	-106.066
C11Cl12	-115.299	2.3494	620	-119.59	-116.83	-115.426	-113.776	-110.514
C11Cl13	-119.136	1.81628	134	-122.39	-120.553	-119.238	-117.883	-115.659
C12Cl0	-55.5488	0	749	-55.5488	-55.5488	-55.5488	-55.5488	-55.5488
C12Cl1	-63.2167	0.83332	3352	-65.9279	-63.2475	-62.8172	-62.6181	-62.6181
C12Cl2	-70.5313	1.4512	6067	-73.6266	-71.1747	-70.516	-69.8347	-67.7029
C12Cl3	-77.4672	1.90617	6626	-81.3546	-78.7202	-77.4289	-76.2373	-73.3949
C12Cl4	-83.8111	2.37521	6144	-88.1691	-85.491	-83.7422	-82.2596	-79.0874
C12Cl5	-89.7807	2.5896	5264	-94.7129	-91.621	-89.8674	-87.9739	-84.8096
C12Cl6	-95.0942	2.75122	4587	-100.377	-96.9909	-95.1096	-93.1093	-89.8378
C12Cl7	-100.038	2.90167	3872	-105.778	-101.942	-99.9675	-98.0385	-94.438
C12Cl8	-104.614	2.91522	2783	-110.155	-106.639	-104.647	-102.536	-99.006
C12Cl9	-108.382	2.92356	2402	-113.992	-110.383	-108.421	-106.328	-102.929
C12Cl10	-112.447	2.97591	2993	-118.145	-114.52	-112.438	-110.429	-106.77
C12Cl11	-116.375	2.72444	2636	-121.414	-118.366	-116.373	-114.486	-111.104
C12Cl12	-120.213	2.61295	1504	-124.96	-122.075	-120.303	-118.445	-115.034
C12Cl13	-123.948	2.48288	546	-128.063	-125.688	-124.286	-122.391	-118.735
C12Cl14	-127.911	2.52536	140	-132.637	-129.61	-128.21	-126.311	-122.721
C13Cl0	-60.0428	0	608	-60.0428	-60.0428	-60.0428	-60.0428	-60.0428
C13Cl1	-67.6168	0.765719	2796	-70.4218	-67.7415	-67.3112	-67.112	-67.112
C13Cl2	-74.9247	1.39156	5366	-77.6903	-75.4695	-74.8108	-74.3287	-72.1968
C13Cl3	-81.8242	1.88834	6310	-85.6661	-83.1683	-81.7606	-80.5321	-77.8889
C13Cl4	-88.3903	2.29489	6015	-92.5299	-90.0262	-88.3986	-86.8829	-83.6432
C13Cl5	-94.4242	2.60014	5183	-99.2413	-96.303	-94.4128	-92.6441	-89.3084
C13Cl6	-99.8424	2.73798	4350	-105.193	-101.689	-99.8564	-98.0024	-94.6349
C13Cl7	-104.918	2.89994	3969	-110.683	-106.903	-104.909	-102.922	-99.3278
C13Cl8	-109.672	3.02985	3230	-115.548	-111.753	-109.533	-107.628	-103.765
C13Cl9	-113.76	3.09556	2167	-119.967	-115.882	-113.799	-111.581	-108.074
C13Cl10	-117.43	3.01974	2290	-123.484	-119.482	-117.443	-115.262	-111.878
C13Cl11	-121.242	2.95791	2829	-127.045	-123.247	-121.238	-119.127	-115.722
C13Cl12	-125.172	2.879	2454	-130.572	-127.181	-125.182	-123.161	-119.541
C13Cl13	-128.969	2.65254	1402	-133.97	-130.893	-129.072	-127.109	-123.353
C13Cl14	-132.821	2.44201	492	-137.407	-134.431	-132.999	-131.094	-127.935
C13Cl15	-136.905	2.31071	120	-141.472	-138.488	-136.608	-135.357	-132.586
C14Cl0	-64.5368	0	499	-64.5368	-64.5368	-64.5368	-64.5368	-64.5368
C14Cl1	-72.1006	0.79701	2359	-74.9158	-72.2355	-71.8052	-71.606	-71.606
C14Cl2	-79.3291	1.35656	4760	-82.1843	-79.9635	-79.3048	-78.6753	-76.6908
C14Cl3	-86.3305	1.85387	5910	-90.0111	-87.509	-86.3682	-85.0483	-82.3829
C14Cl4	-92.8604	2.29588	5851	-97.157	-94.429	-92.9956	-91.2498	-88.1195
C14Cl5	-98.9608	2.59644	5104	-103.895	-100.774	-98.9411	-97.223	-93.7738
C14Cl6	-104.647	2.7966	4148	-109.952	-106.603	-104.58	-102.743	-99.1985
C14Cl7	-109.86	2.94442	3899	-115.66	-111.836	-109.835	-107.87	-104.042
C14Cl8	-114.646	3.10359	3613	-120.825	-116.766	-114.614	-112.47	-108.656
C14Cl9	-119.077	3.09732	2568	-124.979	-121.172	-119.107	-116.91	-113.098
C14Cl10	-122.896	3.14486	1821	-129.099	-125.105	-122.909	-120.652	-116.986
C14Cl11	-126.581	3.11906	2297	-132.819	-128.65	-126.582	-124.341	-120.75
C14Cl12	-130.198	3.06945	2710	-135.873	-132.374	-130.161	-128.109	-124.49
C14Cl13	-134.02	2.91438	2365	-139.314	-136.085	-134.035	-132.012	-128.357
C14Cl14	-137.893	2.78114	1263	-142.926	-139.826	-137.953	-136.05	-132.021
C14Cl15	-141.777	2.59888	419	-146.503	-143.655	-141.901	-139.973	-136.89
C14Cl16	-144.985	2.31669	119	-148.947	-146.616	-145.167	-143.334	-140.158
C15Cl0	-69.0307	0	387	-69.0307	-69.0307	-69.0307	-69.0307	-69.0307
C15Cl1	-76.5641	0.769089	1958	-79.4098	-76.7295	-76.1	-76.1	-76.1
C15Cl2	-83.8333	1.28405	4209	-86.6783	-84.4575	-83.7987	-83.1693	-81.1848
C15Cl3	-90.8022	1.85333	5529	-94.654	-92.0029	-90.9139	-89.52	-86.8769
C15Cl4	-97.3118	2.23041	5637	-101.723	-98.7726	-97.2869	-95.7221	-92.911
C15Cl5	-103.58	2.56608	4915	-108.578	-105.378	-103.594	-101.793	-98.5984
C15Cl6	-109.325	2.77297	4354	-114.652	-111.258	-109.289	-107.457	-103.777
C15Cl7	-114.574	2.93987	3622	-120.107	-116.631	-114.623	-112.599	-108.781
C15Cl8	-119.605	3.07516	3465	-125.597	-121.664	-119.624	-117.476	-113.725
C15Cl9	-124.201	3.18248	3121	-130.216	-126.492	-124.217	-121.957	-117.967
C15Cl10	-128.287	3.24131	2013	-134.437	-130.595	-128.311	-125.966	-122.362
C15Cl11	-131.858	3.12536	1616	-137.883	-133.99	-131.745	-129.74	-125.848
C15Cl12	-135.459	3.14268	2322	-141.538	-137.646	-135.439	-133.213	-129.552
C15Cl13	-139.238	3.11938	2674	-145.231	-141.444	-139.248	-137.047	-133.075
C15Cl14	-142.973	2.96648	2135	-148.344	-145.185	-143.078	-140.874	-136.947
C15Cl15	-146.701	2.87301	1128	-152.212	-148.742	-146.856	-144.77	-140.846
C15Cl16	-150.498	2.39974	414	-155.178	-152.041	-150.488	-148.902	-145.651
C15Cl17	-153.723	2.31662	113	-158.515	-155.124	-153.842	-152.318	-148.936
C16Cl0	-73.5247	0	323	-73.5247	-73.5247	-73.5247	-73.5247	-73.5247
C16Cl1	-81.0126	0.724909	1675	-83.9038	-81.2235	-80.594	-80.594	-80.594
C16Cl2	-88.2708	1.30937	3723	-90.9731	-88.9515	-88.2927	-87.6632	-85.6565
C16Cl3	-95.2199	1.7825	5182	-98.6718	-96.2199	-95.362	-94.014	-91.3708
C16Cl4	-101.866	2.19265	5339	-106.012	-103.312	-101.898	-100.305	-97.5312
C16Cl5	-108.072	2.51847	4890	-112.804	-109.866	-108.138	-106.316	-103.077
C16Cl6	-114.066	2.76751	4290	-119.339	-116.004	-114.131	-112.142	-108.564
C16Cl7	-119.407	3.00343	3602	-125.468	-121.492	-119.425	-117.344	-113.51
C16Cl8	-124.394	3.0838	3318	-130.403	-126.494	-124.373	-122.276	-118.398
C16Cl9	-129.114	3.15476	3287	-135.255	-131.262	-129.148	-126.964	-123.017
C16Cl10	-133.697	3.28094	2357	-139.968	-136.026	-133.771	-131.352	-127.11
C16Cl11	-137.414	3.33047	1627	-144.184	-139.693	-137.382	-135.043	-131.069
C16Cl12	-140.999	3.21978	1531	-147.241	-143.332	-140.882	-138.7	-134.946
C16Cl13	-144.343	3.16916	2286	-150.502	-146.518	-144.369	-142.149	-138.138
C16Cl14	-148.116	3.16523	2548	-154.189	-150.344	-148.146	-145.896	-141.874
C16Cl15	-151.874	3.12917	2033	-157.837	-154.16	-151.805	-149.638	-145.723
C16Cl16	-155.53	2.85455	1028	-160.618	-157.611	-155.673	-153.535	-149.824
C16Cl17	-159.21	2.76247	371	-164.239	-161.184	-159.318	-157.247	-153.428
C17Cl0	-78.0187	0	241	-78.0187	-78.0187	-78.0187	-78.0187	-78.0187
C17Cl1	-85.4737	0.720742	1449	-88.3978	-85.7175	-85.088	-85.088	-85.088
C17Cl2	-92.7436	1.23921	3197	-95.467	-93.4454	-92.7867	-92.1572	-90.1505
C17Cl3	-99.6788	1.71501	4814	-103.166	-100.714	-99.7962	-98.5303	-96.4212
C17Cl4	-106.357	2.13113	5234	-110.403	-107.783	-106.417	-104.983	-102.371
C17Cl5	-112.725	2.49804	4786	-117.483	-114.455	-112.771	-110.983	-107.874
C17Cl6	-118.661	2.82337	4176	-124.104	-120.587	-118.702	-116.71	-113.041
C17Cl7	-124.233	3.03647	3537	-129.985	-126.329	-124.318	-122.099	-118.268
C17Cl8	-129.458	3.19276	3205	-135.439	-131.711	-129.557	-127.311	-123.018
C17Cl9	-134.24	3.20315	3226	-140.472	-136.406	-134.222	-132.077	-127.992
C17Cl10	-138.761	3.33007	2913	-145.304	-141.06	-138.742	-136.533	-132.235
C17Cl11	-143.037	3.32974	1979	-149.678	-145.378	-143.038	-140.744	-136.639
C17Cl12	-146.614	3.29025	1301	-153.06	-148.876	-146.469	-144.265	-140.282
C17Cl13	-149.903	3.26562	1567	-156.206	-152.115	-149.81	-147.599	-143.907
C17Cl14	-153.436	3.2375	2274	-159.852	-155.595	-153.376	-151.278	-147.211
C17Cl15	-157.069	3.29891	2481	-163.376	-159.33	-157.066	-154.805	-150.615
C17Cl16	-160.782	3.15336	1916	-166.599	-163.094	-160.774	-158.535	-154.74
C17Cl17	-164.497	2.93035	933	-169.65	-166.619	-164.596	-162.448	-158.643
C17Cl18	-168.023	2.71052	315	-172.718	-169.839	-168.207	-166.542	-161.938
C18Cl0	-82.5127	0	198	-82.5127	-82.5127	-82.5127	-82.5127	-82.5127
C18Cl1	-89.9093	0.638175	1205	-90.8702	-90.2114	-89.5819	-89.5819	-89.5819
C18Cl2	-97.1759	1.2534	2895	-99.961	-97.9394	-97.0496	-96.6512	-94.6445
C18Cl3	-104.146	1.68008	4377	-107.66	-105.009	-104.23	-103.024	-100.991
C18Cl4	-110.8	2.06623	4951	-114.775	-112.225	-110.884	-109.445	-106.821
C18Cl5	-117.243	2.45377	4723	-121.876	-118.927	-117.279	-115.581	-112.555
C18Cl6	-123.26	2.73992	4201	-128.493	-125.197	-123.301	-121.348	-117.921
C18Cl7	-128.983	2.96446	3595	-134.849	-130.973	-128.985	-126.972	-123.261
C18Cl8	-134.288	3.15836	3049	-140.326	-136.49	-134.277	-132.18	-128.075
C18Cl9	-139.104	3.25684	2980	-145.597	-141.394	-139.069	-136.825	-132.993
C18Cl10	-143.744	3.38707	3013	-150.518	-146.04	-143.686	-141.431	-137.276
C18Cl11	-148.112	3.27647	2401	-154.844	-150.334	-148.089	-145.77	-141.923
C18Cl12	-152.21	3.38544	1571	-159.03	-154.588	-152.114	-149.867	-145.715
C18Cl13	-155.525	3.40199	1154	-162.511	-157.922	-155.395	-153.028	-149.36
C18Cl14	-158.886	3.33462	1640	-165.321	-161.225	-158.854	-156.438	-152.641
C18Cl15	-162.472	3.36792	2313	-169.082	-164.776	-162.34	-160.192	-156.089
C18Cl16	-166.062	3.22657	2325	-172.121	-168.352	-166.094	-163.805	-159.638
C18Cl17	-169.555	3.25536	1678	-175.585	-171.914	-169.551	-167.339	-162.874
C18Cl18	-173.267	2.82642	903	-178.641	-175.254	-173.352	-171.202	-167.901
C18Cl19	-177.069	2.74297	325	-183.029	-178.832	-177.189	-175.276	-171.733
C19Cl0	-87.0067	0	157	-87.0067	-87.0067	-87.0067	-87.0067	-87.0067
C19Cl1	-94.4483	0.741572	896	-97.3857	-94.7054	-94.0759	-94.0759	-94.0759
C19Cl2	-101.652	1.21082	2612	-104.455	-102.433	-101.344	-101.145	-99.1385
C19Cl3	-108.636	1.64627	4011	-112.154	-109.503	-108.724	-107.635	-105.629
C19Cl4	-115.336	2.08804	4668	-119.4	-116.73	-115.422	-113.971	-111.315
C19Cl5	-121.734	2.40114	4638	-126.257	-123.421	-121.69	-120.123	-117.007
C19Cl6	-127.932	2.78389	4105	-133.235	-129.904	-127.898	-126.086	-122.506
C19Cl7	-133.635	2.97965	3636	-139.225	-135.711	-133.604	-131.637	-127.826
C19Cl8	-139.134	3.12938	3113	-145.437	-141.196	-139.137	-136.968	-133.051
C19Cl9	-144.126	3.24159	2831	-150.441	-146.364	-144.238	-141.923	-137.682
C19Cl10	-148.914	3.32707	2804	-155.681	-151.077	-148.879	-146.667	-142.495
C19Cl11	-153.376	3.31105	2831	-159.878	-155.688	-153.361	-151.058	-147.001
C19Cl12	-157.472	3.48607	1986	-164.246	-159.907	-157.434	-154.977	-150.674
C19Cl13	-160.982	3.47076	1190	-167.811	-163.311	-161.106	-158.559	-154.033
C19Cl14	-164.55	3.47421	1136	-171.57	-167.005	-164.358	-161.927	-158.175
C19Cl15	-167.699	3.38734	1576	-174.039	-170.002	-167.734	-165.287	-161.276
C19Cl16	-171.491	3.39796	2285	-177.915	-173.859	-171.452	-169.069	-165.128
C19Cl17	-174.921	3.2756	2313	-181.225	-177.228	-175.043	-172.668	-168.456
C19Cl18	-178.645	3.13533	1588	-184.681	-180.828	-178.719	-176.522	-172.496
C19Cl19	-181.906	2.96148	760	-187.148	-184.095	-181.963	-179.927	-176.071
C19Cl20	-185.342	2.8846	297	-190.935	-187.358	-185.424	-183.345	-179.984
C20Cl0	-91.5006	0	147	-91.5006	-91.5006	-91.5006	-91.5006	-91.5006
C20Cl1	-98.9155	0.706544	800	-101.88	-98.7691	-98.5699	-98.5699	-98.5699
C20Cl2	-106.139	1.19897	2196	-108.949	-106.927	-105.838	-105.639	-103.632
C20Cl3	-113.082	1.61568	3699	-116.467	-113.997	-113.185	-112.129	-110.211
C20Cl4	-119.811	2.02509	4477	-123.717	-121.103	-119.821	-118.446	-115.906
C20Cl5	-126.257	2.37884	4472	-130.714	-127.891	-126.286	-124.62	-121.54
C20Cl6	-132.486	2.67815	4096	-137.73	-134.296	-132.444	-130.704	-127.304
C20Cl7	-138.298	2.95258	3665	-144.101	-140.326	-138.25	-136.227	-132.502
C20Cl8	-143.761	3.17923	3050	-150.02	-145.899	-143.764	-141.587	-137.646
C20Cl9	-149.028	3.29204	2694	-155.38	-151.334	-149.006	-146.845	-142.553
C20Cl10	-154	3.33141	2692	-160.452	-156.23	-153.92	-151.784	-147.471
C20Cl11	-158.411	3.49592	2859	-165.097	-160.828	-158.483	-155.968	-151.375
C20Cl12	-162.735	3.53696	2340	-169.481	-165.105	-162.632	-160.338	-155.735
C20Cl13	-166.859	3.59599	1556	-173.934	-169.354	-166.953	-164.264	-159.933
C20Cl14	-170.347	3.51828	923	-177.149	-172.75	-170.243	-167.883	-163.438
C20Cl15	-173.399	3.48123	1120	-180.173	-175.866	-173.347	-170.866	-166.705
C20Cl16	-176.724	3.39284	1664	-183.196	-179.114	-176.708	-174.316	-170.193
C20Cl17	-180.328	3.44196	2296	-186.911	-182.725	-180.291	-177.947	-173.657
C20Cl18	-183.791	3.25835	2259	-190.088	-186.182	-183.758	-181.566	-177.527
C20Cl19	-187.316	3.28199	1472	-193.597	-189.652	-187.423	-185.062	-180.903
C20Cl20	-190.849	3.01212	714	-196.177	-192.932	-191.079	-188.79	-184.758
C20Cl21	-194.324	3.08446	259	-200.153	-196.335	-194.507	-192.634	-187.803

## Sheet: dHvap
	mean	SD	n of molecules	0.025	0.25	0.5 (median)	0.75	0.975
C10Cl0	49.9387	0	1316	49.9387	49.9387	49.9387	49.9387	49.9387
C10Cl1	59.0528	1.05608	4815	58.2652	58.2652	58.8273	60.0362	62.0171
C10Cl2	67.5526	2.00083	7581	64.0578	66.0518	67.5894	68.9248	70.9057
C10Cl3	75.1986	2.69468	7559	69.583	73.4617	75.4185	77.0116	80.4411
C10Cl4	81.7204	3.15913	6346	75.4444	79.5032	82.0273	83.7773	87.3842
C10Cl5	87.2296	3.28401	5472	80.5582	85.0135	87.247	89.513	93.3777
C10Cl6	91.752	3.24377	4498	85.4996	89.4643	91.7532	93.9396	98.103
C10Cl7	95.2486	3.06827	3166	89.8387	92.8935	95.3203	97.2468	101.189
C10Cl8	98.5761	2.77409	3097	93.5565	96.7127	98.4673	100.472	103.954
C10Cl9	102.407	2.5923	3108	97.2795	100.696	102.133	104.539	107.127
C10Cl10	106.206	2.22718	1859	101.679	104.708	106.278	107.875	110.159
C10Cl11	109.864	1.99778	706	105.716	108.418	110.111	111.241	113.601
C10Cl12	113.986	1.9458	126	110.094	112.634	114.129	115.217	117.72
C11Cl0	54.6149	0	1014	54.6149	54.6149	54.6149	54.6149	54.6149
C11Cl1	63.6463	1.03093	4062	62.9414	62.9414	62.9414	64.7124	66.6933
C11Cl2	72.1179	1.89075	6681	68.734	70.8183	71.8542	73.0389	75.5819
C11Cl3	79.8051	2.64683	7123	74.3408	78.1647	79.7069	81.8509	85.1173
C11Cl4	86.5874	3.17934	6334	80.1334	84.4616	86.6822	88.8149	92.5509
C11Cl5	92.3823	3.36805	5287	85.5346	90.2181	92.4433	94.7072	98.8394
C11Cl6	97.0751	3.46932	4727	90.1474	94.711	97.1203	99.5297	103.698
C11Cl7	101.156	3.36618	3507	94.5905	98.6819	101.23	103.431	107.636
C11Cl8	104.494	3.13202	2635	98.8104	102.156	104.545	106.587	110.473
C11Cl9	107.715	2.86788	3097	102.478	105.761	107.516	109.749	113.2
C11Cl10	111.381	2.56817	2864	106.47	109.678	111.241	113.327	115.989
C11Cl11	115.034	2.37468	1669	110.049	113.496	115.103	116.701	119.424
C11Cl12	118.743	2.12203	620	114.37	117.224	118.908	120.195	122.721
C11Cl13	122.526	1.60416	134	119.305	121.471	122.681	123.539	125.287
C12Cl0	59.2912	0	749	59.2912	59.2912	59.2912	59.2912	59.2912
C12Cl1	68.2828	1.02684	3352	67.6177	67.6177	67.6177	68.1798	71.3696
C12Cl2	76.7222	1.86475	6067	73.4103	75.4946	76.5063	77.7152	80.2582
C12Cl3	84.523	2.52804	6626	79.2029	82.8639	84.3832	86.4773	89.7936
C12Cl4	91.3727	3.17626	6144	84.9508	89.4595	91.3211	93.7105	97.3482
C12Cl5	97.5093	3.42907	5264	90.6208	95.236	97.5913	99.9267	103.863
C12Cl6	102.535	3.56039	4587	95.5369	100.108	102.6	104.93	109.092
C12Cl7	106.819	3.59313	3872	99.5899	104.447	106.828	109.273	113.856
C12Cl8	110.571	3.37679	2783	104.041	108.146	110.606	112.817	117.154
C12Cl9	113.501	3.07057	2402	108.016	111.372	113.469	115.511	119.642
C12Cl10	116.946	2.94837	2993	111.368	115.037	116.837	119.078	122.392
C12Cl11	120.437	2.58026	2636	115.45	118.628	120.391	122.363	125.148
C12Cl12	123.986	2.4127	1504	119.086	122.306	124.177	125.732	128.33
C12Cl13	127.608	2.26453	546	122.951	126.079	127.794	129.221	131.437
C12Cl14	131.546	2.30376	140	126.557	130.292	131.556	133.091	135.721
C13Cl0	63.9675	0	608	63.9675	63.9675	63.9675	63.9675	63.9675
C13Cl1	72.8502	0.944903	2796	72.2939	72.2939	72.2939	72.8561	76.0459
C13Cl2	81.2945	1.77767	5366	78.0866	80.2025	81.1826	82.3914	84.3723
C13Cl3	89.102	2.47701	6310	84.1739	87.4516	88.9372	91.1535	93.6966
C13Cl4	96.2875	3.03727	6015	90.1852	94.4155	96.2709	98.5045	101.939
C13Cl5	102.588	3.4621	5183	95.6056	100.257	102.568	105.047	109.224
C13Cl6	107.875	3.56833	4350	100.681	105.56	107.973	110.355	114.597
C13Cl7	112.454	3.65899	3969	105.277	110.004	112.489	114.99	119.331
C13Cl8	116.436	3.61424	3230	109.272	114.004	116.406	118.958	123.318
C13Cl9	119.694	3.44069	2167	113.535	117.113	119.744	121.953	126.661
C13Cl10	122.553	3.11853	2290	116.984	120.355	122.554	124.617	128.826
C13Cl11	125.809	2.90783	2829	120.486	123.89	125.599	127.864	131.489
C13Cl12	129.315	2.71638	2454	124.002	127.488	129.287	131.319	134.383
C13Cl13	132.858	2.4568	1402	127.892	131.191	132.895	134.621	137.249
C13Cl14	136.508	2.3096	492	131.932	134.992	136.661	138.007	140.79
C13Cl15	140.653	2.01131	120	137.138	139.401	140.761	141.962	144.421
C14Cl0	68.6437	0	499	68.6437	68.6437	68.6437	68.6437	68.6437
C14Cl1	77.5153	0.968549	2359	76.9702	76.9702	76.9702	77.5323	80.7221
C14Cl2	85.8805	1.72293	4760	82.7628	85.2967	85.8588	87.0677	89.0486
C14Cl3	93.8357	2.42888	5910	88.8687	92.1278	93.7357	95.4034	98.3253
C14Cl4	101.04	3.04201	5851	94.8906	98.9979	101.082	103.181	106.634
C14Cl5	107.475	3.444	5104	100.409	105.163	107.446	109.871	114.031
C14Cl6	113.202	3.69616	4148	105.728	110.688	113.264	115.732	120.182
C14Cl7	118.106	3.76046	3899	110.609	115.57	118.204	120.639	125.283
C14Cl8	122.215	3.81484	3613	114.778	119.625	122.166	124.815	129.797
C14Cl9	125.813	3.61028	2568	118.603	123.289	125.888	128.255	132.64
C14Cl10	128.788	3.4368	1821	122.641	126.218	128.822	131.118	135.574
C14Cl11	131.731	3.16859	2297	125.924	129.485	131.642	133.857	138.051
C14Cl12	134.775	2.97625	2710	129.126	132.778	134.665	137.009	140.338
C14Cl13	138.247	2.7536	2365	132.824	136.393	138.188	140.229	143.376
C14Cl14	141.902	2.54026	1263	136.419	140.251	142.013	143.662	146.843
C14Cl15	145.622	2.31145	419	141.186	144.044	145.748	147.186	149.725
C14Cl16	148.867	2.03267	119	144.632	147.469	149.021	150.397	152.302
C15Cl0	73.32	0	387	73.32	73.32	73.32	73.32	73.32
C15Cl1	82.1638	0.941405	1958	81.6465	81.6465	81.6465	82.2086	85.3984
C15Cl2	90.5905	1.63484	4209	87.4391	89.973	90.5351	91.744	93.7249
C15Cl3	98.5155	2.4128	5529	93.545	96.8041	98.5751	100.07	103.049
C15Cl4	105.748	2.94405	5637	99.805	103.674	105.816	107.826	111.317
C15Cl5	112.451	3.40662	4915	105.692	110.082	112.587	114.785	118.828
C15Cl6	118.332	3.6541	4354	110.992	115.915	118.421	120.941	125.132
C15Cl7	123.38	3.82098	3622	115.476	120.849	123.481	126.087	130.482
C15Cl8	127.949	3.88904	3465	120.206	125.303	127.998	130.622	135.444
C15Cl9	131.767	3.84294	3121	124.248	129.027	131.88	134.482	139.017
C15Cl10	134.978	3.71359	2013	127.881	132.307	134.992	137.652	141.875
C15Cl11	137.684	3.3592	1616	131.716	135.226	137.565	139.847	144.223
C15Cl12	140.62	3.17944	2322	134.827	138.35	140.542	142.86	146.785
C15Cl13	143.913	2.99547	2674	138.151	141.861	143.919	146.02	149.572
C15Cl14	147.312	2.8025	2135	141.667	145.25	147.446	149.37	152.317
C15Cl15	150.804	2.64486	1128	145.609	149.016	150.936	152.627	155.835
C15Cl16	154.482	2.1727	414	150.44	152.971	154.496	155.906	158.802
C15Cl17	157.683	2.27849	113	153.553	156.065	157.599	159.369	161.944
C16Cl0	77.9963	0	323	77.9963	77.9963	77.9963	77.9963	77.9963
C16Cl1	86.7943	0.890758	1675	86.3227	86.3227	86.3227	86.8849	90.0747
C16Cl2	95.2157	1.66208	3723	92.1154	94.6492	95.2114	96.4202	98.4011
C16Cl3	103.139	2.31022	5182	98.2392	101.455	103.251	104.747	107.29
C16Cl4	110.542	2.90271	5339	104.833	108.537	110.641	112.529	115.986
C16Cl5	117.251	3.34766	4890	110.498	114.978	117.419	119.583	123.367
C16Cl6	123.502	3.65324	4290	116.084	121.041	123.575	126.104	130.42
C16Cl7	128.775	3.92453	3602	121.014	126.194	128.826	131.387	136.407
C16Cl8	133.383	3.91764	3318	125.711	130.747	133.427	136.033	140.941
C16Cl9	137.464	3.87509	3287	129.951	134.872	137.55	140.115	144.898
C16Cl10	141.258	3.88719	2357	133.306	138.448	141.437	143.972	148.555
C16Cl11	144.048	3.72389	1627	137.034	141.291	144.13	146.657	151.554
C16Cl12	146.877	3.3875	1531	140.814	144.382	146.795	149.235	153.628
C16Cl13	149.546	3.10068	2286	143.615	147.446	149.482	151.672	155.738
C16Cl14	152.861	3.04281	2548	146.861	150.773	152.829	155.059	158.75
C16Cl15	156.288	2.9406	2033	150.513	154.188	156.316	158.419	161.833
C16Cl16	159.705	2.66104	1028	154.421	157.875	159.87	161.612	164.455
C16Cl17	163.256	2.50511	371	158.408	161.524	163.372	165.077	167.702
C17Cl0	82.6725	0	241	82.6725	82.6725	82.6725	82.6725	82.6725
C17Cl1	91.4275	0.877357	1449	90.999	90.999	90.999	91.5611	94.7509
C17Cl2	99.8693	1.58251	3197	96.7916	99.3255	99.7611	101.097	103.077
C17Cl3	107.793	2.22441	4814	103.211	106.157	107.855	109.423	111.966
C17Cl4	115.283	2.79036	5234	109.972	113.34	115.407	117.197	120.535
C17Cl5	122.24	3.30832	4786	115.702	119.991	122.269	124.551	128.643
C17Cl6	128.486	3.7095	4176	121.025	125.934	128.602	130.986	135.476
C17Cl7	134.072	3.98303	3537	126.119	131.35	134.211	136.867	141.441
C17Cl8	139.079	4.08569	3205	130.869	136.408	139.237	141.982	146.496
C17Cl9	143.35	3.99057	3226	135.42	140.665	143.458	146.071	150.908
C17Cl10	147.119	4.03934	2913	139.16	144.361	147.242	149.973	154.763
C17Cl11	150.503	3.83122	1979	143.143	147.886	150.583	153.272	157.977
C17Cl12	153.282	3.57603	1301	146.711	150.661	153.13	155.72	160.485
C17Cl13	155.767	3.35377	1567	149.711	153.293	155.656	158.04	162.445
C17Cl14	158.699	3.18594	2274	152.611	156.589	158.575	160.825	164.975
C17Cl15	161.909	3.15414	2481	155.8	159.743	161.845	164.208	167.906
C17Cl16	165.324	2.93502	1916	159.463	163.119	165.327	167.519	170.729
C17Cl17	168.807	2.73387	933	163.237	166.993	168.914	170.798	173.83
C17Cl18	172.314	2.40753	315	167.27	170.869	172.422	174.017	176.67
C18Cl0	87.3488	0	198	87.3488	87.3488	87.3488	87.3488	87.3488
C18Cl1	96.0386	0.783647	1205	95.6753	95.6753	95.6753	96.2374	97.4463
C18Cl2	104.493	1.56216	2895	101.468	104.002	104.002	105.773	107.754
C18Cl3	112.471	2.16591	4377	108.025	110.833	112.604	114.099	116.642
C18Cl4	119.957	2.71952	4951	114.555	118.116	120.11	121.873	124.993
C18Cl5	127.038	3.22169	4723	120.739	124.847	127.036	129.317	133.13
C18Cl6	133.434	3.63392	4201	126.102	130.994	133.458	136.047	140.226
C18Cl7	139.313	3.89107	3595	131.572	136.631	139.344	141.988	146.709
C18Cl8	144.479	4.08205	3049	136.402	141.757	144.536	147.367	152.226
C18Cl9	148.892	4.1052	2980	141.053	146.081	148.927	151.724	156.805
C18Cl10	152.912	4.1523	3013	144.881	150.168	152.916	155.831	160.879
C18Cl11	156.472	3.90034	2401	149.161	153.76	156.483	159.13	164.337
C18Cl12	159.667	3.83182	1571	152.461	157.145	159.583	162.319	167.343
C18Cl13	162.119	3.6668	1154	155.337	159.417	162.081	164.678	169.446
C18Cl14	164.737	3.42659	1640	158.577	162.141	164.672	167.145	171.208
C18Cl15	167.79	3.30952	2313	161.52	165.489	167.67	169.996	174.197
C18Cl16	170.949	3.08072	2325	164.817	168.855	171.004	173.157	176.574
C18Cl17	174.207	3.05204	1678	168.038	172.144	174.241	176.428	179.797
C18Cl18	177.657	2.66521	903	172.828	175.761	177.673	179.581	182.644
C18Cl19	181.369	2.62421	325	176.228	179.598	181.478	183.212	186.776
C19Cl0	92.025	0	157	92.025	92.025	92.025	92.025	92.025
C19Cl1	100.769	0.892577	896	100.352	100.352	100.352	100.914	104.103
C19Cl2	109.137	1.52312	2612	106.144	108.678	108.678	110.449	112.43
C19Cl3	117.157	2.12198	4011	112.701	115.509	117.149	118.776	121.319
C19Cl4	124.735	2.72525	4668	119.409	122.896	124.881	126.562	129.874
C19Cl5	131.793	3.16789	4638	125.449	129.695	131.713	134.082	137.685
C19Cl6	138.451	3.67883	4105	130.921	136.065	138.487	140.985	145.608
C19Cl7	144.332	3.89889	3636	136.358	141.76	144.421	147.05	151.784
C19Cl8	149.81	4.06222	3113	141.939	147.035	149.861	152.497	157.766
C19Cl9	154.554	4.16262	2831	146.064	151.672	154.712	157.524	162.41
C19Cl10	158.846	4.11733	2804	150.664	156.146	158.885	161.515	167.2
C19Cl11	162.509	4.0214	2831	154.539	159.826	162.6	165.334	170.174
C19Cl12	165.741	4.03414	1986	157.902	162.973	165.734	168.556	173.406
C19Cl13	168.358	3.85081	1190	160.572	165.679	168.481	170.917	175.987
C19Cl14	171.106	3.65215	1136	164.698	168.344	170.928	173.641	178.463
C19Cl15	173.645	3.45909	1576	167.144	171.115	173.71	176.058	180.343
C19Cl16	176.853	3.34922	2285	170.772	174.432	176.772	179.206	183.24
C19Cl17	179.898	3.12884	2313	173.924	177.757	179.873	182.122	185.854
C19Cl18	183.366	2.95069	1588	177.326	181.271	183.431	185.395	188.936
C19Cl19	186.489	2.70442	760	180.955	184.683	186.486	188.371	191.498
C19Cl20	189.797	2.67202	297	184.91	188.013	189.859	191.615	194.993
C20Cl0	96.7013	0	147	96.7013	96.7013	96.7013	96.7013	96.7013
C20Cl1	105.418	0.857716	800	105.028	105.028	105.028	105.028	108.78
C20Cl2	113.822	1.49963	2196	110.82	113.354	113.354	115.125	117.106
C20Cl3	121.811	2.07351	3699	117.488	120.185	121.956	123.452	125.868
C20Cl4	129.427	2.64595	4477	124.296	127.899	129.467	131.225	134.321
C20Cl5	136.571	3.15535	4472	130.36	134.527	136.591	138.691	142.553
C20Cl6	143.315	3.55446	4096	136.202	140.928	143.295	145.789	150.176
C20Cl7	149.385	3.88404	3665	141.696	146.782	149.38	152.093	156.787
C20Cl8	154.872	4.16284	3050	146.621	152.072	154.907	157.587	163.018
C20Cl9	160.042	4.20477	2694	151.64	157.237	160.066	162.911	168.13
C20Cl10	164.612	4.20954	2692	156.402	161.763	164.628	167.562	172.457
C20Cl11	168.346	4.28893	2859	159.659	165.476	168.488	171.301	176.412
C20Cl12	171.863	4.21496	2340	163.371	168.979	171.883	174.777	179.792
C20Cl13	175.106	4.12295	1556	167.261	172.236	175.163	177.957	183.025
C20Cl14	177.76	3.83816	923	170.263	175.09	177.602	180.36	185.203
C20Cl15	180.009	3.57201	1120	173.46	177.433	179.912	182.45	186.987
C20Cl16	182.659	3.3818	1664	176.158	180.345	182.561	185.003	189.116
C20Cl17	185.768	3.35315	2296	179.212	183.445	185.687	188.064	192.284
C20Cl18	188.889	3.11309	2259	182.966	186.749	188.881	191.085	194.95
C20Cl19	192.184	3.041	1472	186.321	190.012	192.179	194.32	198.079
C20Cl20	195.498	2.82515	714	189.761	193.563	195.632	197.546	200.621
C20Cl21	198.841	2.72384	259	193.129	197.122	198.969	200.68	203.855

## Sheet: dHdiss
	mean	SD	n of molecules	0.025	0.25	0.5 (median)	0.75	0.975
C10Cl0	8.56166	0	1316	8.56166	8.56166	8.56166	8.56166	8.56166
C10Cl1	9.0233	0.919115	4815	8.58078	8.58078	8.59427	9.44019	12.1925
C10Cl2	9.21528	1.68091	7581	6.44668	7.99576	8.84168	9.47281	12.2251
C10Cl3	9.08912	2.2414	7559	5.5904	7.40603	8.70567	10.5385	13.0902
C10Cl4	8.52931	2.58256	6346	3.8119	6.65238	8.33544	10.1192	13.7892
C10Cl5	7.7123	2.57434	5472	3.59926	6.01151	7.37166	9.65434	13.4177
C10Cl6	6.63246	2.30806	4498	2.38946	4.79814	6.73125	8.07974	11.4747
C10Cl7	5.3079	1.83293	3166	2.1626	4.01727	5.06305	6.46321	9.13608
C10Cl8	4.18189	1.5735	3097	1.36437	3.09419	4.13401	5.15392	7.39188
C10Cl9	3.5624	1.59148	3108	0.669789	2.46627	3.51673	4.5092	7.04329
C10Cl10	3.19927	1.90219	1859	-0.22765	1.94793	3.01493	4.39982	7.36612
C10Cl11	3.22982	2.16823	706	-0.710017	1.73639	3.17881	4.50631	7.68896
C10Cl12	3.22178	2.3367	126	-1.89434	1.77008	3.28642	4.90551	6.98936
C11Cl0	10.0758	0	1014	10.0758	10.0758	10.0758	10.0758	10.0758
C11Cl1	10.4917	0.889208	4062	10.095	10.095	10.095	10.9544	13.7067
C11Cl2	10.6345	1.56583	6681	7.96085	10.1141	10.3282	10.9735	13.7393
C11Cl3	10.4554	2.16925	7123	7.10795	8.83939	10.212	11.6172	14.6044
C11Cl4	9.92308	2.52555	6334	5.43167	8.13063	9.64098	11.4783	14.6648
C11Cl5	9.13028	2.6298	5287	4.39374	7.0542	8.99718	10.9715	14.7106
C11Cl6	8.00116	2.50034	4727	3.81926	6.38219	7.60227	9.88035	13.6135
C11Cl7	6.83249	2.23111	3507	2.9435	4.96458	6.9701	8.09406	11.302
C11Cl8	5.48956	1.81496	2635	2.38431	4.22867	5.28484	6.76892	9.24142
C11Cl9	4.49539	1.61521	3097	1.75895	3.33982	4.36517	5.55582	7.79063
C11Cl10	3.90943	1.73557	2864	0.814808	2.73098	3.7923	4.96677	7.73765
C11Cl11	3.63746	1.90443	1669	0.0947249	2.37361	3.49291	4.85	7.56989
C11Cl12	3.5899	2.29285	620	-0.57512	1.94505	3.62594	5.04642	8.301
C11Cl13	3.91944	2.34622	134	-1.19825	2.10636	4.00878	5.62959	7.55179
C12Cl0	11.59	0	749	11.59	11.59	11.59	11.59	11.59
C12Cl1	11.9908	0.881205	3352	11.6091	11.6091	11.6091	11.6226	15.2209
C12Cl2	12.1104	1.53524	6067	9.47503	11.6283	11.8289	12.4877	15.2535
C12Cl3	11.9171	2.05168	6626	8.68608	10.4344	11.7205	12.8534	16.1185
C12Cl4	11.3746	2.51061	6144	7.01317	9.57749	11.0503	13.0732	16.3383
C12Cl5	10.6114	2.66842	5264	5.96048	8.664	10.4441	12.3109	16.4307
C12Cl6	9.49191	2.61683	4587	4.98963	7.5098	9.2606	11.4691	15.3541
C12Cl7	8.30784	2.46569	3872	3.87712	6.63938	7.97574	9.96855	13.4501
C12Cl8	7.06964	2.11301	2783	3.47696	5.45402	7.06481	8.34184	11.1486
C12Cl9	5.69643	1.74247	2402	2.62028	4.42148	5.5712	6.8571	9.37019
C12Cl10	4.85483	1.67431	2993	1.90589	3.64985	4.77671	5.94244	8.49913
C12Cl11	4.36747	1.82583	2636	0.933042	3.13686	4.24848	5.51924	8.38029
C12Cl12	4.13245	2.08983	1504	0.296913	2.72144	4.09797	5.45995	8.66707
C12Cl13	4.28106	2.40018	546	-0.567763	2.71758	4.33203	5.79405	8.99652
C12Cl14	4.70235	2.51745	140	-0.112725	2.99672	4.42776	6.94005	9.04998
C13Cl0	13.1042	0	608	13.1042	13.1042	13.1042	13.1042	13.1042
C13Cl1	13.4289	0.784505	2796	13.1233	13.1233	13.1233	13.1368	16.7351
C13Cl2	13.5586	1.44629	5366	10.9892	13.1424	13.1559	14.0018	16.7542
C13Cl3	13.3523	1.97494	6310	10.2137	11.9486	13.2347	14.2216	17.6327
C13Cl4	12.9428	2.39165	6015	8.96853	11.2692	12.6362	14.4825	17.6518
C13Cl5	12.1722	2.6546	5183	7.66382	10.2489	11.923	13.8677	17.7596
C13Cl6	11.0127	2.62279	4350	6.26397	9.03494	10.9284	12.6899	16.7265
C13Cl7	9.79114	2.60137	3969	5.28216	8.14017	9.45233	11.693	15.3951
C13Cl8	8.53247	2.3713	3230	4.02749	6.72294	8.63794	10.0073	13.3813
C13Cl9	7.20752	1.9509	2167	3.67634	5.86149	7.11095	8.48804	11.1168
C13Cl10	5.90422	1.77828	2290	2.77259	4.60188	5.79617	7.09762	9.52655
C13Cl11	5.16947	1.73403	2829	2.1038	3.93189	5.05628	6.2481	8.92144
C13Cl12	4.73053	1.91055	2454	1.36122	3.37533	4.6306	5.97635	8.79307
C13Cl13	4.55732	2.12227	1402	0.832411	3.07634	4.41622	5.94943	9.15142
C13Cl14	4.67204	2.47405	492	0.0875656	2.94082	4.67845	6.37336	9.42064
C13Cl15	5.23826	2.64385	120	0.23064	3.62853	5.02183	7.20945	10.4961
C14Cl0	14.6184	0	499	14.6184	14.6184	14.6184	14.6184	14.6184
C14Cl1	14.9508	0.826777	2359	14.6375	14.6375	14.6375	14.651	18.2492
C14Cl2	15.0053	1.37305	4760	12.5034	14.6566	14.6701	15.516	18.2684
C14Cl3	14.8854	1.92091	5910	11.7279	13.6171	14.7489	15.7358	18.9876
C14Cl4	14.4105	2.3746	5851	10.4727	12.7557	14.1426	15.9009	19.166
C14Cl5	13.6624	2.60146	5104	9.26335	11.8473	13.3918	15.3818	19.0504
C14Cl6	12.6505	2.70958	4148	7.92754	10.7111	12.5492	14.3494	18.7932
C14Cl7	11.4798	2.63063	3899	6.77891	9.60512	11.2764	13.2839	17.3622
C14Cl8	10.1173	2.57346	3613	5.61746	8.36578	9.76489	11.9302	15.5205
C14Cl9	8.75805	2.23033	2568	4.41125	7.03651	8.83412	10.0589	13.228
C14Cl10	7.3617	2.02874	1821	3.61477	5.94254	7.215	8.78035	11.379
C14Cl11	6.2309	1.74164	2297	3.12832	4.98769	6.13073	7.33992	9.89066
C14Cl12	5.49038	1.79017	2710	2.25072	4.22339	5.37411	6.62837	9.29936
C14Cl13	5.08586	1.93455	2365	1.3944	3.76609	4.9888	6.27889	9.16942
C14Cl14	5.01425	2.33755	1263	0.567472	3.43607	4.88084	6.50145	9.69801
C14Cl15	5.18555	2.58745	419	0.0720713	3.46799	5.02063	7.15141	10.246
C14Cl16	5.63741	2.77115	119	0.434118	3.67694	5.74742	7.64193	11.1664
C15Cl0	16.1325	0	387	16.1325	16.1325	16.1325	16.1325	16.1325
C15Cl1	16.4463	0.782213	1958	16.1517	16.1517	16.1517	16.1652	19.7634
C15Cl2	16.5261	1.31523	4209	14.0176	16.1708	16.1843	17.0302	19.7825
C15Cl3	16.3801	1.90137	5529	13.419	15.1313	16.2553	17.0628	20.6611
C15Cl4	15.891	2.26918	5637	12.0588	14.3043	15.6421	17.2532	20.6802
C15Cl5	15.2086	2.62014	4915	10.9044	13.2738	14.8997	16.9259	20.5355
C15Cl6	14.2431	2.73286	4354	9.4648	12.2866	14.05	16.0648	20.1537
C15Cl7	12.9985	2.74393	3622	7.93817	10.9446	12.912	14.8658	18.9635
C15Cl8	11.7181	2.70064	3465	6.86185	9.95837	11.4016	13.7015	17.4565
C15Cl9	10.2976	2.42663	3121	5.77589	8.56667	10.2319	11.8896	15.3403
C15Cl10	8.96392	2.20448	2013	4.76122	7.30667	8.94651	10.416	13.2723
C15Cl11	7.42851	1.9284	1616	4.12664	6.06105	7.26418	8.69783	11.3114
C15Cl12	6.47526	1.75422	2322	3.39474	5.24946	6.34228	7.64457	10.1707
C15Cl13	5.87948	1.88571	2674	2.63767	4.55585	5.75521	7.06303	10.0814
C15Cl14	5.60486	2.07812	2135	1.76976	4.13958	5.50571	6.95715	9.91873
C15Cl15	5.50176	2.29676	1128	1.38332	3.89882	5.40403	6.91895	10.2962
C15Cl16	5.72683	2.6023	414	0.911526	4.04237	5.63276	7.42964	10.9683
C15Cl17	6.09623	2.8318	113	0.13071	4.03333	6.35512	7.96575	11.1613
C16Cl0	17.6467	0	323	17.6467	17.6467	17.6467	17.6467	17.6467
C16Cl1	17.9254	0.718681	1675	17.6658	17.6658	17.6658	17.6793	21.2776
C16Cl2	18.0264	1.31629	3723	15.5452	17.685	17.6985	18.5444	21.2967
C16Cl3	17.8628	1.81998	5182	14.9535	16.6455	17.7311	18.577	21.8016
C16Cl4	17.4351	2.22876	5339	13.609	15.8252	17.1709	18.7967	22.0351
C16Cl5	16.7103	2.5267	4890	12.5934	14.8904	16.4095	18.4168	21.7965
C16Cl6	15.8369	2.69426	4290	11.3408	13.8937	15.5581	17.58	21.6805
C16Cl7	14.6677	2.83863	3602	9.75254	12.5986	14.4963	16.564	20.834
C16Cl8	13.2472	2.69039	3318	8.51499	11.237	13.0588	15.1535	19.158
C16Cl9	11.9257	2.55787	3287	7.32824	10.1952	11.6245	13.8101	17.2285
C16Cl10	10.5879	2.41289	2357	5.97023	8.71734	10.7428	12.1259	15.2581
C16Cl11	9.03606	2.11225	1627	5.2106	7.49994	8.97675	10.4902	13.1425
C16Cl12	7.76676	1.86559	1531	4.41063	6.43992	7.72707	9.02724	11.403
C16Cl13	6.80207	1.83138	2286	3.51447	5.46723	6.7248	7.983	10.6314
C16Cl14	6.24779	1.99264	2548	2.89051	4.844	6.09624	7.48045	10.5334
C16Cl15	5.93778	2.18563	2033	1.88707	4.4126	5.847	7.3998	10.3478
C16Cl16	5.9487	2.40005	1028	1.58646	4.29173	5.80145	7.35439	11.1073
C16Cl17	6.01806	2.63483	371	1.30061	4.16215	5.76294	7.8534	11.1352
C17Cl0	19.1609	0	241	19.1609	19.1609	19.1609	19.1609	19.1609
C17Cl1	19.423	0.720567	1449	19.18	19.18	19.18	19.1935	22.7918
C17Cl2	19.5043	1.26876	3197	17.0459	19.1991	19.2126	20.0585	22.8109
C17Cl3	19.3361	1.73934	4814	16.4676	18.1597	19.2318	20.0777	22.8435
C17Cl4	18.9409	2.13653	5234	15.204	17.3712	18.6709	20.1103	23.5493
C17Cl5	18.3151	2.49113	4786	14.2473	16.537	17.9919	19.9309	23.4929
C17Cl6	17.4216	2.7188	4176	12.8947	15.4183	17.0741	19.227	23.1804
C17Cl7	16.3327	2.86651	3537	11.3351	14.2875	16.1087	18.2608	22.3825
C17Cl8	15.0453	2.76198	3205	10.0914	12.9897	14.9368	17.0114	20.732
C17Cl9	13.6046	2.72481	3226	8.73622	11.701	13.403	15.5546	19.4631
C17Cl10	12.1061	2.55786	2913	7.42435	10.3437	11.958	13.8437	17.3403
C17Cl11	10.6834	2.36697	1979	6.20764	8.87516	10.7442	12.2155	15.2117
C17Cl12	9.3291	2.0469	1301	5.63548	7.82312	9.29241	10.6541	13.4117
C17Cl13	7.97622	1.84128	1567	4.55433	6.6713	7.93353	9.18142	11.6697
C17Cl14	7.17579	1.91922	2274	3.78303	5.86185	7.0502	8.33229	11.3791
C17Cl15	6.68726	2.03392	2481	3.08182	5.24879	6.47191	7.96109	11.1167
C17Cl16	6.34278	2.19252	1916	2.24605	4.83448	6.24806	7.66872	10.7325
C17Cl17	6.36346	2.46664	933	2.03275	4.59459	6.27364	7.99125	11.2491
C17Cl18	6.65168	2.91139	315	0.952994	4.87358	6.66294	8.43878	11.987
C18Cl0	20.6751	0	198	20.6751	20.6751	20.6751	20.6751	20.6751
C18Cl1	20.8835	0.610937	1205	20.6942	20.6942	20.6942	20.7077	21.5536
C18Cl2	21.028	1.23238	2895	18.6409	20.7133	20.7268	21.5727	24.3251
C18Cl3	20.8329	1.66985	4377	18.0491	19.9167	20.7459	21.5918	24.4811
C18Cl4	20.4449	2.06578	4951	16.7244	18.8989	20.1993	21.6245	24.6293
C18Cl5	19.8717	2.42341	4723	15.9202	18.124	19.5731	21.4211	24.9266
C18Cl6	18.9942	2.65681	4201	14.5559	17.0903	18.6661	20.76	24.6092
C18Cl7	17.9624	2.80234	3595	13.2759	15.8741	17.7081	19.8039	24.0013
C18Cl8	16.6638	2.8464	3049	11.4981	14.5888	16.5633	18.5761	22.7379
C18Cl9	15.1823	2.69898	2980	10.4069	13.1692	14.9924	17.0052	21.1409
C18Cl10	13.7612	2.60248	3013	9.21234	12.0063	13.4659	15.6466	19.3163
C18Cl11	12.2945	2.49035	2401	7.60501	10.5019	12.2973	13.9477	17.1438
C18Cl12	10.7901	2.26798	1571	6.65753	9.14567	10.764	12.3559	15.2586
C18Cl13	9.33637	2.07573	1154	5.72081	7.81973	9.21203	10.7032	13.55
C18Cl14	8.23546	1.89907	1640	4.92479	6.92491	8.16258	9.48414	12.2466
C18Cl15	7.48014	1.9967	2313	3.7888	6.13552	7.37252	8.74905	11.8143
C18Cl16	7.00268	2.11881	2325	3.12183	5.59074	6.84425	8.31656	11.6475
C18Cl17	6.87561	2.30062	1678	2.56722	5.28253	6.67669	8.3769	11.7399
C18Cl18	6.76756	2.46524	903	1.99927	5.19505	6.69097	8.28015	11.9182
C18Cl19	7.05198	2.83778	325	1.60497	4.92664	7.1284	8.85291	12.5676
C19Cl0	22.1892	0	157	22.1892	22.1892	22.1892	22.1892	22.1892
C19Cl1	22.4559	0.749201	896	22.2084	22.2084	22.2084	22.2219	25.8201
C19Cl2	22.4993	1.21264	2612	20.1551	22.2275	22.2275	23.0869	25.8392
C19Cl3	22.3472	1.65365	4011	19.5701	21.3751	22.2601	23.106	25.8718
C19Cl4	22.0127	2.06598	4668	18.4296	20.4419	21.7797	23.1334	26.3633
C19Cl5	21.3656	2.35397	4638	17.4448	19.6667	21.0375	22.868	26.2473
C19Cl6	20.6475	2.66886	4105	16.1436	18.7174	20.4128	22.377	26.3938
C19Cl7	19.5234	2.7791	3636	14.7193	17.5337	19.2154	21.3522	25.5268
C19Cl8	18.3319	2.87054	3113	13.4994	16.2546	18.1181	20.1989	24.8415
C19Cl9	17.0045	2.82037	2831	11.8151	14.9572	16.8933	18.9505	22.9109
C19Cl10	15.4836	2.74834	2804	10.4821	13.5651	15.3355	17.4143	21.3515
C19Cl11	13.9203	2.56659	2831	9.20962	12.2233	13.7218	15.6439	19.262
C19Cl12	12.3685	2.42659	1986	7.7738	10.548	12.435	13.9148	17.151
C19Cl13	10.953	2.27766	1190	6.85111	9.40512	10.8763	12.5213	15.5688
C19Cl14	9.46335	1.99319	1136	6.15077	8.02376	9.19827	10.6909	13.7823
C19Cl15	8.53851	1.97925	1576	5.09816	7.12693	8.41365	9.81009	12.883
C19Cl16	7.79793	2.06378	2285	4.19872	6.30237	7.69634	9.12168	12.2645
C19Cl17	7.40366	2.07671	2313	3.61569	5.94055	7.24665	8.73555	11.694
C19Cl18	7.25671	2.3438	1588	2.99229	5.59679	7.13001	8.75136	12.0274
C19Cl19	7.38433	2.61917	760	2.31761	5.60804	7.32299	9.05386	12.6626
C19Cl20	7.7644	2.59499	297	2.57989	6.06817	7.8966	9.29416	12.7584
C20Cl0	23.7034	0	147	23.7034	23.7034	23.7034	23.7034	23.7034
C20Cl1	23.9501	0.700896	800	23.7225	23.7225	23.7225	23.7225	27.3343
C20Cl2	24.0153	1.19664	2196	21.6019	23.7417	23.7417	24.6011	27.3534
C20Cl3	23.849	1.56674	3699	21.1797	22.9667	23.7743	24.6202	27.386
C20Cl4	23.4916	1.97205	4477	20.2149	22.0582	23.2276	24.6393	27.6334
C20Cl5	22.9105	2.34412	4472	18.9558	21.2314	22.5995	24.2549	27.8532
C20Cl6	22.1807	2.60246	4096	17.8416	20.3104	21.9208	23.7889	27.8024
C20Cl7	21.1533	2.75855	3665	16.5425	19.1808	20.8258	22.8993	27.1215
C20Cl8	19.908	2.84689	3050	15.0446	17.825	19.6279	21.7574	26.0831
C20Cl9	18.697	2.87649	2694	13.6842	16.5717	18.5251	20.5839	24.8935
C20Cl10	17.2647	2.83082	2692	12.0381	15.1786	17.1347	19.2073	23.3392
C20Cl11	15.6019	2.70053	2859	10.8507	13.7808	15.334	17.5121	21.3201
C20Cl12	14.108	2.59899	2340	9.32471	12.288	14.1001	15.8931	19.2149
C20Cl13	12.6208	2.4605	1556	7.97397	10.7735	12.6151	14.2172	17.5288
C20Cl14	11.2243	2.15619	923	7.16791	9.69934	11.1852	12.6851	15.6063
C20Cl15	9.81679	2.01257	1120	6.12555	8.41398	9.67753	11.1203	13.8376
C20Cl16	8.82934	1.98199	1664	5.17421	7.39938	8.76893	10.0609	13.1319
C20Cl17	8.20377	2.11233	2296	4.51437	6.70067	8.05883	9.54277	12.7496
C20Cl18	7.8293	2.21153	2259	3.85845	6.26494	7.68154	9.28954	12.4625
C20Cl19	7.73986	2.42466	1472	3.19383	6.08059	7.65895	9.26071	12.8219
C20Cl20	7.74341	2.50961	714	2.83045	5.98377	7.78487	9.45337	12.7151
C20Cl21	8.18931	3.05455	259	2.10145	6.45326	8.22704	10.2988	13.7428

## Sheet: log Kow 25C
	mean	SD	n of molecules	0.025	0.25	0.5 (median)	0.75	0.975
C10Cl0	6.04475	0	1316	6.04475	6.04475	6.04475	6.04475	6.04475
C10Cl1	5.53499	0.0496077	4815	5.49981	5.52789	5.52789	5.53294	5.71455
C10Cl2	5.15216	0.16077	7581	4.95488	4.98801	5.11969	5.25765	5.43833
C10Cl3	4.92843	0.218359	7559	4.53546	4.79019	4.89661	5.01891	5.45755
C10Cl4	4.8539	0.228801	6346	4.56726	4.69518	4.78192	4.9764	5.42865
C10Cl5	4.93941	0.226896	5472	4.63011	4.76878	4.88989	5.07089	5.47637
C10Cl6	5.16598	0.2193	4498	4.80196	5.01112	5.14222	5.29454	5.6726
C10Cl7	5.49411	0.203407	3166	5.14466	5.35264	5.47744	5.62963	5.90241
C10Cl8	5.87438	0.208126	3097	5.51467	5.72686	5.85958	6.01462	6.31726
C10Cl9	6.2415	0.212714	3108	5.84408	6.09066	6.23566	6.38509	6.6617
C10Cl10	6.60876	0.227534	1859	6.1888	6.44953	6.60611	6.76787	7.07007
C10Cl11	6.99311	0.230922	706	6.55659	6.84688	6.99958	7.13549	7.47522
C10Cl12	7.34599	0.242639	126	6.8628	7.1835	7.33149	7.49936	7.81329
C11Cl0	6.59964	0	1014	6.59964	6.59964	6.59964	6.59964	6.59964
C11Cl1	6.08967	0.0474621	4062	6.05471	6.08278	6.08278	6.08784	6.26945
C11Cl2	5.69159	0.159984	6681	5.50978	5.54291	5.66336	5.80649	5.99323
C11Cl3	5.43477	0.216278	7123	5.09036	5.29497	5.41918	5.53625	5.99476
C11Cl4	5.32002	0.243247	6334	4.98997	5.15278	5.27107	5.44641	5.91952
C11Cl5	5.33148	0.242212	5287	5.02471	5.14325	5.26744	5.47569	5.93252
C11Cl6	5.49238	0.240084	4727	5.13336	5.30605	5.46635	5.63218	6.03205
C11Cl7	5.76636	0.227939	3507	5.38323	5.61277	5.7477	5.90554	6.27844
C11Cl8	6.10338	0.207944	2635	5.73026	5.95949	6.09289	6.2417	6.53323
C11Cl9	6.49235	0.21691	3097	6.09876	6.33648	6.48332	6.64166	6.93879
C11Cl10	6.86411	0.226013	2864	6.44572	6.70618	6.86199	7.01215	7.32151
C11Cl11	7.22056	0.231193	1669	6.78939	7.05881	7.21253	7.38266	7.66993
C11Cl12	7.57885	0.253314	620	7.08695	7.41287	7.58188	7.73723	8.07309
C11Cl13	7.94267	0.25199	134	7.46006	7.78663	7.93078	8.10053	8.45991
C12Cl0	7.15454	0	749	7.15454	7.15454	7.15454	7.15454	7.15454
C12Cl1	6.64451	0.046875	3352	6.60961	6.63768	6.63768	6.63768	6.82435
C12Cl2	6.23459	0.154566	6067	6.09275	6.12082	6.19019	6.31255	6.54813
C12Cl3	5.94752	0.214616	6626	5.58095	5.81646	5.94095	6.03633	6.43436
C12Cl4	5.79288	0.251914	6144	5.43044	5.61275	5.75554	5.91774	6.39851
C12Cl5	5.75626	0.252675	5264	5.4239	5.55921	5.70895	5.90159	6.38304
C12Cl6	5.84942	0.254618	4587	5.48274	5.65451	5.80711	5.99174	6.47494
C12Cl7	6.0629	0.241391	3872	5.67494	5.89189	6.03534	6.20696	6.61645
C12Cl8	6.3754	0.230397	2783	5.97065	6.21227	6.36037	6.51925	6.86837
C12Cl9	6.73287	0.214419	2402	6.34796	6.58254	6.71875	6.88127	7.1797
C12Cl10	7.10183	0.222547	2993	6.71085	6.94404	7.08734	7.25376	7.55313
C12Cl11	7.47943	0.239622	2636	7.03894	7.31737	7.47239	7.62956	7.97368
C12Cl12	7.83568	0.245698	1504	7.37089	7.66931	7.83377	7.99589	8.34481
C12Cl13	8.18648	0.246215	546	7.70268	8.01752	8.2014	8.3429	8.65915
C12Cl14	8.49902	0.268705	140	7.9186	8.34829	8.50305	8.69988	8.961
C13Cl0	7.70944	0	608	7.70944	7.70944	7.70944	7.70944	7.70944
C13Cl1	7.19728	0.0410119	2796	7.16451	7.19258	7.19258	7.19258	7.37925
C13Cl2	6.77917	0.149839	5366	6.64765	6.67572	6.68078	6.86239	7.08293
C13Cl3	6.4689	0.216571	6310	6.13079	6.31746	6.44802	6.56637	6.95771
C13Cl4	6.27221	0.247123	6015	5.8879	6.10264	6.23709	6.39446	6.88478
C13Cl5	6.19895	0.265733	5183	5.84357	6.00233	6.14576	6.34224	6.82837
C13Cl6	6.2352	0.259118	4350	5.89086	6.03546	6.18769	6.38136	6.84394
C13Cl7	6.39328	0.25535	3969	5.99381	6.20651	6.36396	6.53713	6.96986
C13Cl8	6.65961	0.246555	3230	6.22977	6.4896	6.64015	6.81271	7.18681
C13Cl9	6.97951	0.232614	2167	6.56699	6.81277	6.97246	7.12872	7.47064
C13Cl10	7.33984	0.228792	2290	6.92678	7.1783	7.32872	7.48507	7.81682
C13Cl11	7.72352	0.234011	2829	7.29136	7.56306	7.7136	7.87935	8.20323
C13Cl12	8.08514	0.249512	2454	7.61876	7.91398	8.07904	8.25296	8.58494
C13Cl13	8.44225	0.26015	1402	7.94312	8.27003	8.42631	8.61798	8.94396
C13Cl14	8.77526	0.269899	492	8.25604	8.58451	8.78007	8.98007	9.27326
C13Cl15	9.12524	0.263356	120	8.62875	8.95757	9.10493	9.29449	9.64202
C14Cl0	8.26434	0	499	8.26434	8.26434	8.26434	8.26434	8.26434
C14Cl1	7.75393	0.0433527	2359	7.71941	7.74748	7.74748	7.74748	7.93415
C14Cl2	7.32716	0.145585	4760	7.20255	7.23062	7.23568	7.41729	7.63782
C14Cl3	6.99587	0.2174	5910	6.68569	6.82369	6.96544	7.11457	7.49334
C14Cl4	6.77016	0.253687	5851	6.37493	6.59614	6.72337	6.90971	7.35126
C14Cl5	6.66905	0.281724	5104	6.27415	6.46371	6.61205	6.82716	7.34789
C14Cl6	6.65814	0.28254	4148	6.27998	6.43457	6.60206	6.82703	7.33333
C14Cl7	6.75293	0.271097	3899	6.34901	6.54507	6.71496	6.91194	7.37778
C14Cl8	6.96947	0.264306	3613	6.54259	6.78512	6.94258	7.12354	7.58228
C14Cl9	7.2546	0.249093	2568	6.82293	7.08453	7.23694	7.40411	7.80628
C14Cl10	7.58653	0.23192	1821	7.18156	7.4184	7.57796	7.73731	8.08664
C14Cl11	7.95428	0.233243	2297	7.53414	7.78919	7.94458	8.10664	8.43556
C14Cl12	8.33931	0.244234	2710	7.87874	8.16896	8.32804	8.49998	8.82619
C14Cl13	8.69759	0.254103	2365	8.23197	8.52432	8.68859	8.85907	9.19906
C14Cl14	9.05007	0.265467	1263	8.56512	8.86034	9.04046	9.22261	9.61511
C14Cl15	9.42093	0.279661	419	8.88263	9.23773	9.41639	9.59288	9.96376
C14Cl16	9.74067	0.284657	119	9.21157	9.54051	9.76655	9.93612	10.2135
C15Cl0	8.81924	0	387	8.81924	8.81924	8.81924	8.81924	8.81924
C15Cl1	8.30723	0.0408231	1958	8.27431	8.30238	8.30238	8.30238	8.48904
C15Cl2	7.86945	0.141458	4209	7.75745	7.78552	7.79058	7.97218	8.19272
C15Cl3	7.5303	0.211939	5529	7.24058	7.37732	7.51428	7.64813	8.03224
C15Cl4	7.27698	0.256787	5637	6.86552	7.1032	7.23994	7.4159	7.88789
C15Cl5	7.14018	0.27756	4915	6.72273	6.938	7.08995	7.3065	7.80036
C15Cl6	7.09447	0.290157	4354	6.69453	6.876	7.03948	7.2608	7.77731
C15Cl7	7.1518	0.289132	3622	6.74071	6.92618	7.1081	7.31491	7.83421
C15Cl8	7.29322	0.273195	3465	6.87248	7.09889	7.25255	7.45805	7.92108
C15Cl9	7.54337	0.26279	3121	7.10573	7.3535	7.51851	7.70437	8.12853
C15Cl10	7.86024	0.254738	2013	7.423	7.68286	7.83942	8.00352	8.42892
C15Cl11	8.20893	0.235964	1616	7.78563	8.04775	8.19874	8.35367	8.70153
C15Cl12	8.57208	0.242333	2322	8.12642	8.40563	8.56179	8.72824	9.06872
C15Cl13	8.95808	0.256367	2674	8.47764	8.78211	8.941	9.1242	9.4901
C15Cl14	9.31012	0.264185	2135	8.81803	9.12007	9.30097	9.48442	9.8644
C15Cl15	9.65893	0.274243	1128	9.15261	9.46924	9.65276	9.84601	10.2226
C15Cl16	10.0067	0.289974	414	9.47595	9.80483	10.0139	10.1832	10.6281
C15Cl17	10.3286	0.294679	113	9.7699	10.1606	10.3128	10.5189	10.9098
C16Cl0	9.37414	0	323	9.37414	9.37414	9.37414	9.37414	9.37414
C16Cl1	8.86062	0.0371176	1675	8.8292	8.85728	8.85728	8.85728	9.04394
C16Cl2	8.42058	0.138106	3723	8.31234	8.34042	8.34547	8.48221	8.74762
C16Cl3	8.06714	0.207239	5182	7.79548	7.92605	8.05906	8.20269	8.57515
C16Cl4	7.8017	0.26158	5339	7.38112	7.6301	7.77186	7.94941	8.42945
C16Cl5	7.62598	0.289339	4890	7.18907	7.41953	7.58013	7.7823	8.30074
C16Cl6	7.54054	0.293905	4290	7.12263	7.3195	7.48599	7.71316	8.23794
C16Cl7	7.55742	0.300643	3602	7.13894	7.32593	7.51142	7.72439	8.25265
C16Cl8	7.66882	0.288373	3318	7.23801	7.45033	7.63686	7.84034	8.33773
C16Cl9	7.86383	0.280924	3287	7.39592	7.66442	7.83446	8.03532	8.50255
C16Cl10	8.14591	0.26359	2357	7.67977	7.96227	8.12443	8.3093	8.70447
C16Cl11	8.47513	0.254842	1627	8.02007	8.29866	8.45743	8.64654	9.01676
C16Cl12	8.81956	0.245791	1531	8.38641	8.65452	8.80168	8.96975	9.35878
C16Cl13	9.20137	0.25037	2286	8.74121	9.02776	9.19843	9.36493	9.71348
C16Cl14	9.57326	0.268923	2548	9.07232	9.38652	9.55837	9.75269	10.1109
C16Cl15	9.92091	0.272951	2033	9.40352	9.73049	9.91753	10.1029	10.487
C16Cl16	10.2772	0.299082	1028	9.72198	10.0755	10.2774	10.4713	10.8969
C16Cl17	10.6155	0.283343	371	10.0895	10.4276	10.6165	10.7877	11.1629
C17Cl0	9.92903	0	241	9.92903	9.92903	9.92903	9.92903	9.92903
C17Cl1	9.41626	0.0371997	1449	9.3841	9.41217	9.41217	9.41217	9.59884
C17Cl2	8.96903	0.136607	3197	8.86724	8.89531	8.90037	9.03205	9.30252
C17Cl3	8.60384	0.202586	4814	8.35038	8.44782	8.597	8.7507	9.10865
C17Cl4	8.31468	0.253278	5234	7.93096	8.14176	8.27386	8.45071	8.93915
C17Cl5	8.11327	0.28313	4786	7.65466	7.9198	8.07854	8.26528	8.77384
C17Cl6	8.00754	0.302933	4176	7.56134	7.77902	7.9565	8.18129	8.72761
C17Cl7	8.00022	0.317152	3537	7.54727	7.75318	7.95471	8.18334	8.73728
C17Cl8	8.05768	0.305561	3205	7.60563	7.83173	8.01597	8.22998	8.75421
C17Cl9	8.20441	0.285606	3226	7.74093	7.99783	8.17521	8.3749	8.83182
C17Cl10	8.4465	0.28019	2913	7.96789	8.24727	8.41361	8.62248	9.07108
C17Cl11	8.74502	0.269269	1979	8.26289	8.55958	8.72534	8.91312	9.34566
C17Cl12	9.06273	0.255452	1301	8.59029	8.88148	9.04806	9.23721	9.5788
C17Cl13	9.41899	0.252605	1567	8.96324	9.24365	9.40207	9.58036	9.96517
C17Cl14	9.80359	0.258048	2274	9.32315	9.6275	9.79348	9.98116	10.3184
C17Cl15	10.1788	0.266379	2481	9.69248	10.0009	10.1679	10.3481	10.7454
C17Cl16	10.5355	0.280919	1916	10.0051	10.346	10.5269	10.722	11.1051
C17Cl17	10.8735	0.309251	933	10.2815	10.6659	10.8699	11.0771	11.4599
C17Cl18	11.2152	0.321153	315	10.6035	11.0061	11.1884	11.4349	11.8378
C18Cl0	10.4839	0	198	10.4839	10.4839	10.4839	10.4839	10.4839
C18Cl1	9.96914	0.0309307	1205	9.939	9.96707	9.96707	9.96707	9.97213
C18Cl2	9.5174	0.125687	2895	9.42214	9.45021	9.45021	9.58695	9.85742
C18Cl3	9.14183	0.196747	4377	8.90528	8.94347	9.12002	9.28476	9.65154
C18Cl4	8.84624	0.260356	4951	8.39348	8.66239	8.80491	8.96649	9.49958
C18Cl5	8.61981	0.294522	4723	8.15566	8.40915	8.57619	8.77983	9.33613
C18Cl6	8.48518	0.305282	4201	8.01618	8.26419	8.43998	8.6644	9.17759
C18Cl7	8.42712	0.313055	3595	7.97556	8.18631	8.37859	8.61088	9.16864
C18Cl8	8.46294	0.311912	3049	7.99394	8.22994	8.41684	8.65439	9.16534
C18Cl9	8.56589	0.304808	2980	8.08742	8.35025	8.52334	8.74779	9.24789
C18Cl10	8.75622	0.299587	3013	8.24816	8.54907	8.72011	8.92897	9.45397
C18Cl11	9.01597	0.279852	2401	8.54257	8.82241	8.99121	9.17494	9.64154
C18Cl12	9.34892	0.278753	1571	8.85185	9.15658	9.34297	9.52388	9.91435
C18Cl13	9.68618	0.263052	1154	9.18546	9.49346	9.67354	9.85121	10.2232
C18Cl14	10.0405	0.256841	1640	9.57739	9.85292	10.0272	10.2123	10.5619
C18Cl15	10.4256	0.267815	2313	9.92201	10.2387	10.4147	10.6083	10.9677
C18Cl16	10.7983	0.283251	2325	10.279	10.6045	10.7875	10.9866	11.3838
C18Cl17	11.1432	0.286299	1678	10.5938	10.9505	11.1331	11.3357	11.7405
C18Cl18	11.4897	0.305806	903	10.896	11.2858	11.4795	11.6883	12.0625
C18Cl19	11.8411	0.324075	325	11.2338	11.5997	11.8527	12.0648	12.4601
C19Cl0	11.0388	0	157	11.0388	11.0388	11.0388	11.0388	11.0388
C19Cl1	10.5271	0.0388089	896	10.4939	10.522	10.522	10.522	10.7086
C19Cl2	10.072	0.125757	2612	9.97704	10.0051	10.0051	10.1418	10.4123
C19Cl3	9.68888	0.198064	4011	9.46018	9.49331	9.67492	9.83231	10.2135
C19Cl4	9.36644	0.250386	4668	8.94838	9.18994	9.34363	9.49112	9.99002
C19Cl5	9.12633	0.287967	4638	8.66063	8.9311	9.09356	9.28216	9.81174
C19Cl6	8.96931	0.317541	4105	8.48177	8.74304	8.91954	9.14883	9.71467
C19Cl7	8.89846	0.321729	3636	8.40933	8.66351	8.84814	9.08647	9.64713
C19Cl8	8.89471	0.333384	3113	8.42398	8.64558	8.83849	9.08842	9.69492
C19Cl9	8.95952	0.313385	2831	8.4797	8.72358	8.91039	9.15447	9.67037
C19Cl10	9.10073	0.297651	2804	8.60984	8.89	9.06861	9.27659	9.77673
C19Cl11	9.34255	0.30134	2831	8.83218	9.13525	9.31048	9.51887	10.0161
C19Cl12	9.6407	0.282996	1986	9.15017	9.44279	9.62226	9.80296	10.2449
C19Cl13	9.96506	0.276338	1190	9.48251	9.78186	9.94636	10.1395	10.5406
C19Cl14	10.297	0.25662	1136	9.82655	10.1172	10.3008	10.4639	10.8139
C19Cl15	10.6746	0.268579	1576	10.1826	10.4871	10.6708	10.8552	11.2132
C19Cl16	11.0364	0.281269	2285	10.5247	10.8449	11.0241	11.2126	11.6355
C19Cl17	11.411	0.289814	2313	10.8637	11.2109	11.4019	11.6053	11.9884
C19Cl18	11.7592	0.299978	1588	11.2002	11.5538	11.746	11.9608	12.3437
C19Cl19	12.1064	0.320033	760	11.5462	11.8893	12.0954	12.3155	12.7262
C19Cl20	12.4081	0.294554	297	11.8516	12.2188	12.4254	12.607	12.9921
C20Cl0	11.5937	0	147	11.5937	11.5937	11.5937	11.5937	11.5937
C20Cl1	11.0806	0.0360715	800	11.0488	11.0769	11.0769	11.0769	11.2635
C20Cl2	10.6223	0.122702	2196	10.5319	10.56	10.56	10.6625	10.9672
C20Cl3	10.2229	0.195982	3699	10.0151	10.0482	10.1799	10.3171	10.7707
C20Cl4	9.89743	0.250144	4477	9.49822	9.73372	9.87769	10.0262	10.4917
C20Cl5	9.64515	0.292296	4472	9.18746	9.44954	9.61166	9.79611	10.3147
C20Cl6	9.46084	0.321917	4096	8.95035	9.24121	9.40947	9.64304	10.2346
C20Cl7	9.3609	0.331527	3665	8.85853	9.11583	9.30478	9.55495	10.1813
C20Cl8	9.34018	0.340935	3050	8.83246	9.08219	9.29247	9.5434	10.1298
C20Cl9	9.36413	0.326149	2694	8.87824	9.11386	9.32758	9.55328	10.1154
C20Cl10	9.47715	0.322582	2692	8.96228	9.23406	9.44052	9.67862	10.1932
C20Cl11	9.67354	0.311094	2859	9.15556	9.45616	9.64441	9.86016	10.3677
C20Cl12	9.92698	0.302632	2340	9.42546	9.71359	9.90272	10.1077	10.5853
C20Cl13	10.2315	0.29007	1556	9.70686	10.0291	10.2108	10.4037	10.8837
C20Cl14	10.5563	0.280842	923	10.0524	10.3642	10.5452	10.7237	11.165
C20Cl15	10.9	0.260757	1120	10.4147	10.7108	10.8902	11.0688	11.431
C20Cl16	11.2887	0.282626	1664	10.7381	11.099	11.2866	11.4736	11.8536
C20Cl17	11.6533	0.29346	2296	11.1038	11.4472	11.6471	11.8492	12.249
C20Cl18	12.023	0.305425	2259	11.447	11.8131	12.0182	12.2206	12.6558
C20Cl19	12.3744	0.307409	1472	11.7989	12.1676	12.369	12.5732	12.9846
C20Cl20	12.7376	0.315639	714	12.1386	12.525	12.7408	12.9418	13.381
C20Cl21	13.0206	0.324411	259	12.3521	12.7817	13.0402	13.2322	13.6161

## Sheet: log Kaw 25C
	mean	SD	n of molecules	0.025	0.25	0.5 (median)	0.75	0.975
C10Cl0	2.01485	0	1316	2.01485	2.01485	2.01485	2.01485	2.01485
C10Cl1	0.421567	0.0857766	4815	0.287788	0.297297	0.438731	0.47611	0.508799
C10Cl2	-0.967596	0.306336	7581	-1.42025	-1.24144	-1.0805	-0.687607	-0.468381
C10Cl3	-2.09562	0.427556	7559	-2.79805	-2.37572	-2.16553	-1.89955	-1.16147
C10Cl4	-2.95433	0.478784	6346	-3.69192	-3.28801	-3.0044	-2.66412	-1.88751
C10Cl5	-3.55192	0.495848	5472	-4.3973	-3.90246	-3.6145	-3.26591	-2.42833
C10Cl6	-3.91837	0.494027	4498	-4.82294	-4.26111	-3.93163	-3.5876	-2.8976
C10Cl7	-4.06904	0.486545	3166	-5.01536	-4.38679	-4.09406	-3.72971	-3.16451
C10Cl8	-4.14446	0.470994	3097	-5.01152	-4.47028	-4.15062	-3.83357	-3.21955
C10Cl9	-4.27083	0.45935	3108	-5.10092	-4.6125	-4.27921	-3.95016	-3.34392
C10Cl10	-4.38025	0.435579	1859	-5.19922	-4.69493	-4.40004	-4.07404	-3.55441
C10Cl11	-4.42917	0.423775	706	-5.23577	-4.69425	-4.42169	-4.15754	-3.63085
C10Cl12	-4.57774	0.423582	126	-5.38216	-4.85331	-4.6189	-4.30713	-3.67102
C11Cl0	2.10244	0	1014	2.10244	2.10244	2.10244	2.10244	2.10244
C11Cl1	0.518569	0.0847683	4062	0.375383	0.384891	0.563704	0.596393	0.596393
C11Cl2	-0.883767	0.296744	6681	-1.33266	-1.12116	-0.979722	-0.636409	-0.366139
C11Cl3	-2.05117	0.422514	7123	-2.83871	-2.31756	-2.09834	-1.82865	-1.09219
C11Cl4	-2.97844	0.497969	6334	-3.80736	-3.31127	-3.02571	-2.68811	-1.84412
C11Cl5	-3.67499	0.514099	5287	-4.51352	-4.04656	-3.72208	-3.36665	-2.51132
C11Cl6	-4.11484	0.530396	4727	-5.05556	-4.48629	-4.1409	-3.80248	-2.95023
C11Cl7	-4.38579	0.521992	3507	-5.34921	-4.73974	-4.41433	-4.03997	-3.25663
C11Cl8	-4.50853	0.494411	2635	-5.43065	-4.85401	-4.52705	-4.16003	-3.55978
C11Cl9	-4.55353	0.484195	3097	-5.48607	-4.89263	-4.54891	-4.22273	-3.60003
C11Cl10	-4.65709	0.458803	2864	-5.49184	-4.99467	-4.66381	-4.34937	-3.7252
C11Cl11	-4.75592	0.452068	1669	-5.58824	-5.08254	-4.77408	-4.44257	-3.81193
C11Cl12	-4.85422	0.450999	620	-5.76259	-5.15932	-4.86363	-4.54327	-4.02606
C11Cl13	-4.91297	0.392199	134	-5.69133	-5.14898	-4.97408	-4.69984	-4.15198
C12Cl0	2.19004	0	749	2.19004	2.19004	2.19004	2.19004	2.19004
C12Cl1	0.611257	0.0850219	3352	0.462977	0.61392	0.651299	0.683988	0.683988
C12Cl2	-0.799497	0.288172	6067	-1.24506	-1.03356	-0.892128	-0.548814	-0.270729
C12Cl3	-2.0114	0.410675	6626	-2.75111	-2.26636	-2.03165	-1.81659	-1.04197
C12Cl4	-2.98506	0.506366	6144	-3.80702	-3.35402	-3.02687	-2.69525	-1.83976
C12Cl5	-3.76628	0.530957	5264	-4.62562	-4.15936	-3.82439	-3.44661	-2.56047
C12Cl6	-4.30371	0.545936	4587	-5.18303	-4.68556	-4.36346	-3.97765	-3.10106
C12Cl7	-4.65303	0.548629	3872	-5.6287	-5.04985	-4.68343	-4.32173	-3.45191
C12Cl8	-4.84375	0.51935	2783	-5.80217	-5.19941	-4.85931	-4.5018	-3.79149
C12Cl9	-4.90025	0.49273	2402	-5.86223	-5.23955	-4.90743	-4.54583	-3.97182
C12Cl10	-4.99091	0.495786	2993	-5.87765	-5.35441	-4.99789	-4.6635	-3.99107
C12Cl11	-5.06063	0.482388	2636	-5.92985	-5.40318	-5.05958	-4.72449	-4.1118
C12Cl12	-5.15055	0.475131	1504	-6.03455	-5.49136	-5.16747	-4.81631	-4.18975
C12Cl13	-5.23576	0.45093	546	-6.06809	-5.53732	-5.25294	-4.94289	-4.2885
C12Cl14	-5.37979	0.449289	140	-6.30806	-5.65244	-5.31306	-5.06779	-4.58486
C13Cl0	2.27763	0	608	2.27763	2.27763	2.27763	2.27763	2.27763
C13Cl1	0.709028	0.0815263	2796	0.550571	0.701514	0.738893	0.771582	0.771582
C13Cl2	-0.710824	0.276468	5366	-1.15747	-0.945968	-0.804534	-0.474037	-0.172909
C13Cl3	-1.94599	0.408655	6310	-2.66352	-2.21502	-1.96356	-1.74977	-1.01999
C13Cl4	-3.00086	0.487034	6015	-3.79936	-3.34858	-3.04435	-2.7188	-1.90326
C13Cl5	-3.83339	0.544085	5183	-4.73247	-4.23298	-3.89051	-3.49922	-2.61891
C13Cl6	-4.45659	0.547746	4350	-5.32028	-4.84557	-4.51402	-4.11622	-3.27144
C13Cl7	-4.88725	0.558941	3969	-5.86299	-5.29236	-4.92475	-4.56063	-3.66226
C13Cl8	-5.14919	0.554311	3230	-6.18716	-5.53333	-5.17315	-4.79251	-3.98764
C13Cl9	-5.27691	0.534516	2167	-6.32933	-5.64726	-5.29529	-4.89941	-4.26178
C13Cl10	-5.31559	0.50643	2290	-6.28312	-5.64913	-5.33352	-4.97113	-4.36294
C13Cl11	-5.36396	0.498251	2829	-6.29093	-5.71388	-5.36377	-5.01247	-4.41117
C13Cl12	-5.45529	0.494054	2454	-6.36258	-5.81051	-5.47008	-5.11844	-4.44315
C13Cl13	-5.54143	0.480639	1402	-6.45521	-5.87585	-5.55532	-5.23213	-4.56276
C13Cl14	-5.66254	0.485592	492	-6.53457	-6.00736	-5.65217	-5.35685	-4.68159
C13Cl15	-5.78799	0.445089	120	-6.61869	-6.08974	-5.77511	-5.51582	-4.9325
C14Cl0	2.36522	0	499	2.36522	2.36522	2.36522	2.36522	2.36522
C14Cl1	0.800278	0.0807555	2359	0.638166	0.789108	0.826487	0.859176	0.859176
C14Cl2	-0.619052	0.269365	4760	-0.93795	-0.858373	-0.712249	-0.429476	-0.0853151
C14Cl3	-1.89392	0.406006	5910	-2.57592	-2.20334	-1.87967	-1.67947	-0.934926
C14Cl4	-2.97816	0.497692	5851	-3.82179	-3.34284	-3.02985	-2.67153	-1.8802
C14Cl5	-3.85452	0.558194	5104	-4.78228	-4.26455	-3.91203	-3.49593	-2.61462
C14Cl6	-4.56843	0.582	4148	-5.54145	-4.96823	-4.6304	-4.21964	-3.25231
C14Cl7	-5.09067	0.579385	3899	-6.07344	-5.50131	-5.14636	-4.74048	-3.85323
C14Cl8	-5.41586	0.585338	3613	-6.47091	-5.81455	-5.43192	-5.05389	-4.18734
C14Cl9	-5.61895	0.549121	2568	-6.62941	-6.00232	-5.64097	-5.26569	-4.48669
C14Cl10	-5.70311	0.530315	1821	-6.70372	-6.06716	-5.71373	-5.3432	-4.67068
C14Cl11	-5.73913	0.519426	2297	-6.73435	-6.0951	-5.74029	-5.38421	-4.76515
C14Cl12	-5.76484	0.518369	2710	-6.73852	-6.11907	-5.74933	-5.40812	-4.7269
C14Cl13	-5.85027	0.502604	2365	-6.8081	-6.20251	-5.85125	-5.5176	-4.86215
C14Cl14	-5.94907	0.490524	1263	-6.88454	-6.30115	-5.96791	-5.60903	-4.97204
C14Cl15	-6.02496	0.492152	419	-6.9973	-6.35893	-6.00465	-5.69301	-5.07047
C14Cl16	-6.06936	0.459528	119	-6.75497	-6.38697	-6.08935	-5.74892	-5.22752
C15Cl0	2.45282	0	387	2.45282	2.45282	2.45282	2.45282	2.45282
C15Cl1	0.889813	0.0812499	1958	0.72576	0.876703	0.946771	0.946771	0.946771
C15Cl2	-0.54813	0.255789	4209	-0.840847	-0.770779	-0.624655	-0.431022	0.00227926
C15Cl3	-1.82803	0.398295	5529	-2.48833	-2.14857	-1.82477	-1.59188	-0.89508
C15Cl4	-2.94294	0.491483	5637	-3.77737	-3.29213	-2.98976	-2.6246	-1.87148
C15Cl5	-3.88574	0.549868	4915	-4.78526	-4.28343	-3.9529	-3.55228	-2.65312
C15Cl6	-4.64918	0.581841	4354	-5.60162	-5.06901	-4.71589	-4.30031	-3.31791
C15Cl7	-5.22133	0.602848	3622	-6.23847	-5.66199	-5.27645	-4.84589	-3.85927
C15Cl8	-5.66458	0.59258	3465	-6.70408	-6.07228	-5.70419	-5.31418	-4.37547
C15Cl9	-5.9306	0.584815	3121	-6.98932	-6.34274	-5.954	-5.56174	-4.68706
C15Cl10	-6.05241	0.574731	2013	-7.08763	-6.44217	-6.09045	-5.67242	-4.87649
C15Cl11	-6.08589	0.527103	1616	-7.06753	-6.45512	-6.09503	-5.70711	-5.11095
C15Cl12	-6.12662	0.530921	2322	-7.16814	-6.48012	-6.11895	-5.77539	-5.15986
C15Cl13	-6.17056	0.522314	2674	-7.12766	-6.54311	-6.19067	-5.8078	-5.12501
C15Cl14	-6.25801	0.516136	2135	-7.20718	-6.61521	-6.27725	-5.90972	-5.20365
C15Cl15	-6.34574	0.512912	1128	-7.32489	-6.70176	-6.3461	-6.00445	-5.31494
C15Cl16	-6.43592	0.48349	414	-7.38399	-6.73906	-6.41869	-6.10834	-5.50249
C15Cl17	-6.51148	0.467738	113	-7.43647	-6.80254	-6.51145	-6.15531	-5.72752
C16Cl0	2.54041	0	323	2.54041	2.54041	2.54041	2.54041	2.54041
C16Cl1	0.981808	0.0798647	1675	0.813354	0.964297	1.03436	1.03436	1.03436
C16Cl2	-0.457969	0.255679	3723	-0.762761	-0.683185	-0.504371	-0.343428	0.0898736
C16Cl3	-1.75163	0.385675	5182	-2.40073	-2.06098	-1.73816	-1.50428	-0.839652
C16Cl4	-2.89943	0.493292	5339	-3.77853	-3.24192	-2.94941	-2.6116	-1.81309
C16Cl5	-3.88098	0.558889	4890	-4.80934	-4.27225	-3.93873	-3.54255	-2.62411
C16Cl6	-4.72456	0.587475	4290	-5.6858	-5.15479	-4.78219	-4.37092	-3.40103
C16Cl7	-5.35919	0.617643	3602	-6.39358	-5.80906	-5.42219	-4.98752	-3.95987
C16Cl8	-5.83432	0.604268	3318	-6.91349	-6.24872	-5.88427	-5.45013	-4.52438
C16Cl9	-6.17517	0.600701	3287	-7.24256	-6.58746	-6.20973	-5.80009	-4.8647
C16Cl10	-6.39936	0.595323	2357	-7.47828	-6.81529	-6.45432	-6.02863	-5.15289
C16Cl11	-6.4726	0.576085	1627	-7.58802	-6.87234	-6.49005	-6.06996	-5.34744
C16Cl12	-6.51453	0.533504	1531	-7.52677	-6.87835	-6.5116	-6.14473	-5.48064
C16Cl13	-6.50373	0.529694	2286	-7.52645	-6.86729	-6.49443	-6.13484	-5.48679
C16Cl14	-6.56356	0.533789	2548	-7.5956	-6.95462	-6.56591	-6.19968	-5.52762
C16Cl15	-6.65971	0.534976	2033	-7.66432	-7.03177	-6.67387	-6.27907	-5.59654
C16Cl16	-6.73272	0.549174	1028	-7.74643	-7.11499	-6.7486	-6.36262	-5.58501
C16Cl17	-6.8311	0.510614	371	-7.83372	-7.17767	-6.85288	-6.46277	-5.82146
C17Cl0	2.62801	0	241	2.62801	2.62801	2.62801	2.62801	2.62801
C17Cl1	1.07472	0.0767176	1449	0.900949	1.05189	1.12196	1.12196	1.12196
C17Cl2	-0.375276	0.246853	3197	-0.665658	-0.59559	-0.416777	-0.378587	0.167243
C17Cl3	-1.68116	0.375912	4814	-2.31314	-1.97338	-1.67274	-1.42923	-0.793615
C17Cl4	-2.86213	0.474772	5234	-3.69093	-3.16979	-2.92274	-2.56138	-1.81354
C17Cl5	-3.895	0.550754	4786	-4.81132	-4.28066	-3.95199	-3.55701	-2.67642
C17Cl6	-4.75663	0.600709	4176	-5.7507	-5.19441	-4.80823	-4.37519	-3.47305
C17Cl7	-5.45146	0.639909	3537	-6.48082	-5.91987	-5.52716	-5.05356	-4.04548
C17Cl8	-6.02066	0.639264	3205	-7.06048	-6.47917	-6.09078	-5.63115	-4.61596
C17Cl9	-6.42609	0.612261	3226	-7.49904	-6.85497	-6.46981	-6.04422	-5.11147
C17Cl10	-6.68875	0.623722	2913	-7.82777	-7.1094	-6.71298	-6.30454	-5.39431
C17Cl11	-6.85563	0.585019	1979	-7.9263	-7.26058	-6.88109	-6.48928	-5.63271
C17Cl12	-6.9225	0.546798	1301	-7.97664	-7.30326	-6.93453	-6.53407	-5.89825
C17Cl13	-6.92225	0.542969	1567	-7.98556	-7.28785	-6.94488	-6.54708	-5.89614
C17Cl14	-6.93917	0.544187	2274	-7.98561	-7.30294	-6.94012	-6.57463	-5.86961
C17Cl15	-6.97664	0.547782	2481	-7.98701	-7.35794	-6.99772	-6.60295	-5.881
C17Cl16	-7.0546	0.547678	1916	-8.10146	-7.42865	-7.06977	-6.66798	-6.01475
C17Cl17	-7.15978	0.56436	933	-8.23403	-7.55597	-7.16932	-6.76002	-6.02919
C17Cl18	-7.22966	0.527096	315	-8.21222	-7.59039	-7.20724	-6.88395	-6.25428
C18Cl0	2.7156	0	198	2.7156	2.7156	2.7156	2.7156	2.7156
C18Cl1	1.1679	0.0727094	1205	0.998052	1.13949	1.20955	1.20955	1.20955
C18Cl2	-0.286877	0.235026	2895	-0.578064	-0.507996	-0.329183	-0.296494	0.265062
C18Cl3	-1.61038	0.363806	4377	-2.22555	-1.88579	-1.63433	-1.34449	-0.717319
C18Cl4	-2.79545	0.476614	4951	-3.59967	-3.11225	-2.85002	-2.48705	-1.70191
C18Cl5	-3.86982	0.550887	4723	-4.76571	-4.25507	-3.92338	-3.55262	-2.62439
C18Cl6	-4.77655	0.602351	4201	-5.79688	-5.21143	-4.83847	-4.41312	-3.42779
C18Cl7	-5.55146	0.628958	3595	-6.59693	-6.00796	-5.60129	-5.15463	-4.16977
C18Cl8	-6.15925	0.642441	3049	-7.26645	-6.62001	-6.22678	-5.74977	-4.74007
C18Cl9	-6.62216	0.641203	2980	-7.78309	-7.06501	-6.66429	-6.22339	-5.26892
C18Cl10	-6.95863	0.643371	3013	-8.14044	-7.40108	-6.98712	-6.55604	-5.6066
C18Cl11	-7.18377	0.602373	2401	-8.30652	-7.5873	-7.19957	-6.805	-5.93385
C18Cl12	-7.29045	0.598335	1571	-8.41337	-7.71291	-7.30735	-6.87286	-6.09469
C18Cl13	-7.30463	0.567411	1154	-8.43071	-7.68605	-7.30097	-6.90745	-6.24823
C18Cl14	-7.31805	0.559371	1640	-8.37288	-7.70338	-7.31858	-6.91864	-6.25256
C18Cl15	-7.33844	0.562703	2313	-8.41666	-7.7304	-7.33293	-6.9601	-6.22737
C18Cl16	-7.37642	0.555826	2325	-8.40494	-7.78159	-7.40469	-6.99176	-6.25057
C18Cl17	-7.44468	0.555771	1678	-8.47654	-7.8334	-7.45913	-7.06582	-6.36927
C18Cl18	-7.53371	0.540054	903	-8.59872	-7.90642	-7.52911	-7.15328	-6.47223
C18Cl19	-7.6368	0.55859	325	-8.71064	-8.02858	-7.63706	-7.30449	-6.55345
C19Cl0	2.8032	0	157	2.8032	2.8032	2.8032	2.8032	2.8032
C19Cl1	1.25307	0.0760368	896	1.07614	1.22708	1.29715	1.29715	1.29715
C19Cl2	-0.197245	0.230604	2612	-0.490469	-0.311656	-0.241588	-0.2089	0.340282
C19Cl3	-1.53219	0.359397	4011	-2.13795	-1.79819	-1.54674	-1.27607	-0.629725
C19Cl4	-2.75572	0.466071	4668	-3.51574	-3.07367	-2.81275	-2.49123	-1.67356
C19Cl5	-3.83983	0.54465	4638	-4.77034	-4.2308	-3.88876	-3.51335	-2.58873
C19Cl6	-4.79826	0.616635	4105	-5.83838	-5.23008	-4.86	-4.43467	-3.39179
C19Cl7	-5.58673	0.635445	3636	-6.66283	-6.04016	-5.64485	-5.18992	-4.17523
C19Cl8	-6.26779	0.655935	3113	-7.40423	-6.74028	-6.32957	-5.86512	-4.85477
C19Cl9	-6.79653	0.652962	2831	-7.89934	-7.26687	-6.84216	-6.39755	-5.34843
C19Cl10	-7.20906	0.628311	2804	-8.35457	-7.61812	-7.24592	-6.82654	-5.86199
C19Cl11	-7.46319	0.62971	2831	-8.58464	-7.90923	-7.50075	-7.0657	-6.0943
C19Cl12	-7.60971	0.62494	1986	-8.75927	-8.05012	-7.61768	-7.22518	-6.32329
C19Cl13	-7.66036	0.601164	1190	-8.76865	-8.08957	-7.68162	-7.26766	-6.43073
C19Cl14	-7.71106	0.568554	1136	-8.87128	-8.09796	-7.69563	-7.31213	-6.62382
C19Cl15	-7.68247	0.558325	1576	-8.78068	-8.07978	-7.68979	-7.27543	-6.61884
C19Cl16	-7.75011	0.568432	2285	-8.83967	-8.1596	-7.75518	-7.34896	-6.60886
C19Cl17	-7.77324	0.56979	2313	-8.7968	-8.17982	-7.77207	-7.36795	-6.63667
C19Cl18	-7.86293	0.558867	1588	-8.90102	-8.25573	-7.87567	-7.48815	-6.75103
C19Cl19	-7.8966	0.561697	760	-8.90869	-8.27332	-7.91438	-7.51912	-6.70618
C19Cl20	-8.02897	0.534224	297	-9.05649	-8.37848	-8.04814	-7.70453	-6.92273
C20Cl0	2.89079	0	147	2.89079	2.89079	2.89079	2.89079	2.89079
C20Cl1	1.34245	0.0755196	800	1.16373	1.35205	1.38474	1.38474	1.38474
C20Cl2	-0.114072	0.224469	2196	-0.402875	-0.224062	-0.153994	-0.121305	0.430026
C20Cl3	-1.46236	0.355611	3699	-2.05036	-1.72011	-1.4991	-1.23885	-0.603609
C20Cl4	-2.69375	0.463977	4477	-3.42815	-3.00159	-2.7319	-2.41315	-1.64894
C20Cl5	-3.79885	0.550688	4472	-4.71914	-4.19799	-3.83782	-3.47583	-2.57676
C20Cl6	-4.7945	0.610338	4096	-5.81749	-5.23646	-4.85173	-4.42302	-3.44925
C20Cl7	-5.63216	0.644925	3665	-6.73396	-6.0918	-5.686	-5.22875	-4.20852
C20Cl8	-6.32851	0.680656	3050	-7.47112	-6.81308	-6.39309	-5.90718	-4.79448
C20Cl9	-6.94474	0.66572	2694	-8.06096	-7.42276	-7.00184	-6.51521	-5.50646
C20Cl10	-7.41489	0.65467	2692	-8.52821	-7.88761	-7.43977	-7.00738	-6.02678
C20Cl11	-7.71424	0.665164	2859	-8.90088	-8.17293	-7.75957	-7.29047	-6.28199
C20Cl12	-7.94104	0.650569	2340	-9.08484	-8.4016	-7.97213	-7.52074	-6.57549
C20Cl13	-8.08357	0.633699	1556	-9.26969	-8.5213	-8.09863	-7.67903	-6.75532
C20Cl14	-8.13186	0.608727	923	-9.31677	-8.57444	-8.12897	-7.70859	-6.94078
C20Cl15	-8.10426	0.581722	1120	-9.24954	-8.50954	-8.08426	-7.6886	-7.00108
C20Cl16	-8.08861	0.56695	1664	-9.20279	-8.48318	-8.07639	-7.70663	-6.9812
C20Cl17	-8.13828	0.594202	2296	-9.28002	-8.54279	-8.14318	-7.73181	-6.9778
C20Cl18	-8.17155	0.581625	2259	-9.29937	-8.55934	-8.18149	-7.7799	-7.03423
C20Cl19	-8.23309	0.573862	1472	-9.31028	-8.64559	-8.23181	-7.83682	-7.10251
C20Cl20	-8.28806	0.573633	714	-9.41676	-8.69722	-8.29283	-7.86367	-7.13577
C20Cl21	-8.43409	0.560442	259	-9.44923	-8.82588	-8.44848	-8.04759	-7.35968

## Sheet: log Koa 25C
	mean	SD	n of molecules	0.025	0.25	0.5 (median)	0.75	0.975
C10Cl0	4.23769	0	1316	4.23769	4.23769	4.23769	4.23769	4.23769
C10Cl1	5.28473	0.108518	4815	5.19581	5.22031	5.26131	5.37192	5.60922
C10Cl2	6.26081	0.209524	7581	5.88224	6.11327	6.24393	6.3731	6.63284
C10Cl3	7.14387	0.27613	7559	6.59469	6.92556	7.17162	7.33134	7.70155
C10Cl4	7.914	0.319977	6346	7.30088	7.68933	7.94903	8.13591	8.4894
C10Cl5	8.58996	0.341115	5472	7.90694	8.34718	8.59192	8.82856	9.23014
C10Cl6	9.17977	0.34713	4498	8.52412	8.93771	9.17905	9.41643	9.86931
C10Cl7	9.66058	0.345326	3166	9.04985	9.40254	9.65915	9.88625	10.3473
C10Cl8	10.1181	0.321552	3097	9.53882	9.9081	10.1006	10.3355	10.7605
C10Cl9	10.6173	0.306855	3108	10.0235	10.4099	10.6001	10.8582	11.1756
C10Cl10	11.1017	0.265721	1859	10.5867	10.9138	11.1082	11.2961	11.5723
C10Cl11	11.5504	0.243848	706	11.0908	11.3665	11.5669	11.711	12.0174
C10Cl12	12.0677	0.236242	126	11.6038	11.923	12.0823	12.2432	12.508
C11Cl0	4.72662	0	1014	4.72662	4.72662	4.72662	4.72662	4.72662
C11Cl1	5.76454	0.106643	4062	5.68473	5.68473	5.70924	5.86084	6.09815
C11Cl2	6.73832	0.19753	6681	6.37117	6.60646	6.73286	6.84346	7.12176
C11Cl3	7.6259	0.272793	7123	7.08362	7.45877	7.63008	7.82027	8.19048
C11Cl4	8.4228	0.325316	6334	7.76937	8.2038	8.44029	8.65742	9.0348
C11Cl5	9.12058	0.346849	5287	8.43767	8.88571	9.11968	9.38401	9.75169
C11Cl6	9.71632	0.365772	4727	9.00725	9.45363	9.71858	9.97342	10.4235
C11Cl7	10.2596	0.369539	3507	9.53142	10.0019	10.2587	10.515	10.9718
C11Cl8	10.7213	0.354223	2635	10.0797	10.4792	10.7182	10.9578	11.3991
C11Cl9	11.1617	0.336669	3097	10.5657	10.9352	11.1506	11.3905	11.8018
C11Cl10	11.6437	0.304323	2864	11.0573	11.4324	11.642	11.8728	12.1795
C11Cl11	12.1069	0.28363	1669	11.5359	11.9102	12.1236	12.3074	12.6315
C11Cl12	12.5707	0.254598	620	12.0303	12.3979	12.5781	12.7575	13.0406
C11Cl13	13.0189	0.199744	134	12.6247	12.8991	13.0245	13.1591	13.3936
C12Cl0	5.21555	0	749	5.21555	5.21555	5.21555	5.21555	5.21555
C12Cl1	6.24879	0.106741	3352	6.17366	6.17366	6.19817	6.23917	6.58707
C12Cl2	7.21899	0.196381	6067	6.84659	7.09538	7.19728	7.31987	7.61069
C12Cl3	8.1193	0.261573	6626	7.57402	7.99279	8.119	8.3059	8.67941
C12Cl4	8.92055	0.32648	6144	8.25951	8.71565	8.92047	9.1581	9.52731
C12Cl5	9.65231	0.354771	5264	8.93702	9.41324	9.66756	9.90168	10.3077
C12Cl6	10.2762	0.372486	4587	9.53716	10.0209	10.2874	10.5343	10.9749
C12Cl7	10.8368	0.387106	3872	10.0911	10.5669	10.8343	11.0974	11.6013
C12Cl8	11.3397	0.371712	2783	10.635	11.0807	11.3413	11.5902	12.0718
C12Cl9	11.757	0.352916	2402	11.1134	11.5072	11.7634	11.9918	12.4703
C12Cl10	12.2216	0.344526	2993	11.5631	11.9894	12.2226	12.4675	12.875
C12Cl11	12.6765	0.312368	2636	12.0732	12.4455	12.6787	12.9123	13.2411
C12Cl12	13.1298	0.292627	1504	12.5283	12.9242	13.1435	13.3463	13.663
C12Cl13	13.5764	0.273924	546	13.0088	13.3908	13.5988	13.7839	14.034
C12Cl14	14.0472	0.262554	140	13.4792	13.8767	14.0505	14.2193	14.5563
C13Cl0	5.70448	0	608	5.70448	5.70448	5.70448	5.70448	5.70448
C13Cl1	6.72577	0.0981622	2796	6.66259	6.66259	6.68709	6.7281	7.076
C13Cl2	7.69678	0.188121	5366	7.33551	7.611	7.68621	7.79681	8.05862
C13Cl3	8.59616	0.258833	6310	8.06147	8.45874	8.58626	8.77943	9.06972
C13Cl4	9.43457	0.314525	6015	8.80138	9.23927	9.42996	9.65899	10.0127
C13Cl5	10.1798	0.355221	5183	9.46194	9.93951	10.1761	10.427	10.8445
C13Cl6	10.8296	0.371219	4350	10.0824	10.5836	10.8383	11.0887	11.5422
C13Cl7	11.4125	0.39066	3969	10.6643	11.1424	11.4236	11.6812	12.1624
C13Cl8	11.9408	0.397549	3230	11.1773	11.6768	11.9281	12.216	12.7007
C13Cl9	12.3914	0.388395	2167	11.6893	12.1132	12.3926	12.6519	13.1964
C13Cl10	12.7934	0.361312	2290	12.1348	12.5296	12.801	13.04	13.5115
C13Cl11	13.2317	0.342005	2829	12.5873	12.9859	13.2251	13.4718	13.8961
C13Cl12	13.6912	0.322884	2454	13.061	13.4632	13.6876	13.9231	14.285
C13Cl13	14.1449	0.29226	1402	13.5484	13.9344	14.1593	14.3568	14.6803
C13Cl14	14.6058	0.274342	492	14.0564	14.4137	14.6296	14.8004	15.1438
C13Cl15	15.0958	0.250809	120	14.6242	14.9104	15.1074	15.2528	15.5819
C14Cl0	6.1934	0	499	6.1934	6.1934	6.1934	6.1934	6.1934
C14Cl1	7.21321	0.101678	2359	7.15152	7.15152	7.17602	7.21702	7.56493
C14Cl2	8.17482	0.183057	4760	7.81345	8.10963	8.17514	8.28574	8.54754
C14Cl3	9.09214	0.254855	5910	8.5504	8.95512	9.11094	9.26835	9.54995
C14Cl4	9.9298	0.314819	5851	9.28635	9.71494	9.94898	10.1479	10.5052
C14Cl5	10.6897	0.356443	5104	9.97232	10.4527	10.6906	10.9426	11.3614
C14Cl6	11.3818	0.380888	4148	10.624	11.125	11.3818	11.6469	12.1077
C14Cl7	11.9909	0.399683	3899	11.2039	11.7273	11.9946	12.263	12.7566
C14Cl8	12.5283	0.4126	3613	11.7343	12.2408	12.515	12.8134	13.3694
C14Cl9	13.0159	0.400887	2568	12.2347	12.7305	13.018	13.2917	13.7804
C14Cl10	13.4357	0.388116	1821	12.7082	13.1479	13.4392	13.6896	14.2013
C14Cl11	13.8464	0.369317	2297	13.1519	13.5836	13.8419	14.0887	14.5806
C14Cl12	14.2637	0.352261	2710	13.5812	14.0199	14.2567	14.5189	14.9214
C14Cl13	14.7114	0.326598	2365	14.0729	14.4807	14.7161	14.9452	15.3311
C14Cl14	15.1712	0.300522	1263	14.5441	14.9698	15.1915	15.3765	15.725
C14Cl15	15.627	0.285127	419	15.0753	15.4274	15.6269	15.8309	16.1365
C14Cl16	16.017	0.238651	119	15.5646	15.8578	16.0236	16.1686	16.423
C15Cl0	6.68233	0	387	6.68233	6.68233	6.68233	6.68233	6.68233
C15Cl1	7.69879	0.0984337	1958	7.64044	7.64044	7.64044	7.70595	8.05386
C15Cl2	8.6679	0.173029	4209	8.30237	8.59856	8.66406	8.77467	9.03647
C15Cl3	9.58219	0.253291	5529	9.0518	9.44015	9.60427	9.75728	10.0476
C15Cl4	10.4209	0.307371	5637	9.79025	10.2052	10.4422	10.6255	11.0024
C15Cl5	11.2104	0.352404	4915	10.5061	10.9654	11.2155	11.4525	11.8802
C15Cl6	11.9152	0.379347	4354	11.1499	11.6631	11.9211	12.1879	12.6145
C15Cl7	12.5355	0.402485	3622	11.709	12.2631	12.5442	12.8214	13.2701
C15Cl8	13.1158	0.410712	3465	12.3152	12.8322	13.1133	13.3939	13.9084
C15Cl9	13.6293	0.416948	3121	12.8078	13.3361	13.6394	13.9307	14.422
C15Cl10	14.0685	0.415008	2013	13.2844	13.7784	14.0658	14.3601	14.8678
C15Cl11	14.4548	0.386286	1616	13.7529	14.1801	14.4362	14.7132	15.2097
C15Cl12	14.8629	0.371385	2322	14.1684	14.5961	14.8492	15.1273	15.5806
C15Cl13	15.3015	0.357386	2674	14.6003	15.045	15.3048	15.5557	15.9662
C15Cl14	15.7496	0.334545	2135	15.0805	15.5133	15.7604	15.9991	16.3588
C15Cl15	16.1921	0.320357	1128	15.556	15.9783	16.188	16.4253	16.7936
C15Cl16	16.6417	0.266034	414	16.1289	16.4597	16.6433	16.8205	17.1707
C15Cl17	17.0612	0.261798	113	16.5295	16.8866	17.0896	17.2332	17.5568
C16Cl0	7.17126	0	323	7.17126	7.17126	7.17126	7.17126	7.17126
C16Cl1	8.1821	0.093011	1675	8.12937	8.12937	8.12937	8.19488	8.54278
C16Cl2	9.15066	0.176492	3723	8.8023	9.08748	9.14721	9.26359	9.50089
C16Cl3	10.0639	0.244019	5182	9.5355	9.9318	10.0888	10.2337	10.5245
C16Cl4	10.9235	0.302279	5339	10.3087	10.7015	10.9407	11.1288	11.4826
C16Cl5	11.7104	0.348075	4890	11.0076	11.471	11.7213	11.9498	12.3551
C16Cl6	12.4536	0.379993	4290	11.6937	12.1965	12.4596	12.7156	13.1654
C16Cl7	13.0953	0.408684	3602	12.28	12.8276	13.1025	13.3761	13.8916
C16Cl8	13.6752	0.416056	3318	12.8672	13.3961	13.6748	13.9609	14.4691
C16Cl9	14.2077	0.421143	3287	13.3822	13.9177	14.2039	14.4926	15.0435
C16Cl10	14.714	0.429171	2357	13.8461	14.406	14.7309	15.0098	15.5293
C16Cl11	15.118	0.422566	1627	14.3328	14.8087	15.1042	15.4102	15.9575
C16Cl12	15.5073	0.390638	1531	14.8048	15.2124	15.4992	15.7779	16.297
C16Cl13	15.8862	0.366696	2286	15.1791	15.6254	15.8829	16.1323	16.6242
C16Cl14	16.3246	0.359519	2548	15.6318	16.0731	16.3212	16.5847	17.0136
C16Cl15	16.7745	0.346149	2033	16.0968	16.5224	16.7737	17.0198	17.4244
C16Cl16	17.2127	0.319341	1028	16.573	16.9888	17.227	17.4525	17.793
C16Cl17	17.6573	0.303073	371	17.0159	17.457	17.677	17.8576	18.2058
C17Cl0	7.66019	0	241	7.66019	7.66019	7.66019	7.66019	7.66019
C17Cl1	8.66671	0.0921132	1449	8.6183	8.6183	8.6183	8.68381	9.03171
C17Cl2	9.63818	0.166949	3197	9.29122	9.57641	9.6129	9.75252	9.98982
C17Cl3	10.5516	0.235476	4814	10.0608	10.4207	10.571	10.7106	11.0134
C17Cl4	11.4193	0.293715	5234	10.8335	11.2218	11.4381	11.6099	11.9716
C17Cl5	12.231	0.3445	4786	11.5386	11.9981	12.2399	12.4741	12.8591
C17Cl6	12.972	0.385858	4176	12.1966	12.7133	12.9869	13.2401	13.6993
C17Cl7	13.648	0.415188	3537	12.8175	13.371	13.6633	13.9401	14.4231
C17Cl8	14.2658	0.431434	3205	13.3856	13.9775	14.2775	14.573	15.0555
C17Cl9	14.8116	0.429485	3226	13.9619	14.5238	14.8199	15.101	15.6299
C17Cl10	15.3152	0.440306	2913	14.4533	15.0133	15.3175	15.6117	16.1776
C17Cl11	15.7802	0.427035	1979	14.969	15.4758	15.7772	16.0782	16.6298
C17Cl12	16.1696	0.408793	1301	15.4059	15.8746	16.1685	16.4462	16.9779
C17Cl13	16.5287	0.390926	1567	15.8356	16.2513	16.5199	16.7811	17.3367
C17Cl14	16.9344	0.373701	2274	16.2006	16.6904	16.9277	17.1826	17.6758
C17Cl15	17.3588	0.376622	2481	16.5968	17.1139	17.3516	17.6243	18.0713
C17Cl16	17.7987	0.352111	1916	17.1126	17.5518	17.7925	18.0556	18.4548
C17Cl17	18.2484	0.332996	933	17.5783	18.003	18.2547	18.4963	18.8605
C17Cl18	18.6725	0.289508	315	18.045	18.4932	18.6955	18.8798	19.1736
C18Cl0	8.14911	0	198	8.14911	8.14911	8.14911	8.14911	8.14911
C18Cl1	9.1482	0.0818349	1205	9.10723	9.10723	9.10723	9.17273	9.28334
C18Cl2	10.12	0.16819	2895	9.76915	10.0653	10.0898	10.2414	10.4787
C18Cl3	11.0402	0.229361	4377	10.5891	10.9097	11.0599	11.1996	11.5024
C18Cl4	11.9054	0.285057	4951	11.3246	11.7233	11.927	12.0988	12.4489
C18Cl5	12.7325	0.33847	4723	12.0583	12.5013	12.7422	12.9725	13.3552
C18Cl6	13.4872	0.378234	4201	12.7237	13.2275	13.4942	13.7586	14.1887
C18Cl7	14.1914	0.407241	3595	13.3867	13.9124	14.1998	14.4624	14.975
C18Cl8	14.8249	0.428327	3049	13.9654	14.5385	14.8298	15.1255	15.6367
C18Cl9	15.384	0.440499	2980	14.5571	15.0775	15.3844	15.6879	16.2514
C18Cl10	15.907	0.453208	3013	15.0447	15.6037	15.9092	16.2205	16.799
C18Cl11	16.3897	0.431616	2401	15.5556	16.0934	16.3849	16.6811	17.2672
C18Cl12	16.8338	0.432413	1571	15.9991	16.5334	16.835	17.1365	17.7053
C18Cl13	17.187	0.41873	1154	16.4509	16.8786	17.168	17.4787	18.0396
C18Cl14	17.5612	0.400316	1640	16.8226	17.2661	17.5493	17.8467	18.3392
C18Cl15	17.9725	0.38989	2313	17.2356	17.7062	17.9629	18.2436	18.733
C18Cl16	18.3907	0.363255	2325	17.6787	18.1345	18.4026	18.6509	19.0677
C18Cl17	18.8134	0.363443	1678	18.0891	18.5572	18.8217	19.0797	19.4793
C18Cl18	19.258	0.317971	903	18.6226	19.0316	19.2602	19.481	19.8521
C18Cl19	19.7185	0.31512	325	19.0687	19.5131	19.7433	19.9252	20.2643
C19Cl0	8.63804	0	157	8.63804	8.63804	8.63804	8.63804	8.63804
C19Cl1	9.64287	0.0944678	896	9.59615	9.59615	9.59615	9.66166	10.0096
C19Cl2	10.6066	0.162168	2612	10.2691	10.5543	10.5788	10.7304	10.9677
C19Cl3	11.5307	0.224698	4011	11.0987	11.3986	11.5369	11.6885	11.9913
C19Cl4	12.4061	0.287501	4668	11.8417	12.2328	12.4159	12.5983	12.9494
C19Cl5	13.2291	0.332163	4638	12.5536	13.0065	13.2296	13.4712	13.825
C19Cl6	14.0124	0.382865	4105	13.2433	13.7654	14.0183	14.2777	14.7414
C19Cl7	14.7161	0.40789	3636	13.905	14.4467	14.7218	15.0031	15.4774
C19Cl8	15.3824	0.42679	3113	14.5507	15.0946	15.3802	15.6745	16.222
C19Cl9	15.9679	0.439159	2831	15.077	15.6668	15.9843	16.2756	16.8149
C19Cl10	16.5164	0.441774	2804	15.645	16.2253	16.5202	16.8026	17.4119
C19Cl11	17.0096	0.439693	2831	16.1565	16.7091	17.0113	17.3196	17.8626
C19Cl12	17.4559	0.451538	1986	16.5827	17.1384	17.4474	17.7734	18.3136
C19Cl13	17.8327	0.441338	1190	16.9551	17.5373	17.8497	18.1252	18.7148
C19Cl14	18.2155	0.424495	1136	17.4572	17.8902	18.1989	18.5124	19.0525
C19Cl15	18.5752	0.400156	1576	17.832	18.2901	18.5804	18.8581	19.3532
C19Cl16	19.0105	0.392445	2285	18.2631	18.7395	19.0032	19.2829	19.7592
C19Cl17	19.4169	0.369606	2313	18.6987	19.1619	19.4284	19.6851	20.1111
C19Cl18	19.8614	0.348522	1588	19.1951	19.622	19.8713	20.1106	20.5138
C19Cl19	20.2549	0.328187	760	19.6217	20.0397	20.2562	20.4865	20.8669
C19Cl20	20.6906	0.316705	297	20.0965	20.478	20.7135	20.9075	21.2833
C20Cl0	9.12697	0	147	9.12697	9.12697	9.12697	9.12697	9.12697
C20Cl1	10.1287	0.090338	800	10.0851	10.0851	10.0851	10.1096	10.4985
C20Cl2	11.0956	0.160277	2196	10.758	11.0432	11.0677	11.2193	11.4566
C20Cl3	12.016	0.221593	3699	11.5915	11.8875	12.0258	12.1774	12.4392
C20Cl4	12.8967	0.279958	4477	12.3551	12.7174	12.9007	13.0847	13.4383
C20Cl5	13.7276	0.33005	4472	13.0676	13.5123	13.735	13.9707	14.3248
C20Cl6	14.5203	0.371052	4096	13.7852	14.2714	14.5277	14.7742	15.2399
C20Cl7	15.2416	0.406162	3665	14.433	14.9647	15.242	15.5288	16.0079
C20Cl8	15.906	0.434948	3050	15.0451	15.6181	15.9129	16.2021	16.7469
C20Cl9	16.5363	0.444926	2694	15.6399	16.2443	16.5405	16.8475	17.3913
C20Cl10	17.1118	0.446065	2692	16.2572	16.8129	17.1138	17.4213	17.9563
C20Cl11	17.6036	0.465206	2859	16.6672	17.2819	17.6172	17.9358	18.501
C20Cl12	18.0836	0.46263	2340	17.1707	17.7625	18.0777	18.3959	18.9506
C20Cl13	18.5329	0.464646	1556	17.6633	18.205	18.5293	18.8575	19.4499
C20Cl14	18.9098	0.440672	923	18.0661	18.5981	18.9022	19.2067	19.7536
C20Cl15	19.2314	0.424729	1120	18.4609	18.9273	19.2208	19.5302	20.0886
C20Cl16	19.6088	0.396449	1664	18.8663	19.3315	19.6012	19.8806	20.3703
C20Cl17	20.0294	0.400427	2296	19.2574	19.7489	20.0258	20.311	20.7878
C20Cl18	20.4401	0.372149	2259	19.7491	20.1835	20.4281	20.6955	21.1591
C20Cl19	20.8623	0.365548	1472	20.1495	20.601	20.8683	21.1243	21.5674
C20Cl20	21.2901	0.336431	714	20.6342	21.0706	21.2991	21.5221	21.9155
C20Cl21	21.7297	0.324703	259	21.0369	21.5276	21.7384	21.9575	22.318

## Sheet: log VP 25C
	mean	SD	n of molecules	0.025	0.25	0.5 (median)	0.75	0.975
C10Cl0	2.53079	0	1316	2.53079	2.53079	2.53079	2.53079	2.53079
C10Cl1	1.3846	0.135605	4815	1.01525	1.25095	1.41586	1.48666	1.48666
C10Cl2	0.325375	0.259208	7581	-0.0996777	0.156172	0.349796	0.502172	0.782272
C10Cl3	-0.616572	0.347386	7559	-1.30872	-0.853476	-0.639708	-0.378313	0.131506
C10Cl4	-1.40837	0.40499	6346	-2.14606	-1.67133	-1.43624	-1.12147	-0.608511
C10Cl5	-2.06663	0.420064	5472	-2.85142	-2.34851	-2.06507	-1.78135	-1.2337
C10Cl6	-2.59851	0.407855	4498	-3.42478	-2.87537	-2.60094	-2.30382	-1.80603
C10Cl7	-3.00104	0.375622	3166	-3.7644	-3.24057	-2.99821	-2.70484	-2.36081
C10Cl8	-3.388	0.328441	3097	-4.04211	-3.61275	-3.36549	-3.17061	-2.82168
C10Cl9	-3.84231	0.298133	3108	-4.39047	-4.08115	-3.8182	-3.64567	-3.26849
C10Cl10	-4.29193	0.255612	1859	-4.74643	-4.47578	-4.30197	-4.11305	-3.78837
C10Cl11	-4.73363	0.229665	706	-5.19692	-4.89099	-4.73783	-4.58086	-4.28792
C10Cl12	-5.24188	0.235775	126	-5.71146	-5.39694	-5.24118	-5.07904	-4.79638
C11Cl0	2.00812	0	1014	2.00812	2.00812	2.00812	2.00812	2.00812
C11Cl1	0.872735	0.132339	4062	0.492575	0.728276	0.963982	0.963982	0.963982
C11Cl2	-0.183982	0.245066	6681	-0.622351	-0.315858	-0.150945	-0.0205016	0.259598
C11Cl3	-1.13258	0.341086	7123	-1.8314	-1.38552	-1.14045	-0.930634	-0.444785
C11Cl4	-1.95972	0.40796	6334	-2.71241	-2.24406	-1.96488	-1.69547	-1.11427
C11Cl5	-2.65639	0.431004	5287	-3.45743	-2.96536	-2.66474	-2.37449	-1.78898
C11Cl6	-3.20985	0.441513	4727	-4.05483	-3.51883	-3.20721	-2.90318	-2.33484
C11Cl7	-3.68534	0.421842	3507	-4.50396	-3.96724	-3.69422	-3.38098	-2.85388
C11Cl8	-4.07017	0.378987	2635	-4.80917	-4.31547	-4.06764	-3.79081	-3.40247
C11Cl9	-4.448	0.340379	3097	-5.10265	-4.68432	-4.42589	-4.22066	-3.85201
C11Cl10	-4.88239	0.296175	2864	-5.41509	-5.10531	-4.87587	-4.67726	-4.33809
C11Cl11	-5.32137	0.26994	1669	-5.825	-5.50433	-5.33207	-5.13572	-4.77644
C11Cl12	-5.77404	0.239798	620	-6.21523	-5.93885	-5.78035	-5.61584	-5.29765
C11Cl13	-6.2258	0.186527	134	-6.57226	-6.34211	-6.22824	-6.08992	-5.87234
C12Cl0	1.48544	0	749	1.48544	1.48544	1.48544	1.48544	1.48544
C12Cl1	0.355217	0.131775	3352	-0.0300985	0.370516	0.441308	0.441308	0.441308
C12Cl2	-0.697842	0.241458	6067	-1.14502	-0.838532	-0.673618	-0.548196	-0.263076
C12Cl3	-1.66256	0.326155	6626	-2.35407	-1.9046	-1.66312	-1.45989	-0.985516
C12Cl4	-2.50054	0.408265	6144	-3.25147	-2.79192	-2.50315	-2.24642	-1.66106
C12Cl5	-3.24163	0.440115	5264	-4.05638	-3.54617	-3.25602	-2.95364	-2.35166
C12Cl6	-3.83899	0.453847	4587	-4.65183	-4.15386	-3.84847	-3.52962	-2.92258
C12Cl7	-4.34299	0.454475	3872	-5.23688	-4.65378	-4.34203	-4.03764	-3.43702
C12Cl8	-4.77354	0.416278	2783	-5.57718	-5.04853	-4.78368	-4.47081	-3.99657
C12Cl9	-5.11458	0.370666	2402	-5.85483	-5.35752	-5.11543	-4.84825	-4.46696
C12Cl10	-5.52208	0.345643	2993	-6.17741	-5.77309	-5.51138	-5.28867	-4.88046
C12Cl11	-5.9355	0.302734	2636	-6.49458	-6.15931	-5.9362	-5.71495	-5.3579
C12Cl12	-6.36281	0.278805	1504	-6.87754	-6.56843	-6.38243	-6.16286	-5.82489
C12Cl13	-6.80536	0.256667	546	-7.22696	-6.99993	-6.81166	-6.6326	-6.28269
C12Cl14	-7.28458	0.250819	140	-7.76536	-7.43561	-7.29595	-7.13114	-6.7672
C13Cl0	0.962768	0	608	0.962768	0.962768	0.962768	0.962768	0.962768
C13Cl1	-0.15344	0.12156	2796	-0.552772	-0.152158	-0.0813656	-0.0813656	-0.0813656
C13Cl2	-1.20774	0.230178	5366	-1.59691	-1.36121	-1.19629	-1.07721	-0.785749
C13Cl3	-2.17443	0.31984	6310	-2.77399	-2.42727	-2.14089	-1.97147	-1.50819
C13Cl4	-3.05747	0.390694	6015	-3.79044	-3.34021	-3.0537	-2.81399	-2.26894
C13Cl5	-3.82126	0.442362	5183	-4.66775	-4.1349	-3.82186	-3.52458	-2.92488
C13Cl6	-4.45341	0.454721	4350	-5.28906	-4.76651	-4.46026	-4.14799	-3.5291
C13Cl7	-4.99242	0.46644	3969	-5.88037	-5.31812	-4.99885	-4.67581	-4.10408
C13Cl8	-5.45668	0.454072	3230	-6.31122	-5.7723	-5.45113	-5.14919	-4.55245
C13Cl9	-5.83225	0.42349	2167	-6.70258	-6.10323	-5.83771	-5.51988	-5.07971
C13Cl10	-6.16335	0.375803	2290	-6.91444	-6.40963	-6.16603	-5.88099	-5.48909
C13Cl11	-6.5468	0.341746	2829	-7.22734	-6.78764	-6.52186	-6.31138	-5.91443
C13Cl12	-6.96884	0.313674	2454	-7.56484	-7.1943	-6.97257	-6.74485	-6.36175
C13Cl13	-7.39717	0.278783	1402	-7.90925	-7.59826	-7.41064	-7.20051	-6.84603
C13Cl14	-7.84833	0.268202	492	-8.37071	-8.03133	-7.85978	-7.66461	-7.32618
C13Cl15	-8.34986	0.227443	120	-8.72583	-8.49435	-8.35232	-8.19254	-7.89662
C14Cl0	0.440095	0	499	0.440095	0.440095	0.440095	0.440095	0.440095
C14Cl1	-0.674464	0.12417	2359	-1.07545	-0.674832	-0.604039	-0.604039	-0.604039
C14Cl2	-1.71867	0.223222	4760	-2.11958	-1.88388	-1.71897	-1.64817	-1.30842
C14Cl3	-2.70617	0.314257	5910	-3.25644	-2.92801	-2.70847	-2.4947	-2.06222
C14Cl4	-3.59229	0.390899	5851	-4.34013	-3.8681	-3.6164	-3.33685	-2.80746
C14Cl5	-4.37367	0.441598	5104	-5.19668	-4.68399	-4.37731	-4.08141	-3.4697
C14Cl6	-5.0646	0.470394	4148	-5.96442	-5.38675	-5.06632	-4.74629	-4.11545
C14Cl7	-5.64583	0.479637	3899	-6.55908	-5.9725	-5.66087	-5.32113	-4.68682
C14Cl8	-6.1247	0.481571	3613	-7.08565	-6.4562	-6.11284	-5.79222	-5.18664
C14Cl9	-6.53993	0.449351	2568	-7.38957	-6.84939	-6.54555	-6.22284	-5.63961
C14Cl10	-6.88402	0.418009	1821	-7.71369	-7.16518	-6.8831	-6.57143	-6.12781
C14Cl11	-7.22719	0.380195	2297	-7.97899	-7.48686	-7.21655	-6.9605	-6.52955
C14Cl12	-7.59046	0.348743	2710	-8.25196	-7.84474	-7.57471	-7.3559	-6.92378
C14Cl13	-8.00528	0.317447	2365	-8.59446	-8.2308	-8.00686	-7.78064	-7.39068
C14Cl14	-8.4486	0.290289	1263	-9.00377	-8.63825	-8.46318	-8.25833	-7.85872
C14Cl15	-8.89459	0.267803	419	-9.42016	-9.07298	-8.90226	-8.70744	-8.39739
C14Cl16	-9.29107	0.224821	119	-9.70454	-9.46049	-9.2911	-9.13538	-8.83194
C15Cl0	-0.0825788	0	387	-0.0825788	-0.0825788	-0.0825788	-0.0825788	-0.0825788
C15Cl1	-1.19374	0.121011	1958	-1.59812	-1.19751	-1.12671	-1.12671	-1.12671
C15Cl2	-2.24656	0.211841	4209	-2.64225	-2.40655	-2.24164	-2.17085	-1.8311
C15Cl3	-3.22994	0.31173	5529	-3.81934	-3.45069	-3.23691	-3.01281	-2.58489
C15Cl4	-4.12027	0.37943	5637	-4.86079	-4.38631	-4.13625	-3.86386	-3.36007
C15Cl5	-4.93978	0.437077	4915	-5.76785	-5.24463	-4.95218	-4.64224	-4.0605
C15Cl6	-5.64981	0.46731	4354	-6.52219	-5.98567	-5.66071	-5.33801	-4.71238
C15Cl7	-6.25119	0.488308	3622	-7.15726	-6.59496	-6.26647	-5.93153	-5.2575
C15Cl8	-6.79034	0.491947	3465	-7.72661	-7.13663	-6.79494	-6.45225	-5.81462
C15Cl9	-7.23637	0.481516	3121	-8.17113	-7.57543	-7.24184	-6.90058	-6.29803
C15Cl10	-7.60113	0.461321	2013	-8.47322	-7.927	-7.60706	-7.27276	-6.72741
C15Cl11	-7.90911	0.410134	1616	-8.72497	-8.17704	-7.90244	-7.60632	-7.18656
C15Cl12	-8.2559	0.37787	2322	-8.98779	-8.51915	-8.24592	-7.98455	-7.55792
C15Cl13	-8.64684	0.352311	2674	-9.30318	-8.89491	-8.64541	-8.39175	-7.96013
C15Cl14	-9.06249	0.324181	2135	-9.65043	-9.30607	-9.07878	-8.8275	-8.41293
C15Cl15	-9.48702	0.306287	1128	-10.081	-9.70067	-9.48385	-9.27923	-8.87364
C15Cl16	-9.92465	0.254006	414	-10.4723	-10.0872	-9.9179	-9.7583	-9.43968
C15Cl17	-10.346	0.264897	113	-10.8299	-10.5283	-10.3539	-10.1606	-9.85657
C16Cl0	-0.605252	0	323	-0.605252	-0.605252	-0.605252	-0.605252	-0.605252
C16Cl1	-1.7106	0.114808	1675	-2.12079	-1.72018	-1.64939	-1.64939	-1.64939
C16Cl2	-2.76315	0.215163	3723	-3.16493	-2.92923	-2.76056	-2.69352	-2.35377
C16Cl3	-3.74691	0.298576	5182	-4.27985	-3.97336	-3.75959	-3.53549	-3.10757
C16Cl4	-4.66	0.373741	5339	-5.34592	-4.91344	-4.67384	-4.40037	-3.92542
C16Cl5	-5.48068	0.430647	4890	-6.26859	-5.7738	-5.50317	-5.19	-4.60518
C16Cl6	-6.23958	0.467952	4290	-7.0983	-6.57593	-6.24815	-5.9296	-5.30373
C16Cl7	-6.87059	0.499623	3602	-7.81484	-7.20995	-6.8811	-6.53819	-5.86187
C16Cl8	-7.41485	0.498107	3318	-8.36602	-7.75591	-7.41594	-7.08239	-6.44035
C16Cl9	-7.89391	0.489949	3287	-8.84196	-8.23052	-7.90398	-7.56253	-6.91798
C16Cl10	-8.33171	0.486256	2357	-9.2453	-8.66739	-8.35683	-7.98733	-7.34703
C16Cl11	-8.65338	0.459942	1627	-9.55538	-8.97469	-8.6524	-8.3314	-7.81595
C16Cl12	-8.97566	0.408662	1531	-9.79821	-9.25252	-8.96286	-8.67189	-8.22876
C16Cl13	-9.29371	0.365906	2286	-10.0206	-9.54594	-9.28287	-9.04566	-8.62814
C16Cl14	-9.68658	0.354116	2548	-10.3798	-9.94023	-9.67673	-9.43308	-9.00599
C16Cl15	-10.1039	0.33589	2033	-10.7544	-10.3419	-10.1114	-9.85912	-9.45249
C16Cl16	-10.522	0.306493	1028	-11.1044	-10.7451	-10.5377	-10.2997	-9.92971
C16Cl17	-10.9579	0.288995	371	-11.4859	-11.1699	-10.9629	-10.7579	-10.3683
C17Cl0	-1.12793	0	241	-1.12793	-1.12793	-1.12793	-1.12793	-1.12793
C17Cl1	-2.22756	0.112802	1449	-2.64347	-2.24285	-2.17206	-2.17206	-2.17206
C17Cl2	-3.28329	0.204842	3197	-3.6876	-3.4519	-3.23813	-3.21619	-2.87644
C17Cl3	-4.26747	0.287886	4814	-4.80253	-4.49603	-4.28226	-4.05816	-3.67966
C17Cl4	-5.19282	0.360122	5234	-5.86859	-5.43166	-5.20042	-4.95447	-4.49397
C17Cl5	-6.04565	0.425291	4786	-6.86387	-6.34535	-6.05145	-5.76209	-5.20206
C17Cl6	-6.80591	0.474203	4176	-7.70112	-7.12804	-6.82248	-6.4826	-5.86888
C17Cl7	-7.47821	0.508264	3537	-8.4086	-7.84005	-7.50713	-7.13529	-6.45033
C17Cl8	-8.07255	0.51932	3205	-9.01161	-8.44156	-8.08692	-7.7317	-7.01803
C17Cl9	-8.57446	0.505559	3226	-9.53463	-8.91615	-8.59284	-8.23738	-7.5541
C17Cl10	-9.0131	0.506539	2913	-9.96872	-9.36715	-9.0204	-8.67202	-8.02749
C17Cl11	-9.40198	0.475695	1979	-10.3257	-9.738	-9.41029	-9.07365	-8.49916
C17Cl12	-9.71893	0.438128	1301	-10.5902	-10.0233	-9.70681	-9.39135	-8.91259
C17Cl13	-10.0064	0.404301	1567	-10.8183	-10.2716	-9.99658	-9.72117	-9.28683
C17Cl14	-10.3555	0.3771	2274	-11.1014	-10.6128	-10.3424	-10.1117	-9.62099
C17Cl15	-10.7405	0.372789	2481	-11.4548	-11.0044	-10.7336	-10.48	-10.0034
C17Cl16	-11.1525	0.343057	1916	-11.7955	-11.4106	-11.1518	-10.9056	-10.4858
C17Cl17	-11.5822	0.325962	933	-12.1752	-11.8269	-11.5814	-11.3528	-10.9411
C17Cl18	-12.0039	0.274588	315	-12.4746	-12.196	-12.022	-11.833	-11.4296
C18Cl0	-1.6506	0	198	-1.6506	-1.6506	-1.6506	-1.6506	-1.6506
C18Cl1	-2.7419	0.101212	1205	-2.93044	-2.76553	-2.69473	-2.69473	-2.69473
C18Cl2	-3.79907	0.20221	2895	-4.21027	-3.97457	-3.73887	-3.73887	-3.39912
C18Cl3	-4.79136	0.280097	4377	-5.3252	-5.01871	-4.80493	-4.58083	-4.22551
C18Cl4	-5.71603	0.351209	4951	-6.36933	-5.95741	-5.72309	-5.48395	-5.01665
C18Cl5	-6.58673	0.414575	4723	-7.37621	-6.87606	-6.59855	-6.30643	-5.75724
C18Cl6	-7.36554	0.466208	4201	-8.23529	-7.70159	-7.37243	-7.05083	-6.41281
C18Cl7	-8.07692	0.498559	3595	-9.01583	-8.41229	-8.08131	-7.7375	-7.08757
C18Cl8	-8.69331	0.518958	3049	-9.67032	-9.05979	-8.69878	-8.35589	-7.6497
C18Cl9	-9.21368	0.522392	2980	-10.2197	-9.56994	-9.21634	-8.85173	-8.22138
C18Cl10	-9.68461	0.526912	3013	-10.6996	-10.0477	-9.68732	-9.33594	-8.67868
C18Cl11	-10.0981	0.491207	2401	-11.0825	-10.4318	-10.0992	-9.76418	-9.14679
C18Cl12	-10.4621	0.474637	1571	-11.4351	-10.7878	-10.4644	-10.1335	-9.54154
C18Cl13	-10.7411	0.446706	1154	-11.635	-11.0423	-10.7211	-10.4078	-9.9624
C18Cl14	-11.0494	0.415508	1640	-11.862	-11.3346	-11.0304	-10.74	-10.3012
C18Cl15	-11.4108	0.39315	2313	-12.1845	-11.6793	-11.3945	-11.1391	-10.653
C18Cl16	-11.7894	0.361559	2325	-12.4542	-12.0441	-11.7964	-11.5319	-11.0934
C18Cl17	-12.1858	0.354585	1678	-12.8353	-12.4466	-12.1909	-11.9206	-11.4905
C18Cl18	-12.6112	0.310469	903	-13.2201	-12.8347	-12.6103	-12.3823	-12.0287
C18Cl19	-13.0623	0.307554	325	-13.6805	-13.2726	-13.0591	-12.8392	-12.4877
C19Cl0	-2.17327	0	157	-2.17327	-2.17327	-2.17327	-2.17327	-2.17327
C19Cl1	-3.27142	0.11446	896	-3.68881	-3.2882	-3.21741	-3.21741	-3.21741
C19Cl2	-4.31759	0.196782	2612	-4.73295	-4.49725	-4.26154	-4.26154	-3.92179
C19Cl3	-5.31578	0.274518	4011	-5.84787	-5.54138	-5.32184	-5.10351	-4.75089
C19Cl4	-6.25374	0.351787	4668	-6.89259	-6.48764	-6.27038	-6.03073	-5.53986
C19Cl5	-7.12187	0.408415	4638	-7.88729	-7.41495	-7.12289	-6.8555	-6.29312
C19Cl6	-7.93585	0.470934	4105	-8.84797	-8.26616	-7.93965	-7.62825	-6.98433
C19Cl7	-8.64654	0.498165	3636	-9.59407	-8.9886	-8.66236	-8.31972	-7.62558
C19Cl8	-9.30621	0.517971	3113	-10.3207	-9.65306	-9.31247	-8.94565	-8.29425
C19Cl9	-9.86722	0.529373	2831	-10.8638	-10.2434	-9.89274	-9.50516	-8.78471
C19Cl10	-10.3717	0.518446	2804	-11.4062	-10.7064	-10.3817	-10.0362	-9.35095
C19Cl11	-10.7965	0.507165	2831	-11.7731	-11.1382	-10.8046	-10.4591	-9.78245
C19Cl12	-11.1678	0.504352	1986	-12.1192	-11.516	-11.1717	-10.818	-10.1716
C19Cl13	-11.4647	0.478909	1190	-12.3978	-11.7849	-11.4871	-11.1352	-10.4763
C19Cl14	-11.7767	0.446778	1136	-12.6982	-12.0825	-11.7544	-11.4387	-10.9966
C19Cl15	-12.0799	0.412755	1576	-12.9119	-12.359	-12.084	-11.7847	-11.3433
C19Cl16	-12.4621	0.397035	2285	-13.223	-12.7391	-12.454	-12.1764	-11.7271
C19Cl17	-12.8297	0.366214	2313	-13.5223	-13.0889	-12.8299	-12.5696	-12.1168
C19Cl18	-13.2495	0.342948	1588	-13.9272	-13.4828	-13.2607	-13.0106	-12.5767
C19Cl19	-13.6367	0.314037	760	-14.2314	-13.856	-13.6432	-13.4106	-13.041
C19Cl20	-14.0581	0.303187	297	-14.6593	-14.281	-14.0503	-13.8634	-13.4847
C20Cl0	-2.69595	0	147	-2.69595	-2.69595	-2.69595	-2.69595	-2.69595
C20Cl1	-3.79071	0.110294	800	-4.21149	-3.74008	-3.74008	-3.74008	-3.74008
C20Cl2	-4.84177	0.193873	2196	-5.25562	-5.01992	-4.78421	-4.78421	-4.44446
C20Cl3	-5.83624	0.269001	3699	-6.32169	-6.06405	-5.85028	-5.62618	-5.27357
C20Cl4	-6.77987	0.342177	4477	-7.41468	-7.00414	-6.76962	-6.55572	-6.0931
C20Cl5	-7.65865	0.406647	4472	-8.43189	-7.93986	-7.66438	-7.3917	-6.8469
C20Cl6	-8.48521	0.457142	4096	-9.35953	-8.8012	-8.48712	-8.17969	-7.56412
C20Cl7	-9.22147	0.496822	3665	-10.1549	-9.57276	-9.22043	-8.88508	-8.21672
C20Cl8	-9.88274	0.5302	3050	-10.9075	-10.2399	-9.89382	-9.52854	-8.83943
C20Cl9	-10.4991	0.534552	2694	-11.5259	-10.8665	-10.5056	-10.1387	-9.44683
C20Cl10	-11.0373	0.532465	2692	-12.0325	-11.4107	-11.0384	-10.6747	-9.98398
C20Cl11	-11.4705	0.541808	2859	-12.4862	-11.8524	-11.483	-11.1047	-10.3759
C20Cl12	-11.8788	0.52939	2340	-12.8707	-12.2519	-11.8819	-11.519	-10.822
C20Cl13	-12.2545	0.514764	1556	-13.2402	-12.607	-12.2642	-11.894	-11.2571
C20Cl14	-12.5576	0.473857	923	-13.4805	-12.8901	-12.5474	-12.2133	-11.6519
C20Cl15	-12.8099	0.438829	1120	-13.6729	-13.1072	-12.7959	-12.486	-11.9922
C20Cl16	-13.1248	0.404563	1664	-13.9027	-13.4084	-13.109	-12.8473	-12.366
C20Cl17	-13.4988	0.398981	2296	-14.2731	-13.7846	-13.4869	-13.2151	-12.7341
C20Cl18	-13.8737	0.367781	2259	-14.601	-14.1239	-13.8617	-13.6217	-13.1853
C20Cl19	-14.2744	0.358124	1472	-15.0042	-14.5233	-14.2683	-14.0212	-13.6032
C20Cl20	-14.6856	0.325261	714	-15.3131	-14.893	-14.6978	-14.4655	-14.0245
C20Cl21	-15.1171	0.301469	259	-15.6724	-15.319	-15.1289	-14.9393	-14.4774

## Sheet: log Sw 25C
	mean	SD	n of molecules	0.025	0.25	0.5 (median)	0.75	0.975
C10Cl0	-5.87483	0	1316	-5.87483	-5.87483	-5.87483	-5.87483	-5.87483
C10Cl1	-5.42784	0.0654755	4815	-5.66505	-5.43737	-5.41032	-5.40598	-5.3903
C10Cl2	-5.10002	0.146227	7581	-5.43741	-5.20054	-5.08886	-4.96852	-4.92579
C10Cl3	-4.91653	0.173669	7559	-5.34412	-4.99996	-4.88362	-4.79791	-4.62363
C10Cl4	-4.85291	0.164955	6346	-5.28066	-4.92672	-4.80936	-4.7402	-4.64849
C10Cl5	-4.9141	0.165094	5472	-5.32153	-4.99746	-4.87562	-4.79159	-4.6903
C10Cl6	-5.07798	0.178059	4498	-5.48611	-5.17781	-5.06211	-4.95229	-4.78439
C10Cl7	-5.32724	0.193967	3166	-5.73151	-5.45467	-5.31041	-5.19253	-4.99012
C10Cl8	-5.63974	0.21699	3097	-6.10859	-5.78294	-5.62284	-5.4836	-5.25503
C10Cl9	-5.96717	0.235029	3108	-6.45121	-6.12559	-5.95983	-5.8006	-5.53415
C10Cl10	-6.30988	0.252676	1859	-6.78353	-6.48635	-6.30757	-6.13511	-5.84042
C10Cl11	-6.70154	0.264052	706	-7.23292	-6.88059	-6.70005	-6.5344	-6.1831
C10Cl12	-7.05875	0.271667	126	-7.57435	-7.23529	-7.07406	-6.87051	-6.5677
C11Cl0	-6.48612	0	1014	-6.48612	-6.48612	-6.48612	-6.48612	-6.48612
C11Cl1	-6.03705	0.0630717	4062	-6.27634	-6.04867	-6.01727	-6.01727	-6.0016
C11Cl2	-5.69263	0.14628	6681	-6.04871	-5.80749	-5.64533	-5.56415	-5.51708
C11Cl3	-5.47614	0.177323	7123	-5.92215	-5.56419	-5.44016	-5.36767	-5.20787
C11Cl4	-5.37847	0.182139	6334	-5.82567	-5.46264	-5.33987	-5.24741	-5.13335
C11Cl5	-5.38068	0.174917	5287	-5.827	-5.46931	-5.3327	-5.25902	-5.15864
C11Cl6	-5.49318	0.184259	4727	-5.9176	-5.59598	-5.46732	-5.35766	-5.21607
C11Cl7	-5.69537	0.198699	3507	-6.14001	-5.81313	-5.67497	-5.55869	-5.36111
C11Cl8	-5.95568	0.202961	2635	-6.37138	-6.08808	-5.94404	-5.81203	-5.58881
C11Cl9	-6.28804	0.227691	3097	-6.7597	-6.44049	-6.27905	-6.12494	-5.8723
C11Cl10	-6.61981	0.24514	2864	-7.11769	-6.77896	-6.61611	-6.4501	-6.16613
C11Cl11	-6.96012	0.261266	1669	-7.49143	-7.13537	-6.95115	-6.77258	-6.47174
C11Cl12	-7.31536	0.289231	620	-7.84808	-7.51757	-7.31587	-7.11956	-6.76565
C11Cl13	-7.69862	0.288002	134	-8.32363	-7.88464	-7.70706	-7.48688	-7.13513
C12Cl0	-7.09742	0	749	-7.09742	-7.09742	-7.09742	-7.09742	-7.09742
C12Cl1	-6.6478	0.0624001	3352	-6.88764	-6.63291	-6.62857	-6.62857	-6.6129
C12Cl2	-6.29053	0.142896	6067	-6.58002	-6.40312	-6.23661	-6.17544	-6.12838
C12Cl3	-6.04509	0.179052	6626	-6.47906	-6.14108	-6.01705	-5.92794	-5.75366
C12Cl4	-5.91166	0.193905	6144	-6.3891	-6.01029	-5.8779	-5.77602	-5.64974
C12Cl5	-5.87435	0.184595	5264	-6.34688	-5.96487	-5.83353	-5.73761	-5.62676
C12Cl6	-5.93444	0.190987	4587	-6.41836	-6.03196	-5.89776	-5.8008	-5.66739
C12Cl7	-6.08691	0.197282	3872	-6.5378	-6.19989	-6.06363	-5.94747	-5.76537
C12Cl8	-6.32427	0.211807	2783	-6.78332	-6.45475	-6.3123	-6.17577	-5.95593
C12Cl9	-6.60772	0.214931	2402	-7.05145	-6.74715	-6.59718	-6.45505	-6.21848
C12Cl10	-6.9238	0.237395	2993	-7.40341	-7.08844	-6.91199	-6.75572	-6.50321
C12Cl11	-7.26862	0.262401	2636	-7.80147	-7.43826	-7.25955	-7.08659	-6.79102
C12Cl12	-7.61137	0.279211	1504	-8.17286	-7.79517	-7.60415	-7.41885	-7.07994
C12Cl13	-7.9725	0.285356	546	-8.5156	-8.164	-7.97968	-7.78273	-7.43523
C12Cl14	-8.29989	0.298311	140	-8.81645	-8.52566	-8.32657	-8.09903	-7.68808
C13Cl0	-7.70872	0	608	-7.70872	-7.70872	-7.70872	-7.70872	-7.70872
C13Cl1	-7.25462	0.05492	2796	-7.49894	-7.24421	-7.23987	-7.23987	-7.22419
C13Cl2	-6.88904	0.139323	5366	-7.19132	-6.99554	-6.80675	-6.77536	-6.75534
C13Cl3	-6.62159	0.184235	6310	-7.06152	-6.71649	-6.60358	-6.49535	-6.3379
C13Cl4	-6.45222	0.19573	6015	-6.94153	-6.55395	-6.42124	-6.31368	-6.16848
C13Cl5	-6.38496	0.198377	5183	-6.87182	-6.48442	-6.34056	-6.24458	-6.1192
C13Cl6	-6.39753	0.191244	4350	-6.87117	-6.49461	-6.35631	-6.25865	-6.14248
C13Cl7	-6.50623	0.198195	3969	-6.95533	-6.61421	-6.47945	-6.36333	-6.20564
C13Cl8	-6.70392	0.21091	3230	-7.15977	-6.8343	-6.68501	-6.55486	-6.34868
C13Cl9	-6.94832	0.223039	2167	-7.41766	-7.08637	-6.93794	-6.79583	-6.54735
C13Cl10	-7.23977	0.231877	2290	-7.71504	-7.38765	-7.22728	-7.07794	-6.81067
C13Cl11	-7.57477	0.250359	2829	-8.0897	-7.73782	-7.56251	-7.4027	-7.1115
C13Cl12	-7.90739	0.274971	2454	-8.47224	-8.09373	-7.8956	-7.71583	-7.38811
C13Cl13	-8.2551	0.293881	1402	-8.87172	-8.45147	-8.23932	-8.06409	-7.67805
C13Cl14	-8.58763	0.309088	492	-9.13447	-8.80129	-8.59475	-8.37476	-7.98035
C13Cl15	-8.96301	0.306039	120	-9.57714	-9.13623	-8.95686	-8.76193	-8.32474
C14Cl0	-8.32001	0	499	-8.32001	-8.32001	-8.32001	-8.32001	-8.32001
C14Cl1	-7.86742	0.0582408	2359	-8.11023	-7.8555	-7.85116	-7.85116	-7.83549
C14Cl2	-7.49171	0.136153	4760	-7.79332	-7.60365	-7.41371	-7.38665	-7.36664
C14Cl3	-7.20505	0.186389	5910	-7.63597	-7.30126	-7.20144	-7.07658	-6.92919
C14Cl4	-7.00855	0.203257	5851	-7.47588	-7.1203	-6.97724	-6.85996	-6.70169
C14Cl5	-6.91597	0.215819	5104	-7.46257	-7.02755	-6.86692	-6.7599	-6.62786
C14Cl6	-6.89496	0.209006	4148	-7.40945	-7.00595	-6.84604	-6.74291	-6.61509
C14Cl7	-6.95407	0.20559	3899	-7.42784	-7.06673	-6.92021	-6.80327	-6.65238
C14Cl8	-7.10732	0.215095	3613	-7.61243	-7.22534	-7.08489	-6.96018	-6.76211
C14Cl9	-7.31722	0.22608	2568	-7.81009	-7.45293	-7.29542	-7.16704	-6.91477
C14Cl10	-7.57431	0.227624	1821	-8.07207	-7.71575	-7.55912	-7.41854	-7.17772
C14Cl11	-7.87786	0.238671	2297	-8.3726	-8.03091	-7.86555	-7.71033	-7.44641
C14Cl12	-8.21725	0.265082	2710	-8.76078	-8.39358	-8.21014	-8.03248	-7.71654
C14Cl13	-8.5518	0.278622	2365	-9.09344	-8.73282	-8.54407	-8.35795	-8.03601
C14Cl14	-8.89712	0.300859	1263	-9.51479	-9.09895	-8.89669	-8.68657	-8.33427
C14Cl15	-9.2722	0.31741	419	-9.87479	-9.48546	-9.28121	-9.07003	-8.61536
C14Cl16	-9.61972	0.330429	119	-10.2437	-9.85738	-9.6124	-9.40534	-9.1016
C15Cl0	-8.93131	0	387	-8.93131	-8.93131	-8.93131	-8.93131	-8.93131
C15Cl1	-8.47711	0.0547082	1958	-8.72153	-8.4668	-8.46246	-8.46246	-8.44679
C15Cl2	-8.09073	0.132229	4209	-8.37707	-8.20246	-8.02501	-7.99795	-7.97794
C15Cl3	-7.79479	0.1842	5529	-8.22471	-7.88317	-7.78383	-7.65648	-7.5291
C15Cl4	-7.57155	0.210078	5637	-8.06541	-7.68398	-7.54066	-7.41982	-7.23904
C15Cl5	-7.45008	0.215023	4915	-7.95141	-7.5737	-7.41126	-7.29259	-7.13132
C15Cl6	-7.3992	0.217834	4354	-7.93102	-7.51347	-7.35144	-7.24201	-7.10834
C15Cl7	-7.429	0.217793	3622	-7.9588	-7.53785	-7.38999	-7.27048	-7.12665
C15Cl8	-7.52408	0.211763	3465	-8.00446	-7.64627	-7.4951	-7.37477	-7.19022
C15Cl9	-7.70308	0.224604	3121	-8.19811	-7.83544	-7.68261	-7.54337	-7.32531
C15Cl10	-7.94182	0.238304	2013	-8.46377	-8.08036	-7.9255	-7.77258	-7.53202
C15Cl11	-8.21331	0.234759	1616	-8.71321	-8.35806	-8.19672	-8.04973	-7.79424
C15Cl12	-8.52063	0.256296	2322	-9.05708	-8.6926	-8.5039	-8.34436	-8.05966
C15Cl13	-8.86854	0.2775	2674	-9.43009	-9.05283	-8.85683	-8.68205	-8.34709
C15Cl14	-9.19863	0.293938	2135	-9.81077	-9.39295	-9.18797	-8.9964	-8.6631
C15Cl15	-9.54246	0.311594	1128	-10.1778	-9.75582	-9.53474	-9.33893	-8.93074
C15Cl16	-9.89418	0.328409	414	-10.5472	-10.1123	-9.90054	-9.67114	-9.30227
C15Cl17	-10.2368	0.329589	113	-10.9323	-10.4615	-10.2173	-10.0496	-9.60093
C16Cl0	-9.54261	0	323	-9.54261	-9.54261	-9.54261	-9.54261	-9.54261
C16Cl1	-9.08641	0.0496384	1675	-9.33283	-9.0781	-9.07376	-9.07376	-9.05809
C16Cl2	-8.69786	0.129503	3723	-8.98837	-8.7837	-8.6363	-8.6049	-8.58923
C16Cl3	-8.38767	0.180951	5182	-8.83168	-8.47282	-8.37631	-8.26001	-8.12472
C16Cl4	-8.15432	0.215952	5339	-8.66838	-8.27498	-8.12176	-8.0029	-7.7955
C16Cl5	-7.99536	0.227365	4890	-8.52174	-8.11835	-7.95715	-7.83338	-7.6485
C16Cl6	-7.91237	0.222501	4290	-8.45029	-8.02963	-7.86346	-7.75249	-7.60473
C16Cl7	-7.9104	0.227101	3602	-8.45321	-8.02789	-7.86732	-7.74411	-7.60286
C16Cl8	-7.98107	0.224445	3318	-8.51157	-8.10629	-7.946	-7.81638	-7.65212
C16Cl9	-8.11563	0.23151	3287	-8.6418	-8.25438	-8.08442	-7.95206	-7.73863
C16Cl10	-8.32742	0.231633	2357	-8.82073	-8.46604	-8.30888	-8.16711	-7.90417
C16Cl11	-8.57319	0.245617	1627	-9.07457	-8.74063	-8.55255	-8.40584	-8.13989
C16Cl12	-8.85104	0.249892	1531	-9.37356	-9.00269	-8.8407	-8.67255	-8.3931
C16Cl13	-9.1776	0.268256	2286	-9.74588	-9.35581	-9.17358	-8.98661	-8.68619
C16Cl14	-9.51493	0.290377	2548	-10.1043	-9.70595	-9.50242	-9.31292	-8.97656
C16Cl15	-9.84172	0.305997	2033	-10.4586	-10.0486	-9.83567	-9.62813	-9.26447
C16Cl16	-10.1887	0.342221	1028	-10.8945	-10.4107	-10.1803	-9.96621	-9.56279
C16Cl17	-10.5368	0.329168	371	-11.1782	-10.7602	-10.5506	-10.3131	-9.89319
C17Cl0	-10.1539	0	241	-10.1539	-10.1539	-10.1539	-10.1539	-10.1539
C17Cl1	-9.69714	0.0501309	1449	-9.94412	-9.68939	-9.68505	-9.68505	-9.66938
C17Cl2	-9.30123	0.127317	3197	-9.54322	-9.36794	-9.2476	-9.2162	-9.20053
C17Cl3	-8.97903	0.17707	4814	-9.41532	-9.06912	-8.97303	-8.83991	-8.73168
C17Cl4	-8.72428	0.212191	5234	-9.2203	-8.84294	-8.69766	-8.58197	-8.38679
C17Cl5	-8.54535	0.225009	4786	-9.05854	-8.67457	-8.51518	-8.38295	-8.18953
C17Cl6	-8.44516	0.233138	4176	-9.00835	-8.57211	-8.4024	-8.27367	-8.12148
C17Cl7	-8.42401	0.239003	3537	-8.99921	-8.55597	-8.37472	-8.24585	-8.09048
C17Cl8	-8.45129	0.232107	3205	-9.0031	-8.5715	-8.41625	-8.28166	-8.1235
C17Cl9	-8.54725	0.225425	3226	-9.05693	-8.68147	-8.52132	-8.38605	-8.18909
C17Cl10	-8.72054	0.235582	2913	-9.23534	-8.86142	-8.69131	-8.56026	-8.32084
C17Cl11	-8.94043	0.245509	1979	-9.4673	-9.08854	-8.92343	-8.77228	-8.50163
C17Cl12	-9.18728	0.251309	1301	-9.68487	-9.35423	-9.17482	-9.00533	-8.74561
C17Cl13	-9.47547	0.258229	1567	-10.0375	-9.63705	-9.45958	-9.30031	-9.02316
C17Cl14	-9.80779	0.276587	2274	-10.3677	-9.99396	-9.7974	-9.61043	-9.2753
C17Cl15	-10.1544	0.289286	2481	-10.7527	-10.3449	-10.144	-9.95988	-9.62326
C17Cl16	-10.4912	0.312973	1916	-11.1292	-10.6986	-10.4819	-10.2787	-9.89574
C17Cl17	-10.8209	0.344748	933	-11.463	-11.0461	-10.8233	-10.5866	-10.1719
C17Cl18	-11.1791	0.369839	315	-11.9129	-11.4104	-11.1768	-10.9282	-10.4531
C18Cl0	-10.7652	0	198	-10.7652	-10.7652	-10.7652	-10.7652	-10.7652
C18Cl1	-10.3052	0.0416565	1205	-10.3277	-10.3007	-10.2963	-10.2963	-10.2807
C18Cl2	-9.90565	0.119985	2895	-10.1545	-9.97489	-9.84322	-9.8275	-9.81183
C18Cl3	-9.57375	0.173271	4377	-9.98238	-9.66839	-9.57517	-9.42144	-9.34298
C18Cl4	-9.31356	0.220426	4951	-9.84105	-9.4325	-9.28776	-9.16163	-8.95102
C18Cl5	-9.11115	0.239409	4723	-9.6656	-9.24061	-9.07635	-8.94287	-8.74204
C18Cl6	-8.98568	0.236306	4201	-9.52457	-9.12583	-8.94596	-8.81129	-8.62358
C18Cl7	-8.92325	0.236809	3595	-9.49476	-9.05635	-8.87518	-8.74511	-8.59781
C18Cl8	-8.93398	0.236818	3049	-9.49154	-9.07237	-8.89722	-8.75753	-8.58617
C18Cl9	-8.99202	0.234736	2980	-9.54183	-9.12423	-8.95332	-8.82914	-8.64189
C18Cl10	-9.12392	0.245914	3013	-9.70779	-9.26378	-9.09161	-8.95179	-8.72871
C18Cl11	-9.31123	0.245469	2401	-9.84808	-9.45183	-9.29096	-9.14568	-8.87275
C18Cl12	-9.5639	0.262474	1571	-10.1219	-9.73104	-9.55546	-9.38415	-9.08523
C18Cl13	-9.8267	0.261822	1154	-10.3752	-9.99764	-9.81063	-9.64582	-9.35909
C18Cl14	-10.1188	0.267395	1640	-10.6833	-10.2932	-10.1053	-9.93288	-9.64109
C18Cl15	-10.4616	0.28866	2313	-11.0362	-10.66	-10.4451	-10.2539	-9.92626
C18Cl16	-10.8024	0.308004	2325	-11.4177	-11.0064	-10.7879	-10.5918	-10.2266
C18Cl17	-11.1346	0.320437	1678	-11.7633	-11.3471	-11.124	-10.9152	-10.5296
C18Cl18	-11.4693	0.339899	903	-12.1198	-11.7033	-11.4678	-11.2308	-10.8153
C18Cl19	-11.8285	0.373407	325	-12.5304	-12.0881	-11.8368	-11.578	-11.124
C19Cl0	-11.3765	0	157	-11.3765	-11.3765	-11.3765	-11.3765	-11.3765
C19Cl1	-10.9208	0.0523271	896	-11.1667	-10.912	-10.9076	-10.9076	-10.892
C19Cl2	-10.5149	0.119405	2612	-10.7658	-10.5862	-10.4431	-10.4388	-10.4231
C19Cl3	-10.1769	0.175863	4011	-10.6176	-10.2753	-10.1788	-10.0057	-9.95427
C19Cl4	-9.89123	0.211727	4668	-10.4084	-10.014	-9.8595	-9.74539	-9.53683
C19Cl5	-9.67571	0.233855	4638	-10.2224	-9.80418	-9.65073	-9.51261	-9.28932
C19Cl6	-9.53328	0.250732	4105	-10.123	-9.67433	-9.49399	-9.35076	-9.15299
C19Cl7	-9.45746	0.246505	3636	-10.0547	-9.59946	-9.41618	-9.27295	-9.10482
C19Cl8	-9.43745	0.256535	3113	-10.0692	-9.57043	-9.38873	-9.24951	-9.0855
C19Cl9	-9.46912	0.239989	2831	-10.0323	-9.60268	-9.43216	-9.29259	-9.10961
C19Cl10	-9.56061	0.238601	2804	-10.1017	-9.69968	-9.5344	-9.39229	-9.16713
C19Cl11	-9.72951	0.253984	2831	-10.3135	-9.87713	-9.70472	-9.55382	-9.30909
C19Cl12	-9.94972	0.253979	1986	-10.5015	-10.0971	-9.93418	-9.77063	-9.51329
C19Cl13	-10.1949	0.265343	1190	-10.7579	-10.349	-10.1773	-10.0065	-9.72997
C19Cl14	-10.4572	0.259574	1136	-11.008	-10.6141	-10.4494	-10.2733	-9.99526
C19Cl15	-10.7855	0.278265	1576	-11.3498	-10.9718	-10.7753	-10.587	-10.2555
C19Cl16	-11.0981	0.299366	2285	-11.7255	-11.2914	-11.0801	-10.8897	-10.5541
C19Cl17	-11.4467	0.317604	2313	-12.0735	-11.6669	-11.4333	-11.2257	-10.8534
C19Cl18	-11.7806	0.331813	1588	-12.4486	-11.999	-11.7686	-11.5493	-11.1471
C19Cl19	-12.133	0.362684	760	-12.847	-12.3575	-12.1226	-11.8798	-11.4829
C19Cl20	-12.4379	0.336878	297	-13.1114	-12.6456	-12.4187	-12.2305	-11.8274
C20Cl0	-11.9878	0	147	-11.9878	-11.9878	-11.9878	-11.9878	-11.9878
C20Cl1	-11.5305	0.0485808	800	-11.778	-11.5189	-11.5189	-11.5189	-11.5033
C20Cl2	-11.1224	0.117144	2196	-11.3771	-11.1741	-11.0544	-11.0501	-11.0344
C20Cl3	-10.7669	0.174555	3699	-11.205	-10.8717	-10.7373	-10.6126	-10.5656
C20Cl4	-10.4788	0.213067	4477	-10.977	-10.5928	-10.4492	-10.3381	-10.1281
C20Cl5	-10.253	0.23921	4472	-10.7982	-10.3855	-10.228	-10.0859	-9.87217
C20Cl6	-10.0852	0.256638	4096	-10.7004	-10.2249	-10.0452	-9.90502	-9.68836
C20Cl7	-9.98538	0.257472	3665	-10.6164	-10.1301	-9.94099	-9.79922	-9.60623
C20Cl8	-9.95071	0.260513	3050	-10.5779	-10.0966	-9.90523	-9.76183	-9.57368
C20Cl9	-9.95267	0.250161	2694	-10.5374	-10.0914	-9.91617	-9.76603	-9.59104
C20Cl10	-10.0229	0.251962	2692	-10.6115	-10.1605	-9.98734	-9.84137	-9.63693
C20Cl11	-10.1541	0.254086	2859	-10.7254	-10.2978	-10.1261	-9.97715	-9.73364
C20Cl12	-10.3345	0.262023	2340	-10.8927	-10.4901	-10.3207	-10.1508	-9.86282
C20Cl13	-10.5609	0.266709	1556	-11.1521	-10.7164	-10.5384	-10.377	-10.0905
C20Cl14	-10.8139	0.27453	923	-11.4177	-10.9905	-10.7908	-10.6217	-10.3243
C20Cl15	-11.0895	0.270159	1120	-11.6441	-11.2673	-11.0881	-10.902	-10.6026
C20Cl16	-11.4218	0.293909	1664	-11.9816	-11.6206	-11.4151	-11.2177	-10.8744
C20Cl17	-11.7475	0.313384	2296	-12.4047	-11.9511	-11.7375	-11.5278	-11.1735
C20Cl18	-12.0935	0.335456	2259	-12.7786	-12.3066	-12.0936	-11.8651	-11.4572
C20Cl19	-12.4374	0.338297	1472	-13.0816	-12.6661	-12.4221	-12.2096	-11.7734
C20Cl20	-12.7945	0.363894	714	-13.5026	-13.0497	-12.7938	-12.5545	-12.0924
C20Cl21	-13.0838	0.371443	259	-13.7417	-13.3324	-13.089	-12.8308	-12.3245
